# Supplementary material
Source: Research Square preprint supplement (doi:10.21203/rs.3.rs-9871587/v1)
Supplement: Supplementary file 1 [file a9dc079abd653312dcab37d6.xlsx]

## Sheet: Fig. 2a AFM height profile
Fig. 2a Description: AFM image and height profile of the BP-COOH functional layer on the Au film. Sample: 13 nm SPR+BP-COOH Measurement: AFM height profile Instrument: Bruker Dimension Icon Mode: ScanAsyst mode X-axis: Distance (nm) Y-axis: Thickness / height (nm) Thickness determined from height profile: approximately 13 nm Notes: The height profile was extracted along the dashed line in the AFM…
Distance (nm)	Thickness (nm)
0	0.262326
3.90625	0.547395
7.8125	0.796319
11.7188	0.91403
15.625	1.00317
19.5312	1.10492
23.4375	1.14789
27.3438	1.15723
31.25	1.21803
35.1562	0.536662
39.0625	0.576978
42.9688	0.804454
46.875	0.943775
50.7812	0.525487
54.6875	0.640853
58.5938	0.151222
62.5	-0.288012
66.4062	-0.507517
70.3125	-0.804725
74.2188	-0.828359
78.125	-0.940518
82.0312	-1.01559
85.9375	-1.0972
89.8438	-1.02946
93.75	-0.946345
97.6562	-0.985996
101.562	-0.999772
105.469	-0.11783
109.375	0.751551
113.281	0.851801
117.188	0.8759
121.094	0.691401
125	0.632158
128.906	0.484237
132.812	0.467781
136.719	0.359803
140.625	0.44267
144.531	-0.0249117
148.438	0.19655
152.344	-0.211719
156.25	-0.737307
160.156	-0.799569
164.062	-0.83569
167.969	-1.05279
171.875	-1.07347
175.781	-1.06705
179.688	-0.721079
183.594	-0.497893
187.5	-0.357504
191.406	-0.40738
195.312	-0.462352
199.219	-0.036627
203.125	0.376433
207.031	0.589737
210.938	0.655616
214.844	0.582272
218.75	0.327078
222.656	0.0269969
226.562	-0.281857
230.469	-0.434914
234.375	-0.592218
238.281	-0.589311
242.188	-0.577381
246.094	-0.547064
250	-0.349899
253.906	-0.181507
257.812	-0.0266256
261.719	0.328478
265.625	0.80494
269.531	1.11843
273.438	1.37346
277.344	1.54934
281.25	1.62547
285.156	1.15164
289.062	0.572649
292.969	0.675976
296.875	0.339811
300.781	0.0145714
304.688	-0.802381
308.594	-1.30025
312.5	-1.32079
316.406	-1.26198
320.312	-1.21888
324.219	-1.12708
328.125	-1.02635
332.031	-0.862807
335.938	-0.573794
339.844	-0.219846
343.75	-0.0148088
347.656	0.225998
351.562	0.463293
355.469	0.873016
359.375	1.13815
363.281	1.47316
367.188	1.75666
371.094	1.86167
375	2.03824
378.906	2.04085
382.812	1.80222
386.719	1.40311
390.625	0.943642
394.531	0.496887
398.438	0.0211376
402.344	-0.425479
406.25	-0.99173
410.156	-1.01306
414.062	-0.0566494
417.969	0.0648213
421.875	-0.00819358
425.781	-0.356554
429.688	-0.423001
433.594	-0.577601
437.5	-0.77098
441.406	-0.888478
445.312	-1.22394
449.219	-1.25528
453.125	-1.09755
457.031	-1.102
460.938	-1.09394
464.844	-1.20795
468.75	-1.04445
472.656	-0.85572
476.562	-0.596273
480.469	-0.425712
484.375	-0.22655
488.281	-0.0326772
492.188	0.116093
496.094	0.302636
500	0.466827
503.906	0.468427
507.812	0.489365
511.719	0.438575
515.625	0.28331
519.531	-0.0513882
523.438	-0.372644
527.344	-0.825322
531.25	-1.20118
535.156	-1.44883
539.062	-1.43594
542.969	-1.57784
546.875	-2.03204
550.781	-1.41112
554.688	-1.13082
558.594	-0.793711
562.5	-1.01273
566.406	-1.13493
570.312	-1.0848
574.219	-1.01818
578.125	-0.878627
582.031	-0.846396
585.938	-1.15036
589.844	-1.31601
593.75	-0.729764
597.656	-0.531202
601.562	-0.489754
605.469	-0.555623
609.375	-0.476754
613.281	-0.366548
617.188	-0.0923364
621.094	0.888299
625	2.33404
628.906	5.0221
632.812	7.16718
636.719	14.2648
640.625	14.5163
644.531	14.5244
648.438	14.679
652.344	13.9448
656.25	13.0984
660.156	12.7511
664.062	12.7279
667.969	12.1383
671.875	12.0656
675.781	12.1552
679.688	12.4837
683.594	12.5631
687.5	12.5867
691.406	12.5802
695.312	13.2171
699.219	13.503
703.125	13.5303
707.031	13.6064
710.938	13.6915
714.844	13.898
718.75	14.2818
722.656	14.541
726.562	14.5092
730.469	13.7459
734.375	13.7526
738.281	13.8674
742.188	13.2172
746.094	13.213
750	13.5579
753.906	13.7268
757.812	13.863
761.719	13.8442
765.625	13.8119
769.531	13.5726
773.438	13.3724
777.344	13.4384
781.25	13.4549
785.156	13.559
789.062	13.9447
792.969	14.1227
796.875	14.1432
800.781	13.9999
804.688	13.7978
808.594	13.7461
812.5	13.8632
816.406	13.8168
820.312	13.7246
824.219	13.6596
828.125	13.6364
832.031	13.674
835.938	13.7911
839.844	13.5939
843.75	13.2148
847.656	12.8849
851.562	12.5446
855.469	12.4475
859.375	12.2485
863.281	12.3205
867.188	12.3674
871.094	12.6633
875	12.7446
878.906	12.8751
882.812	12.8344
886.719	12.8453
890.625	12.8455
894.531	13.0212
898.438	13.1974
902.344	13.3178
906.25	13.3036
910.156	13.355
914.062	13.4499
917.969	13.4696
921.875	13.4907
925.781	13.2595
929.688	13.1284
933.594	12.7695
937.5	12.8086
941.406	12.6829
945.312	12.7725
949.219	12.945
953.125	12.997
957.031	12.9192
960.938	13.8231
964.844	13.669
968.75	13.5434
972.656	13.4237
976.562	13.4301
980.469	13.4332
984.375	13.4253
988.281	13.4506
992.188	13.3981
996.094	13.3637

## Sheet: Fig. 2l XPS before Pb exposure
Fig. 2l Description: High-resolution XPS spectra of O 1s, C 1s, Pb 4f, P 2p and Au 4f before Pb²⁺ exposure. Sample: 13 nm SPR+BP-COOH before Pb²⁺ exposure X-axis: Binding energy (eV) Y-axis: Intensity (a.u.) Data included: Binding energy, raw intensity, fitted envelope, fitted component intensities, and baseline. Notes: For each fitted XPS region, the available source data include Binding energy …
Au 4f before Pb²⁺ exposure							C 1s before Pb²⁺ exposure								O 1s before Pb²⁺ exposure							P 2p before Pb²⁺ exposure						Pb 4f before Pb²⁺ exposure
Binding energy (eV)	Raw intensity (a.u.)	Fitted envelope (a.u.)	Au 4f₇/₂ component (a.u.)	Au 4f₅/₂ component (a.u.)	Baseline (a.u.)		Binding energy (eV)	Raw intensity (a.u.)	Fitted envelope (a.u.)	C–C component (a.u.)	C–O component (a.u.)	O=C–O component (a.u.)	Baseline (a.u.)		Binding energy (eV)	Raw intensity (a.u.)	Fitted envelope (a.u.)	O=C–O component (a.u.)	P–O component (a.u.)	Baseline (a.u.)		Binding energy (eV)	Raw intensity (a.u.)	Fitted envelope (a.u.)	P–O component (a.u.)	Baseline (a.u.)		Binding energy (eV)	Raw intensity (a.u.)	Baseline (a.u.)
99	4298.72	4298.72	0	0	0		298	13034.2	13034.2	0	0	0	0		545	26759.1	26759.1	0	0	0		144	6247.81	6247.81	0	0		153	7003.42	0
98.9	4183.13	4089.6	4089.6	4089.6	4089.6		297.9	12636.4	12692.1	12692.1	12692.1	12692.1	12692.1		544.9	26770.4	26616.8	26616.8	26616.8	26616.8		143.9	6147.39	6172.28	6172.28	6172.28		152.9	6782.84	6853.09
98.8	4071.16	4087.61	4087.61	4087.61	4087.61		297.8	12443.7	12562.4	12562.4	12562.4	12562.4	12562.4		544.8	26309.3	26609.5	26609.5	26609.5	26609.5		143.8	6041.15	6143.31	6143.31	6143.31		152.8	6701.49	6840.62
98.7	3805.38	4085.52	4085.52	4085.52	4085.52		297.7	12654	12508.5	12508.5	12508.5	12508.5	12508.5		544.7	26628.3	26600.8	26600.8	26600.8	26600.8		143.7	6252.76	6141.45	6141.45	6141.45		152.7	6924.64	6800.76
98.6	4167.39	4082.57	4082.57	4082.57	4082.57		297.6	12291.1	12455.4	12455.4	12455.4	12455.4	12455.4		544.6	26643.9	26564.2	26564.2	26564.2	26564.2		143.6	6131.92	6126.55	6126.55	6126.55		152.6	6909.33	6745.95
98.5	4130.76	4079.57	4079.57	4079.57	4079.57		297.5	12503.1	12453.4	12453.4	12453.4	12453.4	12453.4		544.5	27242	26531.7	26531.7	26531.7	26531.7		143.5	6416.98	6107.65	6107.65	6107.65		152.5	6642.33	6723.59
98.4	4084.49	4075.01	4075.01	4075.01	4075.01		297.4	12384.9	12437.4	12437.4	12437.4	12437.4	12437.4		544.4	26415.6	26477.9	26477.9	26477.9	26477.9		143.4	6152.79	6082.23	6082.23	6082.23		152.4	6547.06	6719.18
98.3	4099.52	4018.17	4018.17	4018.17	4018.17		297.3	12687.5	12424.8	12424.8	12424.8	12424.8	12424.8		544.3	26618.8	26411.6	26411.6	26411.6	26411.6		143.3	6088.66	6047.58	6047.58	6047.58		152.3	6594.6	6615.24
98.2	4023.19	3968.08	3968.08	3968.08	3968.08		297.2	12492.6	12400.2	12400.2	12400.2	12400.2	12400.2		544.2	26626.8	26312.3	26312.3	26312.3	26312.3		143.2	6337.8	6016.44	6016.44	6016.44		152.2	6932.78	6580.78
98.1	3925.07	3950.5	3950.5	3950.5	3950.5		297.1	12445.1	12370.4	12370.4	12370.4	12370.4	12370.4		544.1	27120.7	26214.6	26214.6	26214.6	26214.6		143.1	5881.52	5986.7	5986.7	5986.7		152.1	6369.59	6533.43
98	3815.92	3941.7	3941.7	3941.7	3941.7		297	12477.9	12328.7	12328.7	12328.7	12328.7	12328.7		544	26702.7	26112	26112	26112	26112		143	6233.1	5954.05	5954.05	5954.05		152	6459.85	6530.92
97.9	3909.45	3936.4	3936.4	3936.4	3936.4		296.9	12469.1	12292.4	12292.4	12292.4	12292.4	12292.4		543.9	26048.9	26010.5	26010.5	26010.5	26010.5		142.9	6078.97	5920.44	5920.44	5920.44		151.9	6310.32	6461.62
97.8	4010.41	3920.34	3920.34	3920.34	3920.34		296.8	12386.1	12261.9	12261.9	12261.9	12261.9	12261.9		543.8	26083.7	25890	25890	25890	25890		142.8	5960.31	5902.95	5902.95	5902.95		151.8	6596.63	6461.08
97.7	4116.64	3887.29	3887.29	3887.29	3887.29		296.7	12213	12243	12243	12243	12243	12243		543.7	26619.3	25779.9	25779.9	25779.9	25779.9		142.7	5807.31	5873.43	5873.43	5873.43		151.7	6571.69	6457.48
97.6	3985.39	3835.78	3835.78	3835.78	3835.78		296.6	12077.1	12224	12224	12224	12224	12224		543.6	26286.8	25684.7	25684.7	25684.7	25684.7		142.6	6082.75	5860.33	5860.33	5860.33		151.6	6601.13	6450.47
97.5	3767.69	3776.55	3776.55	3776.55	3776.55		296.5	12386.4	12199.5	12199.5	12199.5	12199.5	12199.5		543.5	25795.5	25585	25585	25585	25585		142.5	5718.03	5852.49	5852.49	5852.49		151.5	6705.22	6437.6
97.4	3770.83	3743.78	3743.78	3743.78	3743.78		296.4	12487.1	12191.5	12191.5	12191.5	12191.5	12191.5		543.4	25711.1	25489.9	25489.9	25489.9	25489.9		142.4	5896.66	5844.45	5844.45	5844.45		151.4	6734.09	6424.84
97.3	3694.43	3735.65	3735.65	3735.65	3735.65		296.3	11955.4	12179.7	12179.7	12179.7	12179.7	12179.7		543.3	25492.8	25417.4	25417.4	25417.4	25417.4		142.3	5929.02	5829.04	5829.04	5829.04		151.3	6525.68	6412.01
97.2	3645.14	3728.99	3728.99	3728.99	3728.99		296.2	12243.9	12162	12162	12162	12162	12162		543.2	25588.8	25362.5	25362.5	25362.5	25362.5		142.2	5945.64	5828.97	5828.97	5828.97		151.2	6514.78	6399.12
97.1	3911.95	3721.64	3721.64	3721.64	3721.64		296.1	12139.3	12137.5	12137.5	12137.5	12137.5	12137.5		543.1	25474.5	25303.6	25303.6	25303.6	25303.6		142.1	5655.82	5828.58	5828.58	5828.58		151.1	6544.88	6388.26
97	3756.14	3714.07	3714.07	3714.07	3714.07		296	12443.1	12136.5	12136.5	12136.5	12136.5	12136.5		543	25609.5	25243	25243	25243	25243		142	5870.69	5828.12	5828.12	5828.12		151	6483.17	6381.29
96.9	3744.06	3704.16	3704.16	3704.16	3704.16		295.9	11906.1	12132.3	12132.3	12132.3	12132.3	12132.3		542.9	25450.9	25175	25175	25175	25175		141.9	5934.37	5827.5	5827.5	5827.5		150.9	6374.29	6376.57
96.8	3707.94	3680.8	3680.8	3680.8	3680.8		295.8	12332	12123.9	12123.9	12123.9	12123.9	12123.9		542.8	25382.7	25106.8	25106.8	25106.8	25106.8			5999.32	5826.45	5826.45	5826.45		150.8	6313.57	6372.01
96.7	3821.9	3675.04	3675.04	3675.04	3675.04		295.7	12761.3	12113.4	12113.4	12113.4	12113.4	12113.4		542.7	25263.4	25026	25026	25026	25026		141.7	6155.34	5824.62	5824.62	5824.62		150.7	6475.22	6365.64
96.6	3494.65	3665.39	3665.39	3665.39	3665.39		295.6	12361.8	12102.8	12102.8	12102.8	12102.8	12102.8		542.6	25475.2	24939.6	24939.6	24939.6	24939.6		141.6	6033.35	5822.27	5822.27	5822.27		150.6	6662.87	6357.54
96.5	3800.17	3661.1	3661.1	3661.1	3661.1		295.5	12379.3	12086.2	12086.2	12086.2	12086.2	12086.2		542.5	25392.4	24861.6	24861.6	24861.6	24861.6		141.5	6118.2	5819.24	5819.24	5819.24		150.5	6586.77	6346.91
96.4	3544.41	3652.88	3652.88	3652.88	3652.88		295.4	12626	12066	12066	12066	12066	12066		542.4	24856.1	24794.7	24794.7	24794.7	24794.7		141.4	6256.08	5815.63	5815.63	5815.63		150.4	6534.46	6335.93
96.3	3775.3	3646.26	3646.26	3646.26	3646.26		295.3	12714.4	12042.8	12042.8	12042.8	12042.8	12042.8		542.3	24756.8	24740.1	24740.1	24740.1	24740.1		141.3	6272.77	5812.54	5812.54	5812.54		150.3	6290.22	6323.48
96.2	3718.08	3620.66	3620.66	3620.66	3620.66		295.2	13032	12012.2	12012.2	12012.2	12012.2	12012.2		542.2	24655.4	24699	24699	24699	24699		141.2	5878.24	5809.49	5809.49	5809.49		150.2	6540.03	6311.31
96.1	3807.7	3602.99	3602.99	3602.99	3602.99		295.1	13210.5	11975.7	11975.7	11975.7	11975.7	11975.7		542.1	24888.7	24679.4	24679.4	24679.4	24679.4		141.1	6002.64	5806.88	5806.88	5806.88		150.1	6583.88	6299.56
96	3577.42	3567.1	3567.1	3567.1	3567.1		295	12996.4	11934.6	11934.6	11934.6	11934.6	11934.6		542	24653.3	24648.7	24648.7	24648.7	24648.7		141	5884	5804.81	5804.81	5804.81		150	6498.16	6289.57
95.9	3618.59	3541.3	3541.3	3541.3	3541.3		294.9	13042.2	11889	11889	11889	11889	11889		541.9	25047.5	24601.5	24601.5	24601.5	24601.5		140.9	5977.46	5803.18	5803.18	5803.18		149.9	6342.75	6276.12
95.8	3529.72	3528.97	3528.97	3528.97	3528.97		294.8	13107	11841.6	11841.6	11841.6	11841.6	11841.6		541.8	25042.4	24558.4	24558.4	24558.4	24558.4		140.8	6052.12	5801.6	5801.6	5801.6		149.8	6518.19	6265.2
95.7	3443.69	3524.02	3524.02	3524.02	3524.02		294.7	13042.1	11799.3	11799.3	11799.3	11799.3	11799.3		541.7	24357.5	24531.4	24531.4	24531.4	24531.4		140.7	5841.72	5799.8	5799.8	5799.8		149.7	6280.97	6257.88
95.6	3520.63	3519.51	3519.51	3519.51	3519.51		294.6	12343.6	11761.3	11761.3	11761.3	11761.3	11761.3		541.6	24296.2	24501.1	24501.1	24501.1	24501.1		140.6	6101.36	5798.01	5798.01	5798.01		149.6	6253.19	6252.85
95.5	3503.41	3515.24	3515.24	3515.24	3515.24		294.5	12253	11725.3	11725.3	11725.3	11725.3	11725.3		541.5	24630.2	24471.8	24471.8	24471.8	24471.8		140.5	5873.4	5796.27	5796.27	5796.27		149.5	6285.87	6249.87
95.4	3552.3	3511.36	3511.36	3511.36	3511.36		294.4	12608.9	11693.3	11693.3	11693.3	11693.3	11693.3		541.4	24903.4	24466.4	24466.4	24466.4	24466.4		140.4	5945.9	5794.56	5794.56	5794.56		149.4	6158.76	6249.57
95.3	3456.13	3498.59	3498.59	3498.59	3498.59		294.3	12418.5	11667.9	11667.9	11667.9	11667.9	11667.9		541.3	24171.8	24449.6	24449.6	24449.6	24449.6		140.3	6024.23	5792.83	5792.83	5792.83		149.3	6270.55	6248.54
95.2	3677.92	3489.24	3489.24	3489.24	3489.24		294.2	12046	11645.2	11645.2	11645.2	11645.2	11645.2		541.2	24548.8	24420.1	24420.1	24420.1	24420.1		140.2	5843.92	5790.89	5790.89	5790.89		149.2	6375.84	6247.02
95.1	3383.51	3483.68	3483.68	3483.68	3483.68		294.1	11881.6	11623.2	11623.2	11623.2	11623.2	11623.2		541.1	24462.7	24392.3	24392.3	24392.3	24392.3		140.1	6197.39	5788.63	5788.63	5788.63		149.1	6310.07	6243.85
95	3341.72	3478.55	3478.55	3478.55	3478.55		294	12066.6	11604.9	11604.9	11604.9	11604.9	11604.9		541	24392.5	24361.3	24361.3	24361.3	24361.3		140	6020.9	5786.28	5786.28	5786.28		149	6501.59	6238.76
94.9	3478.92	3466.01	3466.01	3466.01	3466.01		293.9	12018.5	11586.9	11586.9	11586.9	11586.9	11586.9		540.9	24786.3	24319.5	24319.5	24319.5	24319.5		139.9	5980.59	5784.4	5784.4	5784.4		148.9	6402.72	6233.17
94.8	3534.73	3460.55	3460.55	3460.55	3460.55		293.8	12304.4	11571.4	11571.4	11571.4	11571.4	11571.4		540.8	24224.9	24267.9	24267.9	24267.9	24267.9		139.8	5778.57	5782.91	5782.91	5782.91		148.8	6312.2	6228.05
94.7	3481.39	3449.79	3449.79	3449.79	3449.79		293.7	11646.8	11559.8	11559.8	11559.8	11559.8	11559.8		540.7	24527.4	24213.4	24213.4	24213.4	24213.4		139.7	5645.69	5781.78	5781.78	5781.78		148.7	6282.74	6221.99
94.6	3412.86	3431.14	3431.14	3431.14	3431.14		293.6	11298.5	11550.4	11550.4	11550.4	11550.4	11550.4		540.6	24238.6	24141.3	24141.3	24141.3	24141.3		139.6	6013.96	5780.38	5780.38	5780.38		148.6	6412.22	6215.18
94.5	3396.61	3416.62	3416.62	3416.62	3416.62		293.5	11741.7	11544	11544	11544	11544	11544		540.5	24510.1	24075.8	24075.8	24075.8	24075.8		139.5	6148.29	5778.84	5778.84	5778.84		148.5	6572.53	6209.53
94.4	3332.84	3397.87	3397.87	3397.87	3397.87		293.4	11582.8	11543.4	11543.4	11543.4	11543.4	11543.4		540.4	24252.8	23969	23969	23969	23969		139.4	6042.94	5777.08	5777.08	5777.08		148.4	6211.75	6203.94
94.3	3526.46	3366.17	3366.17	3366.17	3366.17		293.3	11521.6	11542.4	11542.4	11542.4	11542.4	11542.4		540.3	24887	23853.8	23853.8	23853.8	23853.8		139.3	5872.71	5774.8	5774.8	5774.8		148.3	6275.12	6195.94
94.2	3416.24	3348.63	3348.63	3348.63	3348.63		293.2	11572.4	11538.1	11538.1	11538.1	11538.1	11538.1		540.2	24234.4	23742.5	23742.5	23742.5	23742.5		139.2	5901.5	5772.24	5772.24	5772.24		148.2	6583.39	6186.37
94.1	3205.79	3339.61	3339.61	3339.61	3339.61		293.1	11901.6	11532	11532	11532	11532	11532		540.1	23625.5	23629.7	23629.7	23629.7	23629.7		139.1	6135.37	5769.74	5769.74	5769.74		148.1	6589.39	6178.99
94	3282.59	3332.85	3332.85	3332.85	3332.85		293	12079.9	11523.3	11523.3	11523.3	11523.3	11523.3		540	24058.1	23527.5	23527.5	23527.5	23527.5		139	6106	5767.09	5767.09	5767.09		148	6228.39	6168.59
93.9	3284.79	3331.92	3331.92	3331.92	3331.92		292.9	12043.2	11508.9	11508.8	11508.8	11508.9	11508.8		539.9	23509	23459.2	23459.2	23459.2	23459.2		138.9	6106.57	5763.86	5763.86	5763.86		147.9	6588.79	6157.46
93.8	3474.85	3329.53	3329.53	3329.53	3329.53		292.8	12578.5	11487.7	11487.6	11487.6	11487.7	11487.6		539.8	23630.3	23395.6	23395.6	23395.6	23395.6		138.8	6144.21	5760.69	5760.69	5760.69		147.8	6326.98	6147.84
93.7	3469.16	3317.89	3317.89	3317.89	3317.89		292.7	12817.2	11463	11463	11463	11463	11463		539.7	23831.1	23340.7	23340.7	23340.7	23340.7		138.7	5861.47	5757.99	5757.99	5757.99		147.7	6325.41	6139.87
93.6	3627.69	3299.62	3299.62	3299.62	3299.62		292.6	12471	11431.8	11431.7	11431.7	11431.8	11431.7		539.6	23146.8	23307.9	23307.9	23307.9	23307.9		138.6	5887.23	5755.6	5755.6	5755.6		147.6	6318.89	6130.4
93.5	3539.4	3279.53	3279.53	3279.53	3279.53		292.5	13237.5	11393.6	11393.5	11393.5	11393.6	11393.5		539.5	23295.9	23272.8	23272.8	23272.8	23272.8		138.5	5937.18	5753.67	5753.67	5753.67		147.5	6397.99	6121.97
93.4	3280.87	3259.27	3259.27	3259.27	3259.27		292.4	13245.8	11351.9	11351.8	11351.8	11351.9	11351.8		539.4	23428	23250.9	23250.9	23250.9	23250.9		138.4	5873.75	5752.46	5752.46	5752.46		147.4	6403.53	6113.24
93.3	3385.38	3237.29	3237.29	3237.29	3237.29		292.3	13073.5	11307.2	11307	11307	11307.2	11307		539.3	23171.6	23249.5	23249.5	23249.5	23249.5		138.3	5781.35	5750.98	5750.98	5750.98		147.3	6328.11	6103.76
93.2	3454.38	3217.98	3217.98	3217.98	3217.98		292.2	13223.9	11257	11256.7	11256.7	11257	11256.7		539.2	23212.3	23235.4	23235.4	23235.4	23235.4		138.2	5986.12	5749.93	5749.93	5749.93		147.2	6390.76	6094.52
93.1	3395.46	3201.27	3201.27	3201.27	3201.27		292.1	13337.7	11203.9	11203.6	11203.6	11203.9	11203.6		539.1	23547.4	23211.4	23211.4	23211.4	23211.4		138.1	5674.9	5748.22	5748.22	5748.22		147.1	6241.61	6085.62
93	3322.03	3185.18	3185.18	3185.18	3185.18		292	13566.5	11151.6	11151.1	11151.1	11151.6	11151.1		539	23543.1	23194	23194	23194	23194		138	6248.11	5746.38	5746.38	5746.37		147	6312.07	6077.87
92.9	3171.79	3169.58	3169.58	3169.58	3169.58		291.9	12862.3	11100.8	11100.2	11100.2	11100.8	11100.2		538.9	23089.5	23168	23168	23168	23168		137.9	5937.05	5744.36	5744.36	5744.36		146.9	6207.38	6073.33
92.8	3286.46	3153.12	3153.12	3153.12	3153.12		291.8	12527.5	11052.8	11051.9	11051.9	11052.8	11051.9		538.8	23366.8	23129	23129	23129	23129		137.8	5853.26	5743.12	5743.12	5743.12		146.8	5853.61	6070.89
92.7	3422.92	3139.22	3139.22	3139.22	3139.22		291.7	12476.1	11009.2	11007.9	11007.9	11009.2	11007.9		538.7	23522.4	23095.7	23095.7	23095.7	23095.7		137.7	5599.69	5741.3	5741.3	5741.3		146.7	6084.48	6070.49
92.6	3197.16	3128.45	3128.45	3128.45	3128.45		291.6	12283.6	10971.6	10969.8	10969.8	10971.6	10969.8		538.6	23175.9	23080.1	23080.1	23080.1	23080.1		137.6	5953.62	5740.17	5740.17	5740.17		146.6	5950.96	6070.29
92.5	3107.91	3116.55	3116.55	3116.55	3116.55		291.5	12198.8	10938.6	10936.1	10936.1	10938.6	10936.1		538.5	22798.8	23067.2	23067.2	23067.2	23067.2		137.5	5897.96	5738.85	5738.85	5738.85		146.5	6256.02	6069.32
92.4	3177.03	3105	3105	3105	3105		291.4	11854	10908.5	10905.1	10905.1	10908.5	10905.1		538.4	22922.6	23047.6	23047.6	23047.6	23047.6		137.4	6025.29	5737.4	5737.4	5737.39		146.4	6423.14	6067.26
92.3	3217.03	3099.11	3099.11	3099.11	3099.11		291.3	11823	10883	10878.4	10878.4	10883	10878.4		538.3	23527.6	23044.8	23044.8	23044.8	23044.8		137.3	5915.2	5734.8	5734.8	5734.79		146.3	6154.34	6064.44
92.2	3098.91	3094.61	3094.61	3094.61	3094.61		291.2	11518.9	10862.2	10856	10856	10862.2	10856		538.2	22869	23041.6	23041.6	23041.6	23041.6		137.2	6153.92	5732.61	5732.61	5732.6		146.2	6287.98	6061.07
92.1	3103.87	3089.27	3089.27	3089.27	3089.27		291.1	11320.1	10846.1	10837.8	10837.8	10846.1	10837.8		538.1	23166	23026	23026	23026	23026		137.1	5742.97	5730.92	5730.92	5730.89		146.1	6090.93	6058.89
92	3128.76	3087.52	3087.52	3087.52	3087.52		291	11265.8	10835.1	10823.9	10823.9	10835.1	10823.9		538	23193	23004.6	23004.6	23004.6	23004.6		137	5647.92	5729.63	5729.63	5729.58		146	5902.84	6057.07
91.9	2981.1	3087.32	3087.32	3087.32	3087.32		290.9	10932.4	10828.7	10813.8	10813.8	10828.7	10813.8		537.9	23045.5	22988.9	22988.9	22988.9	22988.9		136.9	5820.81	5728.69	5728.69	5728.63		145.9	6310.12	6054.44
91.8	3124.98	3087.09	3087.09	3087.09	3087.09		290.8	11016	10824.9	10805.2	10805.2	10824.9	10805.2		537.8	23240.9	22966.7	22966.7	22966.7	22966.7		136.8	5738.16	5728.25	5728.25	5728.15		145.8	6369.57	6052.73
91.7	3135.82	3086.73	3086.73	3086.73	3086.73		290.7	11184.7	10824.1	10798.4	10798.4	10824.1	10798.4		537.7	23014.9	22958.3	22958.3	22958.3	22958.3		136.7	5913.57	5727.17	5727.17	5727.02		145.7	6016.24	6051.27
91.6	3311.27	3086.3	3086.3	3086.3	3086.3		290.6	10944	10827.6	10794	10794	10827.6	10794		537.6	22609.3	22953.4	22953.4	22953.4	22953.4		136.6	6059.46	5725.22	5725.22	5725		145.6	6007.38	6048.75
91.5	3256.77	3085.73	3085.73	3085.73	3085.73		290.5	10751.6	10832.2	10788.6	10788.6	10832.2	10788.6		537.5	23044.1	22953.2	22953.2	22953.2	22953.2		136.5	6081.42	5723.43	5723.43	5723.1		145.5	6194.41	6046.24
91.4	3194.58	3085.23	3085.23	3085.23	3085.23		290.4	11102.9	10840.9	10784.7	10784.7	10840.9	10784.7		537.4	22857.6	22953.1	22953.1	22953.1	22953.1		136.4	5754.17	5721.67	5721.67	5721.19		145.4	6295.07	6043.24
91.3	3003.47	3084.64	3084.64	3084.64	3084.64		290.3	10700.5	10854.1	10782.2	10782.2	10854.1	10782.2		537.3	23417.5	22952.9	22952.9	22952.9	22952.9		136.3	5732.75	5719.84	5719.84	5719.13		145.3	6494.09	6037.87
91.2	3297.96	3084.17	3084.17	3084.17	3084.17		290.2	10906.9	10870.4	10778.8	10778.8	10870.4	10778.8		537.2	23003.6	22952.6	22952.6	22952.6	22952.6		136.2	5974.28	5717.98	5717.98	5716.97		145.2	6673.11	6031.84
91.1	3093.76	3083.71	3083.71	3083.71	3083.71		290.1	11100.1	10889.2	10773.2	10773.2	10889.2	10773.2		537.1	23051.1	22952.3	22952.3	22952.3	22952.3		136.1	6106.84	5716.52	5716.52	5715.08		145.1	6168.42	6026.1
91	3227.04	3083.31	3083.31	3083.31	3083.31		290	11155.6	10913.1	10767.1	10767.1	10913.1	10767.1		537	23044	22951.9	22951.9	22951.9	22951.9		136	5936.04	5715.01	5715.01	5712.95		145	6082.3	6020.68
90.9	3101.79	3082.84	3082.84	3082.84	3082.84		289.9	11184.8	10944.2	10761.6	10761.6	10944.2	10761.6		536.9	23580.1	22951.5	22951.5	22951.5	22951.5		135.9	5859.4	5712.57	5712.57	5709.69		144.9	6178.42	6017.07
90.8	3114.52	3082.42	3082.42	3082.42	3082.42		289.8	10553.2	10984.6	10757.6	10757.6	10984.6	10757.6		536.8	22953.1	22951.2	22951.2	22951.2	22951.2		135.8	6284.74	5710.44	5710.44	5706.42		144.8	5955.15	6015.73
90.7	3205.4	3081.83	3081.83	3081.83	3081.83		289.7	10586.3	11035.7	10755.2	10755.2	11035.7	10755.2		536.7	22912.6	22950.9	22950.9	22950.9	22950.9		135.7	5960.75	5709.28	5709.28	5703.72		144.7	6010.76	6014.89
90.6	3366.12	3081.34	3081.34	3081.34	3081.34		289.6	10771.7	11097.9	10753.6	10753.6	11097.9	10753.6		536.6	23081.9	22950.5	22950.5	22950.4	22950.4		135.6	5814.06	5709.2	5709.2	5701.58		144.6	6018.63	6013.34
90.5	3053.39	3080.81	3080.81	3080.81	3080.81		289.5	11005.1	11173.6	10753.5	10753.5	11173.6	10753.5		536.5	23736.2	22950	22950	22949.8	22949.8		135.5	5647.9	5709.81	5709.81	5699.44		144.5	6278.03	6011.56
90.4	3178.21	3080.12	3080.12	3080.12	3080.12		289.4	10851.5	11262.7	10753.4	10753.4	11262.7	10753.4		536.4	23781.9	22949.2	22949.2	22948.9	22948.9		135.4	5850.55	5712.82	5712.82	5698.83		144.4	6232.07	6008.2
90.3	3365.51	3079.33	3079.33	3079.33	3079.33		289.3	10656	11366.7	10753.2	10753.2	11366.7	10753.2		536.3	24240.7	22948.2	22948.2	22947.8	22947.8		135.3	5524.42	5717.22	5717.22	5698.49		144.3	6396.23	6004.23
90.2	3376.79	3078.6	3078.6	3078.6	3078.6		289.2	11121.5	11487	10752.9	10752.9	11487	10752.9		536.2	23769.9	22947	22947	22946.5	22946.5		135.2	5821.92	5723.25	5723.25	5698.39		144.2	6163.35	5998.73
90.1	3243.18	3077.7	3077.7	3077.7	3077.7		289.1	11624.2	11625.1	10752.4	10752.4	11625.1	10752.4		536.1	24144.4	22945.7	22945.7	22944.9	22944.9		135.1	5647.65	5730.63	5730.63	5697.9		144.1	6434.86	5992.87
90	3332.98	3076.76	3076.76	3076.76	3076.76		289	11820.2	11782.1	10751.7	10751.7	11782.1	10751.7		536	24669.3	22944.4	22944.4	22943.2	22943.2		135	5946.82	5740.51	5740.51	5697.76		144	6353.33	5986.84
89.9	3251.1	3075.84	3075.84	3075.84	3075.84		288.9	12151	11958.9	10750.7	10750.7	11958.9	10750.7		535.9	24035.8	22943.2	22943.2	22941.4	22941.4		134.9	5571.05	5752.49	5752.49	5697.14		143.9	6251.86	5981.6
89.8	3313.68	3074.96	3074.96	3074.96	3074.96		288.8	12199	12156.1	10749.3	10749.3	12156.1	10749.3		535.8	24586.1	22942.1	22942.1	22939.5	22939.5		134.8	5906.7	5767.56	5767.56	5696.48		143.8	6146.49	5976.14
89.7	3308.65	3074.01	3074.01	3074.01	3074.01		288.7	12686.6	12373.9	10747.8	10747.8	12373.9	10747.8		535.7	24585	22941.1	22941.1	22937.4	22937.4		134.7	5842.88	5785.99	5785.99	5695.48		143.7	6199.5	5971.81
89.6	3347.73	3073.17	3073.17	3073.17	3073.17		288.6	12658.6	12611.8	10746	10746	12611.8	10746		535.6	24657.6	22940.6	22940.6	22935.2	22935.2		134.6	5912.55	5808.65	5808.65	5694.39		143.6	6086.82	5968.24
89.5	3153.44	3072.17	3072.17	3072.17	3072.17		288.5	13289.6	12868.6	10744	10744.1	12868.6	10744		535.5	24966.1	22940.4	22940.4	22932.8	22932.8		134.5	6014.93	5835.89	5835.89	5692.88		143.5	6120.95	5964.48
89.4	3508.28	3070.97	3070.97	3070.97	3070.97		288.4	13254.2	13142.1	10741.7	10741.8	13142.1	10741.7		535.4	25075	22941	22941	22930.2	22930.2		134.4	5891.86	5868.78	5868.78	5691.36		143.4	6285.43	5960.35
89.3	3635.04	3069.72	3069.71	3069.72	3069.71		288.3	13821.3	13429.4	10739.2	10739.3	13429.3	10739.2		535.3	25245.9	22942.6	22942.6	22927.4	22927.4		134.3	5905.95	5907.66	5907.66	5689.5		143.3	6235.16	5956.69
89.2	3392.69	3068.36	3068.33	3068.36	3068.33		288.2	13943	13726.7	10736.4	10736.7	13726.4	10736.4		535.2	25389.5	22945.6	22945.6	22924.4	22924.3		134.2	6094.89	5952.9	5952.9	5687.1		143.2	6044.21	5953.6
89.1	3548.99	3066.91	3066.83	3066.91	3066.83		288.1	13725.1	14029	10733.5	10734.1	14028.4	10733.5		535.1	25632.2	22950.7	22950.6	22921.2	22921.1		134.1	6335.21	6005.45	6005.45	5684.61		143.1	5909.16	5950.03
89	3336.58	3065.59	3065.38	3065.59	3065.38		288	14551.6	14330.6	10730.2	10731.6	14329.3	10730.2		535	25623.6	22958.7	22958.5	22918.1	22917.9		134	6075.07	6065.58	6065.58	5682		143	6243.95	5947.51
88.9	3430.52	3064.6	3064.03	3064.6	3064.03		287.9	14570.3	14625.3	10726.8	10729.6	14622.6	10726.8		534.9	24948.6	22970.6	22970.3	22915.1	22914.8		133.9	5969.98	6132.96	6132.96	5678.85		142.9	5967.41	5945.49
88.8	3445.69	3063.95	3062.49	3063.95	3062.49		287.8	14960.7	14906.6	10723.1	10728.8	14900.9	10723.1		534.8	24990.2	22987.8	22987.2	22912.4	22911.7		133.8	6319.47	6207.41	6207.41	5675.21		142.8	6082.47	5943.09
88.7	3705.02	3064.34	3060.76	3064.34	3060.76		287.7	15109.8	15167.9	10719.2	10730.3	15156.7	10719.2		534.7	25028.1	23011.9	23010.6	22910.1	22908.8		133.7	6458.19	6288.79	6288.79	5671.57		142.7	6138.86	5940.46
88.6	3854.24	3067.16	3058.75	3067.16	3058.75		287.6	15229.4	15404.1	10715.1	10736.5	15382.6	10715.1		534.6	25355.3	23045.1	23042.5	22908.6	22906		133.6	6318.75	6375.78	6375.78	5667.67		142.6	5965.46	5937.32
88.5	3795.24	3075.37	3056.45	3075.37	3056.45		287.5	15218.4	15611.6	10710.9	10750.9	15571.3	10710.8		534.5	24882.6	23089.8	23084.7	22908.1	22903		133.5	6268.38	6466.29	6466.29	5662.93		142.5	6372.27	5933.36
88.4	3899.75	3094.69	3053.91	3094.69	3053.91		287.4	15819.3	15790.2	10706.5	10779.5	15716.7	10706.3		534.4	25730.3	23149.8	23140.1	22909.6	22899.8		133.4	6609.99	6558.46	6558.46	5657.54		142.4	6185.31	5929.7
88.3	3834.4	3135.51	3051.22	3135.51	3051.22		287.3	15813.6	15944.2	10702	10831.9	15813.6	10701.6		534.3	25661.3	23230.3	23212	22914.8	22896.5		133.3	6801.24	6650.4	6650.4	5652.11		142.3	5978.29	5925.82
88.2	3935.46	3215.2	3048.25	3215.2	3048.25		287.2	15994.9	16084.7	10697.5	10922.2	15858.5	10696.8		534.2	25379.4	23338	23304.6	22926.6	22893.2		133.2	6467.81	6738.59	6738.59	5646.05		142.2	6187.19	5920.45
88.1	4317.18	3361.7	3044.83	3361.7	3044.83		287.1	16261.9	16231.1	10693.1	11071.8	15849.5	10691.7		534.1	25833.8	23482.1	23422.4	22949.2	22889.5		133.1	6791	6819.64	6819.64	5639.16		142.1	6365.04	5915.82
88	4526.69	3617	3040.97	3617	3040.97		287	16327.1	16413.7	10689.2	11310.5	15787	10686.5		534	25928.9	23675.3	23571.2	22989.9	22885.7		133	6887.35	6890.44	6890.44	5631.64		142	6140.61	5911.56
87.9	4609.45	4038.56	3036.37	4038.56	3036.37		286.9	16690.2	16674.9	10685.9	11678.1	15672.7	10681		533.9	26382.7	23934.8	23757.1	23059.3	22881.6		132.9	7071	6947.7	6947.7	5623.41		141.9	6057.53	5906.31
87.8	5060.47	4697.47	3030.52	4697.47	3030.52		286.8	17332	17070.2	10684.2	12225.8	15510.5	10675.1		533.8	26896.9	24283.8	23987.5	23173.1	22876.9		132.8	7328.91	6988.63	6988.63	5614.54		141.8	6241.66	5901.38
87.7	6002.59	5669.54	3023.23	5669.54	3023.23		286.7	17673.4	17666.8	10684.9	13014.1	15305.5	10668.9		533.7	27519.6	24753	24270.5	23354.1	22871.6		132.7	6928.27	7011.29	7011.29	5605.36		141.7	6070.87	5897.65
87.6	6680.81	7014.21	3013.81	7014.21	3013.81		286.6	18348.9	18539.1	10689.9	14109.2	15063.9	10662		533.6	28221.4	25382.8	24615	23633.4	22865.6		132.6	6996.92	7014.33	7014.33	5596.06		141.6	6002.55	5894.69
87.5	8063.2	8742.26	3001.4	8742.26	3001.4		286.5	20031.2	19760.7	10702	15574.3	14792.6	10654.1		533.5	28952.5	26224	25030.8	24051.7	22858.5		132.5	6943.92	6997.51	6997.51	5586.96		141.5	5904.76	5891.08
87.4	9553.19	10775.6	2984.92	10775.6	2984.92		286.4	21468.3	21389.8	10725.5	17455.5	14499	10645.1		533.4	30478.4	27338.7	25528	24660.8	22850.2		132.4	6866.57	6961.57	6961.57	5578.45		141.4	6226.72	5887.44
87.3	11795.3	12916	2963.77	12916	2963.77		286.3	23780.4	23451	10767	19762.8	14190.2	10634.5		533.3	31948.8	28798.8	26117	25521.9	22840.1		132.3	6822.68	6907.19	6907.19	5569.89		141.3	6234.59	5882.81
87.2	13737.5	14847.3	2937.36	14847.3	2937.36		286.2	25874.1	25913.4	10836.4	22448	13872.9	10621.9		533.2	34299.6	30682.9	26808.1	26702.7	22828		132.2	6929.06	6836.57	6836.57	5561.36		141.2	6335.25	5878.68
87.1	15368	16198.8	2905.73	16198.8	2905.73		286.1	28871.7	28671.6	10947.7	25384.6	13553.7	10607.3		533.1	36631.1	33068.2	27610.9	28270.4	22813.2		132.1	6926.69	6752.49	6752.49	5552.91		141.1	5837.85	5874.87
87	16664.1	16664.1	2869.8	16664.1	2869.8		286	31165.5	31536.9	11120.7	28358.7	13238	10590.2		533	39549.4	36019.8	28534.2	30280.9	22795.3		132	6853.56	6658.19	6658.19	5544.61		141	5798.19	5872.29
86.9	16597.9	16124.5	2831.39	16124.5	2831.39		285.9	34255.8	34251.5	11381.8	31080.6	12930.5	10570.8		532.9	42396.4	39573	29584.5	32762.5	22774		131.9	6701.53	6556.94	6556.94	5536.44		140.9	5858.42	5870.32
86.8	15777.4	14702.8	2792.84	14702.8	2792.84		285.8	36307.2	36528.6	11765.7	33225.7	12635.4	10549.1		532.8	46111.4	43714	30766	35696.6	22748.7		131.8	6684.9	6452.35	6452.35	5528.77		140.8	6050.83	5869.45
86.7	13789.1	12708.4	2756.18	12708.4	2756.18		285.7	37798.8	38119.5	12315.8	34499.2	12355.8	10525.6		532.7	49709.4	48357.5	32078.9	38997.5	22718.9		131.7	6500.73	6347.71	6347.71	5521.89		140.7	6012.55	5867.41
86.6	12021.3	10513.9	2723.27	10513.9	2723.27		285.6	38367.9	38885.7	13084	34709	12094.1	10500.7		532.6	55032.7	53332.8	33519.3	42497.8	22684.3		131.6	6268.17	6245.89	6245.89	5516.05		140.6	6166.17	5864.58
86.5	10252.6	8435.94	2695.07	8435.94	2695.07		285.5	38584.1	38851.2	14129.5	33819.7	11851.9	10474.9		532.5	58302.8	58379.5	35077.9	45946.5	22644.9		131.5	6002.86	6148.69	6148.69	5510.91		140.5	6014.13	5861.02
86.4	8550.99	6672.2	2671.79	6672.2	2671.79		285.4	38910.1	38210.1	15515	31962.5	11630.1	10448.7		532.4	61416.6	63166.3	36739	49027.9	22600.7		131.4	6123.27	6057.4	6057.4	5506.11		140.4	6049.17	5857.85
86.3	7442.21	5299.16	2652.86	5299.16	2652.86		285.3	38502.2	37283.2	17301.1	29398.2	11429.3	10422.7		532.3	65203.3	67333.6	38480.4	51405.1	22551.8		131.3	6396.56	5973.54	5973.54	5502		140.3	5926.41	5854.73
86.2	6426.71	4304.43	2637.48	4304.43	2637.48		285.2	36513.2	36440	19537.1	26448.4	11248.8	10397.1		532.2	68184	70556.8	40272.4	52783.3	22498.8		131.2	5935.03	5897.36	5897.36	5498.14		140.2	5980.86	5853.06
86.1	5977.88	3627.12	2624.93	3627.12	2624.93		285.1	36202.4	36016.5	22248.6	23424.1	11087.7	10371.9		532.1	71405.4	72611.6	42078.3	52975.3	22442		131.1	6060.32	5829.15	5829.15	5494.48		140.1	5742.27	5851.32
86	5460.74	3190.57	2614.54	3190.57	2614.54		285	36173.3	36248.1	25423.7	20573.9	10944.7	10347.1		532	73047.6	73421.1	43855.1	51948.2	22382.2		131	5817.56	5769.03	5769.03	5491.16		140	6028.32	5849.73
85.9	4884.44	2922.75	2605.89	2922.75	2605.89		284.9	36932.2	37231.6	28997.5	18060.9	10818	10322.4		531.9	73357.2	73066.9	45555.2	49832.4	22320.7		130.9	5840.11	5716.79	5716.79	5488.24		139.9	5997.38	5847.6
85.8	4503.65	2765.27	2598.32	2765.27	2598.32		284.8	37787.9	38914.7	32840.2	15963.1	10705.5	10297		531.8	71905.8	71756.6	47127.2	46887.8	22258.3		130.8	6072.51	5671.41	5671.41	5485.14		139.8	6069.33	5845.43
85.7	4556.74	2675.99	2591.71	2675.99	2591.71		284.7	39762.6	41107.6	36752.2	14291.2	10604.8	10270.3		531.7	71250.1	69767.1	48519.5	43444.1	22196.5		130.7	6055.59	5632.81	5632.81	5482.36		139.7	5985.57	5842.28
85.6	4353.71	2626.64	2585.85	2626.63	2585.85		284.6	43325.8	43513.4	40471.8	13011.1	10514	10241.8		531.6	68571.4	67379.6	49682.5	39833.5	22136.4		130.6	5799.46	5599.74	5599.74	5479.29		139.6	6009.2	5838.54
85.5	4160.61	2599.37	2580.45	2599.36	2580.44		284.5	45995.7	45772.2	43699	12064.3	10431.3	10211.2		531.5	66228.9	64830.2	50571.5	36337.2	22078.5		130.5	6035.35	5572.13	5572.13	5476.53		139.5	6181.67	5834.26
85.4	4111.74	2583.85	2575.44	2583.82	2575.41		284.4	47451.6	47516.8	46134.2	11384.1	10355.4	10178.5		531.4	64144.4	62284.8	51150.4	33157.7	22023.4		130.4	5575.65	5549.46	5549.46	5474.23		139.4	6132.05	5830
85.3	3844.9	2574.58	2570.99	2574.48	2570.89		284.3	49158.8	48431.8	47527.3	10907	10285.2	10143.9		531.3	60755.9	59835.6	51394.5	30412.6	21971.5		130.3	5701.62	5530.79	5530.79	5472.1		139.3	6045.7	5825.17
85.2	3667.56	2568.56	2567.09	2568.27	2566.8		284.2	49783	48307.9	47725.5	10578.3	10220.4	10108.1		531.2	57686.2	57513.7	51291.7	28144.9	21922.9		130.2	5912.94	5515.29	5515.29	5469.87		139.2	6130.54	5820.4
85.1	3623.91	2564.33	2563.76	2563.54	2562.97		284.1	49077.4	47074.6	46704	10354.4	10161	10072.4		531.1	55545.9	55309.1	50844.5	26342.5	21877.8		130.1	5861.97	5502.88	5502.88	5468.03		139.1	5967.19	5816.04
85	3713.81	2561.67	2561.46	2559.59	2559.38		284	45828	44805.7	44571.4	10202.5	10107.2	10037.8		531	51748	53190.7	50068.8	24957.9	21835.9		130	5725.61	5492.57	5492.57	5466.05		139	6047.99	5811.54
84.9	3679.56	2561.19	2561.12	2555.98	2555.9		283.9	41570.3	41695.4	41547.5	10099	10059.4	10005.2		530.9	50946.9	51122.4	48993.5	23926	21797		129.9	5672.11	5483.73	5483.73	5463.71		138.9	6153.26	5807.9
84.8	3640.88	2564.83	2564.8	2552.34	2552.31		283.8	37598.4	38013.8	37919.9	10027.7	10017.8	9975.8		530.8	48791.2	49074.2	47657.5	23177.3	21760.6		129.8	5975.5	5476.64	5476.64	5461.66		138.8	5780.63	5804.18
84.7	3844.08	2577.24	2577.24	2548.63	2548.62		283.7	33151.2	34054.6	33994.3	9978.03	9982.36	9950.01		530.7	47754.6	47028.6	46108.3	22647	21726.6		129.7	5679.94	5471.2	5471.2	5460.07		138.7	6138.43	5801.34
84.6	3768.21	2607.38	2607.38	2544.72	2544.72		283.6	29437.5	30089.9	30050.4	9942.84	9952.89	9928.11		530.6	45397.1	44981	44397	22278.6	21694.7		129.6	5480.97	5466.78	5466.78	5458.58		138.6	5699.97	5799.74
84.5	4040.96	2671.66	2671.66	2540.52	2540.52		283.5	24933.8	26338.6	26312.2	9917.41	9928.73	9909.87		530.5	43477.4	42939	42577	22026.8	21664.9		129.5	5646.18	5463.36	5463.36	5457.38		138.5	5688.03	5799.49
84.4	4167.33	2798.13	2798.13	2535.77	2535.77		283.4	21931	22953.2	22935.1	9898.81	9909.33	9895.05		530.4	42108.4	40918.8	40699.6	21856.4	21637.2		129.4	5439.51	5460.87	5460.87	5456.53		138.4	5759.86	5798.55
84.3	4544.58	3031.78	3031.78	2530.27	2530.27		283.3	19226.4	20019.2	20006.6	9884.98	9893.89	9883.15		530.3	40366.3	38942.2	38812.5	21741.3	21611.7		129.3	5690.15	5458.8	5458.8	5455.68		138.3	5978.66	5798.81
84.2	5071.08	3439.23	3439.23	2523.75	2523.75		283.2	17489.9	17565.4	17556.5	9874.64	9881.81	9873.78		530.2	38917.5	37032.4	36957.4	21663.3	21588.3		129.2	5678.21	5456.95	5456.95	5454.73		138.2	5866.22	5799.07
84.1	5439.48	4110.19	4110.19	2515.79	2515.79		283.1	15881.1	15577.3	15570.9	9866.73	9872.3	9866.33		530.1	36633.1	35211.4	35169.1	21609.2	21566.9		129.1	5552.83	5454.97	5454.97	5453.4		138.1	6056.3	5799.34
84	6419.32	5151.16	5151.16	2505.67	2505.67		283	14628.3	14012.4	14007.8	9860.58	9864.82	9860.41		530	35662.8	33498.8	33475.4	21570.9	21547.5		129	5945.43	5452.47	5452.47	5451.36		138	5821.98	5799.6
83.9	7738.07	6665.82	6665.82	2492.53	2492.53		282.9	13740.2	12813.2	12809.9	9855.75	9858.92	9855.68		529.9	33610.1	31909.2	31896.6	21542.7	21530.1		128.9	5982.73	5450.15	5450.15	5449.38		137.9	6030.4	5799.87
83.8	9536.87	8716.68	8716.68	2475.53	2475.53		282.8	12820.3	11916.9	11914.5	9851.94	9854.27	9851.9		529.8	32545.8	30452.8	30446.2	21521.2	21514.6		128.8	5639.98	5447.7	5447.7	5447.17		137.8	5678.94	5800.13
83.7	11475.5	11268.5	11268.5	2453.4	2453.4		282.7	12345.2	11262.7	11261	9848.85	9850.55	9848.83		529.7	31310.1	29134.7	29131.3	21504.1	21500.6		128.7	5853	5445.38	5445.38	5445.02		137.7	5982.8	5800.39
83.6	13912	14129.1	14129.1	2424.69	2424.69		282.6	12122.2	10795.8	10794.6	9846.27	9847.5	9846.26		529.6	30149.1	27956.1	27954.4	21490.3	21488.6		128.6	5490.66	5443.26	5443.26	5443.01		137.6	6202.26	5800.66
83.5	17320.6	16922.2	16922.2	2389.14	2389.14		282.5	11948.6	10469.7	10468.8	9844.1	9844.99	9844.1		529.5	28033.5	26914	26913.2	21479	21478.2		128.5	5822.17	5441.68	5441.68	5441.51		137.5	5888.64	5800.92
83.4	19050.9	19135.4	19135.4	2346.89	2346.89		282.4	11539.9	10246.7	10246.1	9842.24	9842.88	9842.24		529.4	27202.9	26002.5	26002.1	21469.7	21469.3		128.4	5574.17	5440.17	5440.17	5440.06		137.4	5790.92	5801.19
83.3	20554.2	20267.7	20267.7	2299.29	2299.29		282.3	11168.7	10097.3	10096.9	9840.71	9841.15	9840.71		529.3	26315.1	25213.6	25213.4	21462	21461.8		128.3	5601.19	5439.09	5439.09	5439.01		137.3	5995.75	5801.45
83.2	20236.8	20027.3	20027.3	2248.91	2248.91		282.2	10645.6	9999.21	9998.9	9839.42	9839.74	9839.42		529.2	25305.1	24537.5	24537.4	21455.9	21455.8		128.2	5523	5437.53	5437.53	5437.49		137.2	5973.72	5801.72
83.1	18322.5	18466.4	18466.4	2198.97	2198.97		282.1	10751.8	9935.99	9935.76	9838.33	9838.55	9838.33		529.1	24447.2	23963.3	23963.3	21450.8	21450.8		128.1	5863.66	5436.35	5436.35	5436.32		137.1	6095.02	5801.98
83	16361.3	15955.9	15955.9	2151.96	2151.96		282	10912.6	9895.94	9895.79	9837.37	9837.52	9837.37		529	24299.6	23480.2	23480.2	21446.6	21446.6		128	5536.07	5434.99	5434.99	5434.96		137	5919.61	5802.24
82.9	13951.1	13022.6	13022.6	2110.38	2110.38		281.9	10855.2	9870.98	9870.87	9836.49	9836.6	9836.49		528.9	23476.1	23077.3	23077.2	21443.1	21443.1		127.9	5709.75	5433.9	5433.9	5433.89		136.9	5666.62	5802.51
82.8	11236.6	10153.9	10153.9	2075.26	2075.26		281.8	10706.1	9855.57	9855.5	9835.64	9835.72	9835.64		528.8	23661.6	22743.9	22743.9	21440.2	21440.2		127.8	5377.57	5432.58	5432.58	5432.57		136.8	5959.23	5802.77
82.7	9284.95	7676.32	7676.32	2046.47	2046.47		281.7	10491.5	9846.13	9846.08	9834.82	9834.87	9834.82		528.7	23233.7	22470.2	22470.2	21437.4	21437.4		127.7	5712.13	5431.52	5431.52	5431.52		136.7	5801.8	5803.04
82.6	7562.77	5732.98	5732.98	2023.51	2023.51		281.6	10598.7	9840.44	9840.4	9834.14	9834.18	9834.14		528.6	23602.3	22247.4	22247.4	21434.9	21434.9		127.6	5646.46	5430.3	5430.3	5430.3		136.6	5824.31	5805.72
82.5	6507.63	4324.48	4324.48	2005.39	2005.39		281.5	10146.6	9837.03	9837	9833.59	9833.61	9833.59		528.5	23025	22067.5	22067.5	21432.7	21432.7		127.5	5660.92	5428.88	5428.88	5428.88		136.5	5763.21	5808.41
82.4	5741.59	3370.22	3370.22	1990.91	1990.91		281.4	10186.4	9834.93	9834.91	9833.08	9833.1	9833.08		528.4	22392.4	21923.3	21923.3	21430.9	21430.9		127.4	5862.25	5427.08	5427.08	5427.08		136.4	5845.17	5811.09
82.3	5079.98	2761.15	2761.15	1979.24	1979.24		281.3	10450.2	9833.59	9833.58	9832.62	9832.63	9832.62		528.3	22286.5	21808.6	21808.6	21429.3	21429.3		127.3	5674.57	5425.59	5425.59	5425.59		136.3	5916.87	5813.78
82.2	4529.42	2392.69	2392.69	1969.67	1969.67		281.2	10239.7	9832.75	9832.74	9832.24	9832.25	9832.24		528.2	22423.3	21718.2	21718.2	21427.9	21427.9		127.2	5454.87	5424.31	5424.31	5424.31		136.2	5916.5	5816.47
82.1	3994.76	2180.31	2180.31	1961.73	1961.73		281.1	10143.7	9832.09	9832.09	9831.84	9831.84	9831.84		528.1	22339.2	21647.3	21647.3	21426.7	21426.7		127.1	5477.11	5423.15	5423.15	5423.15		136.1	5915.02	5819.15
82	3748.06	2063	2063	1955.07	1955.07		281	10310.2	9831.56	9831.56	9831.43	9831.44	9831.43		528	22762.7	21592	21592	21425.5	21425.5		127	5561.98	5422.57	5422.57	5422.57		136	6074.64	5821.84
81.9	3563.46	2000.34	2000.34	1949.39	1949.39		280.9	10179.1	9831.14	9831.14	9831.08	9831.08	9831.08		527.9	22017.1	21549.2	21549.2	21424.4	21424.4		126.9	5396.12	5422.38	5422.38	5422.38		135.9	5899.16	5824.52
81.8	3404.65	1967.41	1967.41	1944.43	1944.43		280.8	10169.6	9830.76	9830.76	9830.73	9830.73	9830.73		527.8	21981.1	21516.3	21516.3	21423.4	21423.4		126.8	5374.1	5422.32	5422.32	5422.32		135.8	5656.53	5827.21
81.7	3318.65	1949.99	1949.99	1940.08	1940.08		280.7	10231	9830.48	9830.48	9830.46	9830.46	9830.46		527.7	21859.3	21491.3	21491.3	21422.6	21422.6		126.7	5340.54	5422.1	5422.1	5422.1		135.7	5995.05	5829.89
81.6	2936.63	1940.41	1940.41	1936.32	1936.32		280.6	9683.79	9830.31	9830.31	9830.3	9830.3	9830.3		527.6	21787.7	21472.3	21472.3	21421.9	21421.9		126.6	5611.89	5421.84	5421.84	5421.84		135.6	6247.39	5832.58
81.5	2751.38	1934.72	1934.72	1933.11	1933.11		280.5	9744.87	9830.2	9830.2	9830.19	9830.19	9830.19		527.5	22332.2	21458	21458	21421.2	21421.2		126.5	5585.53	5421.41	5421.41	5421.41		135.5	5966.47	5835.27
81.4	2620	1931.08	1931.08	1930.48	1930.48		280.4	9906.06	9830.11	9830.11	9830.11	9830.11	9830.11		527.4	21832.9	21447.2	21447.2	21420.6	21420.6		126.4	5531.14	5420.78	5420.78	5420.78		135.4	5916.13	5837.95
81.3	2430.26	1928.52	1928.52	1928.3	1928.3		280.3	10024.2	9830.05	9830.05	9830.05	9830.05	9830.05		527.3	21888.8	21439.1	21439.1	21419.9	21419.9		126.3	5530.04	5419.96	5419.96	5419.96		135.3	6124.65	5840.64
81.2	2537.98	1926.38	1926.38	1926.31	1926.31		280.2	10114	9829.91	9829.91	9829.91	9829.91	9829.91		527.2	21816.6	21432.9	21432.9	21419.2	21419.2		126.2	5492.21	5419.43	5419.43	5419.43		135.2	5820.05	5843.32
81.1	2632.26	1924.51	1924.51	1924.49	1924.49		280.1	10125.5	9829.71	9829.71	9829.71	9829.71	9829.71		527.1	22238.6	21428.3	21428.3	21418.5	21418.5		126.1	5370.16	5419.14	5419.14	5419.14		135.1	5869.55	5846.01
81	2439.47	1922.85	1922.85	1922.84	1922.84		280	10010	9829.53	9829.53	9829.53	9829.53	9829.53		527	21908.2	21424.7	21424.7	21417.8	21417.8		126	5404.83	5418.82	5418.82	5418.82		135	6105.93	5848.7
80.9	2335.5	1921.36	1921.36	1921.36	1921.36		279.9	9841.65	9829.36	9829.36	9829.36	9829.36	9829.36		526.9	22092.7	21421.8	21421.8	21417	21417		125.9	5541.81	5418.6	5418.6	5418.6		134.9	6055.43	5851.38
80.8	2139.11	1920.05	1920.05	1920.05	1920.05		279.8	10002.6	9829.26	9829.26	9829.26	9829.26	9829.26		526.8	22203.1	21419.6	21419.6	21416.2	21416.2		125.8	5456.1	5418.16	5418.16	5418.16		134.8	5726.24	5854.07
80.7	2244.49	1919.05	1919.05	1919.05	1919.05		279.7	9657.19	9829.22	9829.22	9829.22	9829.22	9829.22		526.7	21743.4	21417.8	21417.8	21415.5	21415.5		125.7	5665.41	5417.28	5417.28	5417.28		134.7	6047.51	5856.75
80.6	2118.83	1918.17	1918.17	1918.17	1918.17		279.6	9860.69	9829.19	9829.19	9829.19	9829.19	9829.19		526.6	22105.8	21416.4	21416.4	21414.8	21414.8		125.6	5712.8	5416.11	5416.11	5416.11		134.6	5728.37	5859.44
80.5	2211.13	1917.35	1917.35	1917.35	1917.35		279.5	9935.06	9829.17	9829.17	9829.17	9829.17	9829.17		526.5	21764.5	21415.3	21415.3	21414.2	21414.2		125.5	5628.78	5415.28	5415.28	5415.28		134.5	6057.67	5897.81
80.4	2248.1	1916.52	1916.52	1916.52	1916.52		279.4	9835.66	9829.13	9829.13	9829.13	9829.13	9829.13		526.4	21638.8	21414.4	21414.4	21413.7	21413.7		125.4	5270.89	5414.65	5414.65	5414.65		134.4	5737.42	5936.18
80.3	2152.29	1915.89	1915.89	1915.89	1915.89		279.3	10063.4	9829.1	9829.1	9829.1	9829.1	9829.1		526.3	21723.9	21413.7	21413.7	21413.2	21413.2		125.3	5294.9	5414.43	5414.43	5414.43		134.3	6202.32	5974.56
80.2	1901.01	1915.41	1915.41	1915.41	1915.41		279.2	9606.79	9829.07	9829.07	9829.07	9829.07	9829.07		526.2	21897.7	21413.1	21413.1	21412.8	21412.8		125.2	5337.67	5419.91	5419.91	5419.91		134.2	6247.69	6012.93
80.1	1872.84	1915.16	1915.16	1915.16	1915.16		279.1	9752.91	9829.06	9829.06	9829.06	9829.06	9829.06		526.1	21636.6	21412.6	21412.6	21412.4	21412.4		125.1	5539.9	5425.38	5425.38	5425.38		134.1	6048.75	6051.3
80	1826.67	1915.1	1915.1	1915.1	1915.1		279	9893.15	9893.15	0	0	0	0		526	21725	21412.3	21412.3	21412.1	21412.1		125	5827.38	5430.86	5430.86	5430.86		134	6021.49	6089.67
79.9	1916.95	1918.88	1918.88	1918.88	1918.88										525.9	21163.2	21412	21412	21411.9	21411.9		124.9	5576.72	5436.34	5436.34	5436.34		133.9	6194.17	6128.04
79.8	2058.03	1922.66	1922.66	1922.66	1922.66										525.8	21509.2	21411.9	21411.9	21411.8	21411.8		124.8	5499.91	5441.82	5441.82	5441.82		133.8	6168.57	6196.59
79.7	1982.72	1926.45	1926.45	1926.45	1926.45										525.7	21434.7	21411.8	21411.8	21411.8	21411.8		124.7	5175.28	5447.29	5447.29	5447.29		133.7	6207.23	6265.14
79.6	1968.93	1930.23	1930.23	1930.23	1930.23										525.6	21280.6	21464.6	21464.6	21464.6	21464.6		124.6	5692.96	5452.77	5452.77	5452.77		133.6	6399.17	6333.7
79.5	1912.52	1934.01	1934.01	1934.01	1934.01										525.5	21671.3	21517.4	21517.4	21517.4	21517.4		124.5	5381.97	5466.78	5466.78	5466.78		133.5	6661.25	6402.25
79.4	1852.77	1939.49	1939.49	1939.49	1939.49										525.4	21472.6	21573.8	21573.8	21573.8	21573.8		124.4	5513.74	5480.79	5480.79	5480.79		133.4	6656.5	6470.8
79.3	1953.11	1944.96	1944.96	1944.96	1944.96										525.3	21728	21630.2	21630.2	21630.2	21630.2		124.3	5596.13	5494.79	5494.79	5494.79		133.3	6531	6539.35
79.2	2061.45	1955.78	1955.78	1955.78	1955.78										525.2	21859.2	21686.6	21686.6	21686.6	21686.6		124.2	5538.96	5508.8	5508.8	5508.8		133.2	6691.13	6607.9
79.1	1994.24	1979.46	1979.46	1979.46	1979.46										525.1	21982.1	21813.9	21813.9	21813.9	21813.9		124.1	5415.38	5522.81	5522.81	5522.81		133.1	6601.97	6676.45
79	1909.04	1909.04	0	0	0										525	21686.4	21686.4	0	0	0		124	5540.76	5540.76	0	0		133	6881.69	0

## Sheet: Fig. 2m XPS after Pb exposure
Fig. 2m Description: High-resolution XPS spectra of O 1s, C 1s, Pb 4f, P 2p and Au 4f after Pb²⁺ exposure. Sample: 13 nm SPR+BP-COOH after Pb²⁺ exposure X-axis: Binding energy (eV) Y-axis: Intensity (a.u.) Data included: Binding energy, raw intensity, fitted envelope, fitted component intensities, and baseline. Notes: For each fitted XPS region, the available source data include Binding energy (e…
Au 4f after Pb²⁺ exposure							C 1s after Pb²⁺ exposure								O 1s after Pb²⁺ exposure								P 2p after Pb²⁺ exposure						Pb 4f after Pb²⁺ exposure
Binding energy (eV)	Raw intensity (a.u.)	Fitted envelope (a.u.)	Au 4f₇/₂ component (a.u.)	Au 4f₅/₂ component (a.u.)	Baseline (a.u.)		Binding energy (eV)	Raw intensity (a.u.)	Fitted envelope (a.u.)	C–C component (a.u.)	C–O component (a.u.)	O=C–O component (a.u.)	Baseline (a.u.)		Binding energy (eV)	Raw intensity (a.u.)	Fitted envelope (a.u.)	O=C–O component (a.u.)	Pb–O-related component (a.u.)	P–O component (a.u.)	Baseline (a.u.)		Binding energy (eV)	Raw intensity (a.u.)	Fitted envelope (a.u.)	P–O component (a.u.)	Baseline (a.u.)		Binding energy (eV)	Raw intensity (a.u.)	Fitted envelope (a.u.)	Pb 4f₇/₂ component (a.u.)	Pb 4f₅/₂ component (a.u.)	Baseline (a.u.)
99	18910.1	18910.1	0	0	0		298	30756.8	30756.8	0	0	0	0		545	54429.1	54429.1	0	0	0	0		150	29013.2	28026.1	6000	6000		153	29006.5	29006.5	0	0	0
98.9	18696.3	18503.1	18503.1	18503.1	18503.1		297.9	30850	30869.1	30869.1	30869.1	30869.1	30869.1		544.9	53704.5	53926.2	53926.2	53926.2	53926.2	53926.2		149.9	28553.5	28063.5	28063.5	28063.5		152.9	29385.7	29157.6	29157.6	29157.6	29157.6
98.8	18052.8	18487.3	18487.3	18487.3	18487.3		297.8	30496	30831.9	30831.9	30831.9	30831.9	30831.9		544.8	54001.7	53865.9	53865.9	53865.9	53865.9	53865.9		149.8	28957.9	28048.9	28048.9	28048.9		152.8	28855.4	29147.4	29147.4	29147.4	29147.4
98.7	18353.1	18461.2	18461.2	18461.2	18461.2		297.7	31373.7	30812.7	30812.7	30812.7	30812.7	30812.7		544.7	53569.7	53713.7	53713.7	53713.7	53713.7	53713.7		149.7	28981.8	28032.9	28032.9	28032.9		152.7	29382.7	29110.4	29110.4	29110.4	29110.4
98.6	18615	18403.8	18403.8	18403.8	18403.8		297.6	30684.7	30810	30810	30810	30810	30810		544.6	53888.9	53582.4	53582.4	53582.4	53582.4	53582.4		149.6	28697.7	28027.5	28027.5	28027.5		152.6	29797.9	29053.3	29053.3	29053.3	29053.3
98.5	18353.1	18335.3	18335.3	18335.3	18335.3		297.5	30672.8	30807.9	30807.9	30807.9	30807.9	30807.9		544.5	52835.3	53356	53356	53356	53356	53356		149.5	28639.1	28026.2	28026.2	28026.2		152.5	29766.2	29014.5	29014.5	29014.5	29014.5
98.4	18130.2	18218.9	18218.9	18218.9	18218.9		297.4	30822.9	30782.5	30782.5	30782.5	30782.5	30782.5		544.4	53428.4	53233.8	53233.8	53233.8	53233.8	53233.8		149.4	28760.5	28022.3	28022.3	28022.3		152.4	28571.4	28970.4	28970.4	28970.4	28970.4
98.3	17688.5	18038.8	18038.8	18038.8	18038.8		297.3	30898.3	30765.3	30765.3	30765.3	30765.3	30765.3		544.3	53057.9	53033.4	53033.4	53033.4	53033.4	53033.4		149.3	28907	28011.3	28011.3	28011.3		152.3	28831.6	28931.2	28931.2	28931.2	28931.2
98.2	17772	17880.6	17880.6	17880.6	17880.6		297.2	31081.3	30735.8	30735.8	30735.8	30735.8	30735.8		544.2	52958.4	53020.2	53020.2	53020.2	53020.2	53020.2		149.2	28725.4	27995.2	27995.2	27995.2		152.2	29033.2	28923.3	28923.3	28923.3	28923.3
98.1	17632.8	17570.8	17570.8	17570.8	17570.8		297.1	30814.6	30682.7	30682.7	30682.7	30682.7	30682.7		544.1	52887.1	52881.9	52881.9	52881.9	52881.9	52881.9		149.1	29035.2	27978.5	27978.5	27978.5		152.1	28684.6	28922.9	28922.9	28922.9	28922.9
98	17557.4	17562.4	17562.4	17562.4	17562.4		297	30965	30649.8	30649.8	30649.8	30649.8	30649.8		544	52929.9	52799.3	52799.3	52799.3	52799.3	52799.3		149	28938.5	27952.8	27952.8	27952.8		152	29495.7	28914.4	28914.4	28914.4	28914.4
97.9	17203.1	17476.1	17476.1	17476.1	17476.1		296.9	30193.7	30601.1	30601.1	30601.1	30601.1	30601.1		543.9	52657.2	52623	52623	52623	52623	52623		148.9	28869.8	27926.2	27926.2	27926.2		151.9	29183.7	28893.2	28893.2	28893.2	28893.2
97.8	17917.8	17382.8	17382.8	17382.8	17382.8		296.8	31041.1	30557.8	30557.8	30557.8	30557.8	30557.8		543.8	52717.9	52417.2	52417.2	52417.2	52417.2	52417.2		148.8	28932	27896.8	27896.8	27896.8		151.8	29772.3	28871.7	28871.7	28871.7	28871.7
97.7	17349.2	17265.8	17265.8	17265.8	17265.8		296.7	30762.7	30539.7	30539.7	30539.7	30539.7	30539.7		543.7	52087.1	52178.6	52178.6	52178.6	52178.6	52178.6		148.7	29128.7	27866.1	27866.1	27866.1		151.7	28959.5	28849.4	28849.4	28849.4	28849.4
97.6	17246.1	17168	17168	17168	17168		296.6	30154.1	30536.9	30536.9	30536.9	30536.9	30536.9		543.6	51945	52118.8	52118.8	52118.8	52118.8	52118.8		148.6	28853	27824.3	27824.3	27824.3		151.6	28638	28832.1	28832.1	28832.1	28832.1
97.5	16892.9	17033.6	17033.6	17033.6	17033.6		296.5	30546.7	30516.4	30516.4	30516.4	30516.4	30516.4		543.5	51486	52028.4	52028.4	52028.4	52028.4	52028.4		148.5	28746.2	27793.8	27793.8	27793.8		151.5	29012.1	28816.6	28816.6	28816.6	28816.6
97.4	16882.7	16963.8	16963.8	16963.8	16963.8		296.4	30814.7	30495.8	30495.8	30495.8	30495.8	30495.8		543.4	52358	51899	51899	51899	51899	51899		148.4	28660.2	27766	27766	27766		151.4	28958.5	28813.2	28813.2	28813.2	28813.2
97.3	17046.3	16952.1	16952.1	16952.1	16952.1		296.3	30914.1	30466.2	30466.2	30466.2	30466.2	30466.2		543.3	52265.9	51760.7	51760.7	51760.7	51760.7	51760.7		148.3	29085.5	27756.7	27756.7	27756.7		151.3	28777.2	28812.4	28812.4	28812.4	28812.4
97.2	16750.9	16865	16865	16865	16865		296.2	30971.5	30410.6	30410.6	30410.6	30410.6	30410.6		543.2	51440.2	51700.2	51700.2	51700.2	51700.2	51700.2		148.2	29224	27748.7	27748.7	27748.7		151.2	28737.5	28809	28809	28809	28809
97.1	17310.2	16792.7	16792.7	16792.7	16792.7		296.1	30966.1	30345.6	30345.6	30345.6	30345.6	30345.6		543.1	51253.6	51681.3	51681.3	51681.3	51681.3	51681.3		148.1	28521.1	27748.3	27748.3	27748.3		151.1	28836.3	28803.1	28803.1	28803.1	28803.1
97	16476.9	16677.6	16677.6	16677.6	16677.6		296	30631.4	30273.4	30273.4	30273.4	30273.4	30273.4		543	51183.1	51295.8	51295.8	51295.8	51295.8	51295.8		148	28840.1	27747.2	27747.2	27747.2		151	29186	28803.1	28803.1	28803.1	28803.1
96.9	16635.4	16572.5	16572.5	16572.5	16572.5		295.9	30771	30212.6	30212.6	30212.6	30212.6	30212.6		542.9	52290.6	51125.4	51125.4	51125.4	51125.4	51125.4		147.9	28536.9	27746.4	27746.4	27746.4		150.9	28478.3	28800.7	28800.7	28800.7	28800.7
96.8	16513.1	16408.2	16408.2	16408.2	16408.2		295.8	30152.8	30154.8	30154.8	30154.8	30154.8	30154.8		542.8	50323.4	51001.3	51001.3	51001.3	51001.3	51001.3		147.8	28552.8	27741.6	27741.6	27741.6		150.8	29053.7	28799.3	28799.3	28799.3	28799.3
96.7	16385	16349.4	16349.4	16349.4	16349.4		295.7	30574	30099	30099	30099	30099	30099		542.7	50585.3	50989.3	50989.3	50989.3	50989.3	50989.3		147.7	29115.6	27737.4	27737.4	27737.4		150.7	28606.2	28797.5	28797.5	28797.5	28797.5
96.6	16223.8	16251.1	16251.1	16251.1	16251.1		295.6	30627.2	30039.1	30039.1	30039.1	30039.1	30039.1		542.6	50624	50662.7	50662.7	50662.7	50662.7	50662.7		147.6	28791.5	27732	27732	27732		150.6	28877.2	28797	28797	28797	28797
96.5	16262	16113	16113	16113	16113		295.5	30537.2	30009.9	30009.9	30009.9	30009.9	30009.9		542.5	51155.5	50653.9	50653.9	50653.9	50653.9	50653.9		147.5	29165.9	27724	27724	27724		150.5	28972.1	28792.3	28792.3	28792.3	28792.3
96.4	16189.7	15996.8	15996.8	15996.8	15996.8		295.4	29346.7	29980.5	29980.5	29980.5	29980.5	29980.5		542.4	50625.4	50578.9	50578.9	50578.9	50578.9	50578.9		147.4	28310.8	27714.8	27714.8	27714.8		150.4	28984	28788	28788	28788	28788
96.3	15674.9	15890.1	15890.1	15890.1	15890.1		295.3	30034.7	29959.4	29959.4	29959.4	29959.4	29959.4		542.3	50882	50454.7	50454.7	50454.7	50454.7	50454.7		147.3	28546.4	27704.9	27704.9	27704.9		150.3	28973.7	28776.3	28776.3	28776.3	28776.3
96.2	15672.1	15717.6	15717.6	15717.6	15717.6		295.2	30135	29954.3	29954.3	29954.3	29954.3	29954.3		542.2	50686.3	50332.4	50332.4	50332.4	50332.4	50332.4		147.2	28531.7	27695.1	27695.1	27695.1		150.2	29516.5	28761.6	28761.6	28761.6	28761.6
96.1	15802.5	15556.9	15556.9	15556.9	15556.9		295.1	29928.8	29951.9	29951.9	29951.9	29951.9	29951.9		542.1	49993.7	50219.2	50219.2	50219.2	50219.2	50219.2		147.1	28673.5	27684.5	27684.5	27684.5		150.1	29180.5	28746	28746	28746	28746
96	15432	15534.6	15534.6	15534.6	15534.6		295	30326.6	29927.3	29927.3	29927.3	29927.3	29927.3		542	50463.2	50082.1	50082.1	50082.1	50082.1	50082.1		147	28298.3	27675.4	27675.4	27675.4		150	29013.2	28733.3	28733.3	28733.3	28733.3
95.9	15203.1	15523.7	15523.7	15523.7	15523.7		294.9	30360.4	29901	29901	29901	29901	29901		541.9	50327.2	50003.2	50003.2	50003.2	50003.2	50003.2		146.9	28573	27668.3	27668.3	27668.3		149.9	28553.5	28720.3	28720.3	28720.3	28720.3
95.8	15563	15413.5	15413.5	15413.5	15413.5		294.8	29977.6	29868.8	29868.8	29868.8	29868.8	29868.8		541.8	49635	49933.3	49933.3	49933.3	49933.3	49933.3		146.8	29471	27661.7	27661.7	27661.7		149.8	28957.9	28711	28711	28711	28711
95.7	15747.5	15344	15344	15344	15344		294.7	30273	29833.1	29833.1	29833.1	29833.1	29833.1		541.7	50197.1	49835.8	49835.8	49835.8	49835.8	49835.8		146.7	28701.3	27655.5	27655.5	27655.5		149.7	28981.8	28705.2	28705.2	28705.2	28705.2
95.6	15246	15274.4	15274.4	15274.4	15274.4		294.6	29920.6	29793.9	29793.9	29793.9	29793.9	29793.9		541.6	49930.9	49748.3	49748.3	49748.3	49748.3	49748.3		146.6	28563.1	27652.4	27652.4	27652.4		149.6	28697.7	28702.2	28702.2	28702.2	28702.2
95.5	15058.1	15166	15166	15166	15166		294.5	30310.3	29758.9	29758.9	29758.9	29758.9	29758.9		541.5	49904.8	49720.3	49720.3	49720.3	49720.3	49720.3		146.5	28140.8	27650.9	27650.9	27650.9		149.5	28639.1	28697.3	28697.3	28697.3	28697.3
95.4	14830.5	14944.3	14944.3	14944.3	14944.3		294.4	29964.6	29728	29728	29728	29728	29728		541.4	49297.4	49670.8	49670.8	49670.8	49670.8	49670.8		146.4	28624	27647.7	27647.7	27647.7		149.4	28760.5	28692.7	28692.7	28692.7	28692.7
95.3	15103.8	14770.6	14770.6	14770.6	14770.6		294.3	29601.1	29696.2	29696.2	29696.2	29696.2	29696.2		541.3	49698.1	49616.1	49616.1	49616.1	49616.1	49616.1		146.3	28845.5	27643.8	27643.8	27643.8		149.3	28907	28689.9	28689.9	28689.9	28689.9
95.2	14607.7	14681.4	14681.4	14681.4	14681.4		294.2	30157.6	29653.9	29653.9	29653.9	29653.9	29653.9		541.2	50006.1	49580.9	49580.9	49580.9	49580.9	49580.9		146.2	28902.6	27639.1	27639.1	27639.1		149.2	28725.4	28684.2	28684.2	28684.2	28684.2
95.1	14328.2	14675.3	14675.3	14675.3	14675.3		294.1	30256.3	29610.1	29610.1	29610.1	29610.1	29610.1		541.1	49466.9	49546.2	49546.2	49546.2	49546.2	49546.2		146.1	29041.3	27631.3	27631.3	27631.3		149.1	29035.2	28675.9	28675.9	28675.9	28675.9
95	14536.9	14649.6	14649.6	14649.6	14649.6		294	30178	29567.6	29567.6	29567.6	29567.6	29567.6		541	49722.1	49505.2	49505.2	49505.2	49505.2	49505.2		146	28586.8	27624.3	27624.3	27624.3		149	28938.5	28666.4	28666.4	28666.4	28666.4
94.9	14933.9	14599.8	14599.8	14599.8	14599.8		293.9	29693.3	29504.2	29504.2	29504.2	29504.2	29504.2		540.9	49195.5	49475.2	49475.2	49475.2	49475.2	49475.2		145.9	28181.2	27617.2	27617.2	27617.2		148.9	28869.8	28656.3	28656.3	28656.3	28656.3
94.8	15155.3	14496.4	14496.4	14496.4	14496.4		293.8	30401.2	29442	29442	29442	29442	29442		540.8	49397.1	49460.4	49460.4	49460.4	49460.4	49460.4		145.8	28739.3	27611.4	27611.4	27611.4		148.8	28932	28642.6	28642.6	28642.6	28642.6
94.7	14859.7	14382.1	14382.1	14382.1	14382.1		293.7	29811.2	29390.9	29390.9	29390.9	29390.9	29390.9		540.7	49711.5	49424.6	49424.6	49424.6	49424.6	49424.6		145.7	29045.3	27608.3	27608.3	27608.3		148.7	29128.7	28629.8	28629.8	28629.8	28629.8
94.6	13925.3	14248.5	14248.5	14248.5	14248.5		293.6	29453.2	29344.8	29344.8	29344.8	29344.8	29344.8		540.6	49618.1	49419.1	49419.1	49419.1	49419.1	49419.1		145.6	28414.8	27607.5	27607.5	27607.5		148.6	28853	28618.1	28618.1	28618.1	28618.1
94.5	14197.6	14124.8	14124.8	14124.8	14124.8		293.5	29720.8	29310.4	29310.4	29310.4	29310.4	29310.4		540.5	49200.9	49372.8	49372.8	49372.8	49372.8	49372.8		145.5	28677.3	27605.1	27605.1	27605.1		148.5	28746.2	28607.6	28607.6	28607.6	28607.6
94.4	14241.8	14072.2	14072.2	14072.2	14072.2		293.4	28928.8	29289.2	29289.2	29289.2	29289.2	29289.2		540.4	49486.1	49344.6	49344.6	49344.6	49344.6	49344.6		145.4	28674.8	27602.1	27602.1	27602.1		148.4	28660.2	28595.5	28595.5	28595.5	28595.5
94.3	13898.5	14067.4	14067.4	14067.4	14067.4		293.3	29622.5	29279.5	29279.5	29279.5	29279.5	29279.5		540.3	48977.1	49312.5	49312.5	49312.5	49312.5	49312.5		145.3	28811.2	27596.9	27596.9	27596.9		148.3	29085.5	28582.2	28582.2	28582.2	28582.2
94.2	14097.8	14043.5	14043.5	14043.5	14043.5		293.2	29171.2	29273.1	29273.1	29273.1	29273.1	29273.1		540.2	49548.5	49249.9	49249.9	49249.9	49249.9	49249.9		145.2	28291.9	27591	27591	27591		148.2	29224	28571.1	28571.1	28571.1	28571.1
94.1	14454.6	14025.3	14025.3	14025.3	14025.3		293.1	29255.5	29273.1	29273.1	29273.1	29273.1	29273.1		540.1	49674.9	49126.4	49126.4	49126.4	49126.4	49126.4		145.1	29383.4	27584.5	27584.5	27584.5		148.1	28521.1	28558.8	28558.8	28558.8	28558.8
94	13853.8	14010.4	14010.4	14010.4	14010.4		293	29387.7	29268.3	29268.3	29268.3	29268.3	29268.3		540	49415.9	49067.5	49067.5	49067.5	49067.5	49067.5		145	28533.8	27575.5	27575.5	27575.5		148	28840.1	28547	28547	28547	28547
93.9	13992.6	13979.1	13979.1	13979.1	13979.1		292.9	30085.5	29263.6	29263.6	29263.6	29263.6	29263.6		539.9	48327.4	48944.4	48944.4	48944.4	48944.4	48944.4		144.9	28630	27567.6	27567.6	27567.6		147.9	28536.9	28539.1	28539.1	28539.1	28539.1
93.8	14286.9	13934.9	13934.9	13934.9	13934.9		292.8	29608.7	29258.2	29258.2	29258.2	29258.2	29258.2		539.8	49268.3	48834.3	48834.3	48834.3	48834.3	48834.3		144.8	28046.1	27561	27561	27561		147.8	28552.8	28531.8	28531.8	28531.8	28531.8
93.7	14306.8	13896	13896	13896	13896		292.7	29299.5	29252.4	29252.4	29252.4	29252.4	29252.4		539.7	48904.2	48798.5	48798.5	48798.5	48798.5	48798.5		144.7	28461.1	27552.4	27552.4	27552.4		147.7	29115.6	28522.1	28522.1	28522.1	28522.1
93.6	14031.8	13833.5	13833.5	13833.5	13833.5		292.6	29331.3	29245.3	29245.3	29245.3	29245.3	29245.3		539.6	48547.5	48796	48796	48796	48796	48796		144.6	28810.5	27542.5	27542.5	27542.5		147.6	28791.5	28509.3	28509.3	28509.3	28509.3
93.5	14372	13763.8	13763.8	13763.8	13763.8		292.5	29664.6	29240.9	29240.9	29240.9	29240.9	29240.9		539.5	48945.2	48763.2	48763.2	48763.2	48763.2	48763.2		144.5	29336.5	27533.9	27533.9	27533.9		147.5	29165.9	28498	28498	28498	28498
93.4	13900.2	13687	13687	13687	13687		292.4	29417	29237.7	29237.7	29237.7	29237.7	29237.7		539.4	48732.3	48741.4	48741.4	48741.4	48741.4	48741.4		144.4	28974.1	27525.6	27525.6	27525.6		147.4	28310.8	28486.3	28486.3	28486.3	28486.3
93.3	14155.4	13611.5	13611.5	13611.5	13611.5		292.3	29282.4	29235.9	29235.9	29235.9	29235.9	29235.9		539.3	48937.9	48720.3	48720.3	48720.3	48720.3	48720.3		144.3	28949.8	27519.6	27519.6	27519.6		147.3	28546.4	28478.9	28478.9	28478.9	28478.9
93.2	13889	13526.8	13526.8	13526.8	13526.8		292.2	28927.7	29232.8	29232.8	29232.8	29232.8	29232.8		539.2	48768	48689.1	48689.1	48689.1	48689.1	48689.1		144.2	28836.2	27515.7	27515.7	27515.7		147.2	28531.7	28472.1	28472.1	28472.1	28472.1
93.1	13959.3	13440.7	13440.7	13440.7	13440.7		292.1	29647.2	29231.4	29231.4	29231.4	29231.4	29231.4		539.1	48575	48651	48651	48651	48651	48651		144.1	29020.4	27515.4	27515.4	27515.4		147.1	28673.5	28471.8	28471.8	28471.8	28471.8
93	14016.3	13349	13349	13349	13349		292	29228.5	29230.9	29230.9	29230.9	29230.9	29230.9		539	48882.1	48602.1	48602.1	48602.1	48602.1	48602.1		144	29513.7	27515.4	27515.4	27515.4		147	28298.3	28471.1	28471.1	28471.1	28471.1
92.9	13677.2	13267.3	13267.3	13267.3	13267.3		291.9	29203.5	29230.2	29230.2	29230.2	29230.2	29230.2		538.9	48705.2	48556.7	48556.7	48556.7	48556.7	48556.7		143.9	29653.2	27515	27515	27515		146.9	28573	28469.3	28469.3	28469.3	28469.3
92.8	13424.3	13191.1	13191.1	13191.1	13191.1		291.8	29330.9	29228.5	29228.5	29228.5	29228.5	29228.5		538.8	48662.8	48519.7	48519.7	48519.7	48519.7	48519.7		143.8	30474.7	27511.3	27511.3	27511.3		146.8	29471	28467.2	28467.2	28467.2	28467.2
92.7	13341.6	13116.2	13116.2	13116.2	13116.2		291.7	29156.2	29228.4	29228.4	29228.4	29228.4	29228.4		538.7	48439.2	48472.2	48472.2	48472.2	48472.2	48472.2		143.7	31406.8	27505.3	27505.3	27505.3		146.7	28701.3	28465.3	28465.3	28465.3	28465.3
92.6	13577.1	13056.4	13056.4	13056.4	13056.4		291.6	29223.2	29227.7	29227.7	29227.7	29227.7	29227.7		538.6	48569.2	48471.6	48471.6	48471.6	48471.6	48471.6		143.6	31589.9	27496.3	27496.3	27496.3		146.6	28563.1	28463.6	28463.6	28463.6	28463.6
92.5	13203.3	13008.6	13008.6	13008.6	13008.6		291.5	29557	29226.7	29226.7	29226.7	29226.7	29226.7		538.5	47984.6	48470.4	48470.4	48470.4	48470.4	48470.4		143.5	31810.7	27485.9	27485.9	27485.9		146.5	28140.8	28461.8	28461.7	28461.8	28461.7
92.4	13027.3	12962.5	12962.5	12962.5	12962.5		291.4	29346.3	29225.8	29225.8	29225.8	29225.8	29225.8		538.4	48718.6	48451.8	48451.8	48451.8	48451.8	48451.8		143.4	32346.5	27475.9	27475.9	27475.9		146.4	28624	28460.8	28460.6	28460.8	28460.6
92.3	13153.1	12909.9	12909.9	12909.9	12909.9		291.3	29279.6	29224.4	29224.4	29224.4	29224.4	29224.4		538.3	49465.3	48422.2	48422.2	48422.2	48422.2	48422.2		143.3	32591.1	27466.8	27466.8	27466.8		146.3	28845.5	28459.6	28459.3	28459.6	28459.3
92.2	13346.6	12867.4	12867.4	12867.4	12867.4		291.2	29380.7	29222	29222	29222	29222	29222		538.2	48868.8	48404.3	48404.3	48404.3	48404.3	48404.3		143.2	32816.2	27457.5	27457.5	27457.5		146.2	28902.6	28457.9	28457.4	28457.9	28457.4
92.1	13030.9	12830.7	12830.7	12830.7	12830.7		291.1	29711.7	29220.1	29220	29220	29220.1	29220		538.1	47880.4	48375.9	48375.9	48375.9	48375.9	48375.9		143.1	32469.5	27446.7	27446.7	27446.7		146.1	29041.3	28455.8	28454.9	28455.8	28454.9
92	12838.5	12797.1	12797.1	12797.1	12797.1		291	29314.6	29218.2	29218.1	29218.1	29218.2	29218.1		538	48388.9	48351.4	48351.4	48351.4	48351.4	48351.4		143	32705.9	27436.9	27436.9	27436.9		146	28586.8	28454.3	28452.9	28454.3	28452.9
91.9	12770.1	12763.2	12763.2	12763.2	12763.2		290.9	29338	29216.4	29216.3	29216.3	29216.4	29216.3		537.9	48411.8	48345.7	48345.7	48345.7	48345.7	48345.7		142.9	32711.8	27425.2	27425.2	27425.2		145.9	28181.2	28453.4	28451	28453.4	28451
91.8	13025.6	12743.6	12743.6	12743.6	12743.6		290.8	29211.3	29214.5	29214.4	29214.4	29214.5	29214.4		537.8	48469.2	48345.1	48345.1	48345.1	48345.1	48345.1		142.8	32252.4	27414	27414	27414		145.8	28739.3	28452.7	28449	28452.7	28449
91.7	12754.5	12736.8	12736.8	12736.8	12736.8		290.7	29399.6	29212.8	29212.6	29212.6	29212.8	29212.6		537.7	48578.3	48328.5	48328.5	48328.5	48328.5	48328.5		142.7	32476.8	27401.1	27401.1	27401.1		145.7	29045.3	28453.4	28447.7	28453.4	28447.7
91.6	12538.2	12736.8	12736.8	12736.8	12736.8		290.6	29661.7	29210.6	29210.3	29210.3	29210.6	29210.3		537.6	48875.9	48300.4	48300.4	48300.4	48300.4	48300.4		142.6	31693.3	27390.5	27390.5	27390.5		145.6	28414.8	28455.1	28446.2	28455.1	28446.2
91.5	12595.6	12734.4	12734.4	12734.4	12734.4		290.5	29583.9	29207.6	29207	29207	29207.6	29207		537.5	49035.4	48272.4	48272.4	48272.4	48272.4	48272.4		142.5	31399.9	27380.2	27380.2	27380.2		145.5	28677.3	28457.7	28444.2	28457.7	28444.2
91.4	12892.5	12729.4	12729.4	12729.4	12729.4		290.4	29746.2	29202.8	29201.9	29201.9	29202.8	29201.9		537.4	48270.8	48246.7	48246.7	48246.7	48246.7	48246.7		142.4	30212.1	27370.2	27370.2	27370.2		145.4	28674.8	28462.4	28442	28462.4	28442
91.3	13146.3	12728.1	12728.1	12728.1	12728.1		290.3	30144.6	29198.1	29196.6	29196.6	29198.1	29196.6		537.3	48194.5	48223.2	48223.2	48223.2	48223.2	48223.2		142.3	30505.5	27360.6	27360.6	27360.6		145.3	28811.2	28471	28440.7	28471	28440.7
91.2	12474.4	12726.8	12726.8	12726.8	12726.8		290.2	29404.2	29192.8	29190.4	29190.4	29192.8	29190.4		537.2	48316.6	48207.6	48207.6	48207.6	48207.6	48207.6		142.2	30037.1	27350.6	27350.6	27350.6		145.2	28291.9	28482.5	28438.3	28482.5	28438.3
91.1	12586.4	12725.1	12725.1	12725.1	12725.1		290.1	30115.2	29187.1	29183.5	29183.5	29187.1	29183.5		537.1	48269.3	48205.5	48205.5	48205.5	48205.5	48205.5		142.1	30292	27342.5	27342.5	27342.5		145.1	29383.4	28499.9	28436	28499.9	28436
91	13081.5	12723.4	12723.4	12723.4	12723.4		290	29901.3	29182.8	29177.3	29177.3	29182.8	29177.3		537	48117	48203	48203	48203	48203	48203		142	30226.6	27335.5	27335.5	27335.5		145	28533.8	28524.9	28433.8	28524.9	28433.8
90.9	12963.9	12721.7	12721.7	12721.7	12721.7		289.9	29355	29181.3	29173	29173	29181.3	29173		536.9	48286.3	48201.1	48201.1	48201.1	48201.1	48201.1		141.9	29566.9	27329.4	27329.4	27329.4		144.9	28630	28560.6	28432.4	28560.6	28432.4
90.8	13097.4	12719.6	12719.6	12719.6	12719.6		289.8	29230.7	29182.2	29169.9	29169.9	29182.2	29169.9		536.8	48146.3	48199.8	48199.8	48199.8	48199.8	48199.8		141.8	29197.8	27324.8	27324.8	27324.8		144.8	28046.1	28608.9	28430.8	28608.9	28430.8
90.7	13081.9	12717.1	12717.1	12717.1	12717.1		289.7	28748.1	29186.8	29168.7	29168.7	29186.8	29168.7		536.7	48266.2	48199.7	48199.7	48199.7	48199.7	48199.7		141.7	28575.6	27324.7	27324.7	27324.7		144.7	28461.1	28673.8	28429.9	28673.8	28429.9
90.6	13016.5	12714.7	12714.7	12714.7	12714.7		289.6	29225.1	29195	29168.6	29168.6	29195	29168.6		536.6	48183.2	48199.5	48199.5	48199.5	48199.5	48199.5		141.6	29147	27324.5	27324.5	27324.5		144.6	28810.5	28757.7	28428	28757.7	28428
90.5	13070.7	12712.1	12712.1	12712.1	12712.1		289.5	29284.4	29206.3	29168.6	29168.6	29206.3	29168.6		536.5	48658	48199.2	48199.2	48199.2	48199.2	48199.2		141.5	28703.9	27324.3	27324.3	27324.3		144.5	29336.5	28865.1	28425.7	28865.1	28425.7
90.4	13169.9	12709.6	12709.6	12709.6	12709.6		289.4	29886.6	29221.9	29168.4	29168.4	29221.9	29168.4		536.4	48397.9	48198.9	48198.9	48198.9	48198.9	48198.9		141.4	28874.7	27323.8	27323.8	27323.8		144.4	28974.1	28999.7	28422.3	28999.7	28422.3
90.3	12918.9	12707	12707	12707	12707		289.3	29926.3	29243	29168.1	29168.2	29243	29168.1		536.3	48157.2	48198.7	48198.7	48198.7	48198.7	48198.7		141.3	28382.7	27323.3	27323.3	27323.3		144.3	28949.8	29166.3	28418.4	29166.3	28418.4
90.2	13294.1	12703.9	12703.9	12703.9	12703.9		289.2	29859.5	29271.2	29167.7	29167.8	29271.1	29167.7		536.2	48017.5	48198.6	48198.6	48198.6	48198.6	48198.6		141.2	27815	27322.6	27322.6	27322.6		144.2	28836.2	29368.8	28414.3	29368.8	28414.3
90.1	13638.7	12700.5	12700.5	12700.5	12700.5		289.1	30474.1	29308.4	29167.2	29167.4	29308.2	29167.2		536.1	47961.3	48198.5	48198.4	48198.4	48198.5	48198.4		141.1	28476.5	27321.8	27321.8	27321.8		144.1	29020.4	29609.7	28409.9	29609.7	28409.9
90	13543.3	12696.6	12696.6	12696.6	12696.6		289	30554.5	29356.8	29166.6	29166.9	29356.4	29166.6		536	48681.1	48198.4	48198.3	48198.3	48198.4	48198.3		141	27904.8	27321.2	27321.2	27321.2		144	29513.7	29889.2	28404.6	29889.2	28404.6
89.9	13902.6	12692.1	12692.1	12692.1	12692.1		288.9	30613.8	29418.8	29165.8	29166.5	29418.1	29165.8		535.9	48381.8	48198.1	48197.9	48197.9	48198.1	48197.9		140.9	28777.2	27320.7	27320.7	27320.7		143.9	29653.2	30204.5	28397.5	30204.5	28397.5
89.8	13891.8	12687	12687	12687	12687		288.8	31197.8	29497	29164.9	29166	29495.8	29164.9		535.8	48904.8	48197.5	48197.2	48197.2	48197.5	48197.2		140.8	28597.8	27320.1	27320.1	27320.1		143.8	30474.7	30549.5	28387.3	30549.5	28387.3
89.7	14048.7	12681.8	12681.8	12681.8	12681.8		288.7	31572.5	29594.1	29163.8	29165.9	29592.1	29163.8		535.7	49205.5	48196.8	48196.2	48196.2	48196.8	48196.2		140.7	27910.5	27319.5	27319.5	27319.5		143.7	31406.8	30915.6	28373.9	30915.6	28373.9
89.6	13842.8	12676.4	12676.4	12676.4	12676.4		288.6	31458.5	29712.6	29162.6	29166.1	29709.1	29162.6		535.6	48877.1	48196.4	48195.3	48195.3	48196.3	48195.3		140.6	28147.8	27318.9	27318.9	27318.9		143.6	31589.9	31290.3	28357.7	31290.3	28357.7
89.5	13771.9	12670.7	12670.7	12670.7	12670.7		288.5	32003.1	29854.7	29161.3	29167.1	29848.9	29161.3		535.5	48602.1	48196.2	48194.3	48194.3	48196.2	48194.3		140.5	28374	27318.2	27318.2	27318.2		143.5	31810.7	31656.6	28338.2	31656.6	28338.2
89.4	14323.6	12664.7	12664.6	12664.7	12664.6		288.4	31858.1	30022	29159.9	29169.5	30012.3	29159.9		535.4	48505.4	48197	48193.6	48193.6	48196.9	48193.6		140.4	28144.3	27317.5	27317.5	27317.5		143.4	32346.5	31995.6	28316	31995.6	28316
89.3	14481.5	12658.3	12658.2	12658.3	12658.2		288.3	32164.7	30215.1	29158.4	29174.1	30199.4	29158.4		535.3	47910.7	48199	48193.2	48193.1	48198.9	48193.1		140.3	28454	27316.9	27316.9	27316.9		143.3	32591.1	32287.2	28292.1	32287.2	28292.1
89.2	14553.3	12651.5	12651	12651.5	12651		288.2	32070.5	30433.3	29156.8	29182	30408	29156.8		535.2	48504.3	48202.6	48192.7	48192.6	48202.3	48192.5		140.2	28351.8	27316.3	27316.3	27316.3		143.2	32816.2	32511.2	28266.9	32511.2	28266.9
89.1	14894.3	12644.4	12643.2	12644.4	12643.2		288.1	32429.5	30674.4	29155	29194.9	30634.5	29155		535.1	49033.4	48208.6	48192.2	48191.9	48208.1	48191.8		140.1	28786.2	27315.6	27315.6	27315.6		143.1	32469.5	32650.2	28240.5	32650.2	28240.5
89	14699.2	12638.3	12635.1	12638.3	12635.1		288	33175.1	30935	29153.3	29215.4	30872.9	29153.3		535	49124.3	48218.5	48191.7	48191.2	48217.6	48191		140	28353.9	27314.8	27314.8	27314.8		143	32705.9	32692.5	28213.6	32692.5	28213.6
88.9	14782.3	12634.8	12626.6	12634.8	12626.6		287.9	32345.9	31209.8	29151.4	29246.6	31114.6	29151.4		534.9	48860.3	48234.3	48191.3	48190.5	48232.7	48190.1		139.9	28216.6	27314.3	27314.3	27314.3		142.9	32711.8	32633.4	28186.9	32633.4	28186.9
88.8	14971.9	12637.8	12617.7	12637.8	12617.7		287.8	32675.9	31492.8	29149.5	29293.1	31349.3	29149.5		534.8	48341.2	48258.8	48191.2	48189.7	48256	48189.1		139.8	28049.5	27313.8	27313.8	27313.7		142.8	32252.4	32475.6	28160.4	32475.6	28160.4
88.7	15206.4	12655.3	12608.1	12655.3	12608.1		287.7	32918.1	31778.2	29147.6	29360.8	31564.9	29147.5		534.7	48701.3	48295.9	48191.8	48189	48291	48188		139.7	28473.1	27313.3	27313.3	27313.3		142.7	32476.8	32229.5	28134.8	32229.5	28134.8
88.6	15841.4	12703.4	12597.3	12703.4	12597.3		287.6	32961.4	32061.1	29145.6	29457.4	31749.2	29145.5		534.6	49321.6	48350.9	48193.6	48188.5	48342.6	48186.9		139.6	28871.7	27312.9	27312.9	27312.8		142.6	31693.3	31911.6	28110.5	31911.6	28110.5
88.5	16561.3	12814	12585.1	12814	12585.1		287.5	33467.7	32339.1	29143.6	29592.2	31890.1	29143.4		534.5	49188.1	48430.5	48197.2	48188.2	48416.5	48185.7		139.5	28577.7	27312.3	27312.3	27312.2		142.5	31399.9	31543.3	28089.2	31543.3	28089.2
88.4	16775.5	13044	12571.1	13044	12571.1		287.4	33320.9	32614.1	29141.5	29776.9	31978	29141.1		534.4	49167.6	48542.9	48203.5	48188	48519.7	48184.2		139.4	29070.8	27311.5	27311.5	27311.4		142.4	30212.1	31144.6	28069.8	31144.6	28069.8
88.3	17729.2	13491.3	12554.6	13491.3	12554.6		287.3	33999.6	32893.2	29139.4	30024.9	32006.4	29138.8		534.3	49397.4	48698.4	48214.3	48188.3	48660.6	48182.4		139.3	28895.3	27310.8	27310.8	27310.6		142.3	30505.5	30736.9	28053.2	30736.9	28053.2
88.2	19092.8	14312.9	12535	14312.9	12535		287.2	33888.1	33189.4	29137.6	30351.3	31973.2	29136.3		534.2	49686	48909.1	48232.3	48189.3	48848.4	48180.5		139.2	29601	27309.9	27309.9	27309.7		142.2	30037.1	30336.6	28038.2	30336.6	28038.2
88.1	20462.7	15743.5	12511.5	15743.5	12511.5		287.1	33588.5	33521.1	29136.2	30772	31880.6	29133.8		534.1	49867.3	49188	48261.1	48191.4	49092	48178.2		139.1	30032	27309.3	27309.3	27308.9		142.1	30292	29957.7	28024.5	29957.7	28024.5
88	22506.8	18105.4	12482.4	18105.4	12482.4		287	34098.5	33910.4	29135.6	31302.2	31734.9	29131.2		534	50275	49548.8	48305.7	48194.9	49399.2	48175.5		139	30723.3	27308.8	27308.8	27308.3		142	30226.6	29609.6	28011.6	29609.5	28011.5
87.9	25461	21798.1	12445.3	21798.1	12445.3		286.9	34686.7	34380.9	29136.5	31955.4	31545.8	29128.4		533.9	50770.3	50004.9	48373.6	48200.9	49775.4	48172.5		138.9	30887	27308.3	27308.3	27307.7		141.9	29566.9	29299.3	28000.2	29299.2	28000.1
87.8	29934.9	27245.6	12397.8	27245.6	12397.8		286.8	35032.4	34954.1	29139.9	32740	31325.3	29125.5		533.8	50150.9	50566.9	48474.3	48209.9	50220.6	48169		138.8	31403.9	27307.7	27307.7	27306.9		141.8	29197.8	29029.9	27990.4	29029.7	27990.3
87.7	34989.2	34780.6	12335.3	34780.6	12335.3		286.7	35414.2	35645.1	29147.5	33656.7	31085.4	29122.2		533.7	51748.4	51242.3	48620.5	48223.3	50727.9	48164.7		138.7	32235.1	27307.1	27307.1	27306		141.7	28575.6	28801	27982	28800.7	27981.8
87.6	43570.4	44463.6	12253	44463.6	12253		286.6	36640.7	36459	29162.2	34695.9	30838.3	29118.8		533.6	52143.3	52032.9	48828.3	48242.6	51281.3	48159.7		138.6	32148	27306.5	27306.5	27305.1		141.6	29147	28611.1	27975.5	28610.7	27975.1
87.5	52854.9	55858	12146.3	55858	12146.3		286.5	36340.8	37386.9	29188.5	35833.9	30594.5	29115		533.5	53029.4	52934.7	49117.6	48269.8	51854.8	48153.8		138.5	33154.4	27306	27306	27304.2		141.5	28703.9	28456	27969.8	28455.4	27969.2
87.4	62847.2	67849.5	12010.2	67849.5	12010.2		286.4	37412.4	38404.7	29232.9	37031.4	30362.1	29110.8		533.4	53853.1	53937.7	49511.4	48307.1	52411.9	48146.3		138.4	34152.9	27305.7	27305.7	27303.4		141.4	28874.7	28331.9	27965.3	28330.9	27964.2
87.3	75281.3	78665.3	11841.4	78665.3	11841.4		286.3	38542.3	39472.9	29305.3	38232.8	30147.2	29106.2		533.3	55365.1	55029	50036.6	48357.9	52909.8	48137.6		138.3	33714.4	27305.5	27305.5	27302.6		141.3	28382.7	28234.5	27961.8	28232.8	27960.1
87.2	84832.5	86227.6	11643.1	86227.6	11643.1		286.2	39620	40540.8	29420	39369.4	29953.6	29101.1		533.2	55955.7	56195.5	50720.9	48426	53303.4	48127.4		138.2	34033.5	27305.5	27305.5	27301.8		141.2	27815	28159.6	27959.5	28156.8	27956.8
87.1	88818.7	88818.7	11422.1	88818.7	11422.1		286.1	40826.8	41553.1	29597.2	40363.8	29783	29095.5		533.1	57395	57428.8	51591.5	48515.8	53552.4	48115.5		138.1	33508.6	27305.3	27305.3	27300.6		141.1	28476.5	28103.4	27958.7	28099.2	27954.4
87	86947.9	85773.8	11189.2	85773.8	11189.2		286	41891	42461.5	29864.3	41140	29635.7	29089.2		533	59022.7	58729.2	52670.9	48632.6	53628.8	48101.6		138	33168.1	27305.3	27305.3	27299.3		141	27904.8	28062.1	27958.7	28055.5	27952.1
86.9	80425.9	77782.9	10959.1	77782.9	10959.1		285.9	42605.4	43236.1	30258	41632.3	29510.7	29082.5		532.9	60404.1	60106.2	53972.7	48782.4	53522.7	48085.7		137.9	33513.3	27305.6	27305.6	27298.1		140.9	28777.2	28032.4	27959.5	28022.4	27949.6
86.8	69943.5	66584.1	10744.7	66584.1	10744.7		285.8	43547.4	43878.3	30825.9	41796.7	29406.2	29075.3		532.8	61979.8	61574.4	55494.8	48971.2	53243.6	48067.6		137.8	32308.5	27306.4	27306.4	27296.9		140.8	28597.8	28012.6	27961.9	27997.6	27946.9
86.7	59268.1	54266.9	10555.3	54266.9	10555.3		285.7	43612.8	44428.8	31626.6	41617.6	29320	29067.7		532.7	63781.1	63145.6	57214.7	49206	52819.5	48047.3		137.7	32183.1	27307.8	27307.8	27295.8		140.7	27910.5	28001.6	27966.9	27979.4	27944.6
86.6	49103.3	42606.1	10395.5	42606.1	10395.5		285.6	44537.6	44971.1	32730.5	41110.5	29249.6	29059.7		532.6	64929.9	64816.8	59082.6	49493.1	52290	48024.5		137.6	31519	27310	27310	27295.1		140.6	28147.8	27998	27974.4	27965.2	27941.7
86.5	40149.9	32710.7	10265.4	32710.7	10265.4		285.5	45266.4	45626.8	34217.4	40319.8	29192.4	29051.4		532.5	67501.9	66559.6	61019.1	49838.4	51700.1	47999		137.5	31134.4	27312.9	27312.9	27294.3		140.5	28374	28002.8	27987	27955.3	27939.5
86.4	33600.7	25009.1	10161.3	25009.1	10161.3		285.4	45772.3	46543.7	36172.1	39311	29146.2	29042.8		532.4	69490	68313.7	62916.2	50246.8	51092.5	47970.9		137.4	30841.9	27316.7	27316.7	27293.6		140.4	28144.3	28016	28005.6	27947.9	27937.5
86.3	28961.3	19431.7	10078.8	19431.7	10078.8		285.3	46973	47878.5	38677	38160.2	29108.4	29033.5		532.3	70961.5	69988.3	64644.6	50720.9	50503.5	47940.3		137.3	30664.6	27321.5	27321.5	27293.1		140.3	28454	28038.1	28031.4	27941.8	27935
86.2	25230.9	15635.9	10012.9	15635.9	10012.9		285.2	49136.2	49774.7	41800.6	36944.2	29077.1	29023.6		532.2	72208.2	71471.5	66066.3	51261	49959.1	47907.5		137.2	29625.6	27327.7	27327.7	27292.7		140.2	28351.8	28070.9	28066.5	27936	27931.7
86.1	23114.9	13191.3	9959.35	13191.3	9959.35		285.1	50218.6	52338.4	45581.7	35731.8	29050.6	29012.8		532.1	72472.5	72647.7	67054.3	51863.3	49475.8	47872.9		137.1	29239.1	27335.2	27335.2	27292.3		140.1	28786.2	28117.5	28114.8	27931.1	27928.4
86	20593.1	11692.7	9914.86	11692.7	9914.86		285	53962.7	55614.1	50010.6	34577.9	29027.1	29000.8		532	73311.1	73418.4	67512.3	52519.7	49061	47837.3		137	29106.5	27344.2	27344.2	27291.9		140	28353.9	28181.2	28179.5	27926.7	27924.9
85.9	19283.8	10813.8	9877.1	10813.8	9877.1		284.9	57604.5	59562.3	55009.7	33521.6	29005.2	28987.1		531.9	73192.5	73720.6	67391.6	53216	48714.6	47800.8		136.9	28892.6	27354.7	27354.7	27291.1		139.9	28216.6	28266.3	28265.2	27923	27922
85.8	18323	10317.1	9844.15	10317	9844.14		284.8	61902.5	64043.2	60416.3	32586	28983.8	28971.5		531.8	73522.4	73538.1	66701.4	53932.9	48432.1	47764.1		136.8	28263	27367.3	27367.3	27290.4		139.8	28049.5	28376.6	28376	27919.5	27918.8
85.7	17586.1	10044.2	9815.34	10044.1	9815.3		284.7	66977.8	68809.8	65974.6	31780.7	28962	28953.7		531.7	72728.4	72901.8	65506	54645.2	48205.8	47727.6		136.7	28701.7	27382.4	27382.4	27289.6		139.7	28473.1	28517.1	28516.7	27916	27915.6
85.6	16561.8	9895.43	9789.3	9895.32	9789.19		284.6	70800.9	73518.3	71341.8	31104.6	28939	28933.5		531.6	71822.1	71881	63913.7	55323.4	48027.2	47691.7		136.6	28103.7	27400.3	27400.3	27288.9		139.6	28871.7	28692.5	28692.2	27912.3	27912
85.5	16229	9812.65	9765.46	9812.32	9765.14		284.5	76066.7	77757.2	76115.5	30549	28914.5	28910.9		531.5	71122.7	70567.2	62058	55935.4	47887.7	47656.9		136.5	28475.4	27421.3	27421.3	27288		139.5	28577.7	28906.9	28906.8	27907.6	27907.4
85.4	15953.3	9763.53	9743.42	9762.59	9742.48		284.4	80164	81098.7	79881.4	30101.1	28888.5	28886.1		531.4	68894.3	69056.6	60076.3	56448.3	47779.4	47623.7		136.4	28288.9	27446	27446	27287.2		139.4	29070.8	29164.5	29164.5	27901.9	27901.8
85.3	16037.6	9731.85	9723.63	9729.23	9721.01		284.3	82285.5	83163.4	82275.8	29745.6	28861	28859.5		531.3	68222.8	67436.7	58093.7	56832.2	47695.4	47592.4		136.3	28169.7	27474.8	27474.8	27286.5		139.3	28895.3	29468	29468	27894.8	27894.8
85.2	15623	9710.28	9707.06	9703.31	9700.1		284.2	83958.2	83687.2	83050.5	29467.4	28832.5	28831.6		531.2	65838.8	65777.1	56210.4	57062.9	47630	47563.1		136.2	27548.7	27508.1	27508.1	27285.6		139.2	29601	29818.3	29818.3	27886.4	27886.3
85.1	15598.9	9698.24	9697.03	9680.52	9679.32		284.1	82925.2	82570.4	82121	29252	28803.8	28803.2		531.1	64532.6	64128.1	54497.2	57124.5	47578.9	47536.3		136.18	27515.5	27546.5	27546.5	27284.8		139.1	30032	30212.5	30212.5	27875.3	27875.3
85	15915.7	9702.33	9701.89	9659.22	9658.79		284	80343.5	79896.2	79584	29087.1	28775.6	28775.3		531	62723.6	62521.6	52995.2	57011.3	47538.2	47511.6		136.08	27459.9	27590.5	27590.5	27284		139	30723.3	30645.8	30645.8	27862	27861.9
84.9	15450	9738.33	9738.18	9638	9637.85		283.9	75490.6	75910.6	75697.2	28961.7	28748.7	28748.5		530.9	61521	60976.7	51720.5	56729.1	47505.5	47489.2		135.98	27813.6	27640.8	27640.8	27283.1		138.9	30887	31107.9	31107.9	27845.6	27845.6
84.8	16572.5	9839.84	9839.79	9616.37	9616.32		283.8	71727.1	70973.8	70830.1	28867.3	28723.9	28723.7		530.8	60089.2	59504	50669.6	56293.4	47478.7	47468.8		135.88	27631.3	27697.6	27697.6	27282.1		138.8	31403.9	31584.8	31584.8	27825.9	27825.9
84.7	16442.1	10069.5	10069.5	9593.2	9593.18		283.7	64901.4	65493.9	65398.7	28796.5	28701.5	28701.4		530.7	58631.7	58109.8	49825.5	55729	47456.3	47450.5		135.78	27687.9	27761.5	27761.5	27281		138.7	32235.1	32058.8	32058.8	27803.6	27803.6
84.6	17975.5	10539.3	10539.3	9568.11	9568.1		283.6	59952.9	59865.5	59803.4	28743.9	28681.8	28681.8		530.6	57479.7	56799.1	49164	55066	47437.6	47434.2		135.68	27806.7	27832.9	27832.9	27279.6		138.6	32148	32507.5	32507.5	27778.3	27778.3
84.5	18816	11434	11434	9539.28	9539.28		283.5	54804.2	54422	54382.1	28704.9	28665	28665		530.5	55629	55576	48656.5	54337.1	47421.4	47419.5		135.58	27883	27912.4	27912.4	27278.1		138.5	33154.4	32905.4	32905.4	27749	27749
84.4	21136.7	13040.3	13040.3	9505.94	9505.94		283.4	49369.4	49410.4	49385.2	28676.3	28651.1	28651.1		530.4	56102.5	54445.2	48275.4	53575.2	47407.5	47406.5		135.48	27916.8	28000.4	28000.4	27276.5		138.4	34152.9	33229.1	33229.1	27716.7	27716.7
84.3	23438.4	15766.1	15766.1	9465.61	9465.61		283.3	44234.2	44985	44969.3	28655.4	28639.7	28639.7		530.3	54182.5	53410.5	47994.7	52810.2	47395.6	47395		135.38	28012.8	28096.8	28096.8	27274.5		138.3	33714.4	33456.7	33456.7	27682.1	27682.1
84.2	27123.1	20137	20137	9415.62	9415.62		283.2	41118.2	41216.7	41207.1	28640.3	28630.7	28630.7		530.2	53098.4	52474.3	47791.6	52067.2	47385.2	47384.8		135.28	28279.9	28202.3	28202.3	27272.5		138.2	34033.5	33571.2	33571.2	27645.6	27645.6
84.1	32772.5	26739.3	26739.3	9351.27	9351.27		283.1	38118.4	38109.9	38104.1	28629.4	28623.6	28623.6		530.1	52924.2	51637.5	47646.9	51366.1	47375.9	47375.7		135.18	27843.2	28316.6	28316.6	27270.4		138.1	33508.6	33563.4	33563.4	27609	27609
84	40871.1	36083.1	36083.1	9267.18	9267.18		283	36283.7	35622	35618.6	28621.6	28618.1	28618.1		530	52122.9	50899.3	47545.7	50721.5	47368.1	47368		135.08	28040.8	28439.7	28439.7	27268.2		138	33168.1	33432.3	33432.3	27572.9	27572.9
83.9	51446.1	48361.7	48361.7	9156.52	9156.52		282.9	35067.8	33682.4	33680.4	28615.6	28613.6	28613.6		529.9	51113	50256.4	47475.8	50141.9	47361.3	47361.3		134.98	28224.2	28571.1	28571.1	27265.9		137.9	33513.3	33185.4	33185.4	27538.3	27538.3
83.8	64288.8	63135.2	63135.2	9011.82	9011.82		282.8	34316.2	32207.5	32206.3	28611.2	28610.1	28610.1		529.8	50739.3	49703.6	47427.8	49631.1	47355.3	47355.2		134.88	28078.2	28710.4	28710.4	27263.6		137.8	32308.5	32837.8	32837.8	27505.8	27505.8
83.7	79417.8	79047.5	79047.5	8826.99	8826.99		282.7	32530.7	31112.1	31111.4	28607.8	28607.2	28607.2		529.7	50645.4	49234.7	47395.3	49189.5	47350.1	47350.1		134.78	28397.2	28856.1	28856.1	27260.7		137.7	32183.1	32410.3	32410.3	27475.5	27475.5
83.6	94394.2	93784.2	93784.2	8600.55	8600.55		282.6	31946.9	30316.5	30316.1	28605.2	28604.8	28604.8		529.6	49799.7	48842	47373.4	48814.3	47345.7	47345.7		134.68	28877	29007.3	29007.3	27257.3		137.6	31519	31926.8	31926.8	27447.4	27447.4
83.5	104582	104490	104490	8335.55	8335.55		282.5	31292.2	29751	29750.8	28603.1	28602.9	28602.9		529.5	49601.8	48517.1	47358.4	48500.4	47341.8	47341.8		134.58	28935.3	29162.4	29162.4	27253.4		137.5	31134.4	31412.9	31412.9	27422.4	27422.4
83.4	110251	108680	108680	8043.33	8043.33		282.4	31200.3	29357.4	29357.3	28601.4	28601.3	28601.3		529.4	49543.5	48251.8	47348.2	48241.9	47338.4	47338.4		134.48	29101.7	29319.6	29319.6	27248.9		137.4	30841.9	30890.8	30890.8	27399.2	27399.2
83.3	105306	105257	105257	7739.45	7739.45		282.3	30891.4	29088.8	29088.8	28600	28599.9	28599.9		529.3	48804.5	48037.6	47341	48031.9	47335.3	47335.3		134.38	29363.5	29477.1	29477.1	27243.8		137.3	30664.6	30381.7	30381.7	27379	27379
83.2	96199.1	95019.3	95019.3	7443.42	7443.42		282.2	30299.4	28909.2	28909.1	28598.7	28598.7	28598.7		529.2	49642.2	47866.9	47335.8	47863.6	47332.5	47332.5		134.28	29499.1	29632.6	29632.6	27238.1		137.2	29625.6	29901.2	29901.2	27361.4	27361.4
83.1	80821.4	80297.6	80297.6	7171.3	7171.3		282.1	30653.9	28791.2	28791.1	28597.6	28597.6	28597.6		529.1	48534.3	47732.3	47331.9	47730.4	47330	47330		134.18	29842	29783.7	29783.7	27231.8		137.1	29239.1	29460.6	29460.6	27346.1	27346.1
83	66153.2	63974.4	63974.4	6935.5	6935.5		282	30607.5	28715.2	28715.2	28596.6	28596.6	28596.6		529	48710.1	47627.3	47328.8	47626.3	47327.7	47327.7		134.08	30084.7	29927.8	29927.8	27224.9		137	29106.5	29066.9	29066.9	27333.1	27333.1
82.9	52665.3	48513.5	48513.5	6739.58	6739.58		281.9	29455.2	28667.1	28667.1	28595.8	28595.8	28595.8		528.9	48850.4	47546.4	47326.1	47545.8	47325.6	47325.6		133.98	30287	30062.1	30062.1	27217.3		136.9	28892.6	28723.7	28723.7	27322.9	27322.9
82.8	42346.8	35448.7	35448.7	6583.37	6583.37		281.8	29839.1	28637.1	28637.1	28595	28595	28595		528.8	48313.7	47484.8	47324.1	47484.5	47323.8	47323.8		133.88	30698.5	30184.2	30184.2	27209.1		136.8	28263	28429.6	28429.6	27313.7	27313.7
82.7	33696.7	25357	25357	6461.1	6461.1		281.7	29509	28618.8	28618.8	28594.3	28594.3	28594.3		528.7	48402.1	47438.1	47322	47437.9	47321.9	47321.9		133.78	30477.5	30291.5	30291.5	27200.5		136.7	28701.7	28182.5	28182.5	27305.9	27305.9
82.6	27459.6	18122.7	18122.7	6365.9	6365.9		281.6	29776.9	28607.7	28607.7	28593.8	28593.8	28593.8		528.6	48936	47403.2	47320.3	47403.1	47320.2	47320.2		133.68	30665.5	30381.6	30381.6	27191.4		136.6	28103.7	27978.3	27978.3	27298.7	27298.7
82.5	23598	13260.3	13260.3	6291.22	6291.22		281.5	29832.6	28601	28601	28593.2	28593.2	28593.2		528.5	47938.4	47377.3	47318.7	47377.3	47318.7	47318.7		133.58	30907.9	30452.5	30452.5	27182		136.5	28475.4	27812.2	27812.2	27292.3	27292.3
82.4	20390.8	10174.8	10174.8	6232.27	6232.27		281.4	29497.5	28596.9	28596.9	28592.6	28592.6	28592.6		528.4	48222	47358.3	47317.3	47358.2	47317.3	47317.3		133.48	30872.3	30502.5	30502.5	27172.5		136.4	28288.9	27678.6	27678.6	27285.9	27285.9
82.3	17590.5	8315.72	8315.72	6184.76	6184.76		281.3	29934.1	28594.3	28594.3	28592	28592	28592		528.3	47949.9	47344.1	47315.8	47344.1	47315.8	47315.8		133.38	30949.7	30530.2	30530.2	27162.7		136.3	28169.7	27573.8	27573.8	27280.9	27280.9
82.2	15697.8	7246.86	7246.86	6145.56	6145.56		281.2	29369	28592.7	28592.7	28591.5	28591.5	28591.5		528.2	48708.6	47333.9	47314.5	47333.9	47314.5	47314.5		133.28	30939.1	30534.9	30534.9	27152.8		136.2	27548.7	27492.2	27492.2	27276.4	27276.4
82.1	14332.7	6657.19	6657.19	6112.74	6112.74		281.1	29250.5	28591.7	28591.7	28591.1	28591.1	28591.1		528.1	47990.4	47326.5	47313.4	47326.5	47313.4	47313.4		133.18	30721.2	30516.5	30516.5	27143.1		136.18	27515.5	27430	27430	27273	27273
82	13526.1	6342.46	6342.46	6084.93	6084.93		281	28690.3	28591.1	28591.1	28590.8	28590.8	28590.8		528	47670.1	47320.9	47312.1	47320.9	47312	47312		133.08	30560.4	30475	30475	27133.4		136.08	27459.9	27383.1	27383.1	27270.3	27270.3
81.9	12469	6177.91	6177.91	6061.35	6061.35		280.9	28598.4	28590.7	28590.7	28590.6	28590.6	28590.6		527.9	48843.3	47316.6	47310.8	47316.6	47310.8	47310.8		132.98	30757.3	30411.3	30411.3	27123.9		135.98	27813.6	27347.6	27347.6	27267.5	27267.5
81.8	10906.3	6091.7	6091.7	6041.22	6041.22		280.8	28871.4	28590.5	28590.5	28590.4	28590.4	28590.4		527.8	47730.7	47313.6	47309.8	47313.6	47309.8	47309.8		132.88	30606.7	30326.9	30326.9	27114.6		135.88	27631.3	27321.2	27321.2	27265	27265
81.7	10242.3	6044.85	6044.85	6023.93	6023.93		280.7	28935	28590.4	28590.4	28590.3	28590.3	28590.3		527.7	47844.8	47311.4	47308.9	47311.4	47308.9	47308.9		132.78	30326.3	30223.4	30223.4	27105.8		135.78	27687.9	27301.2	27301.2	27262.2	27262.2
81.6	9817.61	6017.58	6017.58	6009.29	6009.29		280.6	28801	28590.2	28590.2	28590.2	28590.2	28590.2		527.6	47403.8	47309.5	47307.9	47309.5	47307.9	47307.9		132.68	30043.3	30103	30103	27097.2		135.68	27806.7	27285.7	27285.7	27259	27259
81.5	9347.5	5999.94	5999.94	5996.8	5996.8		280.5	28654.5	28590.1	28590.1	28590.1	28590.1	28590.1		527.5	48034.3	47308.5	47307.5	47308.5	47307.5	47307.5		132.58	29819.3	29968.3	29968.3	27089.5		135.58	27883	27273.8	27273.8	27255.8	27255.8
81.4	9067.4	5986.81	5986.81	5985.67	5985.67		280.4	28562.1	28590	28590	28590	28590	28590		527.4	47123.6	47307.7	47307.1	47307.7	47307.1	47307.1		132.48	29272.5	29821.9	29821.9	27082.3		135.48	27916.8	27265.1	27265.1	27253.1	27253.1
81.3	8728.23	5975.98	5975.98	5975.58	5975.58		280.3	29286	28589.9	28589.9	28589.9	28589.9	28589.9		527.3	47582.8	47307	47306.6	47307	47306.6	47306.6		132.38	29429.7	29666.5	29666.5	27075.8		135.38	28012.8	27257.8	27257.8	27249.8	27249.8
81.2	8583.72	5966.63	5966.63	5966.5	5966.5		280.2	28847.1	28589.7	28589.7	28589.7	28589.7	28589.7		527.2	47788	47306.4	47306.2	47306.4	47306.2	47306.2		132.28	29077.6	29504.6	29504.6	27070		135.28	28279.9	27252.1	27252.1	27246.9	27246.9
81.1	8210.18	5958.5	5958.5	5958.46	5958.46		280.1	29011.3	28589.6	28589.6	28589.6	28589.6	28589.6		527.1	47609.3	47305.8	47305.7	47305.8	47305.7	47305.7		132.18	28729	29338.9	29338.9	27064.7		135.18	27843.2	27247.6	27247.6	27244.3	27244.3
81	7686.79	5951.35	5951.35	5951.33	5951.33		280	28584.3	28589.4	28589.4	28589.4	28589.4	28589.4		527	48251.8	47305.2	47305.1	47305.2	47305.1	47305.1		132.08	28731.3	29171.7	29171.7	27059.9		135.08	28040.8	27243.5	27243.5	27241.3	27241.3
80.9	7617.53	5944.88	5944.88	5944.88	5944.88		279.9	28339.7	28589.4	28589.4	28589.4	28589.4	28589.4		526.9	47227.6	47304.5	47304.5	47304.5	47304.5	47304.5		131.98	28265.6	29005.3	29005.3	27055.7		134.98	28224.2	27239.7	27239.7	27238.4	27238.4
80.8	7658.74	5939.33	5939.33	5939.33	5939.33		279.8	28828.3	28589.3	28589.3	28589.3	28589.3	28589.3		526.8	47791.9	47304.1	47304.1	47304.1	47304.1	47304.1		131.88	28359.9	28841.7	28841.7	27052		134.88	28078.2	27236.4	27236.4	27235.5	27235.5
80.7	7137.24	5934.5	5934.5	5934.5	5934.5		279.7	28845	28589.2	28589.2	28589.2	28589.2	28589.2		526.7	47014.5	47303.8	47303.7	47303.8	47303.7	47303.7		131.78	28224.8	28682.3	28682.3	27048.4		134.78	28397.2	27233.3	27233.3	27232.8	27232.8
80.6	7069.67	5930.02	5930.02	5930.02	5930.02		279.6	28957.8	28589.2	28589.2	28589.2	28589.2	28589.2		526.6	47398.4	47326.7	47326.7	47326.7	47326.7	47326.7		131.68	28337.1	28528.7	28528.7	27045		134.68	28877	27230.4	27230.4	27230	27230
80.5	7126.3	5925.98	5925.98	5925.98	5925.98		279.5	28400.8	28589.1	28589.1	28589.1	28589.1	28589.1		526.5	47086.3	47349.6	47349.6	47349.6	47349.6	47349.6		131.58	28293	28382	28382	27041.8		134.58	28935.3	27228.1	27228.1	27227.9	27227.9
80.4	6921.61	5922.57	5922.57	5922.57	5922.57		279.4	28767.1	28589	28589	28589	28589	28589		526.4	47802.9	47372.6	47372.6	47372.6	47372.6	47372.6		131.48	28082	28243.1	28243.1	27038.7		134.48	29101.7	27226.4	27226.4	27226.3	27226.3
80.3	6647.35	5919.48	5919.48	5919.48	5919.48		279.3	28719.3	28589	28589	28589	28589	28589		526.3	48283.9	47395.5	47395.5	47395.5	47395.5	47395.5		131.38	27899.3	28112.9	28112.9	27036		134.38	29363.5	27225.7	27225.7	27225.6	27225.6
80.2	6631.43	5916.77	5916.77	5916.77	5916.77		279.2	28311.7	28589	28589	28589	28589	28589		526.2	47216	47418.5	47418.5	47418.5	47418.5	47418.5		131.28	27697.5	27991.6	27991.6	27033.4		134.28	29499.1	27225.4	27225.4	27225.3	27225.3
80.1	6473.25	5914.36	5914.36	5914.36	5914.36		279.1	28726.7	28589	28589	28589	28589	28589		526.1	47491.9	47441.5	47441.5	47441.5	47441.5	47441.5		131.18	28062.8	27879.4	27879.4	27030.9		134.18	29842	27235.1	27235.1	27235.1	27235.1
80	6647.14	5912.48	5912.48	5912.48	5912.48		279	28598.3	28598.3	0	0	0	0		526	48196.1	47464.4	47464.4	47464.4	47464.4	47464.4		131.08	27967.7	27776.4	27776.4	27028.6		134.08	30084.7	27244.9	27244.9	27244.9	27244.9
79.9	6088.57	5910.86	5910.86	5910.86	5910.86										525.9	47180.6	47487.4	47487.4	47487.4	47487.4	47487.4		130.98	27766.9	27682.4	27682.4	27026.3		133.98	30287	27254.6	27254.6	27254.6	27254.6
79.8	6225.89	5909.21	5909.21	5909.21	5909.21										525.8	47491.4	47510.3	47510.3	47510.3	47510.3	47510.3		130.88	27832.9	27596.9	27596.9	27024		133.88	30698.5	27264.4	27264.4	27264.4	27264.4
79.7	6681.2	5907.63	5907.63	5907.63	5907.63										525.7	47885.5	47533.3	47533.3	47533.3	47533.3	47533.3		130.78	27885.7	27519.8	27519.8	27021.7		133.78	30477.5	27274.1	27274.1	27274.1	27274.1
79.6	6342.6	5906.41	5906.41	5906.41	5906.41										525.6	48062.1	47556.2	47556.2	47556.2	47556.2	47556.2		130.68	27595.5	27450.5	27450.5	27019.3		133.68	30665.5	27283.9	27283.9	27283.9	27283.9
79.5	6092.38	5905.25	5905.25	5905.25	5905.25										525.5	47745.3	47579.2	47579.2	47579.2	47579.2	47579.2		130.58	27222.4	27388.4	27388.4	27016.8		133.58	30907.9	27293.7	27293.7	27293.7	27293.7
79.4	5988.65	5904.34	5904.34	5904.34	5904.34										525.4	47465.5	47602.1	47602.1	47602.1	47602.1	47602.1		130.48	27554.1	27332.9	27332.9	27014.1		133.48	30872.3	27303.4	27303.4	27303.4	27303.4
79.3	5834.25	5903.89	5903.89	5903.89	5903.89										525.3	47867.9	47625.1	47625.1	47625.1	47625.1	47625.1		130.38	27364.3	27283.8	27283.8	27011.3		133.38	30949.7	27313.2	27313.2	27313.2	27313.2
79.2	5958.14	5903.68	5903.68	5903.68	5903.68										525.2	48114.9	47648	47648	47648	47648	47648		130.28	27174.1	27240.2	27240.2	27008.4		133.28	30939.1	27328.1	27328.1	27328.1	27328.1
79.1	5994.78	5903.61	5903.61	5903.61	5903.61										525.1	46685.6	47671	47671	47671	47671	47671		130.18	27110.7	27201.8	27201.8	27005.4		133.18	30721.2	27492.4	27492.4	27492.4	27492.4
79	5827.27	5827.27	0	0	0										525	48015.6	48015.6	0	0	0	0		130.08	27255.4	27168.2	27168.2	27002.5		133.08	30560.4	27906.6	0	0	0

## Sheet: Fig.3a,b Reflectance simulation
Fig. 3a,b Description: Simulated angle-scanned reflectance curves of the Au-film SPR structure with and without a BP overlayer. Simulation method: Transfer matrix method Incident wavelength: 633 nm Structures: L = 0, bare-Au SPR L = 8, BP-modified SPR structure Refractive index range: nₛ = 1.330, 1.335, 1.340, 1.345 and 1.350 X-axis: Incident angle (deg) Y-axis: Reflectance (a.u.) Notes: L repres…
(a) L = 0							(a) L = 8
Incident angle (deg)	nₛ = 1.330, reflectance (a.u.)	nₛ = 1.335, reflectance (a.u.)	nₛ = 1.340, reflectance (a.u.)	nₛ = 1.345, reflectance (a.u.)	nₛ = 1.350, reflectance (a.u.)		Incident angle (deg)	nₛ = 1.330, reflectance (a.u.)	nₛ = 1.335, reflectance (a.u.)	nₛ = 1.340, reflectance (a.u.)	nₛ = 1.345, reflectance (a.u.)	nₛ = 1.350, reflectance (a.u.)
65	0.93005	0.93298	0.93443	0.93495	0.93486		65	0.934631	0.93443	0.934051	0.933532	0.932899
65.05	0.9296	0.93273	0.93431	0.9349	0.93487		65.05	0.93462	0.934441	0.93408	0.933576	0.932957
65.1	0.92914	0.93247	0.93417	0.93485	0.93487		65.1	0.934605	0.934449	0.934107	0.933619	0.933013
65.15	0.92864	0.93219	0.93403	0.9348	0.93488		65.15	0.934588	0.934456	0.934133	0.933661	0.933068
65.2	0.92813	0.93189	0.93387	0.93473	0.93487		65.2	0.934569	0.934461	0.934157	0.9337	0.933121
65.25	0.92758	0.93158	0.93371	0.93466	0.93486		65.25	0.934547	0.934463	0.934179	0.933738	0.933173
65.3	0.927	0.93125	0.93353	0.93458	0.93485		65.3	0.934522	0.934463	0.934199	0.933775	0.933223
65.35	0.9264	0.9309	0.93334	0.93449	0.93483		65.35	0.934494	0.934461	0.934217	0.93381	0.933272
65.4	0.92576	0.93053	0.93313	0.9344	0.9348		65.4	0.934464	0.934457	0.934234	0.933843	0.93332
65.45	0.92509	0.93014	0.93292	0.93429	0.93477		65.45	0.934431	0.93445	0.934248	0.933875	0.933366
65.5	0.92439	0.92973	0.93269	0.93418	0.93473		65.5	0.934395	0.934441	0.934261	0.933905	0.933411
65.55	0.92365	0.9293	0.93244	0.93405	0.93469		65.55	0.934356	0.93443	0.934271	0.933933	0.933454
65.6	0.92288	0.92884	0.93218	0.93392	0.93464		65.6	0.934314	0.934416	0.93428	0.93396	0.933496
65.65	0.92206	0.92836	0.93191	0.93378	0.93458		65.65	0.934269	0.9344	0.934287	0.933985	0.933536
65.7	0.92121	0.92786	0.93162	0.93362	0.93452		65.7	0.93422	0.934381	0.934291	0.934009	0.933575
65.75	0.92031	0.92733	0.93131	0.93346	0.93444		65.75	0.934169	0.93436	0.934294	0.93403	0.933612
65.8	0.91937	0.92677	0.93099	0.93328	0.93436		65.8	0.934115	0.934337	0.934295	0.93405	0.933648
65.85	0.91838	0.92618	0.93065	0.93309	0.93428		65.85	0.934057	0.934311	0.934293	0.934068	0.933682
65.9	0.91734	0.92557	0.93029	0.93289	0.93418		65.9	0.933996	0.934282	0.934289	0.934085	0.933715
65.95	0.91626	0.92492	0.92991	0.93268	0.93408		65.95	0.933932	0.93425	0.934283	0.934099	0.933746
66	0.91512	0.92425	0.92951	0.93246	0.93396		66	0.933864	0.934216	0.934275	0.934112	0.933776
66.05	0.91392	0.92354	0.9291	0.93222	0.93384		66.05	0.933793	0.934179	0.934265	0.934123	0.933804
66.1	0.91267	0.92279	0.92866	0.93197	0.93371		66.1	0.933718	0.93414	0.934253	0.934132	0.933831
66.15	0.91135	0.92201	0.92819	0.9317	0.93357		66.15	0.93364	0.934097	0.934238	0.93414	0.933856
66.2	0.90997	0.9212	0.92771	0.93142	0.93342		66.2	0.933558	0.934052	0.934221	0.934145	0.93388
66.25	0.90853	0.92034	0.9272	0.93113	0.93326		66.25	0.933472	0.934003	0.934202	0.934148	0.933902
66.3	0.90701	0.91944	0.92667	0.93082	0.93309		66.3	0.933383	0.933952	0.93418	0.93415	0.933922
66.35	0.90543	0.9185	0.92611	0.93049	0.93291		66.35	0.93329	0.933898	0.934156	0.93415	0.93394
66.4	0.90376	0.91752	0.92552	0.93015	0.93272		66.4	0.933193	0.933841	0.93413	0.934147	0.933957
66.45	0.90201	0.91648	0.9249	0.92978	0.93251		66.45	0.933092	0.93378	0.934101	0.934143	0.933973
66.5	0.90018	0.9154	0.92426	0.9294	0.9323		66.5	0.932987	0.933717	0.934069	0.934137	0.933986
66.55	0.89827	0.91427	0.92359	0.929	0.93207		66.55	0.932877	0.93365	0.934035	0.934128	0.933998
66.6	0.89625	0.91309	0.92288	0.92858	0.93183		66.6	0.932764	0.93358	0.933999	0.934118	0.934009
66.65	0.89414	0.91185	0.92214	0.92814	0.93158		66.65	0.932646	0.933507	0.933959	0.934105	0.934017
66.7	0.89193	0.91055	0.92137	0.92768	0.93131		66.7	0.932524	0.93343	0.933918	0.93409	0.934024
66.75	0.88961	0.90919	0.92056	0.9272	0.93103		66.75	0.932398	0.93335	0.933873	0.934074	0.934029
66.8	0.88718	0.90777	0.91971	0.92669	0.93073		66.8	0.932267	0.933267	0.933826	0.934055	0.934032
66.85	0.88463	0.90628	0.91882	0.92616	0.93042		66.85	0.932131	0.93318	0.933776	0.934033	0.934034
66.9	0.88196	0.90473	0.9179	0.92561	0.93009		66.9	0.931991	0.933089	0.933723	0.93401	0.934034
66.95	0.87915	0.9031	0.91693	0.92503	0.92975		66.95	0.931846	0.932995	0.933668	0.933984	0.934031
67	0.87621	0.90139	0.91591	0.92442	0.92939		67	0.931696	0.932897	0.933609	0.933956	0.934027
67.05	0.87313	0.8996	0.91485	0.92378	0.92901		67.05	0.931542	0.932795	0.933548	0.933926	0.934021
67.1	0.86989	0.89773	0.91375	0.92312	0.92862		67.1	0.931382	0.93269	0.933483	0.933893	0.934013
67.15	0.86649	0.89578	0.91259	0.92243	0.9282		67.15	0.931217	0.93258	0.933416	0.933858	0.934004
67.2	0.86293	0.89373	0.91138	0.9217	0.92777		67.2	0.931047	0.932467	0.933345	0.93382	0.933992
67.25	0.85919	0.89159	0.91012	0.92094	0.92731		67.25	0.930872	0.93235	0.933272	0.93378	0.933978
67.3	0.85527	0.88934	0.9088	0.92015	0.92684		67.3	0.930692	0.932228	0.933195	0.933738	0.933962
67.35	0.85115	0.88699	0.90742	0.91933	0.92634		67.35	0.930505	0.932102	0.933115	0.933693	0.933945
67.4	0.84683	0.88453	0.90597	0.91846	0.92582		67.4	0.930314	0.931972	0.933031	0.933645	0.933925
67.45	0.84229	0.88196	0.90447	0.91756	0.92528		67.45	0.930116	0.931838	0.932945	0.933595	0.933903
67.5	0.83753	0.87926	0.90289	0.91662	0.92472		67.5	0.929913	0.9317	0.932855	0.933542	0.933879
67.55	0.83253	0.87644	0.90124	0.91564	0.92413		67.55	0.929704	0.931557	0.932761	0.933487	0.933853
67.6	0.82729	0.87348	0.89953	0.91462	0.92351		67.6	0.929489	0.931409	0.932665	0.933429	0.933825
67.65	0.82178	0.87039	0.89773	0.91355	0.92286		67.65	0.929268	0.931257	0.932564	0.933368	0.933794
67.7	0.816	0.86714	0.89585	0.91243	0.92219		67.7	0.929041	0.9311	0.93246	0.933304	0.933762
67.75	0.80992	0.86375	0.89389	0.91127	0.92149		67.75	0.928807	0.930938	0.932353	0.933237	0.933727
67.8	0.80355	0.86019	0.89184	0.91005	0.92076		67.8	0.928567	0.930772	0.932241	0.933168	0.93369
67.85	0.79686	0.85646	0.88969	0.90878	0.91999		67.85	0.92832	0.9306	0.932126	0.933096	0.93365
67.9	0.78984	0.85256	0.88745	0.90746	0.9192		67.9	0.928066	0.930424	0.932007	0.93302	0.933609
67.95	0.78247	0.84847	0.88511	0.90608	0.91837		67.95	0.927806	0.930242	0.931884	0.932942	0.933565
68	0.77473	0.84418	0.88267	0.90464	0.91751		68	0.927539	0.930056	0.931758	0.932861	0.933518
68.05	0.76661	0.83969	0.88011	0.90314	0.9166		68.05	0.927264	0.929864	0.931627	0.932776	0.933469
68.1	0.75808	0.83499	0.87744	0.90157	0.91566		68.1	0.926983	0.929666	0.931492	0.932689	0.933418
68.15	0.74914	0.83005	0.87464	0.89994	0.91469		68.15	0.926693	0.929463	0.931353	0.932598	0.933364
68.2	0.73976	0.82489	0.87172	0.89823	0.91367		68.2	0.926397	0.929255	0.93121	0.932504	0.933308
68.25	0.72993	0.81947	0.86866	0.89645	0.9126		68.25	0.926093	0.929041	0.931063	0.932407	0.933249
68.3	0.71962	0.81379	0.86547	0.8946	0.9115		68.3	0.925781	0.928821	0.930911	0.932306	0.933187
68.35	0.70882	0.80784	0.86213	0.89266	0.91034		68.35	0.925461	0.928595	0.930755	0.932202	0.933123
68.4	0.6975	0.80161	0.85864	0.89064	0.90914		68.4	0.925133	0.928363	0.930594	0.932095	0.933057
68.45	0.68565	0.79508	0.85498	0.88853	0.90789		68.45	0.924797	0.928125	0.930429	0.931984	0.932987
68.5	0.67325	0.78823	0.85116	0.88633	0.90659		68.5	0.924452	0.927881	0.930259	0.93187	0.932915
68.55	0.66028	0.78105	0.84717	0.88404	0.90523		68.55	0.924099	0.927631	0.930084	0.931752	0.93284
68.6	0.64673	0.77354	0.84299	0.88164	0.90382		68.6	0.923737	0.927374	0.929905	0.931631	0.932763
68.65	0.63257	0.76566	0.83862	0.87915	0.90234		68.65	0.923366	0.927111	0.929721	0.931505	0.932682
68.7	0.61781	0.75741	0.83404	0.87654	0.90081		68.7	0.922986	0.926841	0.929532	0.931376	0.932599
68.75	0.60242	0.74877	0.82926	0.87382	0.89921		68.75	0.922597	0.926564	0.929337	0.931244	0.932512
68.8	0.5864	0.73972	0.82426	0.87098	0.89755		68.8	0.922198	0.926281	0.929138	0.931107	0.932423
68.85	0.56973	0.73024	0.81902	0.86801	0.89582		68.85	0.92179	0.92599	0.928934	0.930966	0.932331
68.9	0.55243	0.72033	0.81354	0.86492	0.89401		68.9	0.921372	0.925693	0.928724	0.930822	0.932235
68.95	0.53449	0.70996	0.80781	0.86169	0.89213		68.95	0.920944	0.925388	0.928509	0.930673	0.932137
69	0.51592	0.69911	0.80181	0.85831	0.89017		69	0.920506	0.925076	0.928288	0.930521	0.932036
69.05	0.49673	0.68776	0.79554	0.85479	0.88813		69.05	0.920058	0.924756	0.928062	0.930364	0.931931
69.1	0.47694	0.67591	0.78898	0.85112	0.88601		69.1	0.919599	0.924429	0.927831	0.930203	0.931823
69.15	0.45659	0.66354	0.78211	0.84728	0.8838		69.15	0.919129	0.924093	0.927593	0.930038	0.931712
69.2	0.43569	0.65062	0.77493	0.84327	0.88149		69.2	0.918648	0.92375	0.92735	0.929868	0.931597
69.25	0.4143	0.63715	0.76742	0.83909	0.87909		69.25	0.918156	0.923399	0.927101	0.929694	0.93148
69.3	0.39247	0.62311	0.75956	0.83472	0.87659		69.3	0.917653	0.92304	0.926845	0.929516	0.931359
69.35	0.37026	0.6085	0.75135	0.83015	0.87398		69.35	0.917138	0.922672	0.926584	0.929333	0.931234
69.4	0.34774	0.5933	0.74276	0.82538	0.87126		69.4	0.916611	0.922296	0.926317	0.929145	0.931106
69.45	0.32499	0.5775	0.73379	0.82041	0.86843		69.45	0.916072	0.921911	0.926043	0.928953	0.930974
69.5	0.30211	0.56111	0.72441	0.81521	0.86548		69.5	0.915521	0.921517	0.925762	0.928755	0.930839
69.55	0.27919	0.54412	0.71461	0.80978	0.86241		69.55	0.914957	0.921114	0.925476	0.928553	0.9307
69.6	0.25636	0.52654	0.70438	0.80411	0.85921		69.6	0.914381	0.920702	0.925182	0.928347	0.930558
69.65	0.23372	0.50838	0.6937	0.79818	0.85587		69.65	0.913791	0.920281	0.924882	0.928135	0.930411
69.7	0.21141	0.48965	0.68256	0.792	0.85239		69.7	0.913188	0.919851	0.924575	0.927918	0.930261
69.75	0.18956	0.47037	0.67093	0.78554	0.84876		69.75	0.912572	0.919411	0.924261	0.927696	0.930108
69.8	0.16831	0.45056	0.65881	0.77879	0.84498		69.8	0.911941	0.91896	0.92394	0.927468	0.92995
69.85	0.14779	0.43027	0.64619	0.77175	0.84104		69.85	0.911297	0.9185	0.923611	0.927236	0.929788
69.9	0.12815	0.40953	0.63305	0.7644	0.83693		69.9	0.910638	0.91803	0.923276	0.926998	0.929622
69.95	0.10953	0.38838	0.61938	0.75672	0.83265		69.95	0.909965	0.91755	0.922933	0.926755	0.929452
70	0.09204	0.36689	0.60517	0.74871	0.82819		70	0.909276	0.917058	0.922582	0.926506	0.929279
70.05	0.07583	0.34512	0.59041	0.74034	0.82353		70.05	0.908573	0.916557	0.922224	0.926251	0.9291
70.1	0.06099	0.32315	0.5751	0.73162	0.81868		70.1	0.907853	0.916044	0.921857	0.925991	0.928918
70.15	0.04763	0.30106	0.55924	0.72252	0.81362		70.15	0.907118	0.91552	0.921483	0.925725	0.928731
70.2	0.03583	0.27894	0.54283	0.71303	0.80835		70.2	0.906367	0.914985	0.921101	0.925453	0.92854
70.25	0.02565	0.2569	0.52586	0.70313	0.80285		70.25	0.905599	0.914438	0.92071	0.925175	0.928345
70.3	0.01715	0.23503	0.50836	0.69282	0.79711		70.3	0.904815	0.913879	0.920311	0.924891	0.928145
70.35	0.01036	0.21347	0.49032	0.68208	0.79114		70.35	0.904013	0.913309	0.919904	0.924601	0.927941
70.4	0.00528	0.19231	0.47177	0.67089	0.78491		70.4	0.903194	0.912726	0.919488	0.924304	0.927732
70.45	0.00192	0.1717	0.45274	0.65925	0.77841		70.45	0.902357	0.912131	0.919063	0.924001	0.927518
70.5	0.000227	0.15175	0.43324	0.64714	0.77164		70.5	0.901502	0.911523	0.918629	0.923692	0.927299
70.55	0.000178	0.13259	0.41332	0.63455	0.76458		70.55	0.900628	0.910902	0.918186	0.923376	0.927076
70.6	0.00171	0.11434	0.39302	0.62147	0.75723		70.6	0.899735	0.910268	0.917734	0.923053	0.926848
70.65	0.00475	0.09713	0.37239	0.6079	0.74957		70.65	0.898823	0.909621	0.917272	0.922724	0.926615
70.7	0.00922	0.08106	0.35148	0.59382	0.74159		70.7	0.897891	0.908961	0.916801	0.922388	0.926377
70.75	0.01502	0.06625	0.33036	0.57923	0.73327		70.75	0.89694	0.908286	0.91632	0.922045	0.926134
70.8	0.02206	0.05279	0.3091	0.56413	0.72461		70.8	0.895968	0.907597	0.915829	0.921695	0.925885
70.85	0.03023	0.04075	0.28778	0.54851	0.7156		70.85	0.894975	0.906894	0.915328	0.921337	0.925632
70.9	0.03943	0.0302	0.26649	0.53239	0.70621		70.9	0.89396	0.906177	0.914817	0.920973	0.925373
70.95	0.04955	0.0212	0.24532	0.51576	0.69645		70.95	0.892924	0.905444	0.914295	0.9206	0.925109
71	0.06049	0.01378	0.22437	0.49864	0.68629		71	0.891866	0.904697	0.913763	0.920221	0.924839
71.05	0.07214	0.00796	0.20375	0.48103	0.67573		71.05	0.890785	0.903934	0.91322	0.919834	0.924564
71.1	0.08441	0.00375	0.18357	0.46296	0.66475		71.1	0.889681	0.903155	0.912666	0.919438	0.924283
71.15	0.0972	0.00112	0.16393	0.44445	0.65335		71.15	0.888554	0.90236	0.912101	0.919036	0.923997
71.2	0.11041	5.5e-05	0.14496	0.42553	0.64151		71.2	0.887403	0.901549	0.911525	0.918625	0.923704
71.25	0.12398	0.000506	0.12676	0.40623	0.62923		71.25	0.886227	0.900721	0.910937	0.918205	0.923406
71.3	0.1378	0.00242	0.10945	0.38659	0.61649		71.3	0.885027	0.899876	0.910338	0.917778	0.923102
71.35	0.15183	0.00572	0.09313	0.36665	0.60329		71.35	0.883801	0.899015	0.909726	0.917342	0.922792
71.4	0.16598	0.01035	0.0779	0.34648	0.58963		71.4	0.882549	0.898135	0.909103	0.916898	0.922476
71.45	0.1802	0.0162	0.06385	0.32612	0.57549		71.45	0.88127	0.897238	0.908467	0.916445	0.922154
71.5	0.19444	0.0232	0.05107	0.30565	0.56089		71.5	0.879965	0.896322	0.907818	0.915984	0.921825
71.55	0.20865	0.03125	0.03962	0.28513	0.54581		71.55	0.878632	0.895388	0.907157	0.915513	0.92149
71.6	0.22279	0.04026	0.02958	0.26465	0.53026		71.6	0.877271	0.894436	0.906483	0.915034	0.921149
71.65	0.23682	0.05013	0.02097	0.24429	0.51424		71.65	0.875882	0.893463	0.905796	0.914545	0.920801
71.7	0.25071	0.06076	0.01384	0.22414	0.49777		71.7	0.874463	0.892472	0.905096	0.914047	0.920446
71.75	0.26443	0.07206	0.0082	0.20429	0.48086		71.75	0.873014	0.89146	0.904381	0.913539	0.920085
71.8	0.27795	0.08394	0.00406	0.18484	0.46352		71.8	0.871535	0.890428	0.903653	0.913022	0.919717
71.85	0.29127	0.09631	0.0014	0.1659	0.44577		71.85	0.870026	0.889376	0.902911	0.912495	0.919342
71.9	0.30435	0.1091	0.000202	0.14756	0.42763		71.9	0.868484	0.888302	0.902155	0.911958	0.91896
71.95	0.3172	0.12222	0.000424	0.12991	0.40915		71.95	0.866911	0.887207	0.901384	0.911411	0.918571
72	0.32979	0.13561	0.00202	0.11308	0.39034		72	0.865304	0.88609	0.900598	0.910854	0.918175
72.05	0.34212	0.14919	0.00493	0.09713	0.37126		72.05	0.863664	0.884951	0.899797	0.910286	0.917772
72.1	0.35419	0.16291	0.0091	0.08218	0.35194		72.1	0.86199	0.883789	0.898981	0.909708	0.917361
72.15	0.36598	0.17671	0.01443	0.0683	0.33243		72.15	0.860282	0.882605	0.89815	0.909119	0.916942
72.2	0.37751	0.19054	0.02087	0.05558	0.3128		72.2	0.858537	0.881396	0.897302	0.90852	0.916516
72.25	0.38876	0.20436	0.02831	0.04407	0.29311		72.25	0.856757	0.880164	0.896439	0.907909	0.916082
72.3	0.39974	0.21813	0.03669	0.03384	0.27342		72.3	0.854939	0.878907	0.895559	0.907287	0.915641
72.35	0.41044	0.23181	0.04591	0.02493	0.25381		72.35	0.853084	0.877626	0.894662	0.906654	0.915191
72.4	0.42088	0.24536	0.05588	0.01737	0.23435		72.4	0.851191	0.876319	0.893749	0.906009	0.914734
72.45	0.43105	0.25878	0.06653	0.0112	0.21512		72.45	0.849258	0.874987	0.892818	0.905353	0.914268
72.5	0.44095	0.27202	0.07776	0.00642	0.19621		72.5	0.847286	0.873628	0.89187	0.904684	0.913794
72.55	0.4506	0.28507	0.0895	0.00302	0.17772		72.55	0.845272	0.872243	0.890904	0.904004	0.913312
72.6	0.45999	0.29792	0.10167	0.000998	0.15971		72.6	0.843218	0.870831	0.88992	0.903311	0.912821
72.65	0.46914	0.31055	0.1142	0.000322	0.1423		72.65	0.841121	0.869391	0.888918	0.902605	0.912322
72.7	0.47804	0.32295	0.12702	0.000957	0.12556		72.7	0.838981	0.867922	0.887896	0.901888	0.911814
72.75	0.4867	0.33511	0.14007	0.00286	0.10959		72.75	0.836797	0.866426	0.886856	0.901157	0.911297
72.8	0.49513	0.34703	0.1533	0.00597	0.09446		72.8	0.834569	0.864899	0.885797	0.900413	0.910771
72.85	0.50334	0.35869	0.16663	0.01023	0.08026		72.85	0.832294	0.863344	0.884718	0.899656	0.910236
72.9	0.51132	0.3701	0.18004	0.01558	0.06707		72.9	0.829974	0.861758	0.883619	0.898886	0.909692
72.95	0.51909	0.38126	0.19347	0.02193	0.05494		72.95	0.827606	0.860141	0.882499	0.898102	0.909139
73	0.52666	0.39216	0.20688	0.02923	0.04395		73	0.82519	0.858492	0.881359	0.897304	0.908576
73.05	0.53401	0.4028	0.22024	0.03739	0.03414		73.05	0.822724	0.856812	0.880198	0.896492	0.908003
73.1	0.54118	0.41318	0.23351	0.04633	0.02555		73.1	0.820209	0.8551	0.879016	0.895665	0.907421
73.15	0.54815	0.42332	0.24668	0.05598	0.01821		73.15	0.817642	0.853354	0.877812	0.894825	0.906829
73.2	0.55493	0.4332	0.2597	0.06625	0.01216		73.2	0.815023	0.851574	0.876586	0.893969	0.906227
73.25	0.56154	0.44284	0.27257	0.07709	0.00739		73.25	0.812352	0.849761	0.875337	0.893099	0.905615
73.3	0.56797	0.45223	0.28527	0.08841	0.0039		73.3	0.809627	0.847912	0.874066	0.892213	0.904993
73.35	0.57424	0.46139	0.29777	0.10014	0.00169		73.35	0.806846	0.846028	0.872771	0.891313	0.90436
73.4	0.58034	0.47031	0.31007	0.11222	0.000739		73.4	0.80401	0.844108	0.871453	0.890396	0.903716
73.45	0.58628	0.479	0.32216	0.12459	0.00101		73.45	0.801117	0.842151	0.870111	0.889464	0.903063
73.5	0.59207	0.48747	0.33403	0.13719	0.00247		73.5	0.798166	0.840156	0.868745	0.888516	0.902398
73.55	0.59771	0.49572	0.34567	0.14996	0.00508		73.55	0.795156	0.838124	0.867353	0.887551	0.901722
73.6	0.60321	0.50376	0.35707	0.16286	0.00877		73.6	0.792086	0.836052	0.865937	0.88657	0.901035
73.65	0.60856	0.51159	0.36824	0.17584	0.0135		73.65	0.788955	0.833941	0.864495	0.885572	0.900337
73.7	0.61379	0.51921	0.37917	0.18886	0.0192		73.7	0.785762	0.83179	0.863027	0.884556	0.899628
73.75	0.61888	0.52664	0.38986	0.20188	0.0258		73.75	0.782506	0.829599	0.861533	0.883524	0.898907
73.8	0.62384	0.53388	0.40031	0.21487	0.03325		73.8	0.779185	0.827365	0.860012	0.882474	0.898174
73.85	0.62869	0.54092	0.41051	0.2278	0.04147		73.85	0.775799	0.82509	0.858464	0.881406	0.897429
73.9	0.63341	0.54779	0.42049	0.24063	0.05039		73.9	0.772346	0.822771	0.856888	0.88032	0.896673
73.95	0.63803	0.55448	0.43022	0.25335	0.05994		73.95	0.768826	0.820409	0.855284	0.879216	0.895904
74	0.64253	0.561	0.43973	0.26594	0.07005		74	0.765237	0.818003	0.853651	0.878093	0.895123
74.05	0.64692	0.56736	0.449	0.27837	0.08067		74.05	0.761579	0.815551	0.851989	0.876952	0.89433
74.1	0.65121	0.57355	0.45805	0.29064	0.09172		74.1	0.757849	0.813053	0.850298	0.875791	0.893523
74.15	0.6554	0.57959	0.46688	0.30273	0.10315		74.15	0.754048	0.810509	0.848576	0.87461	0.892704
74.2	0.65949	0.58547	0.47548	0.31462	0.1149		74.2	0.750173	0.807917	0.846824	0.87341	0.891872
74.25	0.66349	0.59121	0.48388	0.32632	0.1269		74.25	0.746224	0.805277	0.845041	0.87219	0.891027
74.3	0.66739	0.59681	0.49207	0.3378	0.13912		74.3	0.742199	0.802587	0.843227	0.87095	0.890169
74.35	0.67121	0.60226	0.50005	0.34908	0.1515		74.35	0.738098	0.799848	0.841381	0.869689	0.889297
74.4	0.67494	0.60759	0.50783	0.36013	0.16399		74.4	0.73392	0.797058	0.839502	0.868407	0.888411
74.45	0.67859	0.61278	0.51542	0.37097	0.17657		74.45	0.729662	0.794217	0.83759	0.867104	0.887512
74.5	0.68216	0.61785	0.52282	0.38158	0.18918		74.5	0.725325	0.791324	0.835645	0.865779	0.886598
74.55	0.68565	0.6228	0.53004	0.39196	0.2018		74.55	0.720907	0.788377	0.833666	0.864432	0.885671
74.6	0.68907	0.62763	0.53707	0.40213	0.21439		74.6	0.716406	0.785376	0.831653	0.863064	0.884729
74.65	0.69241	0.63234	0.54393	0.41206	0.22693		74.65	0.711823	0.782321	0.829604	0.861673	0.883772
74.7	0.69568	0.63695	0.55063	0.42178	0.2394		74.7	0.707155	0.77921	0.82752	0.860259	0.882801
74.75	0.69889	0.64144	0.55715	0.43128	0.25176		74.75	0.702403	0.776043	0.825399	0.858822	0.881815
74.8	0.70202	0.64584	0.56352	0.44056	0.264		74.8	0.697564	0.772818	0.823242	0.857362	0.880813
74.85	0.70509	0.65013	0.56973	0.44962	0.27611		74.85	0.692637	0.769535	0.821048	0.855878	0.879797
74.9	0.7081	0.65432	0.57578	0.45847	0.28807		74.9	0.687623	0.766193	0.818816	0.85437	0.878765
74.95	0.71105	0.65842	0.58169	0.46712	0.29987		74.95	0.68252	0.762791	0.816545	0.852837	0.877717
75	0.71394	0.66243	0.58746	0.47556	0.31149		75	0.677326	0.759329	0.814236	0.85128	0.876653
75.05	0.71677	0.66635	0.59309	0.48379	0.32293		75.05	0.672042	0.755804	0.811887	0.849698	0.875574
75.1	0.71955	0.67019	0.59858	0.49184	0.33417		75.1	0.666666	0.752218	0.809498	0.84809	0.874478
75.15	0.72227	0.67394	0.60395	0.49969	0.34523		75.15	0.661197	0.748568	0.807069	0.846457	0.873365
75.2	0.72494	0.67761	0.60918	0.50735	0.35608		75.2	0.655635	0.744854	0.804598	0.844797	0.872236
75.25	0.72756	0.6812	0.6143	0.51482	0.36673		75.25	0.649979	0.741075	0.802086	0.843111	0.87109
75.3	0.73013	0.68471	0.61929	0.52212	0.37717		75.3	0.644229	0.73723	0.799531	0.841398	0.869927
75.35	0.73265	0.68815	0.62417	0.52925	0.3874		75.35	0.638383	0.733319	0.796933	0.839658	0.868747
75.4	0.73513	0.69152	0.62894	0.5362	0.39743		75.4	0.632442	0.72934	0.794291	0.837891	0.867549
75.45	0.73756	0.69482	0.6336	0.54298	0.40725		75.45	0.626404	0.725292	0.791606	0.836095	0.866334
75.5	0.73994	0.69805	0.63815	0.54961	0.41686		75.5	0.62027	0.721176	0.788875	0.834271	0.865101
75.55	0.74229	0.70122	0.6426	0.55608	0.42626		75.55	0.614039	0.716989	0.786099	0.832419	0.863849
75.6	0.74459	0.70432	0.64695	0.56239	0.43546		75.6	0.60771	0.712732	0.783277	0.830538	0.86258
75.65	0.74685	0.70737	0.65121	0.56855	0.44445		75.65	0.601285	0.708404	0.780409	0.828627	0.861291
75.7	0.74907	0.71035	0.65537	0.57457	0.45325		75.7	0.594762	0.704003	0.777493	0.826686	0.859984
75.75	0.75126	0.71327	0.65944	0.58045	0.46185		75.75	0.588142	0.699529	0.77453	0.824715	0.858659
75.8	0.7534	0.71614	0.66342	0.58619	0.47025		75.8	0.581424	0.694981	0.771518	0.822714	0.857314
75.85	0.75551	0.71895	0.66732	0.5918	0.47847		75.85	0.574609	0.690359	0.768456	0.820682	0.855949
75.9	0.75759	0.72171	0.67114	0.59728	0.48649		75.9	0.567698	0.685662	0.765346	0.818618	0.854565
75.95	0.75963	0.72442	0.67487	0.60263	0.49434		75.95	0.560691	0.680889	0.762185	0.816523	0.853161
76	0.76164	0.72708	0.67853	0.60786	0.502		76	0.553588	0.67604	0.758973	0.814396	0.851738
76.05	0.76362	0.72969	0.68211	0.61298	0.50949		76.05	0.546391	0.671114	0.755709	0.812236	0.850294
76.1	0.76556	0.73225	0.68562	0.61797	0.5168		76.1	0.539099	0.66611	0.752394	0.810043	0.848829
76.15	0.76748	0.73477	0.68906	0.62286	0.52395		76.15	0.531714	0.661028	0.749026	0.807817	0.847344
76.2	0.76936	0.73724	0.69242	0.62764	0.53093		76.2	0.524238	0.655867	0.745604	0.805558	0.845838
76.25	0.77122	0.73966	0.69572	0.63231	0.53775		76.25	0.516671	0.650628	0.742129	0.803264	0.84431
76.3	0.77304	0.74205	0.69896	0.63688	0.54442		76.3	0.509015	0.645309	0.738599	0.800936	0.842762
76.35	0.77484	0.74439	0.70213	0.64135	0.55093		76.35	0.501271	0.63991	0.735014	0.798573	0.841191
76.4	0.77662	0.7467	0.70524	0.64572	0.55729		76.4	0.493442	0.634431	0.731374	0.796175	0.839599
76.45	0.77836	0.74896	0.7083	0.65	0.56351		76.45	0.48553	0.628872	0.727677	0.793741	0.837985
76.5	0.78008	0.75119	0.71129	0.65419	0.56959		76.5	0.477536	0.623232	0.723924	0.791272	0.836349
76.55	0.78178	0.75338	0.71423	0.65829	0.57553		76.55	0.469462	0.617511	0.720114	0.788766	0.83469
76.6	0.78345	0.75554	0.71711	0.66231	0.58134		76.6	0.461313	0.61171	0.716246	0.786223	0.833009
76.65	0.7851	0.75766	0.71994	0.66624	0.58702		76.65	0.453089	0.605827	0.712319	0.783642	0.831304
76.7	0.78673	0.75974	0.72271	0.67009	0.59257		76.7	0.444795	0.599864	0.708334	0.781025	0.829576
76.75	0.78833	0.76179	0.72544	0.67387	0.598		76.75	0.436433	0.59382	0.70429	0.778369	0.827825
76.8	0.78991	0.76382	0.72812	0.67756	0.6033		76.8	0.428007	0.587695	0.700186	0.775675	0.826051
76.85	0.79147	0.7658	0.73075	0.68118	0.6085		76.85	0.41952	0.58149	0.696021	0.772942	0.824252
76.9	0.79301	0.76776	0.73334	0.68474	0.61358		76.9	0.410977	0.575205	0.691796	0.77017	0.82243
76.95	0.79453	0.76969	0.73587	0.68822	0.61854		76.95	0.402381	0.56884	0.68751	0.767359	0.820583
77	0.79603	0.77159	0.73837	0.69163	0.62341		77	0.393736	0.562396	0.683163	0.764508	0.818711
77.05	0.79751	0.77346	0.74082	0.69498	0.62816		77.05	0.385048	0.555874	0.678754	0.761616	0.816815
77.1	0.79897	0.77531	0.74324	0.69826	0.63282		77.1	0.37632	0.549274	0.674283	0.758684	0.814894
77.15	0.80041	0.77713	0.74561	0.70148	0.63738		77.15	0.367558	0.542597	0.669749	0.755711	0.812948
77.2	0.80184	0.77892	0.74794	0.70464	0.64184		77.2	0.358768	0.535844	0.665152	0.752697	0.810977
77.25	0.80325	0.78068	0.75023	0.70774	0.64621		77.25	0.349953	0.529016	0.660493	0.74964	0.80898
77.3	0.80464	0.78243	0.75249	0.71078	0.6505		77.3	0.341121	0.522114	0.65577	0.746542	0.806957
77.35	0.80601	0.78414	0.75471	0.71377	0.65469		77.35	0.332277	0.515139	0.650984	0.743402	0.804908
77.4	0.80737	0.78584	0.7569	0.71671	0.6588		77.4	0.323428	0.508093	0.646134	0.740219	0.802833
77.45	0.80871	0.78751	0.75905	0.71959	0.66282		77.45	0.314578	0.500978	0.641221	0.736993	0.800731
77.5	0.81004	0.78915	0.76117	0.72242	0.66677		77.5	0.305736	0.493794	0.636243	0.733724	0.798603
77.55	0.81135	0.79078	0.76326	0.7252	0.67063		77.55	0.296908	0.486543	0.631202	0.730411	0.796448
77.6	0.81264	0.79239	0.76531	0.72793	0.67442		77.6	0.2881	0.479228	0.626097	0.727054	0.794266
77.65	0.81392	0.79397	0.76733	0.73062	0.67814		77.65	0.27932	0.471851	0.620927	0.723653	0.792057
77.7	0.81519	0.79553	0.76933	0.73326	0.68179		77.7	0.270575	0.464413	0.615694	0.720208	0.78982
77.75	0.81645	0.79708	0.77129	0.73585	0.68536		77.75	0.261873	0.456917	0.610398	0.716718	0.787556
77.8	0.81769	0.7986	0.77323	0.7384	0.68887		77.8	0.253221	0.449365	0.605037	0.713183	0.785264
77.85	0.81891	0.80011	0.77513	0.74091	0.69231		77.85	0.244627	0.441761	0.599614	0.709602	0.782944
77.9	0.82013	0.8016	0.77701	0.74338	0.69569		77.9	0.236099	0.434106	0.594127	0.705977	0.780595
77.95	0.82133	0.80307	0.77887	0.74581	0.699		77.95	0.227644	0.426404	0.588577	0.702306	0.778219
78	0.82252	0.80452	0.7807	0.7482	0.70225		78	0.219272	0.418658	0.582966	0.698589	0.775814
78.05	0.8237	0.80595	0.7825	0.75055	0.70545		78.05	0.21099	0.410871	0.577292	0.694826	0.77338
78.1	0.82486	0.80737	0.78428	0.75286	0.70859		78.1	0.202806	0.403046	0.571557	0.691017	0.770918
78.15	0.82602	0.80877	0.78603	0.75514	0.71167		78.15	0.194728	0.395187	0.565761	0.687162	0.768427
78.2	0.82716	0.81016	0.78777	0.75738	0.7147		78.2	0.186766	0.387298	0.559905	0.68326	0.765906
78.25	0.82829	0.81153	0.78947	0.75959	0.71767		78.25	0.178926	0.379382	0.553989	0.679312	0.763357
78.3	0.82942	0.81288	0.79116	0.76176	0.72059		78.3	0.171218	0.371444	0.548015	0.675318	0.760778
78.35	0.83053	0.81422	0.79283	0.76391	0.72346		78.35	0.163649	0.363488	0.541982	0.671276	0.758169
78.4	0.83163	0.81555	0.79447	0.76602	0.72629		78.4	0.156228	0.355518	0.535893	0.667189	0.755531
78.45	0.83272	0.81686	0.79609	0.7681	0.72906		78.45	0.148963	0.347538	0.529748	0.663054	0.752864
78.5	0.8338	0.81816	0.7977	0.77015	0.73179		78.5	0.141861	0.339554	0.523548	0.658873	0.750166
78.55	0.83487	0.81944	0.79928	0.77217	0.73448		78.55	0.134931	0.33157	0.517295	0.654645	0.747439
78.6	0.83593	0.82071	0.80084	0.77416	0.73712		78.6	0.12818	0.323591	0.510989	0.650371	0.744681
78.65	0.83699	0.82197	0.80239	0.77613	0.73972		78.65	0.121615	0.315623	0.504631	0.64605	0.741894
78.7	0.83803	0.82321	0.80391	0.77806	0.74227		78.7	0.115244	0.30767	0.498225	0.641683	0.739076
78.75	0.83907	0.82444	0.80542	0.77998	0.74479		78.75	0.109073	0.299738	0.49177	0.63727	0.736229
78.8	0.84009	0.82566	0.80692	0.78186	0.74727		78.8	0.10311	0.291832	0.485268	0.632811	0.733351
78.85	0.84111	0.82687	0.80839	0.78372	0.7497		78.85	0.097361	0.283958	0.478722	0.628306	0.730442
78.9	0.84212	0.82807	0.80985	0.78556	0.7521		78.9	0.091832	0.276122	0.472133	0.623755	0.727504
78.95	0.84312	0.82926	0.81129	0.78737	0.75447		78.95	0.086529	0.26833	0.465503	0.619159	0.724535
79	0.84412	0.83043	0.81272	0.78915	0.7568		79	0.081458	0.260587	0.458833	0.614518	0.721536
79.05	0.8451	0.83159	0.81413	0.79092	0.75909		79.05	0.076624	0.2529	0.452126	0.609833	0.718507
79.1	0.84608	0.83275	0.81552	0.79266	0.76135		79.1	0.072031	0.245274	0.445385	0.605103	0.715447
79.15	0.84705	0.83389	0.8169	0.79438	0.76358		79.15	0.067684	0.237716	0.438611	0.60033	0.712357
79.2	0.84802	0.83502	0.81827	0.79608	0.76577		79.2	0.063588	0.230233	0.431807	0.595513	0.709237
79.25	0.84897	0.83614	0.81962	0.79776	0.76793		79.25	0.059745	0.22283	0.424975	0.590653	0.706086
79.3	0.84992	0.83726	0.82096	0.79942	0.77007		79.3	0.05616	0.215513	0.418118	0.585751	0.702906
79.35	0.85087	0.83836	0.82228	0.80106	0.77217		79.35	0.052835	0.20829	0.411239	0.580807	0.699696
79.4	0.85181	0.83945	0.82359	0.80268	0.77424		79.4	0.049772	0.201166	0.40434	0.575822	0.696455
79.45	0.85274	0.84054	0.82489	0.80428	0.77629		79.45	0.046975	0.194148	0.397425	0.570797	0.693185
79.5	0.85366	0.84162	0.82617	0.80586	0.77831		79.5	0.044443	0.187242	0.390496	0.565732	0.689886
79.55	0.85458	0.84268	0.82745	0.80742	0.7803		79.55	0.042179	0.180454	0.383556	0.560628	0.686557
79.6	0.85549	0.84374	0.82871	0.80897	0.78226		79.6	0.040182	0.173791	0.376609	0.555486	0.683198
79.65	0.85639	0.84479	0.82996	0.8105	0.7842		79.65	0.038455	0.167259	0.369659	0.550306	0.679811
79.7	0.85729	0.84584	0.83119	0.81201	0.78611		79.7	0.036995	0.160863	0.362707	0.54509	0.676395
79.75	0.85819	0.84687	0.83242	0.81351	0.788		79.75	0.035804	0.15461	0.355759	0.539839	0.67295
79.8	0.85908	0.8479	0.83364	0.81498	0.78987		79.8	0.034879	0.148506	0.348817	0.534553	0.669476
79.85	0.85996	0.84892	0.83484	0.81645	0.79171		79.85	0.03422	0.142557	0.341885	0.529234	0.665974
79.9	0.86084	0.84993	0.83603	0.8179	0.79353		79.9	0.033825	0.136768	0.334967	0.523883	0.662445
79.95	0.86171	0.85093	0.83722	0.81933	0.79532		79.95	0.033692	0.131144	0.328068	0.5185	0.658887
80	0.86258	0.85193	0.83839	0.82075	0.7971		80	0.033817	0.125692	0.32119	0.513088	0.655303
80.05	0.86344	0.85292	0.83955	0.82215	0.79885		80.05	0.0342	0.120415	0.314337	0.507647	0.651691
80.1	0.8643	0.8539	0.84071	0.82354	0.80059		80.1	0.034835	0.11532	0.307515	0.502179	0.648053
80.15	0.86515	0.85488	0.84185	0.82492	0.8023		80.15	0.035721	0.110411	0.300727	0.496685	0.644389
80.2	0.866	0.85585	0.84298	0.82628	0.80399		80.2	0.036852	0.105692	0.293977	0.491167	0.640699
80.25	0.86684	0.85681	0.84411	0.82763	0.80566		80.25	0.038225	0.101168	0.28727	0.485626	0.636984
80.3	0.86768	0.85777	0.84523	0.82897	0.80732		80.3	0.039836	0.096842	0.28061	0.480063	0.633243
80.35	0.86851	0.85872	0.84633	0.8303	0.80895		80.35	0.04168	0.09272	0.274001	0.474481	0.629478
80.4	0.86934	0.85966	0.84743	0.83161	0.81057		80.4	0.043752	0.088804	0.267448	0.468881	0.62569
80.45	0.87017	0.8606	0.84852	0.83291	0.81217		80.45	0.046047	0.085097	0.260955	0.463264	0.621878
80.5	0.87099	0.86153	0.8496	0.8342	0.81375		80.5	0.04856	0.081603	0.254527	0.457633	0.618043
80.55	0.8718	0.86246	0.85068	0.83548	0.81532		80.55	0.051286	0.078325	0.248169	0.45199	0.614185
80.6	0.87262	0.86338	0.85175	0.83674	0.81687		80.6	0.054218	0.075264	0.241884	0.446335	0.610306
80.65	0.87343	0.8643	0.8528	0.838	0.8184		80.65	0.057351	0.072423	0.235678	0.440672	0.606406
80.7	0.87423	0.86521	0.85386	0.83924	0.81992		80.7	0.060679	0.069805	0.229554	0.435003	0.602486
80.75	0.87503	0.86612	0.8549	0.84047	0.82142		80.75	0.064197	0.06741	0.223518	0.429328	0.598546
80.8	0.87583	0.86702	0.85594	0.8417	0.82291		80.8	0.067898	0.06524	0.217574	0.423651	0.594587
80.85	0.87663	0.86791	0.85697	0.84291	0.82438		80.85	0.071776	0.063296	0.211727	0.417974	0.590609
80.9	0.87742	0.8688	0.85799	0.84411	0.82584		80.9	0.075825	0.061578	0.205981	0.412299	0.586614
80.95	0.8782	0.86969	0.859	0.84531	0.82728		80.95	0.080039	0.060088	0.20034	0.406628	0.582603
81	0.87899	0.87057	0.86001	0.84649	0.82871		81	0.084411	0.058825	0.194809	0.400964	0.578575
81.05	0.87977	0.87144	0.86102	0.84767	0.83013		81.05	0.088936	0.057788	0.189392	0.395309	0.574533
81.1	0.88054	0.87231	0.86201	0.84883	0.83153		81.1	0.093606	0.056979	0.184094	0.389665	0.570476
81.15	0.88132	0.87318	0.863	0.84999	0.83292		81.15	0.098417	0.056395	0.178918	0.384035	0.566406
81.2	0.88209	0.87404	0.86399	0.85114	0.8343		81.2	0.103361	0.056035	0.17387	0.378422	0.562324
81.25	0.88286	0.8749	0.86496	0.85228	0.83567		81.25	0.108433	0.0559	0.168952	0.372828	0.55823
81.3	0.88362	0.87576	0.86594	0.85341	0.83702		81.3	0.113626	0.055986	0.164169	0.367256	0.554126
81.35	0.88438	0.87661	0.8669	0.85453	0.83836		81.35	0.118935	0.056292	0.159525	0.361709	0.550013
81.4	0.88514	0.87745	0.86786	0.85565	0.83969		81.4	0.124353	0.056816	0.155023	0.356189	0.545892
81.45	0.8859	0.87829	0.86882	0.85675	0.84101		81.45	0.129875	0.057555	0.150667	0.350699	0.541763
81.5	0.88665	0.87913	0.86977	0.85785	0.84232		81.5	0.135496	0.058508	0.146461	0.345241	0.537629
81.55	0.8874	0.87997	0.87071	0.85894	0.84361		81.55	0.141208	0.059672	0.142407	0.33982	0.533489
81.6	0.88815	0.8808	0.87165	0.86003	0.8449		81.6	0.147008	0.061042	0.13851	0.334437	0.529346
81.65	0.88889	0.88163	0.87259	0.86111	0.84617		81.65	0.152889	0.062617	0.134772	0.329095	0.525201
81.7	0.88964	0.88245	0.87351	0.86218	0.84744		81.7	0.158846	0.064393	0.131196	0.323798	0.521054
81.75	0.89038	0.88327	0.87444	0.86324	0.84869		81.75	0.164875	0.066366	0.127785	0.318548	0.516907
81.8	0.89111	0.88409	0.87536	0.8643	0.84994		81.8	0.170969	0.068534	0.124541	0.313349	0.512762
81.85	0.89185	0.8849	0.87627	0.86535	0.85118		81.85	0.177125	0.070891	0.121468	0.308202	0.508619
81.9	0.89258	0.88571	0.87718	0.86639	0.8524		81.9	0.183337	0.073433	0.118567	0.303112	0.50448
81.95	0.89331	0.88651	0.87809	0.86743	0.85362		81.95	0.189601	0.076158	0.11584	0.298081	0.500347
82	0.89404	0.88732	0.87899	0.86846	0.85483		82	0.195912	0.079061	0.113289	0.293113	0.49622
82.05	0.89477	0.88812	0.87989	0.86948	0.85603		82.05	0.202265	0.082137	0.110917	0.288209	0.492102
82.1	0.89549	0.88892	0.88078	0.8705	0.85722		82.1	0.208658	0.085381	0.108724	0.283374	0.487993
82.15	0.89621	0.88971	0.88167	0.87151	0.8584		82.15	0.215085	0.088791	0.106712	0.278611	0.483896
82.2	0.89693	0.8905	0.88255	0.87252	0.85957		82.2	0.221543	0.09236	0.104882	0.273921	0.479812
82.25	0.89765	0.89129	0.88343	0.87352	0.86074		82.25	0.228028	0.096085	0.103235	0.269309	0.475742
82.3	0.89837	0.89208	0.88431	0.87452	0.8619		82.3	0.234536	0.09996	0.101773	0.264777	0.471687
82.35	0.89908	0.89286	0.88518	0.87551	0.86305		82.35	0.241064	0.103981	0.100495	0.260328	0.467651
82.4	0.89979	0.89364	0.88605	0.87649	0.86419		82.4	0.247608	0.108144	0.099402	0.255965	0.463633
82.45	0.9005	0.89442	0.88691	0.87747	0.86533		82.45	0.254166	0.112444	0.098494	0.251691	0.459636
82.5	0.90121	0.89519	0.88777	0.87845	0.86645		82.5	0.260734	0.116875	0.097772	0.247508	0.455662
82.55	0.90192	0.89597	0.88863	0.87942	0.86757		82.55	0.267308	0.121434	0.097235	0.243421	0.451712
82.6	0.90262	0.89674	0.88949	0.88038	0.86869		82.6	0.273887	0.126115	0.096883	0.239431	0.447788
82.65	0.90333	0.8975	0.89034	0.88134	0.86979		82.65	0.280468	0.130914	0.096716	0.235541	0.443891
82.7	0.90403	0.89827	0.89118	0.88229	0.87089		82.7	0.287048	0.135826	0.096732	0.231754	0.440024
82.75	0.90473	0.89903	0.89203	0.88325	0.87199		82.75	0.293624	0.140847	0.096932	0.228072	0.436188
82.8	0.90543	0.89979	0.89287	0.88419	0.87307		82.8	0.300195	0.145971	0.097314	0.224498	0.432385
82.85	0.90612	0.90055	0.89371	0.88513	0.87415		82.85	0.306757	0.151196	0.097877	0.221035	0.428617
82.9	0.90682	0.90131	0.89454	0.88607	0.87523		82.9	0.31331	0.156515	0.098619	0.217685	0.424885
82.95	0.90751	0.90206	0.89537	0.887	0.8763		82.95	0.31985	0.161925	0.09954	0.214451	0.421192
83	0.9082	0.90282	0.8962	0.88793	0.87736		83	0.326376	0.167421	0.100637	0.211334	0.41754
83.05	0.90889	0.90357	0.89703	0.88886	0.87842		83.05	0.332887	0.173	0.10191	0.208338	0.413929
83.1	0.90958	0.90431	0.89785	0.88978	0.87947		83.1	0.33938	0.178656	0.103355	0.205464	0.410362
83.15	0.91027	0.90506	0.89867	0.89069	0.88051		83.15	0.345854	0.184386	0.104972	0.202714	0.406842
83.2	0.91096	0.90581	0.89949	0.89161	0.88155		83.2	0.352308	0.190185	0.106758	0.20009	0.403369
83.25	0.91164	0.90655	0.9003	0.89251	0.88259		83.25	0.358739	0.196051	0.10871	0.197596	0.399946
83.3	0.91233	0.90729	0.90112	0.89342	0.88361		83.3	0.365148	0.201978	0.110827	0.195231	0.396575
83.35	0.91301	0.90803	0.90193	0.89432	0.88464		83.35	0.371532	0.207964	0.113106	0.192998	0.393257
83.4	0.91369	0.90876	0.90273	0.89522	0.88566		83.4	0.37789	0.214004	0.115544	0.1909	0.389995
83.45	0.91437	0.9095	0.90354	0.89611	0.88667		83.45	0.384222	0.220096	0.118139	0.188936	0.38679
83.5	0.91505	0.91023	0.90434	0.89701	0.88768		83.5	0.390526	0.226234	0.120888	0.18711	0.383645
83.55	0.91573	0.91097	0.90514	0.89789	0.88868		83.55	0.396802	0.232417	0.123789	0.185422	0.380561
83.6	0.91641	0.9117	0.90594	0.89878	0.88968		83.6	0.403048	0.238641	0.126838	0.183873	0.37754
83.65	0.91708	0.91242	0.90673	0.89966	0.89068		83.65	0.409265	0.244902	0.130033	0.182466	0.374585
83.7	0.91776	0.91315	0.90753	0.90054	0.89167		83.7	0.41545	0.251199	0.13337	0.1812	0.371696
83.75	0.91843	0.91388	0.90832	0.90141	0.89265		83.75	0.421604	0.257526	0.136847	0.180078	0.368877
83.8	0.9191	0.9146	0.90911	0.90228	0.89363		83.8	0.427726	0.263883	0.140461	0.1791	0.366128
83.85	0.91978	0.91532	0.90989	0.90315	0.89461		83.85	0.433815	0.270265	0.144208	0.178266	0.363452
83.9	0.92045	0.91605	0.91068	0.90402	0.89558		83.9	0.439871	0.276671	0.148085	0.177579	0.360851
83.95	0.92112	0.91677	0.91146	0.90488	0.89655		83.95	0.445894	0.283098	0.15209	0.177037	0.358326
84	0.92179	0.91748	0.91224	0.90574	0.89752		84	0.451883	0.289543	0.156219	0.176643	0.35588
84.05	0.92245	0.9182	0.91302	0.9066	0.89848		84.05	0.457838	0.296003	0.160468	0.176396	0.353513
84.1	0.92312	0.91892	0.9138	0.90746	0.89944		84.1	0.463758	0.302478	0.164835	0.176297	0.35123
84.15	0.92379	0.91963	0.91458	0.90831	0.90039		84.15	0.469644	0.308963	0.169317	0.176345	0.349029
84.2	0.92445	0.92035	0.91535	0.90916	0.90134		84.2	0.475495	0.315458	0.17391	0.176542	0.346915
84.25	0.92512	0.92106	0.91612	0.91001	0.90229		84.25	0.481311	0.321961	0.178611	0.176888	0.344888
84.3	0.92578	0.92177	0.91689	0.91085	0.90323		84.3	0.487091	0.328468	0.183417	0.177381	0.34295
84.35	0.92645	0.92248	0.91766	0.91169	0.90417		84.35	0.492837	0.334979	0.188324	0.178023	0.341104
84.4	0.92711	0.92319	0.91843	0.91254	0.90511		84.4	0.498548	0.341492	0.193331	0.178813	0.33935
84.45	0.92777	0.9239	0.91919	0.91337	0.90604		84.45	0.504223	0.348005	0.198433	0.179751	0.33769
84.5	0.92843	0.9246	0.91995	0.91421	0.90697		84.5	0.509864	0.354516	0.203628	0.180836	0.336127
84.55	0.92909	0.92531	0.92072	0.91504	0.90789		84.55	0.515469	0.361024	0.208912	0.182069	0.334661
84.6	0.92975	0.92601	0.92148	0.91587	0.90882		84.6	0.521039	0.367528	0.214283	0.183447	0.333294
84.65	0.93041	0.92672	0.92224	0.9167	0.90974		84.65	0.526574	0.374026	0.219737	0.184972	0.332029
84.7	0.93107	0.92742	0.92299	0.91753	0.91065		84.7	0.532075	0.380517	0.225272	0.186643	0.330866
84.75	0.93173	0.92812	0.92375	0.91836	0.91157		84.75	0.537541	0.387	0.230885	0.188458	0.329807
84.8	0.93239	0.92882	0.92451	0.91918	0.91248		84.8	0.542972	0.393473	0.236572	0.190416	0.328854
84.85	0.93304	0.92952	0.92526	0.92	0.91339		84.85	0.54837	0.399936	0.242332	0.192518	0.328007
84.9	0.9337	0.93022	0.92601	0.92082	0.91429		84.9	0.553733	0.406387	0.248162	0.194762	0.32727
84.95	0.93435	0.93092	0.92676	0.92164	0.9152		84.95	0.559063	0.412826	0.254058	0.197147	0.326642
85	0.93501	0.93162	0.92751	0.92245	0.9161		85	0.564359	0.419251	0.260019	0.199672	0.326125
85.05	0.93566	0.93232	0.92826	0.92327	0.917		85.05	0.569622	0.425663	0.266041	0.202336	0.325721
85.1	0.93632	0.93301	0.92901	0.92408	0.91789		85.1	0.574852	0.432059	0.272123	0.205139	0.325432
85.15	0.93697	0.93371	0.92975	0.92489	0.91879		85.15	0.58005	0.43844	0.278262	0.208078	0.325257
85.2	0.93763	0.9344	0.9305	0.9257	0.91968		85.2	0.585215	0.444805	0.284455	0.211152	0.325199
85.25	0.93828	0.9351	0.93124	0.9265	0.92056		85.25	0.590348	0.451152	0.2907	0.214361	0.325259
85.3	0.93893	0.93579	0.93199	0.92731	0.92145		85.3	0.59545	0.457483	0.296996	0.217703	0.325438
85.35	0.93958	0.93648	0.93273	0.92811	0.92233		85.35	0.600521	0.463795	0.303339	0.221177	0.325737
85.4	0.94023	0.93717	0.93347	0.92892	0.92322		85.4	0.60556	0.47009	0.309728	0.224781	0.326157
85.45	0.94089	0.93786	0.93421	0.92972	0.9241		85.45	0.61057	0.476365	0.316161	0.228515	0.3267
85.5	0.94154	0.93855	0.93495	0.93052	0.92497		85.5	0.615549	0.482622	0.322635	0.232375	0.327367
85.55	0.94219	0.93924	0.93569	0.93132	0.92585		85.55	0.620498	0.488859	0.32915	0.236363	0.328158
85.6	0.94284	0.93993	0.93642	0.93211	0.92672		85.6	0.625418	0.495077	0.335702	0.240475	0.329074
85.65	0.94349	0.94062	0.93716	0.93291	0.92759		85.65	0.630309	0.501275	0.342291	0.24471	0.330118
85.7	0.94414	0.94131	0.93789	0.9337	0.92846		85.7	0.635172	0.507453	0.348915	0.249068	0.331288
85.75	0.94479	0.942	0.93863	0.9345	0.92933		85.75	0.640007	0.51361	0.355571	0.253546	0.332588
85.8	0.94544	0.94268	0.93936	0.93529	0.9302		85.8	0.644814	0.519748	0.362259	0.258143	0.334016
85.85	0.94608	0.94337	0.9401	0.93608	0.93106		85.85	0.649594	0.525865	0.368977	0.262857	0.335575
85.9	0.94673	0.94406	0.94083	0.93687	0.93192		85.9	0.654347	0.531962	0.375724	0.267688	0.337265
85.95	0.94738	0.94474	0.94156	0.93766	0.93278		85.95	0.659075	0.538038	0.382497	0.272634	0.339087
86	0.94803	0.94543	0.94229	0.93844	0.93364		86	0.663776	0.544094	0.389297	0.277693	0.341042
86.05	0.94868	0.94611	0.94302	0.93923	0.9345		86.05	0.668452	0.55013	0.396121	0.282863	0.343131
86.1	0.94933	0.9468	0.94375	0.94002	0.93536		86.1	0.673103	0.556146	0.402969	0.288145	0.345353
86.15	0.94997	0.94748	0.94448	0.9408	0.93621		86.15	0.677729	0.562141	0.409839	0.293535	0.347711
86.2	0.95062	0.94817	0.94521	0.94158	0.93706		86.2	0.682332	0.568116	0.416731	0.299033	0.350205
86.25	0.95127	0.94885	0.94593	0.94237	0.93791		86.25	0.686911	0.574072	0.423643	0.304637	0.352835
86.3	0.95191	0.94953	0.94666	0.94315	0.93876		86.3	0.691467	0.580008	0.430574	0.310347	0.355602
86.35	0.95256	0.95021	0.94739	0.94393	0.93961		86.35	0.696001	0.585925	0.437524	0.31616	0.358507
86.4	0.95321	0.9509	0.94811	0.94471	0.94046		86.4	0.700512	0.591822	0.444492	0.322076	0.36155
86.45	0.95385	0.95158	0.94884	0.94548	0.94131		86.45	0.705002	0.597701	0.451476	0.328093	0.364732
86.5	0.9545	0.95226	0.94956	0.94626	0.94215		86.5	0.709471	0.60356	0.458478	0.33421	0.368055
86.55	0.95515	0.95294	0.95029	0.94704	0.943		86.55	0.713919	0.609402	0.465494	0.340426	0.371517
86.6	0.95579	0.95362	0.95101	0.94782	0.94384		86.6	0.718347	0.615225	0.472526	0.346739	0.375121
86.65	0.95644	0.9543	0.95173	0.94859	0.94468		86.65	0.722756	0.621031	0.479573	0.353149	0.378866
86.7	0.95709	0.95499	0.95246	0.94937	0.94552		86.7	0.727145	0.626819	0.486634	0.359655	0.382753
86.75	0.95773	0.95567	0.95318	0.95014	0.94636		86.75	0.731515	0.632591	0.493708	0.366256	0.386784
86.8	0.95838	0.95635	0.9539	0.95091	0.9472		86.8	0.735868	0.638345	0.500796	0.37295	0.390957
86.85	0.95902	0.95703	0.95462	0.95169	0.94803		86.85	0.740203	0.644084	0.507897	0.379736	0.395274
86.9	0.95967	0.95771	0.95534	0.95246	0.94887		86.9	0.74452	0.649807	0.515011	0.386615	0.399736
86.95	0.96032	0.95839	0.95607	0.95323	0.9497		86.95	0.748821	0.655514	0.522137	0.393585	0.404344
87	0.96096	0.95907	0.95679	0.954	0.95054		87	0.753106	0.661207	0.529276	0.400644	0.409096
87.05	0.96161	0.95975	0.95751	0.95477	0.95137		87.05	0.757375	0.666885	0.536427	0.407794	0.413996
87.1	0.96225	0.96042	0.95823	0.95554	0.9522		87.1	0.761628	0.672549	0.543591	0.415032	0.419042
87.15	0.9629	0.9611	0.95895	0.95631	0.95304		87.15	0.765867	0.6782	0.550766	0.422358	0.424236
87.2	0.96355	0.96178	0.95967	0.95708	0.95387		87.2	0.770092	0.683837	0.557954	0.429773	0.429578
87.25	0.96419	0.96246	0.96038	0.95785	0.9547		87.25	0.774303	0.689463	0.565154	0.437274	0.435069
87.3	0.96484	0.96314	0.9611	0.95862	0.95553		87.3	0.778501	0.695076	0.572367	0.444862	0.440709
87.35	0.96548	0.96382	0.96182	0.95938	0.95636		87.35	0.782686	0.700678	0.579592	0.452537	0.4465
87.4	0.96613	0.9645	0.96254	0.96015	0.95718		87.4	0.786859	0.70627	0.58683	0.460297	0.452442
87.45	0.96678	0.96518	0.96326	0.96092	0.95801		87.45	0.79102	0.711851	0.594081	0.468144	0.458535
87.5	0.96742	0.96586	0.96398	0.96168	0.95884		87.5	0.79517	0.717422	0.601346	0.476076	0.464781
87.55	0.96807	0.96654	0.9647	0.96245	0.95966		87.55	0.799309	0.722985	0.608624	0.484094	0.471181
87.6	0.96872	0.96722	0.96541	0.96322	0.96049		87.6	0.803438	0.728539	0.615916	0.492197	0.477734
87.65	0.96936	0.96789	0.96613	0.96398	0.96132		87.65	0.807557	0.734085	0.623223	0.500385	0.484442
87.7	0.97001	0.96857	0.96685	0.96475	0.96214		87.7	0.811667	0.739624	0.630544	0.508659	0.491306
87.75	0.97066	0.96925	0.96757	0.96551	0.96296		87.75	0.815769	0.745157	0.637881	0.517019	0.498326
87.8	0.9713	0.96993	0.96828	0.96628	0.96379		87.8	0.819862	0.750683	0.645234	0.525465	0.505504
87.85	0.97195	0.97061	0.969	0.96704	0.96461		87.85	0.823947	0.756205	0.652604	0.533997	0.512841
87.9	0.9726	0.97129	0.96972	0.96781	0.96543		87.9	0.828026	0.761721	0.65999	0.542616	0.520337
87.95	0.97324	0.97197	0.97044	0.96857	0.96626		87.95	0.832097	0.767234	0.667395	0.551321	0.527994
88	0.97389	0.97265	0.97115	0.96934	0.96708		88	0.836163	0.772744	0.674818	0.560114	0.535812
88.05	0.97454	0.97333	0.97187	0.9701	0.9679		88.05	0.840223	0.778251	0.68226	0.568995	0.543793
88.1	0.97519	0.97401	0.97259	0.97086	0.96872		88.1	0.844277	0.783757	0.689722	0.577965	0.551938
88.15	0.97583	0.97469	0.97331	0.97163	0.96955		88.15	0.848328	0.789261	0.697205	0.587024	0.560249
88.2	0.97648	0.97537	0.97402	0.97239	0.97037		88.2	0.852374	0.794766	0.70471	0.596174	0.568725
88.25	0.97713	0.97605	0.97474	0.97316	0.97119		88.25	0.856416	0.80027	0.712237	0.605415	0.57737
88.3	0.97778	0.97673	0.97546	0.97392	0.97201		88.3	0.860456	0.805776	0.719788	0.614748	0.586183
88.35	0.97843	0.97741	0.97618	0.97468	0.97283		88.35	0.864493	0.811284	0.727364	0.624174	0.595168
88.4	0.97908	0.97809	0.9769	0.97545	0.97365		88.4	0.868528	0.816794	0.734964	0.633694	0.604324
88.45	0.97973	0.97877	0.97761	0.97621	0.97447		88.45	0.872561	0.822308	0.742592	0.643311	0.613653
88.5	0.98038	0.97945	0.97833	0.97697	0.97529		88.5	0.876594	0.827827	0.750247	0.653024	0.623158
88.55	0.98103	0.98013	0.97905	0.97774	0.97611		88.55	0.880627	0.833351	0.757931	0.662835	0.632839
88.6	0.98168	0.98081	0.97977	0.9785	0.97693		88.6	0.884659	0.83888	0.765645	0.672746	0.642699
88.65	0.98233	0.98149	0.98049	0.97927	0.97775		88.65	0.888692	0.844417	0.77339	0.682759	0.652739
88.7	0.98298	0.98217	0.98121	0.98003	0.97857		88.7	0.892727	0.849961	0.781167	0.692874	0.662961
88.75	0.98363	0.98285	0.98192	0.98079	0.97939		88.75	0.896764	0.855514	0.788978	0.703094	0.673367
88.8	0.98428	0.98354	0.98264	0.98156	0.98022		88.8	0.900802	0.861076	0.796824	0.713421	0.683959
88.85	0.98493	0.98422	0.98336	0.98232	0.98104		88.85	0.904844	0.866649	0.804707	0.723857	0.694738
88.9	0.98558	0.9849	0.98408	0.98309	0.98186		88.9	0.90889	0.872233	0.812627	0.734403	0.705707
88.95	0.98623	0.98558	0.9848	0.98385	0.98268		88.95	0.912939	0.877829	0.820587	0.745062	0.716869
89	0.98689	0.98627	0.98552	0.98462	0.9835		89	0.916993	0.883439	0.828588	0.755837	0.728224

## Sheet: Fig. 3c,d Electric field 
Fig. 3c,d Description: Normalized electric-field intensity distributions of the Au-film SPR structure with and without a BP overlayer. Simulation method: Transfer matrix method Sensing-medium refractive index: nₛ = 1.33 Structures: L = 0, bare-Au SPR L = 8, BP-modified SPR structure X-axis: Distance from prism (nm) Y-axis: Normalized electric-field intensity, |E|²/|E₀|² Notes: The data in Fig. 3c…
(c) L = 0			(d) L = 8
Distance from prism (nm)	normalized electric-field intensity |E|²/|E₀|²		Distance from prism (nm)	normalized electric-field intensity |E|²/|E₀|²
250	4.03353		254.24	4.97107
249.9	4.03771		254.14	4.97774
249.8	4.04189		254.04	4.98442
249.7	4.04607		253.94	4.99112
249.6	4.05026		253.84	4.99782
249.5	4.05445		253.74	5.00452
249.4	4.05864		253.64	5.01124
249.3	4.06284		253.54	5.01797
249.2	4.06705		253.44	5.0247
249.1	4.07126		253.34	5.03145
249	4.07547		253.24	5.0382
248.9	4.07969		253.14	5.04497
248.8	4.08391		253.04	5.05174
248.7	4.08814		252.94	5.05852
248.6	4.09237		252.84	5.06531
248.5	4.0966		252.74	5.07211
248.4	4.10084		252.64	5.07892
248.3	4.10509		252.54	5.08574
248.2	4.10934		252.44	5.09256
248.1	4.11359		252.34	5.0994
248	4.11785		252.24	5.10624
247.9	4.12211		252.14	5.1131
247.8	4.12638		252.04	5.11996
247.7	4.13065		251.94	5.12683
247.6	4.13492		251.84	5.13372
247.5	4.1392		251.74	5.14061
247.4	4.14348		251.64	5.14751
247.3	4.14777		251.54	5.15442
247.2	4.15206		251.44	5.16134
247.1	4.15636		251.34	5.16826
247	4.16066		251.24	5.1752
246.9	4.16497		251.14	5.18215
246.8	4.16928		251.04	5.18911
246.7	4.1736		250.94	5.19607
246.6	4.17791		250.84	5.20305
246.5	4.18224		250.74	5.21003
246.4	4.18657		250.64	5.21702
246.3	4.1909		250.54	5.22403
246.2	4.19524		250.44	5.23104
246.1	4.19958		250.34	5.23806
246	4.20393		250.24	5.24509
245.9	4.20828		250.14	5.25213
245.8	4.21263		250.04	5.25918
245.7	4.21699		249.94	5.26624
245.6	4.22136		249.84	5.27331
245.5	4.22572		249.74	5.28039
245.4	4.2301		249.64	5.28748
245.3	4.23448		249.54	5.29458
245.2	4.23886		249.44	5.30168
245.1	4.24324		249.34	5.3088
245	4.24764		249.24	5.31593
244.9	4.25203		249.14	5.32306
244.8	4.25643		249.04	5.33021
244.7	4.26084		248.94	5.33736
244.6	4.26525		248.84	5.34453
244.5	4.26966		248.74	5.3517
244.4	4.27408		248.64	5.35889
244.3	4.2785		248.54	5.36608
244.2	4.28293		248.44	5.37328
244.1	4.28737		248.34	5.3805
244	4.2918		248.24	5.38772
243.9	4.29624		248.14	5.39495
243.8	4.30069		248.04	5.40219
243.7	4.30514		247.94	5.40944
243.6	4.3096		247.84	5.4167
243.5	4.31406		247.74	5.42398
243.4	4.31852		247.64	5.43126
243.3	4.32299		247.54	5.43855
243.2	4.32747		247.44	5.44585
243.1	4.33194		247.34	5.45316
243	4.33643		247.24	5.46048
242.9	4.34092		247.14	5.46781
242.8	4.34541		247.04	5.47515
242.7	4.34991		246.94	5.4825
242.6	4.35441		246.84	5.48986
242.5	4.35891		246.74	5.49723
242.4	4.36342		246.64	5.5046
242.3	4.36794		246.54	5.51199
242.2	4.37246		246.44	5.51939
242.1	4.37699		246.34	5.5268
242	4.38152		246.24	5.53422
241.9	4.38605		246.14	5.54165
241.8	4.39059		246.04	5.54909
241.7	4.39513		245.94	5.55654
241.6	4.39968		245.84	5.564
241.5	4.40424		245.74	5.57146
241.4	4.40879		245.64	5.57894
241.3	4.41336		245.54	5.58643
241.2	4.41792		245.44	5.59393
241.1	4.4225		245.34	5.60144
241	4.42707		245.24	5.60896
240.9	4.43166		245.14	5.61649
240.8	4.43624		245.04	5.62403
240.7	4.44083		244.94	5.63158
240.6	4.44543		244.84	5.63914
240.5	4.45003		244.74	5.64671
240.4	4.45464		244.64	5.65429
240.3	4.45925		244.54	5.66188
240.2	4.46386		244.44	5.66948
240.1	4.46848		244.34	5.67709
240	4.47311		244.24	5.68471
239.9	4.47774		244.14	5.69234
239.8	4.48237		244.04	5.69998
239.7	4.48701		243.94	5.70763
239.6	4.49165		243.84	5.71529
239.5	4.4963		243.74	5.72296
239.4	4.50095		243.64	5.73065
239.3	4.50561		243.54	5.73834
239.2	4.51028		243.44	5.74604
239.1	4.51494		243.34	5.75376
239	4.51962		243.24	5.76148
238.9	4.52429		243.14	5.76921
238.8	4.52898		243.04	5.77696
238.7	4.53366		242.94	5.78471
238.6	4.53836		242.84	5.79248
238.5	4.54305		242.74	5.80025
238.4	4.54775		242.64	5.80804
238.3	4.55246		242.54	5.81583
238.2	4.55717		242.44	5.82364
238.1	4.56189		242.34	5.83146
238	4.56661		242.24	5.83929
237.9	4.57134		242.14	5.84713
237.8	4.57607		242.04	5.85497
237.7	4.5808		241.94	5.86283
237.6	4.58554		241.84	5.8707
237.5	4.59029		241.74	5.87858
237.4	4.59504		241.64	5.88648
237.3	4.5998		241.54	5.89438
237.2	4.60456		241.44	5.90229
237.1	4.60932		241.34	5.91021
237	4.61409		241.24	5.91815
236.9	4.61887		241.14	5.92609
236.8	4.62365		241.04	5.93404
236.7	4.62843		240.94	5.94201
236.6	4.63322		240.84	5.94999
236.5	4.63802		240.74	5.95797
236.4	4.64282		240.64	5.96597
236.3	4.64762		240.54	5.97398
236.2	4.65243		240.44	5.982
236.1	4.65725		240.34	5.99003
236	4.66207		240.24	5.99807
235.9	4.66689		240.14	6.00612
235.8	4.67172		240.04	6.01418
235.7	4.67656		239.94	6.02226
235.6	4.6814		239.84	6.03034
235.5	4.68624		239.74	6.03843
235.4	4.69109		239.64	6.04654
235.3	4.69595		239.54	6.05466
235.2	4.70081		239.44	6.06278
235.1	4.70567		239.34	6.07092
235	4.71054		239.24	6.07907
234.9	4.71542		239.14	6.08723
234.8	4.7203		239.04	6.0954
234.7	4.72518		238.94	6.10359
234.6	4.73007		238.84	6.11178
234.5	4.73497		238.74	6.11998
234.4	4.73987		238.64	6.1282
234.3	4.74478		238.54	6.13642
234.2	4.74969		238.44	6.14466
234.1	4.7546		238.34	6.15291
234	4.75952		238.24	6.16117
233.9	4.76445		238.14	6.16944
233.8	4.76938		238.04	6.17772
233.7	4.77431		237.94	6.18601
233.6	4.77926		237.84	6.19432
233.5	4.7842		237.74	6.20263
233.4	4.78915		237.64	6.21096
233.3	4.79411		237.54	6.2193
233.2	4.79907		237.44	6.22764
233.1	4.80404		237.34	6.236
233	4.80901		237.24	6.24437
232.9	4.81399		237.14	6.25276
232.8	4.81897		237.04	6.26115
232.7	4.82396		236.94	6.26955
232.6	4.82895		236.84	6.27797
232.5	4.83395		236.74	6.2864
232.4	4.83895		236.64	6.29484
232.3	4.84396		236.54	6.30329
232.2	4.84897		236.44	6.31175
232.1	4.85399		236.34	6.32022
232	4.85901		236.24	6.3287
231.9	4.86404		236.14	6.3372
231.8	4.86908		236.04	6.34571
231.7	4.87411		235.94	6.35422
231.6	4.87916		235.84	6.36275
231.5	4.88421		235.74	6.37129
231.4	4.88926		235.64	6.37985
231.3	4.89432		235.54	6.38841
231.2	4.89939		235.44	6.39699
231.1	4.90446		235.34	6.40557
231	4.90954		235.24	6.41417
230.9	4.91462		235.14	6.42278
230.8	4.9197		235.04	6.4314
230.7	4.92479		234.94	6.44004
230.6	4.92989		234.84	6.44868
230.5	4.93499		234.74	6.45734
230.4	4.9401		234.64	6.46601
230.3	4.94521		234.54	6.47469
230.2	4.95033		234.44	6.48338
230.1	4.95546		234.34	6.49208
230	4.96058		234.24	6.50079
229.9	4.96572		234.14	6.50952
229.8	4.97086		234.04	6.51826
229.7	4.976		233.94	6.52701
229.6	4.98115		233.84	6.53577
229.5	4.98631		233.74	6.54454
229.4	4.99147		233.64	6.55333
229.3	4.99663		233.54	6.56213
229.2	5.0018		233.44	6.57093
229.1	5.00698		233.34	6.57975
229	5.01216		233.24	6.58859
228.9	5.01735		233.14	6.59743
228.8	5.02254		233.04	6.60629
228.7	5.02774		232.94	6.61515
228.6	5.03294		232.84	6.62403
228.5	5.03815		232.74	6.63293
228.4	5.04337		232.64	6.64183
228.3	5.04859		232.54	6.65075
228.2	5.05381		232.44	6.65967
228.1	5.05904		232.34	6.66861
228	5.06428		232.24	6.67756
227.9	5.06952		232.14	6.68653
227.8	5.07477		232.04	6.6955
227.7	5.08002		231.94	6.70449
227.6	5.08528		231.84	6.71349
227.5	5.09054		231.74	6.7225
227.4	5.09581		231.64	6.73153
227.3	5.10108		231.54	6.74056
227.2	5.10636		231.44	6.74961
227.1	5.11164		231.34	6.75867
227	5.11693		231.24	6.76774
226.9	5.12223		231.14	6.77683
226.8	5.12753		231.04	6.78593
226.7	5.13284		230.94	6.79503
226.6	5.13815		230.84	6.80416
226.5	5.14347		230.74	6.81329
226.4	5.14879		230.64	6.82244
226.3	5.15412		230.54	6.83159
226.2	5.15945		230.44	6.84076
226.1	5.16479		230.34	6.84995
226	5.17014		230.24	6.85914
225.9	5.17549		230.14	6.86835
225.8	5.18085		230.04	6.87757
225.7	5.18621		229.94	6.8868
225.6	5.19158		229.84	6.89605
225.5	5.19695		229.74	6.9053
225.4	5.20233		229.64	6.91457
225.3	5.20771		229.54	6.92385
225.2	5.2131		229.44	6.93315
225.1	5.2185		229.34	6.94245
225	5.2239		229.24	6.95177
224.9	5.2293		229.14	6.9611
224.8	5.23472		229.04	6.97045
224.7	5.24013		228.94	6.97981
224.6	5.24556		228.84	6.98918
224.5	5.25099		228.74	6.99856
224.4	5.25642		228.64	7.00795
224.3	5.26186		228.54	7.01736
224.2	5.26731		228.44	7.02678
224.1	5.27276		228.34	7.03621
224	5.27821		228.24	7.04566
223.9	5.28368		228.14	7.05511
223.8	5.28914		228.04	7.06458
223.7	5.29462		227.94	7.07407
223.6	5.3001		227.84	7.08356
223.5	5.30558		227.74	7.09307
223.4	5.31107		227.64	7.10259
223.3	5.31657		227.54	7.11213
223.2	5.32207		227.44	7.12167
223.1	5.32758		227.34	7.13123
223	5.3331		227.24	7.14081
222.9	5.33861		227.14	7.15039
222.8	5.34414		227.04	7.15999
222.7	5.34967		226.94	7.1696
222.6	5.35521		226.84	7.17923
222.5	5.36075		226.74	7.18886
222.4	5.3663		226.64	7.19851
222.3	5.37185		226.54	7.20818
222.2	5.37741		226.44	7.21785
222.1	5.38298		226.34	7.22754
222	5.38855		226.24	7.23724
221.9	5.39412		226.14	7.24696
221.8	5.39971		226.04	7.25668
221.7	5.4053		225.94	7.26643
221.6	5.41089		225.84	7.27618
221.5	5.41649		225.74	7.28595
221.4	5.42209		225.64	7.29573
221.3	5.42771		225.54	7.30552
221.2	5.43332		225.44	7.31533
221.1	5.43895		225.34	7.32515
221	5.44458		225.24	7.33498
220.9	5.45021		225.14	7.34483
220.8	5.45585		225.04	7.35468
220.7	5.4615		224.94	7.36456
220.6	5.46715		224.84	7.37444
220.5	5.47281		224.74	7.38434
220.4	5.47847		224.64	7.39425
220.3	5.48414		224.54	7.40418
220.2	5.48982		224.44	7.41412
220.1	5.4955		224.34	7.42407
220	5.50119		224.24	7.43404
219.9	5.50688		224.14	7.44402
219.8	5.51258		224.04	7.45401
219.7	5.51829		223.94	7.46401
219.6	5.524		223.84	7.47403
219.5	5.52971		223.74	7.48407
219.4	5.53544		223.64	7.49411
219.3	5.54116		223.54	7.50417
219.2	5.5469		223.44	7.51425
219.1	5.55264		223.34	7.52433
219	5.55839		223.24	7.53443
218.9	5.56414		223.14	7.54455
218.8	5.5699		223.04	7.55467
218.7	5.57566		222.94	7.56482
218.6	5.58143		222.84	7.57497
218.5	5.58721		222.74	7.58514
218.4	5.59299		222.64	7.59532
218.3	5.59878		222.54	7.60552
218.2	5.60457		222.44	7.61572
218.1	5.61038		222.34	7.62595
218	5.61618		222.24	7.63618
217.9	5.62199		222.14	7.64643
217.8	5.62781		222.04	7.6567
217.7	5.63364		221.94	7.66698
217.6	5.63947		221.84	7.67727
217.5	5.6453		221.74	7.68757
217.4	5.65115		221.64	7.69789
217.3	5.657		221.54	7.70823
217.2	5.66285		221.44	7.71857
217.1	5.66871		221.34	7.72893
217	5.67458		221.24	7.73931
216.9	5.68045		221.14	7.7497
216.8	5.68633		221.04	7.7601
216.7	5.69221		220.94	7.77052
216.6	5.69811		220.84	7.78095
216.5	5.704		220.74	7.79139
216.4	5.70991		220.64	7.80185
216.3	5.71582		220.54	7.81233
216.2	5.72173		220.44	7.82281
216.1	5.72765		220.34	7.83331
216	5.73358		220.24	7.84383
215.9	5.73951		220.14	7.85436
215.8	5.74545		220.04	7.8649
215.7	5.7514		219.94	7.87546
215.6	5.75735		219.84	7.88603
215.5	5.76331		219.74	7.89662
215.4	5.76928		219.64	7.90722
215.3	5.77525		219.54	7.91783
215.2	5.78122		219.44	7.92846
215.1	5.78721		219.34	7.9391
215	5.7932		219.24	7.94976
214.9	5.79919		219.14	7.96043
214.8	5.80519		219.04	7.97111
214.7	5.8112		218.94	7.98181
214.6	5.81722		218.84	7.99253
214.5	5.82324		218.74	8.00326
214.4	5.82926		218.64	8.014
214.3	5.8353		218.54	8.02476
214.2	5.84134		218.44	8.03553
214.1	5.84738		218.34	8.04632
214	5.85343		218.24	8.05712
213.9	5.85949		218.14	8.06793
213.8	5.86555		218.04	8.07876
213.7	5.87162		217.94	8.08961
213.6	5.8777		217.84	8.10047
213.5	5.88378		217.74	8.11134
213.4	5.88987		217.64	8.12223
213.3	5.89597		217.54	8.13313
213.2	5.90207		217.44	8.14405
213.1	5.90818		217.34	8.15498
213	5.91429		217.24	8.16593
212.9	5.92042		217.14	8.17689
212.8	5.92654		217.04	8.18787
212.7	5.93268		216.94	8.19886
212.6	5.93882		216.84	8.20986
212.5	5.94496		216.74	8.22088
212.4	5.95112		216.64	8.23192
212.3	5.95727		216.54	8.24297
212.2	5.96344		216.44	8.25403
212.1	5.96961		216.34	8.26511
212	5.97579		216.24	8.27621
211.9	5.98197		216.14	8.28732
211.8	5.98817		216.04	8.29844
211.7	5.99436		215.94	8.30958
211.6	6.00057		215.84	8.32074
211.5	6.00678		215.74	8.3319
211.4	6.01299		215.64	8.34309
211.3	6.01922		215.54	8.35429
211.2	6.02545		215.44	8.3655
211.1	6.03168		215.34	8.37673
211	6.03792		215.24	8.38798
210.9	6.04417		215.14	8.39924
210.8	6.05043		215.04	8.41051
210.7	6.05669		214.94	8.4218
210.6	6.06296		214.84	8.43311
210.5	6.06923		214.74	8.44443
210.4	6.07552		214.64	8.45576
210.3	6.0818		214.54	8.46711
210.2	6.0881		214.44	8.47848
210.1	6.0944		214.34	8.48986
210	6.10071		214.24	8.50125
209.9	6.10702		214.14	8.51267
209.8	6.11334		214.04	8.52409
209.7	6.11967		213.94	8.53554
209.6	6.126		213.84	8.54699
209.5	6.13234		213.74	8.55847
209.4	6.13869		213.64	8.56995
209.3	6.14504		213.54	8.58146
209.2	6.1514		213.44	8.59298
209.1	6.15777		213.34	8.60451
209	6.16414		213.24	8.61606
208.9	6.17052		213.14	8.62763
208.8	6.1769		213.04	8.63921
208.7	6.1833		212.94	8.65081
208.6	6.1897		212.84	8.66242
208.5	6.1961		212.74	8.67405
208.4	6.20252		212.64	8.68569
208.3	6.20893		212.54	8.69735
208.2	6.21536		212.44	8.70902
208.1	6.22179		212.34	8.72072
208	6.22823		212.24	8.73242
207.9	6.23468		212.14	8.74414
207.8	6.24113		212.04	8.75588
207.7	6.24759		211.94	8.76763
207.6	6.25406		211.84	8.7794
207.5	6.26053		211.74	8.79119
207.4	6.26701		211.64	8.80299
207.3	6.27349		211.54	8.81481
207.2	6.27999		211.44	8.82664
207.1	6.28649		211.34	8.83849
207	6.29299		211.24	8.85035
206.9	6.2995		211.14	8.86223
206.8	6.30602		211.04	8.87413
206.7	6.31255		210.94	8.88604
206.6	6.31908		210.84	8.89797
206.5	6.32562		210.74	8.90991
206.4	6.33217		210.64	8.92187
206.3	6.33872		210.54	8.93385
206.2	6.34528		210.44	8.94584
206.1	6.35185		210.34	8.95785
206	6.35842		210.24	8.96987
205.9	6.365		210.14	8.98191
205.8	6.37159		210.04	8.99397
205.7	6.37819		209.94	9.00604
205.6	6.38479		209.84	9.01813
205.5	6.3914		209.74	9.03024
205.4	6.39801		209.64	9.04236
205.3	6.40463		209.54	9.0545
205.2	6.41126		209.44	9.06665
205.1	6.4179		209.34	9.07882
205	6.42454		209.24	9.09101
204.9	6.43119		209.14	9.10321
204.8	6.43784		209.04	9.11543
204.7	6.44451		208.94	9.12767
204.6	6.45117		208.84	9.13992
204.5	6.45785		208.74	9.15219
204.4	6.46453		208.64	9.16448
204.3	6.47123		208.54	9.17678
204.2	6.47792		208.44	9.1891
204.1	6.48463		208.34	9.20143
204	6.49134		208.24	9.21378
203.9	6.49806		208.14	9.22615
203.8	6.50478		208.04	9.23854
203.7	6.51151		207.94	9.25094
203.6	6.51825		207.84	9.26336
203.5	6.525		207.74	9.27579
203.4	6.53175		207.64	9.28824
203.3	6.53851		207.54	9.30071
203.2	6.54528		207.44	9.31319
203.1	6.55205		207.34	9.3257
203	6.55883		207.24	9.33821
202.9	6.56562		207.14	9.35075
202.8	6.57242		207.04	9.3633
202.7	6.57922		206.94	9.37587
202.6	6.58603		206.84	9.38846
202.5	6.59284		206.74	9.40106
202.4	6.59967		206.64	9.41368
202.3	6.6065		206.54	9.42631
202.2	6.61333		206.44	9.43897
202.1	6.62018		206.34	9.45164
202	6.62703		206.24	9.46433
201.9	6.63389		206.14	9.47703
201.8	6.64075		206.04	9.48975
201.7	6.64763		205.94	9.50249
201.6	6.65451		205.84	9.51525
201.5	6.66139		205.74	9.52802
201.4	6.66829		205.64	9.54081
201.3	6.67519		205.54	9.55362
201.2	6.6821		205.44	9.56644
201.1	6.68901		205.34	9.57928
201	6.69594		205.24	9.59214
200.9	6.70287		205.14	9.60502
200.8	6.7098		205.04	9.61791
200.7	6.71675		204.94	9.63082
200.6	6.7237		204.84	9.64375
200.5	6.73066		204.74	9.65669
200.4	6.73762		204.64	9.66966
200.3	6.7446		204.54	9.68264
200.2	6.75158		204.44	9.69563
200.1	6.75856		204.34	9.70865
200	6.76556		204.24	9.72168
199.9	6.77256		204.14	9.73473
199.8	6.77957		204.04	9.7478
199.7	6.78659		203.94	9.76088
199.6	6.79361		203.84	9.77398
199.5	6.80064		203.74	9.7871
199.4	6.80768		203.64	9.80024
199.3	6.81473		203.54	9.8134
199.2	6.82178		203.44	9.82657
199.1	6.82884		203.34	9.83976
199	6.83591		203.24	9.85297
198.9	6.84298		203.14	9.8662
198.8	6.85006		203.04	9.87944
198.7	6.85715		202.94	9.8927
198.6	6.86425		202.84	9.90598
198.5	6.87135		202.74	9.91928
198.4	6.87846		202.64	9.93259
198.3	6.88558		202.54	9.94593
198.2	6.89271		202.44	9.95928
198.1	6.89984		202.34	9.97265
198	6.90698		202.24	9.98603
197.9	6.91413		202.14	9.99944
197.8	6.92129		202.04	10.0129
197.7	6.92845		201.94	10.0263
197.6	6.93562		201.84	10.0398
197.5	6.9428		201.74	10.0532
197.4	6.94998		201.64	10.0667
197.3	6.95718		201.54	10.0802
197.2	6.96438		201.44	10.0938
197.1	6.97159		201.34	10.1073
197	6.9788		201.24	10.1209
196.9	6.98602		201.14	10.1345
196.8	6.99325		201.04	10.1481
196.7	7.00049		200.94	10.1617
196.6	7.00774		200.84	10.1753
196.5	7.01499		200.74	10.189
196.4	7.02225		200.64	10.2027
196.3	7.02952		200.54	10.2164
196.2	7.03679		200.44	10.2301
196.1	7.04407		200.34	10.2438
196	7.05136		200.24	10.2576
195.9	7.05866		200.14	10.2713
195.8	7.06597		200.04	10.2851
195.7	7.07328		199.94	10.2989
195.6	7.0806		199.84	10.3128
195.5	7.08793		199.74	10.3266
195.4	7.09526		199.64	10.3405
195.3	7.10261		199.54	10.3543
195.2	7.10996		199.44	10.3682
195.1	7.11732		199.34	10.3822
195	7.12468		199.24	10.3961
194.9	7.13206		199.14	10.4101
194.8	7.13944		199.04	10.424
194.7	7.14683		198.94	10.438
194.6	7.15422		198.84	10.452
194.5	7.16163		198.74	10.4661
194.4	7.16904		198.64	10.4801
194.3	7.17646		198.54	10.4942
194.2	7.18389		198.44	10.5083
194.1	7.19132		198.34	10.5224
194	7.19876		198.24	10.5365
193.9	7.20621		198.14	10.5506
193.8	7.21367		198.04	10.5648
193.7	7.22114		197.94	10.579
193.6	7.22861		197.84	10.5932
193.5	7.23609		197.74	10.6074
193.4	7.24358		197.64	10.6216
193.3	7.25108		197.54	10.6359
193.2	7.25858		197.44	10.6502
193.1	7.26609		197.34	10.6645
193	7.27361		197.24	10.6788
192.9	7.28114		197.14	10.6931
192.8	7.28868		197.04	10.7075
192.7	7.29622		196.94	10.7219
192.6	7.30377		196.84	10.7362
192.5	7.31133		196.74	10.7507
192.4	7.3189		196.64	10.7651
192.3	7.32647		196.54	10.7795
192.2	7.33405		196.44	10.794
192.1	7.34164		196.34	10.8085
192	7.34924		196.24	10.823
191.9	7.35685		196.14	10.8375
191.8	7.36446		196.04	10.8521
191.7	7.37208		195.94	10.8667
191.6	7.37971		195.84	10.8812
191.5	7.38735		195.74	10.8958
191.4	7.395		195.64	10.9105
191.3	7.40265		195.54	10.9251
191.2	7.41031		195.44	10.9398
191.1	7.41798		195.34	10.9545
191	7.42566		195.24	10.9692
190.9	7.43334		195.14	10.9839
190.8	7.44104		195.04	10.9986
190.7	7.44874		194.94	11.0134
190.6	7.45645		194.84	11.0282
190.5	7.46416		194.74	11.043
190.4	7.47189		194.64	11.0578
190.3	7.47962		194.54	11.0727
190.2	7.48736		194.44	11.0875
190.1	7.49511		194.34	11.1024
190	7.50287		194.24	11.1173
189.9	7.51063		194.14	11.1322
189.8	7.51841		194.04	11.1472
189.7	7.52619		193.94	11.1621
189.6	7.53398		193.84	11.1771
189.5	7.54177		193.74	11.1921
189.4	7.54958		193.64	11.2071
189.3	7.55739		193.54	11.2222
189.2	7.56521		193.44	11.2373
189.1	7.57304		193.34	11.2523
189	7.58088		193.24	11.2674
188.9	7.58873		193.14	11.2826
188.8	7.59658		193.04	11.2977
188.7	7.60444		192.94	11.3129
188.6	7.61231		192.84	11.3281
188.5	7.62019		192.74	11.3433
188.4	7.62808		192.64	11.3585
188.3	7.63597		192.54	11.3737
188.2	7.64387		192.44	11.389
188.1	7.65179		192.34	11.4043
188	7.6597		192.24	11.4196
187.9	7.66763		192.14	11.4349
187.8	7.67557		192.04	11.4503
187.7	7.68351		191.94	11.4657
187.6	7.69146		191.84	11.481
187.5	7.69942		191.74	11.4965
187.4	7.70739		191.64	11.5119
187.3	7.71537		191.54	11.5273
187.2	7.72335		191.44	11.5428
187.1	7.73135		191.34	11.5583
187	7.73935		191.24	11.5738
186.9	7.74736		191.14	11.5894
186.8	7.75538		191.04	11.6049
186.7	7.7634		190.94	11.6205
186.6	7.77144		190.84	11.6361
186.5	7.77948		190.74	11.6517
186.4	7.78753		190.64	11.6674
186.3	7.79559		190.54	11.683
186.2	7.80366		190.44	11.6987
186.1	7.81174		190.34	11.7144
186	7.81982		190.24	11.7301
185.9	7.82791		190.14	11.7459
185.8	7.83601		190.04	11.7616
185.7	7.84412		189.94	11.7774
185.6	7.85224		189.84	11.7932
185.5	7.86037		189.74	11.8091
185.4	7.8685		189.64	11.8249
185.3	7.87665		189.54	11.8408
185.2	7.8848		189.44	11.8567
185.1	7.89296		189.34	11.8726
185	7.90113		189.24	11.8885
184.9	7.90931		189.14	11.9045
184.8	7.91749		189.04	11.9205
184.7	7.92569		188.94	11.9365
184.6	7.93389		188.84	11.9525
184.5	7.9421		188.74	11.9686
184.4	7.95032		188.64	11.9846
184.3	7.95855		188.54	12.0007
184.2	7.96678		188.44	12.0168
184.1	7.97503		188.34	12.0329
184	7.98328		188.24	12.0491
183.9	7.99154		188.14	12.0653
183.8	7.99982		188.04	12.0815
183.7	8.00809		187.94	12.0977
183.6	8.01638		187.84	12.1139
183.5	8.02468		187.74	12.1302
183.4	8.03298		187.64	12.1465
183.3	8.0413		187.54	12.1628
183.2	8.04962		187.44	12.1791
183.1	8.05795		187.34	12.1955
183	8.06629		187.24	12.2118
182.9	8.07464		187.14	12.2282
182.8	8.083		187.04	12.2446
182.7	8.09136		186.94	12.2611
182.6	8.09973		186.84	12.2775
182.5	8.10812		186.74	12.294
182.4	8.11651		186.64	12.3105
182.3	8.12491		186.54	12.327
182.2	8.13332		186.44	12.3436
182.1	8.14174		186.34	12.3601
182	8.15016		186.24	12.3767
181.9	8.1586		186.14	12.3934
181.8	8.16704		186.04	12.41
181.7	8.17549		185.94	12.4266
181.6	8.18395		185.84	12.4433
181.5	8.19242		185.74	12.46
181.4	8.2009		185.64	12.4768
181.3	8.20939		185.54	12.4935
181.2	8.21789		185.44	12.5103
181.1	8.22639		185.34	12.5271
181	8.2349		185.24	12.5439
180.9	8.24343		185.14	12.5607
180.8	8.25196		185.04	12.5776
180.7	8.2605		184.94	12.5945
180.6	8.26905		184.84	12.6114
180.5	8.27761		184.74	12.6283
180.4	8.28617		184.64	12.6453
180.3	8.29475		184.54	12.6622
180.2	8.30333		184.44	12.6792
180.1	8.31193		184.34	12.6962
180	8.32053		184.24	12.7133
179.9	8.32914		184.14	12.7304
179.8	8.33776		184.04	12.7474
179.7	8.34639		183.94	12.7646
179.6	8.35503		183.84	12.7817
179.5	8.36367		183.74	12.7988
179.4	8.37233		183.64	12.816
179.3	8.381		183.54	12.8332
179.2	8.38967		183.44	12.8505
179.1	8.39835		183.34	12.8677
179	8.40704		183.24	12.885
178.9	8.41574		183.14	12.9023
178.8	8.42445		183.04	12.9196
178.7	8.43317		182.94	12.9369
178.6	8.4419		182.84	12.9543
178.5	8.45064		182.74	12.9717
178.4	8.45938		182.64	12.9891
178.3	8.46814		182.54	13.0065
178.2	8.4769		182.44	13.024
178.1	8.48568		182.34	13.0415
178	8.49446		182.24	13.059
177.9	8.50325		182.14	13.0765
177.8	8.51205		182.04	13.0941
177.7	8.52086		181.94	13.1116
177.6	8.52968		181.84	13.1292
177.5	8.53851		181.74	13.1469
177.4	8.54734		181.64	13.1645
177.3	8.55619		181.54	13.1822
177.2	8.56504		181.44	13.1999
177.1	8.57391		181.34	13.2176
177	8.58278		181.24	13.2353
176.9	8.59166		181.14	13.2531
176.8	8.60056		181.04	13.2709
176.7	8.60946		180.94	13.2887
176.6	8.61837		180.84	13.3066
176.5	8.62729		180.74	13.3244
176.4	8.63622		180.64	13.3423
176.3	8.64515		180.54	13.3602
176.2	8.6541		180.44	13.3782
176.1	8.66306		180.34	13.3961
176	8.67202		180.24	13.4141
175.9	8.681		180.14	13.4321
175.8	8.68998		180.04	13.4501
175.7	8.69898		179.94	13.4682
175.6	8.70798		179.84	13.4863
175.5	8.71699		179.74	13.5044
175.4	8.72601		179.64	13.5225
175.3	8.73504		179.54	13.5406
175.2	8.74408		179.44	13.5588
175.1	8.75313		179.34	13.577
175	8.76219		179.24	13.5952
174.9	8.77126		179.14	13.6135
174.8	8.78034		179.04	13.6318
174.7	8.78943		178.94	13.6501
174.6	8.79852		178.84	13.6684
174.5	8.80763		178.74	13.6867
174.4	8.81674		178.64	13.7051
174.3	8.82587		178.54	13.7235
174.2	8.835		178.44	13.7419
174.1	8.84415		178.34	13.7604
174	8.8533		178.24	13.7788
173.9	8.86246		178.14	13.7973
173.8	8.87163		178.04	13.8159
173.7	8.88082		177.94	13.8344
173.6	8.89001		177.84	13.853
173.5	8.89921		177.74	13.8716
173.4	8.90842		177.64	13.8902
173.3	8.91764		177.54	13.9088
173.2	8.92687		177.44	13.9275
173.1	8.9361		177.34	13.9462
173	8.94535		177.24	13.9649
172.9	8.95461		177.14	13.9837
172.8	8.96388		177.04	14.0024
172.7	8.97316		176.94	14.0212
172.6	8.98244		176.84	14.0401
172.5	8.99174		176.74	14.0589
172.4	9.00104		176.64	14.0778
172.3	9.01036		176.54	14.0967
172.2	9.01969		176.44	14.1156
172.1	9.02902		176.34	14.1345
172	9.03836		176.24	14.1535
171.9	9.04772		176.14	14.1725
171.8	9.05708		176.04	14.1915
171.7	9.06646		175.94	14.2106
171.6	9.07584		175.84	14.2297
171.5	9.08523		175.74	14.2488
171.4	9.09463		175.64	14.2679
171.3	9.10405		175.54	14.2871
171.2	9.11347		175.44	14.3062
171.1	9.1229		175.34	14.3254
171	9.13234		175.24	14.3447
170.9	9.14179		175.14	14.3639
170.8	9.15126		175.04	14.3832
170.7	9.16073		174.94	14.4025
170.6	9.17021		174.84	14.4218
170.5	9.1797		174.74	14.4412
170.4	9.1892		174.64	14.4606
170.3	9.19871		174.54	14.48
170.2	9.20823		174.44	14.4994
170.1	9.21776		174.34	14.5189
170	9.2273		174.24	14.5384
169.9	9.23685		174.14	14.5579
169.8	9.24641		174.04	14.5774
169.7	9.25598		173.94	14.597
169.6	9.26556		173.84	14.6166
169.5	9.27515		173.74	14.6362
169.4	9.28475		173.64	14.6559
169.3	9.29435		173.54	14.6755
169.2	9.30397		173.44	14.6952
169.1	9.3136		173.34	14.715
169	9.32324		173.24	14.7347
168.9	9.33289		173.14	14.7545
168.8	9.34255		173.04	14.7743
168.7	9.35222		172.94	14.7941
168.6	9.3619		172.84	14.814
168.5	9.37159		172.74	14.8339
168.4	9.38129		172.64	14.8538
168.3	9.39099		172.54	14.8737
168.2	9.40071		172.44	14.8937
168.1	9.41044		172.34	14.9137
168	9.42018		172.24	14.9337
167.9	9.42993		172.14	14.9538
167.8	9.43969		172.04	14.9738
167.7	9.44946		171.94	14.9939
167.6	9.45924		171.84	15.0141
167.5	9.46903		171.74	15.0342
167.4	9.47883		171.64	15.0544
167.3	9.48864		171.54	15.0746
167.2	9.49846		171.44	15.0948
167.1	9.50829		171.34	15.1151
167	9.51813		171.24	15.1354
166.9	9.52798		171.14	15.1557
166.8	9.53784		171.04	15.1761
166.7	9.54771		170.94	15.1964
166.6	9.55759		170.84	15.2168
166.5	9.56749		170.74	15.2373
166.4	9.57739		170.64	15.2577
166.3	9.5873		170.54	15.2782
166.2	9.59722		170.44	15.2987
166.1	9.60715		170.34	15.3192
166	9.6171		170.24	15.3398
165.9	9.62705		170.14	15.3604
165.8	9.63701		170.04	15.381
165.7	9.64699		169.94	15.4017
165.6	9.65697		169.84	15.4223
165.5	9.66697		169.74	15.443
165.4	9.67697		169.64	15.4638
165.3	9.68699		169.54	15.4845
165.2	9.69701		169.44	15.5053
165.1	9.70705		169.34	15.5261
165	9.71709		169.24	15.547
164.9	9.72715		169.14	15.5678
164.8	9.73722		169.04	15.5887
164.7	9.74729		168.94	15.6096
164.6	9.75738		168.84	15.6306
164.5	9.76748		168.74	15.6516
164.4	9.77759		168.64	15.6726
164.3	9.78771		168.54	15.6936
164.2	9.79784		168.44	15.7147
164.1	9.80798		168.34	15.7358
164	9.81813		168.24	15.7569
163.9	9.82829		168.14	15.7781
163.8	9.83846		168.04	15.7992
163.7	9.84864		167.94	15.8205
163.6	9.85884		167.84	15.8417
163.5	9.86904		167.74	15.863
163.4	9.87925		167.64	15.8842
163.3	9.88948		167.54	15.9056
163.2	9.89971		167.44	15.9269
163.1	9.90996		167.34	15.9483
163	9.92022		167.24	15.9697
162.9	9.93048		167.14	15.9911
162.8	9.94076		167.04	16.0126
162.7	9.95105		166.94	16.0341
162.6	9.96135		166.84	16.0556
162.5	9.97166		166.74	16.0772
162.4	9.98198		166.64	16.0988
162.3	9.99231		166.54	16.1204
162.2	10.0026		166.44	16.142
162.1	10.013		166.34	16.1637
162	10.0234		166.24	16.1854
161.9	10.0337		166.14	16.2071
161.8	10.0441		166.04	16.2289
161.7	10.0545		165.94	16.2506
161.6	10.0649		165.84	16.2725
161.5	10.0753		165.74	16.2943
161.4	10.0858		165.64	16.3162
161.3	10.0962		165.54	16.3381
161.2	10.1067		165.44	16.36
161.1	10.1171		165.34	16.382
161	10.1276		165.24	16.404
160.9	10.1381		165.14	16.426
160.8	10.1486		165.04	16.448
160.7	10.1591		164.94	16.4701
160.6	10.1696		164.84	16.4922
160.5	10.1801		164.74	16.5144
160.4	10.1906		164.64	16.5365
160.3	10.2012		164.54	16.5587
160.2	10.2117		164.44	16.5809
160.1	10.2223		164.34	16.6032
160	10.2329		164.24	16.6255
159.9	10.2435		164.14	16.6478
159.8	10.2541		164.04	16.6702
159.7	10.2647		163.94	16.6925
159.6	10.2753		163.84	16.7149
159.5	10.2859		163.74	16.7374
159.4	10.2966		163.64	16.7598
159.3	10.3073		163.54	16.7823
159.2	10.3179		163.44	16.8049
159.1	10.3286		163.34	16.8274
159	10.3393		163.24	16.85
158.9	10.35		163.14	16.8726
158.8	10.3607		163.04	16.8953
158.7	10.3714		162.94	16.918
158.6	10.3822		162.84	16.9407
158.5	10.3929		162.74	16.9634
158.4	10.4037		162.64	16.9862
158.3	10.4144		162.54	17.009
158.2	10.4252		162.44	17.0318
158.1	10.436		162.34	17.0547
158	10.4468		162.24	17.0776
157.9	10.4576		162.14	17.1005
157.8	10.4684		162.04	17.1235
157.7	10.4793		161.94	17.1464
157.6	10.4901		161.84	17.1695
157.5	10.501		161.74	17.1925
157.4	10.5118		161.64	17.2156
157.3	10.5227		161.54	17.2387
157.2	10.5336		161.44	17.2618
157.1	10.5445		161.34	17.285
157	10.5554		161.24	17.3082
156.9	10.5663		161.14	17.3314
156.8	10.5773		161.04	17.3547
156.7	10.5882		160.94	17.378
156.6	10.5992		160.84	17.4013
156.5	10.6101		160.74	17.4247
156.4	10.6211		160.64	17.4481
156.3	10.6321		160.54	17.4715
156.2	10.6431		160.44	17.4949
156.1	10.6541		160.34	17.5184
156	10.6652		160.24	17.5419
155.9	10.6762		160.14	17.5655
155.8	10.6873		160.04	17.5891
155.7	10.6983		159.94	17.6127
155.6	10.7094		159.84	17.6363
155.5	10.7205		159.74	17.66
155.4	10.7316		159.64	17.6837
155.3	10.7427		159.54	17.7074
155.2	10.7538		159.44	17.7312
155.1	10.7649		159.34	17.755
155	10.7761		159.24	17.7788
154.9	10.7872		159.14	17.8027
154.8	10.7984		159.04	17.8266
154.7	10.8096		158.94	17.8505
154.6	10.8207		158.84	17.8745
154.5	10.8319		158.74	17.8985
154.4	10.8431		158.64	17.9225
154.3	10.8544		158.54	17.9466
154.2	10.8656		158.44	17.9707
154.1	10.8769		158.34	17.9948
154	10.8881		158.24	18.0189
153.9	10.8994		158.14	18.0431
153.8	10.9107		158.04	18.0674
153.7	10.9219		157.94	18.0916
153.6	10.9333		157.84	18.1159
153.5	10.9446		157.74	18.1402
153.4	10.9559		157.64	18.1646
153.3	10.9672		157.54	18.1889
153.2	10.9786		157.44	18.2134
153.1	10.9899		157.34	18.2378
153	11.0013		157.24	18.2623
152.9	11.0127		157.14	18.2868
152.8	11.0241		157.04	18.3114
152.7	11.0355		156.94	18.3359
152.6	11.0469		156.84	18.3605
152.5	11.0584		156.74	18.3852
152.4	11.0698		156.64	18.4099
152.3	11.0813		156.54	18.4346
152.2	11.0927		156.44	18.4593
152.1	11.1042		156.34	18.4841
152	11.1157		156.24	18.5089
151.9	11.1272		156.14	18.5338
151.8	11.1387		156.04	18.5586
151.7	11.1503		155.94	18.5836
151.6	11.1618		155.84	18.6085
151.5	11.1733		155.74	18.6335
151.4	11.1849		155.64	18.6585
151.3	11.1965		155.54	18.6835
151.2	11.2081		155.44	18.7086
151.1	11.2197		155.34	18.7337
151	11.2313		155.24	18.7589
150.9	11.2429		155.14	18.7841
150.8	11.2545		155.04	18.8093
150.7	11.2662		154.94	18.8345
150.6	11.2779		154.84	18.8598
150.5	11.2895		154.74	18.8851
150.4	11.3012		154.64	18.9105
150.3	11.3129		154.54	18.9359
150.2	11.3246		154.44	18.9613
150.1	11.3363		154.34	18.9867
150	11.3481		154.24	19.0122
149.9	11.3598		154.14	19.0377
149.8	11.3716		154.04	19.0633
149.7	11.3833		153.94	19.0889
149.6	11.3951		153.84	19.1145
149.5	11.4069		153.74	19.1402
149.4	11.4187		153.64	19.1659
149.3	11.4305		153.54	19.1916
149.2	11.4424		153.44	19.2173
149.1	11.4542		153.34	19.2431
149	11.4661		153.24	19.269
148.9	11.4779		153.14	19.2948
148.8	11.4898		153.04	19.3207
148.7	11.5017		152.94	19.3467
148.6	11.5136		152.84	19.3726
148.5	11.5255		152.74	19.3987
148.4	11.5374		152.64	19.4247
148.3	11.5494		152.54	19.4508
148.2	11.5613		152.44	19.4769
148.1	11.5733		152.34	19.503
148	11.5853		152.24	19.5292
147.9	11.5973		152.14	19.5554
147.8	11.6093		152.04	19.5817
147.7	11.6213		151.94	19.608
147.6	11.6333		151.84	19.6343
147.5	11.6454		151.74	19.6606
147.4	11.6574		151.64	19.687
147.3	11.6695		151.54	19.7134
147.2	11.6815		151.44	19.7399
147.1	11.6936		151.34	19.7664
147	11.7057		151.24	19.7929
146.9	11.7179		151.14	19.8195
146.8	11.73		151.04	19.8461
146.7	11.7421		150.94	19.8728
146.6	11.7543		150.84	19.8994
146.5	11.7664		150.74	19.9261
146.4	11.7786		150.64	19.9529
146.3	11.7908		150.54	19.9797
146.2	11.803		150.44	20.0065
146.1	11.8152		150.34	20.0333
146	11.8275		150.24	20.0602
145.9	11.8397		150.14	20.0872
145.8	11.8519		150.04	20.1141
145.7	11.8642		149.94	20.1411
145.6	11.8765		149.84	20.1682
145.5	11.8888		149.74	20.1952
145.4	11.9011		149.64	20.2223
145.3	11.9134		149.54	20.2495
145.2	11.9257		149.44	20.2767
145.1	11.9381		149.34	20.3039
145	11.9504		149.24	20.3311
144.9	11.9628		149.14	20.3584
144.8	11.9752		149.04	20.3858
144.7	11.9876		148.94	20.4131
144.6	12		148.84	20.4405
144.5	12.0124		148.74	20.468
144.4	12.0248		148.64	20.4954
144.3	12.0373		148.54	20.523
144.2	12.0497		148.44	20.5505
144.1	12.0622		148.34	20.5781
144	12.0747		148.24	20.6057
143.9	12.0872		148.14	20.6334
143.8	12.0997		148.04	20.6611
143.7	12.1122		147.94	20.6888
143.6	12.1248		147.84	20.7166
143.5	12.1373		147.74	20.7444
143.4	12.1499		147.64	20.7722
143.3	12.1624		147.54	20.8001
143.2	12.175		147.44	20.828
143.1	12.1876		147.34	20.856
143	12.2002		147.24	20.884
142.9	12.2129		147.14	20.912
142.8	12.2255		147.04	20.9401
142.7	12.2382		146.94	20.9682
142.6	12.2508		146.84	20.9964
142.5	12.2635		146.74	21.0245
142.4	12.2762		146.64	21.0528
142.3	12.2889		146.54	21.081
142.2	12.3016		146.44	21.1093
142.1	12.3144		146.34	21.1377
142	12.3271		146.24	21.166
141.9	12.3399		146.14	21.1944
141.8	12.3526		146.04	21.2229
141.7	12.3654		145.94	21.2514
141.6	12.3782		145.84	21.2799
141.5	12.391		145.74	21.3085
141.4	12.4038		145.64	21.3371
141.3	12.4167		145.54	21.3657
141.2	12.4295		145.44	21.3944
141.1	12.4424		145.34	21.4231
141	12.4553		145.24	21.4519
140.9	12.4682		145.14	21.4807
140.8	12.4811		145.04	21.5095
140.7	12.494		144.94	21.5384
140.6	12.5069		144.84	21.5673
140.5	12.5199		144.74	21.5962
140.4	12.5328		144.64	21.6252
140.3	12.5458		144.54	21.6543
140.2	12.5588		144.44	21.6833
140.1	12.5718		144.34	21.7124
140	12.5848		144.24	21.7416
139.9	12.5978		144.14	21.7708
139.8	12.6108		144.04	21.8
139.7	12.6239		143.94	21.8293
139.6	12.637		143.84	21.8586
139.5	12.65		143.74	21.8879
139.4	12.6631		143.64	21.9173
139.3	12.6762		143.54	21.9467
139.2	12.6893		143.44	21.9762
139.1	12.7025		143.34	22.0057
139	12.7156		143.24	22.0352
138.9	12.7288		143.14	22.0648
138.8	12.742		143.04	22.0944
138.7	12.7551		142.94	22.1241
138.6	12.7684		142.84	22.1537
138.5	12.7816		142.74	22.1835
138.4	12.7948		142.64	22.2133
138.3	12.808		142.54	22.2431
138.2	12.8213		142.44	22.2729
138.1	12.8346		142.34	22.3028
138	12.8478		142.24	22.3328
137.9	12.8611		142.14	22.3628
137.8	12.8744		142.04	22.3928
137.7	12.8878		141.94	22.4228
137.6	12.9011		141.84	22.4529
137.5	12.9145		141.74	22.4831
137.4	12.9278		141.64	22.5133
137.3	12.9412		141.54	22.5435
137.2	12.9546		141.44	22.5737
137.1	12.968		141.34	22.604
137	12.9814		141.24	22.6344
136.9	12.9949		141.14	22.6648
136.8	13.0083		141.04	22.6952
136.7	13.0218		140.94	22.7257
136.6	13.0353		140.84	22.7562
136.5	13.0487		140.74	22.7867
136.4	13.0622		140.64	22.8173
136.3	13.0758		140.54	22.8479
136.2	13.0893		140.44	22.8786
136.1	13.1028		140.34	22.9093
136	13.1164		140.24	22.9401
135.9	13.13		140.14	22.9708
135.8	13.1436		140.04	23.0017
135.7	13.1572		139.94	23.0326
135.6	13.1708		139.84	23.0635
135.5	13.1844		139.74	23.0944
135.4	13.1981		139.64	23.1254
135.3	13.2117		139.54	23.1565
135.2	13.2254		139.44	23.1876
135.1	13.2391		139.34	23.2187
135	13.2528		139.24	23.2499
134.9	13.2665		139.14	23.2811
134.8	13.2802		139.04	23.3123
134.7	13.294		138.94	23.3436
134.6	13.3077		138.84	23.3749
134.5	13.3215		138.74	23.4063
134.4	13.3353		138.64	23.4377
134.3	13.3491		138.54	23.4692
134.2	13.3629		138.44	23.5007
134.1	13.3767		138.34	23.5323
134	13.3906		138.24	23.5638
133.9	13.4044		138.14	23.5955
133.8	13.4183		138.04	23.6271
133.7	13.4322		137.94	23.6589
133.6	13.4461		137.84	23.6906
133.5	13.46		137.74	23.7224
133.4	13.474		137.64	23.7543
133.3	13.4879		137.54	23.7861
133.2	13.5019		137.44	23.8181
133.1	13.5158		137.34	23.8501
133	13.5298		137.24	23.8821
132.9	13.5438		137.14	23.9141
132.8	13.5578		137.04	23.9462
132.7	13.5719		136.94	23.9784
132.6	13.5859		136.84	24.0106
132.5	13.6		136.74	24.0428
132.4	13.6141		136.64	24.0751
132.3	13.6281		136.54	24.1074
132.2	13.6422		136.44	24.1397
132.1	13.6564		136.34	24.1721
132	13.6705		136.24	24.2046
131.9	13.6846		136.14	24.2371
131.8	13.6988		136.04	24.2696
131.7	13.713		135.94	24.3022
131.6	13.7272		135.84	24.3348
131.5	13.7414		135.74	24.3675
131.4	13.7556		135.64	24.4002
131.3	13.7698		135.54	24.4329
131.2	13.7841		135.44	24.4657
131.1	13.7984		135.34	24.4986
131	13.8126		135.24	24.5315
130.9	13.8269		135.14	24.5644
130.8	13.8412		135.04	24.5974
130.7	13.8556		134.94	24.6304
130.6	13.8699		134.84	24.6635
130.5	13.8843		134.74	24.6966
130.4	13.8986		134.64	24.7297
130.3	13.913		134.54	24.7629
130.2	13.9274		134.44	24.7961
130.1	13.9418		134.34	24.8294
130	13.9563		134.24	24.8628
129.9	13.9707		134.14	24.8961
129.8	13.9852		134.04	24.9296
129.7	13.9996		133.94	24.963
129.6	14.0141		133.84	24.9965
129.5	14.0286		133.74	25.0301
129.4	14.0431		133.64	25.0637
129.3	14.0577		133.54	25.0973
129.2	14.0722		133.44	25.131
129.1	14.0868		133.34	25.1648
129	14.1014		133.24	25.1985
128.9	14.116		133.14	25.2324
128.8	14.1306		133.04	25.2662
128.7	14.1452		132.94	25.3001
128.6	14.1598		132.84	25.3341
128.5	14.1745		132.74	25.3681
128.4	14.1892		132.64	25.4022
128.3	14.2039		132.54	25.4363
128.2	14.2186		132.44	25.4704
128.1	14.2333		132.34	25.5046
128	14.248		132.24	25.5388
127.9	14.2627		132.14	25.5731
127.8	14.2775		132.04	25.6074
127.7	14.2923		131.94	25.6418
127.6	14.3071		131.84	25.6762
127.5	14.3219		131.74	25.7107
127.4	14.3367		131.64	25.7452
127.3	14.3515		131.54	25.7798
127.2	14.3664		131.44	25.8144
127.1	14.3813		131.34	25.849
127	14.3961		131.24	25.8837
126.9	14.411		131.14	25.9185
126.8	14.426		131.04	25.9533
126.7	14.4409		130.94	25.9881
126.6	14.4558		130.84	26.023
126.5	14.4708		130.74	26.0579
126.4	14.4858		130.64	26.0929
126.3	14.5008		130.54	26.1279
126.2	14.5158		130.44	26.163
126.1	14.5308		130.34	26.1981
126	14.5458		130.24	26.2333
125.9	14.5609		130.14	26.2685
125.8	14.576		130.04	26.3038
125.7	14.591		129.94	26.3391
125.6	14.6061		129.84	26.3744
125.5	14.6213		129.74	26.4098
125.4	14.6364		129.64	26.4453
125.3	14.6515		129.54	26.4808
125.2	14.6667		129.44	26.5163
125.1	14.6819		129.34	26.5519
125	14.6971		129.24	26.5876
124.9	14.7123		129.14	26.6233
124.8	14.7275		129.04	26.659
124.7	14.7428		128.94	26.6948
124.6	14.758		128.84	26.7306
124.5	14.7733		128.74	26.7665
124.4	14.7886		128.64	26.8024
124.3	14.8039		128.54	26.8384
124.2	14.8192		128.44	26.8744
124.1	14.8345		128.34	26.9105
124	14.8499		128.24	26.9466
123.9	14.8653		128.14	26.9828
123.8	14.8806		128.04	27.019
123.7	14.896		127.94	27.0553
123.6	14.9115		127.84	27.0916
123.5	14.9269		127.74	27.128
123.4	14.9423		127.64	27.1644
123.3	14.9578		127.54	27.2008
123.2	14.9733		127.44	27.2374
123.1	14.9888		127.34	27.2739
123	15.0043		127.24	27.3105
122.9	15.0198		127.14	27.3472
122.8	15.0354		127.04	27.3839
122.7	15.0509		126.94	27.4207
122.6	15.0665		126.84	27.4575
122.5	15.0821		126.74	27.4943
122.4	15.0977		126.64	27.5312
122.3	15.1133		126.54	27.5682
122.2	15.129		126.44	27.6052
122.1	15.1446		126.34	27.6423
122	15.1603		126.24	27.6794
121.9	15.176		126.14	27.7165
121.8	15.1917		126.04	27.7537
121.7	15.2074		125.94	27.791
121.6	15.2232		125.84	27.8283
121.5	15.2389		125.74	27.8656
121.4	15.2547		125.64	27.903
121.3	15.2705		125.54	27.9405
121.2	15.2863		125.44	27.978
121.1	15.3021		125.34	28.0156
121	15.3179		125.24	28.0532
120.9	15.3338		125.14	28.0908
120.8	15.3497		125.04	28.1285
120.7	15.3655		124.94	28.1663
120.6	15.3815		124.84	28.2041
120.5	15.3974		124.74	28.242
120.4	15.4133		124.64	28.2799
120.3	15.4293		124.54	28.3178
120.2	15.4452		124.44	28.3558
120.1	15.4612		124.34	28.3939
120	15.4772		124.24	28.432
119.9	15.4932		124.14	28.4702
119.8	15.5093		124.04	28.5084
119.7	15.5253		123.94	28.5467
119.6	15.5414		123.84	28.585
119.5	15.5575		123.74	28.6234
119.4	15.5736		123.64	28.6618
119.3	15.5897		123.54	28.7003
119.2	15.6058		123.44	28.7388
119.1	15.622		123.34	28.7774
119	15.6381		123.24	28.816
118.9	15.6543		123.14	28.8547
118.8	15.6705		123.04	28.8934
118.7	15.6867		122.94	28.9322
118.6	15.703		122.84	28.971
118.5	15.7192		122.74	29.0099
118.4	15.7355		122.64	29.0489
118.3	15.7518		122.54	29.0878
118.2	15.7681		122.44	29.1269
118.1	15.7844		122.34	29.166
118	15.8007		122.24	29.2051
117.9	15.8171		122.14	29.2443
117.8	15.8335		122.04	29.2836
117.7	15.8499		121.94	29.3229
117.6	15.8663		121.84	29.3623
117.5	15.8827		121.74	29.4017
117.4	15.8991		121.64	29.4412
117.3	15.9156		121.54	29.4807
117.2	15.932		121.44	29.5202
117.1	15.9485		121.34	29.5599
117	15.965		121.24	29.5996
116.9	15.9816		121.14	29.6393
116.8	15.9981		121.04	29.6791
116.7	16.0147		120.94	29.7189
116.6	16.0312		120.84	29.7588
116.5	16.0478		120.74	29.7988
116.4	16.0644		120.64	29.8388
116.3	16.0811		120.54	29.8788
116.2	16.0977		120.44	29.9189
116.1	16.1144		120.34	29.9591
116	16.131		120.24	29.9993
115.9	16.1477		120.14	30.0396
115.8	16.1644		120.04	30.0799
115.7	16.1812		119.94	30.1203
115.6	16.1979		119.84	30.1607
115.5	16.2147		119.74	30.2012
115.4	16.2315		119.64	30.2417
115.3	16.2483		119.54	30.2823
115.2	16.2651		119.44	30.323
115.1	16.2819		119.34	30.3637
115	16.2988		119.24	30.4044
114.9	16.3156		119.14	30.4452
114.8	16.3325		119.04	30.4861
114.7	16.3494		118.94	30.527
114.6	16.3663		118.84	30.568
114.5	16.3833		118.74	30.609
114.4	16.4002		118.64	30.6501
114.3	16.4172		118.54	30.6913
114.2	16.4342		118.44	30.7325
114.1	16.4512		118.34	30.7737
114	16.4682		118.24	30.815
113.9	16.4853		118.14	30.8564
113.8	16.5023		118.04	30.8978
113.7	16.5194		117.94	30.9393
113.6	16.5365		117.84	30.9808
113.5	16.5536		117.74	31.0224
113.4	16.5708		117.64	31.0641
113.3	16.5879		117.54	31.1058
113.2	16.6051		117.44	31.1475
113.1	16.6223		117.34	31.1893
113	16.6395		117.24	31.2312
112.9	16.6567		117.14	31.2731
112.8	16.6739		117.04	31.3151
112.7	16.6912		116.94	31.3571
112.6	16.7085		116.84	31.3992
112.5	16.7257		116.74	31.4414
112.4	16.7431		116.64	31.4836
112.3	16.7604		116.54	31.5258
112.2	16.7777		116.44	31.5682
112.1	16.7951		116.34	31.6105
112	16.8125		116.24	31.653
111.9	16.8299		116.14	31.6954
111.8	16.8473		116.04	31.738
111.7	16.8647		115.94	31.7806
111.6	16.8822		115.84	31.8233
111.5	16.8997		115.74	31.866
111.4	16.9171		115.64	31.9088
111.3	16.9347		115.54	31.9516
111.2	16.9522		115.44	31.9945
111.1	16.9697		115.34	32.0374
111	16.9873		115.24	32.0804
110.9	17.0049		115.14	32.1235
110.8	17.0225		115.04	32.1666
110.7	17.0401		114.94	32.2098
110.6	17.0577		114.84	32.253
110.5	17.0754		114.74	32.2963
110.4	17.093		114.64	32.3397
110.3	17.1107		114.54	32.3831
110.2	17.1284		114.44	32.4266
110.1	17.1462		114.34	32.4701
110	17.1639		114.24	32.5137
109.9	17.1817		114.14	32.5573
109.8	17.1995		114.04	32.601
109.7	17.2173		113.94	32.6448
109.6	17.2351		113.84	32.6886
109.5	17.2529		113.74	32.7325
109.4	17.2708		113.64	32.7764
109.3	17.2886		113.54	32.8204
109.2	17.3065		113.44	32.8645
109.1	17.3245		113.34	32.9086
109	17.3424		113.24	32.9528
108.9	17.3603		113.14	32.997
108.8	17.3783		113.04	33.0413
108.7	17.3963		112.94	33.0856
108.6	17.4143		112.84	33.1301
108.5	17.4323		112.74	33.1745
108.4	17.4504		112.64	33.2191
108.3	17.4684		112.54	33.2636
108.2	17.4865		112.44	33.3083
108.1	17.5046		112.34	33.353
108	17.5227		112.24	33.3978
107.9	17.5408		112.14	33.4426
107.8	17.559		112.04	33.4875
107.7	17.5772		111.94	33.5325
107.6	17.5954		111.84	33.5775
107.5	17.6136		111.74	33.6225
107.4	17.6318		111.64	33.6677
107.3	17.65		111.54	33.7129
107.2	17.6683		111.44	33.7581
107.1	17.6866		111.34	33.8034
107	17.7049		111.24	33.8488
106.9	17.7232		111.14	33.8943
106.8	17.7416		111.04	33.9397
106.7	17.7599		110.94	33.9853
106.6	17.7783		110.84	34.0309
106.5	17.7967		110.74	34.0766
106.4	17.8151		110.64	34.1224
106.3	17.8336		110.54	34.1682
106.2	17.852		110.44	34.214
106.1	17.8705		110.34	34.2599
106	17.889		110.24	34.3059
105.9	17.9075		110.14	34.352
105.8	17.926		110.04	34.3981
105.7	17.9446		109.94	34.4443
105.6	17.9632		109.84	34.4905
105.5	17.9818		109.74	34.5368
105.4	18.0004		109.64	34.5832
105.3	18.019		109.54	34.6296
105.2	18.0376		109.44	34.6761
105.1	18.0563		109.34	34.7226
105	18.075		109.24	34.7692
104.9	18.0937		109.14	34.8159
104.8	18.1124		109.04	34.8626
104.7	18.1312		108.94	34.9094
104.6	18.1499		108.84	34.9563
104.5	18.1687		108.74	35.0032
104.4	18.1875		108.64	35.0502
104.3	18.2063		108.54	35.0973
104.2	18.2252		108.44	35.1444
104.1	18.2441		108.34	35.1915
104	18.2629		108.24	35.2388
103.9	18.2818		108.14	35.2861
103.8	18.3008		108.04	35.3335
103.7	18.3197		107.94	35.3809
103.6	18.3387		107.84	35.4284
103.5	18.3576		107.74	35.4759
103.4	18.3766		107.64	35.5236
103.3	18.3957		107.54	35.5712
103.2	18.4147		107.44	35.619
103.1	18.4337		107.34	35.6668
103	18.4528		107.24	35.7147
102.9	18.4719		107.14	35.7626
102.8	18.491		107.04	35.8106
102.7	18.5102		106.94	35.8587
102.6	18.5293		106.84	35.9068
102.5	18.5485		106.74	35.955
102.4	18.5677		106.64	36.0033
102.3	18.5869		106.54	36.0516
102.2	18.6062		106.44	36.1
102.1	18.6254		106.34	36.1485
102	18.6447		106.24	36.197
101.9	18.664		106.14	36.2456
101.8	18.6833		106.04	36.2942
101.7	18.7026		105.94	36.343
101.6	18.722		105.84	36.3917
101.5	18.7414		105.74	36.4406
101.4	18.7608		105.64	36.4895
101.3	18.7802		105.54	36.5385
101.2	18.7996		105.44	36.5875
101.1	18.8191		105.34	36.6367
101	18.8386		105.24	36.6858
100.9	18.8581		105.14	36.7351
100.8	18.8776		105.04	36.7844
100.7	18.8971		104.94	36.8338
100.6	18.9167		104.84	36.8832
100.5	18.9362		104.74	36.9327
100.4	18.9558		104.64	36.9823
100.3	18.9755		104.54	37.0319
100.2	18.9951		104.44	37.0817
100.1	19.0148		104.34	37.1314
100	19.0344		104.24	37.1813
99.9	19.0541		104.14	37.2312
99.8	19.0739		104.04	37.2812
99.7	19.0936		103.94	37.3312
99.6	19.1134		103.84	37.3813
99.5	19.1331		103.74	37.4315
99.4	19.1529		103.64	37.4817
99.3	19.1728		103.54	37.5321
99.2	19.1926		103.44	37.5824
99.1	19.2125		103.34	37.6329
99	19.2324		103.24	37.6834
98.9	19.2523		103.14	37.734
98.8	19.2722		103.04	37.7846
98.7	19.2921		102.94	37.8354
98.6	19.3121		102.84	37.8861
98.5	19.3321		102.74	37.937
98.4	19.3521		102.64	37.9879
98.3	19.3721		102.54	38.0389
98.2	19.3922		102.44	38.09
98.1	19.4122		102.34	38.1411
98	19.4323		102.24	38.1923
97.9	19.4524		102.14	38.2436
97.8	19.4726		102.04	38.2949
97.7	19.4927		101.94	38.3463
97.6	19.5129		101.84	38.3978
97.5	19.5331		101.74	38.4493
97.4	19.5533		101.64	38.5009
97.3	19.5735		101.54	38.5526
97.2	19.5938		101.44	38.6044
97.1	19.6141		101.34	38.6562
97	19.6344		101.24	38.7081
96.9	19.6547		101.14	38.7601
96.8	19.675		101.04	38.8121
96.7	19.6954		100.94	38.8642
96.6	19.7158		100.84	38.9163
96.5	19.7362		100.74	38.9686
96.4	19.7566		100.64	39.0209
96.3	19.7771		100.54	39.0733
96.2	19.7975		100.44	39.1257
96.1	19.818		100.34	39.1782
96	19.8385		100.24	39.2308
95.9	19.8591		100.14	39.2835
95.8	19.8796		100.04	39.3362
95.7	19.9002		99.94	39.389
95.6	19.9208		99.84	39.4419
95.5	19.9414		99.74	39.4949
95.4	19.962		99.64	39.5479
95.3	19.9827		99.54	39.601
95.2	20.0034		99.44	39.6541
95.1	20.0241		99.34	39.7073
95	20.0448		99.24	39.7606
94.9	20.0655		99.14	39.814
94.8	20.0863		99.04	39.8675
94.7	20.1071		98.94	39.921
94.6	20.1279		98.84	39.9746
94.5	20.1487		98.74	40.0282
94.4	20.1696		98.64	40.082
94.3	20.1905		98.54	40.1358
94.2	20.2114		98.44	40.1896
94.1	20.2323		98.34	40.2436
94	20.2532		98.24	40.2976
93.9	20.2742		98.14	40.3517
93.8	20.2952		98.04	40.4059
93.7	20.3162		97.94	40.4601
93.6	20.3372		97.84	40.5144
93.5	20.3582		97.74	40.5688
93.4	20.3793		97.64	40.6233
93.3	20.4004		97.54	40.6778
93.2	20.4215		97.44	40.7324
93.1	20.4427		97.34	40.7871
93	20.4638		97.24	40.8418
92.9	20.485		97.14	40.8966
92.8	20.5062		97.04	40.9515
92.7	20.5274		96.94	41.0065
92.6	20.5487		96.84	41.0616
92.5	20.5699		96.74	41.1167
92.4	20.5912		96.64	41.1719
92.3	20.6125		96.54	41.2271
92.2	20.6339		96.44	41.2825
92.1	20.6552		96.34	41.3379
92	20.6766		96.24	41.3934
91.9	20.698		96.14	41.4489
91.8	20.7194		96.04	41.5046
91.7	20.7409		95.94	41.5603
91.6	20.7623		95.84	41.6161
91.5	20.7838		95.74	41.6719
91.4	20.8053		95.64	41.7279
91.3	20.8268		95.54	41.7839
91.2	20.8484		95.44	41.84
91.1	20.87		95.34	41.8962
91	20.8916		95.24	41.9524
90.9	20.9132		95.14	42.0087
90.8	20.9348		95.04	42.0651
90.7	20.9565		94.94	42.1216
90.6	20.9782		94.84	42.1781
90.5	20.9999		94.74	42.2347
90.4	21.0216		94.64	42.2914
90.3	21.0434		94.54	42.3482
90.2	21.0652		94.44	42.405
90.1	21.087		94.34	42.462
90	21.1088		94.24	42.519
89.9	21.1307		94.14	42.576
89.8	21.1525		94.04	42.6332
89.7	21.1744		93.94	42.6904
89.6	21.1963		93.84	42.7477
89.5	21.2183		93.74	42.8051
89.4	21.2402		93.64	42.8626
89.3	21.2622		93.54	42.9201
89.2	21.2842		93.44	42.9777
89.1	21.3062		93.34	43.0354
89	21.3283		93.24	43.0932
88.9	21.3504		93.14	43.151
88.8	21.3725		93.04	43.2089
88.7	21.3946		92.94	43.2669
88.6	21.4167		92.84	43.325
88.5	21.4389		92.74	43.3832
88.4	21.4611		92.64	43.4414
88.3	21.4833		92.54	43.4997
88.2	21.5055		92.44	43.5581
88.1	21.5278		92.34	43.6166
88	21.5501		92.24	43.6751
87.9	21.5724		92.14	43.7338
87.8	21.5947		92.04	43.7925
87.7	21.617		91.94	43.8512
87.6	21.6394		91.84	43.9101
87.5	21.6618		91.74	43.9691
87.4	21.6842		91.64	44.0281
87.3	21.7067		91.54	44.0872
87.2	21.7291		91.44	44.1464
87.1	21.7516		91.34	44.2056
87	21.7741		91.24	44.265
86.9	21.7967		91.14	44.3244
86.8	21.8192		91.04	44.3839
86.7	21.8418		90.94	44.4435
86.6	21.8644		90.84	44.5031
86.5	21.887		90.74	44.5628
86.4	21.9097		90.64	44.6227
86.3	21.9324		90.54	44.6826
86.2	21.9551		90.44	44.7425
86.1	21.9778		90.34	44.8026
86	22.0005		90.24	44.8627
85.9	22.0233		90.14	44.923
85.8	22.0461		90.04	44.9833
85.7	22.0689		89.94	45.0437
85.6	22.0917		89.84	45.1041
85.5	22.1146		89.74	45.1647
85.4	22.1375		89.64	45.2253
85.3	22.1604		89.54	45.286
85.2	22.1833		89.44	45.3468
85.1	22.2063		89.34	45.4077
85	22.2293		89.24	45.4686
84.9	22.2523		89.14	45.5296
84.8	22.2753		89.04	45.5908
84.7	22.2984		88.94	45.652
84.6	22.3214		88.84	45.7132
84.5	22.3446		88.74	45.7746
84.4	22.3677		88.64	45.8361
84.3	22.3908		88.54	45.8976
84.2	22.414		88.44	45.9592
84.1	22.4372		88.34	46.0209
84	22.4604		88.24	46.0827
83.9	22.4837		88.14	46.1445
83.8	22.5069		88.04	46.2065
83.7	22.5302		87.94	46.2685
83.6	22.5535		87.84	46.3306
83.5	22.5769		87.74	46.3928
83.4	22.6002		87.64	46.4551
83.3	22.6236		87.54	46.5174
83.2	22.6471		87.44	46.5799
83.1	22.6705		87.34	46.6424
83	22.694		87.24	46.705
82.9	22.7174		87.14	46.7677
82.8	22.741		87.04	46.8305
82.7	22.7645		86.94	46.8933
82.6	22.788		86.84	46.9563
82.5	22.8116		86.74	47.0193
82.4	22.8352		86.64	47.0824
82.3	22.8589		86.54	47.1456
82.2	22.8825		86.44	47.2089
82.1	22.9062		86.34	47.2723
82	22.9299		86.24	47.3357
81.9	22.9537		86.14	47.3993
81.8	22.9774		86.04	47.4629
81.7	23.0012		85.94	47.5266
81.6	23.025		85.84	47.5904
81.5	23.0488		85.74	47.6543
81.4	23.0727		85.64	47.7183
81.3	23.0966		85.54	47.7823
81.2	23.1205		85.44	47.8465
81.1	23.1444		85.34	47.9107
81	23.1683		85.24	47.975
80.9	23.1923		85.14	48.0394
80.8	23.2163		85.04	48.1039
80.7	23.2403		84.94	48.1685
80.6	23.2644		84.84	48.2331
80.5	23.2885		84.74	48.2979
80.4	23.3126		84.64	48.3627
80.3	23.3367		84.54	48.4276
80.2	23.3609		84.44	48.4926
80.1	23.385		84.34	48.5577
80	23.4092		84.24	48.6229
79.9	23.4335		84.14	48.6882
79.8	23.4577		84.04	48.7535
79.7	23.482		83.94	48.819
79.6	23.5063		83.84	48.8845
79.5	23.5306		83.74	48.9501
79.4	23.555		83.64	49.0158
79.3	23.5794		83.54	49.0816
79.2	23.6038		83.44	49.1475
79.1	23.6282		83.34	49.2135
79	23.6526		83.24	49.2795
78.9	23.6771		83.14	49.3457
78.8	23.7016		83.04	49.4119
78.7	23.7262		82.94	49.4783
78.6	23.7507		82.84	49.5447
78.5	23.7753		82.74	49.6112
78.4	23.7999		82.64	49.6778
78.3	23.8245		82.54	49.7445
78.2	23.8492		82.44	49.8112
78.1	23.8739		82.34	49.8781
78	23.8986		82.24	49.9451
77.9	23.9233		82.14	50.0121
77.8	23.9481		82.04	50.0792
77.7	23.9729		81.94	50.1465
77.6	23.9977		81.84	50.2138
77.5	24.0225		81.74	50.2812
77.4	24.0474		81.64	50.3487
77.3	24.0722		81.54	50.4163
77.2	24.0972		81.44	50.4839
77.1	24.1221		81.34	50.5517
77	24.1471		81.24	50.6196
76.9	24.1721		81.14	50.6875
76.8	24.1971		81.04	50.7555
76.7	24.2221		80.94	50.8237
76.6	24.2472		80.84	50.8919
76.5	24.2723		80.74	50.9602
76.4	24.2974		80.64	51.0286
76.3	24.3225		80.54	51.0971
76.2	24.3477		80.44	51.1657
76.1	24.3729		80.34	51.2344
76	24.3981		80.24	51.3032
75.9	24.4234		80.14	51.372
75.8	24.4487		80.04	51.441
75.7	24.474		79.94	51.51
75.6	24.4993		79.84	51.5792
75.5	24.5247		79.74	51.6484
75.4	24.55		79.64	51.7178
75.3	24.5754		79.54	51.7872
75.2	24.6009		79.44	51.8567
75.1	24.6263		79.34	51.9263
75	24.6518		79.24	51.996
74.9	24.6773		79.14	52.0658
74.8	24.7029		79.04	52.1357
74.7	24.7284		78.94	52.2057
74.6	24.754		78.84	52.2758
74.5	24.7797		78.74	52.3459
74.4	24.8053		78.64	52.4162
74.3	24.831		78.54	52.4866
74.2	24.8567		78.44	52.557
74.1	24.8824		78.34	52.6276
74	24.9081		78.24	52.6982
73.9	24.9339		78.14	52.7689
73.8	24.9597		78.04	52.8398
73.7	24.9856		77.94	52.9107
73.6	25.0114		77.84	52.9817
73.5	25.0373		77.74	53.0529
73.4	25.0632		77.64	53.1241
73.3	25.0892		77.54	53.1954
73.2	25.1151		77.44	53.2668
73.1	25.1411		77.34	53.3383
73	25.1671		77.24	53.4099
72.9	25.1932		77.14	53.4816
72.8	25.2193		77.04	53.5534
72.7	25.2454		76.94	53.6253
72.6	25.2715		76.84	53.6972
72.5	25.2976		76.74	53.7693
72.4	25.3238		76.64	53.8415
72.3	25.35		76.54	53.9138
72.2	25.3763		76.44	53.9861
72.1	25.4025		76.34	54.0586
72	25.4288		76.24	54.1312
71.9	25.4551		76.14	54.2038
71.8	25.4815		76.04	54.2766
71.7	25.5079		75.94	54.3495
71.6	25.5343		75.84	54.4224
71.5	25.5607		75.74	54.4955
71.4	25.5871		75.64	54.5686
71.3	25.6136		75.54	54.6419
71.2	25.6401		75.44	54.7152
71.1	25.6667		75.34	54.7887
71	25.6932		75.24	54.8622
70.9	25.7198		75.14	54.9359
70.8	25.7464		75.04	55.0096
70.7	25.7731		74.94	55.0834
70.6	25.7997		74.84	55.1574
70.5	25.8265		74.74	55.2314
70.4	25.8532		74.64	55.3056
70.3	25.8799		74.54	55.3798
70.2	25.9067		74.44	55.4541
70.1	25.9335		74.34	55.5286
70	25.9604		74.24	55.6031
69.9	25.9872		74.14	55.6778
69.8	26.0141		74.04	55.7525
69.7	26.0411		73.94	55.8273
69.6	26.068		73.84	55.9023
69.5	26.095		73.74	55.9773
69.4	26.122		73.64	56.0525
69.3	26.149		73.54	56.1277
69.2	26.1761		73.44	56.203
69.1	26.2032		73.34	56.2785
69	26.2303		73.24	56.354
68.9	26.2574		73.14	56.4297
68.8	26.2846		73.04	56.5054
68.7	26.3118		72.94	56.5813
68.6	26.3391		72.84	56.6572
68.5	26.3663		72.74	56.7333
68.4	26.3936		72.64	56.8094
68.3	26.4209		72.54	56.8857
68.2	26.4483		72.44	56.9621
68.1	26.4756		72.34	57.0385
68	26.503		72.24	57.1151
67.9	26.5305		72.14	57.1917
67.8	26.5579		72.04	57.2685
67.7	26.5854		71.94	57.3454
67.6	26.6129		71.84	57.4224
67.5	26.6405		71.74	57.4995
67.4	26.668		71.64	57.5766
67.3	26.6956		71.54	57.6539
67.2	26.7233		71.44	57.7313
67.1	26.7509		71.34	57.8088
67	26.7786		71.24	57.8864
66.9	26.8063		71.14	57.9641
66.8	26.8341		71.04	58.0419
66.7	26.8618		70.94	58.1198
66.6	26.8896		70.84	58.1979
66.5	26.9175		70.74	58.276
66.4	26.9453		70.64	58.3542
66.3	26.9732		70.54	58.4325
66.2	27.0011		70.44	58.511
66.1	27.0291		70.34	58.5895
66	27.057		70.24	58.6682
65.9	27.085		70.14	58.7469
65.8	27.1131		70.04	58.8258
65.7	27.1411		69.94	58.9047
65.6	27.1692		69.84	58.9838
65.5	27.1973		69.74	59.063
65.4	27.2255		69.64	59.1423
65.3	27.2537		69.54	59.2217
65.2	27.2819		69.44	59.3012
65.1	27.3101		69.34	59.3808
65	27.3384		69.24	59.4605
64.9	27.3667		69.14	59.5403
64.8	27.395		69.04	59.6202
64.7	27.4233		68.94	59.7002
64.6	27.4517		68.84	59.7804
64.5	27.4801		68.74	59.8606
64.4	27.5086		68.64	59.941
64.3	27.537		68.54	60.0214
64.2	27.5655		68.44	60.102
64.1	27.5941		68.34	60.1827
64	27.6226		68.24	60.2635
63.9	27.6512		68.14	60.3444
63.8	27.6798		68.04	60.4254
63.7	27.7085		67.94	60.5065
63.6	27.7372		67.84	60.5877
63.5	27.7659		67.74	60.669
63.4	27.7946		67.64	60.7505
63.3	27.8234		67.54	60.832
63.2	27.8522		67.44	60.9137
63.1	27.881		67.34	60.9954
63	27.9098		67.24	61.0773
62.9	27.9387		67.14	61.1593
62.8	27.9676		67.04	61.2414
62.7	27.9966		66.94	61.3236
62.6	28.0256		66.84	61.4059
62.5	28.0546		66.74	61.4884
62.4	28.0836		66.64	61.5709
62.3	28.1127		66.54	61.6535
62.2	28.1418		66.44	61.7363
62.1	28.1709		66.34	61.8192
62	28.2		66.24	61.9022
61.9	28.2292		66.14	61.9853
61.8	28.2584		66.04	62.0685
61.7	28.2877		65.94	62.1518
61.6	28.317		65.84	62.2352
61.5	28.3463		65.74	62.3187
61.4	28.3756		65.64	62.4024
61.3	28.405		65.54	62.4862
61.2	28.4344		65.44	62.57
61.1	28.4638		65.34	62.654
61	28.4933		65.24	62.7381
60.9	28.5228		65.14	62.8224
60.8	28.5523		65.04	62.9067
60.7	28.5818		64.94	62.9911
60.6	28.6114		64.84	63.0757
60.5	28.641		64.74	63.1603
60.4	28.6707		64.64	63.2451
60.3	28.7003		64.54	63.33
60.2	28.73		64.44	63.415
60.1	28.7598		64.34	63.5002
60	28.7895		64.24	63.5854
59.9	28.8193		64.14	63.6708
59.8	28.8491		64.04	63.7562
59.7	28.879		63.94	63.8418
59.6	28.9089		63.84	63.9275
59.5	28.9388		63.74	64.0133
59.4	28.9688		63.64	64.0992
59.3	28.9987		63.54	64.1853
59.2	29.0288		63.44	64.2714
59.1	29.0588		63.34	64.3577
59	29.0889		63.24	64.4441
58.9	29.119		63.14	64.5306
58.8	29.1491		63.04	64.6172
58.7	29.1793		62.94	64.704
58.6	29.2095		62.84	64.7908
58.5	29.2397		62.74	64.8778
58.4	29.27		62.64	64.9649
58.3	29.3003		62.54	65.0521
58.2	29.3306		62.44	65.1394
58.1	29.3609		62.34	65.2269
58	29.3913		62.24	65.3144
57.9	29.4217		62.14	65.4021
57.8	29.4522		62.04	65.4899
57.7	29.4827		61.94	65.5778
57.6	29.5132		61.84	65.6658
57.5	29.5437		61.74	65.754
57.4	29.5743		61.64	65.8422
57.3	29.6049		61.54	65.9306
57.2	29.6356		61.44	66.0191
57.1	29.6662		61.34	66.1077
57	29.6969		61.24	66.1965
56.9	29.7277		61.14	66.2853
56.8	29.7584		61.04	66.3743
56.7	29.7892		60.94	66.4634
56.6	29.8201		60.84	66.5526
56.5	29.8509		60.74	66.642
56.4	29.8818		60.64	66.7314
56.3	29.9127		60.54	66.821
56.2	29.9437		60.44	66.9107
56.1	29.9747		60.34	67.0005
56	30.0057		60.24	67.0905
55.9	30.0368		60.14	67.1805
55.8	30.0679		60.04	67.2707
55.7	30.099		59.94	67.361
55.6	30.1301		59.84	67.4514
55.5	30.1613		59.74	67.542
55.4	30.1925		59.64	67.6326
55.3	30.2238		59.54	67.7234
55.2	30.255		59.44	67.8143
55.1	30.2864		59.34	67.9054
55	30.3177		59.24	67.9965
54.9	30.3491		59.14	68.0878
54.8	30.3805		59.04	68.1792
54.7	30.4119		58.94	68.2707
54.6	30.4434		58.84	68.3623
54.5	30.4749		58.74	68.4541
54.4	30.5065		58.64	68.546
54.3	30.538		58.54	68.638
54.2	30.5696		58.44	68.7301
54.1	30.6013		58.34	68.8224
54	30.6329		58.24	68.9148
53.9	30.6646		58.14	69.0073
53.8	30.6964		58.04	69.0999
53.7	30.7282		57.94	69.1927
53.6	30.76		57.84	69.2856
53.5	30.7918		57.74	69.3786
53.4	30.8237		57.64	69.4717
53.3	30.8556		57.54	69.565
53.2	30.8875		57.44	69.6583
53.1	30.9195		57.34	69.7518
53	30.9515		57.24	69.8455
52.9	30.9835		57.14	69.9392
52.8	31.0156		57.04	70.0331
52.7	31.0477		56.94	70.1271
52.6	31.0798		56.84	70.2213
52.5	31.112		56.74	70.3155
52.4	31.1442		56.64	70.4099
52.3	31.1764		56.54	70.5044
52.2	31.2086		56.44	70.5991
52.1	31.2409		56.34	70.6938
52	31.2733		56.24	70.7887
51.9	31.3056		56.14	70.8837
51.8	31.338		56.04	70.9789
51.7	31.3705		55.94	71.0742
51.6	31.4029		55.84	71.1696
51.5	31.4354		55.74	71.2651
51.4	31.468		55.64	71.3608
51.3	31.5005		55.54	71.4566
51.2	31.5331		55.44	71.5525
51.1	31.5658		55.34	71.6485
51	31.5985		55.24	71.7447
50.9	31.6312		55.14	71.841
50.8	31.6639		55.04	71.9375
50.7	31.6967		54.94	72.034
50.6	31.7295		54.84	72.1307
50.5	31.7623		54.74	72.2275
50.4	31.7952		54.64	72.3245
[truncated: 929 more rows]

## Sheet: Fig. 3e sensitivity
Fig. 3e Description: Simulated angular sensitivity and total resonance-angle shift as a function of the number of BP layers. Simulation method: Transfer matrix method Structure: Au-film SPR structure modified with different numbers of BP layers X-axis: Number of BP layers, L Left Y-axis: Angular sensitivity (deg/RIU) Right Y-axis: Total resonance-angle shift Δθᵣ (deg) Notes: The angular sensitivi…
Number of BP layers, L	Angular sensitivity (deg/RIU)	Total resonance-angle shift Δθᵣ (deg)
0	145	2.89
1	152	3.04
2	160	3.22
3	173	3.43
4	185	3.72
5	204	4.08
6	227	4.58
7	260	5.2
8	267	5.26
9	218	3.15

## Sheet: Fig.5a Pb curves
Fig. 5a Description: Angle-scanned reflectance curves of SPR+BP-COOH for Pb²⁺ detection, together with the bare-Au SPR control curve. Sample: 13 nm SPR+BP-COOH Ion: Pb²⁺ Concentration range: 0, 10⁻¹⁹, 10⁻¹⁸, 10⁻¹⁷, 10⁻¹⁶ and 10⁻¹⁵ M X-axis: Incident angle (degree) Y-axis: Reflected intensity (a.u.) Notes: 0 M refers to pure water. The bare-Au SPR curve is included as the control under the same se…
SPR+BP-COOH								SPR
Incident angle (degree)	Reflected intensity (a.u.)							Incident angle (degree)	Reflected intensity (a.u.)
	Pb²⁺ 0 M	Pb²⁺ 10⁻¹⁹ M	Pb²⁺ 10⁻¹⁸ M	Pb²⁺ 10⁻¹⁷ M	Pb²⁺ 10⁻¹⁶ M	Pb²⁺ 10⁻¹⁵ M			Pb²⁺ 0 M	Pb²⁺ 10⁻¹⁹ M	Pb²⁺ 10⁻¹⁸ M	Pb²⁺ 10⁻¹⁷ M	Pb²⁺ 10⁻¹⁶ M	Pb²⁺ 10⁻¹⁵ M
65.98	13812	13782	13800	13696	13665	13589		65.98	14365	14383	14391	14394	14398	14393
66	13816	13796	13806	13711	13682	13604		66	14365	14379	14386	14390	14391	14400
66.019	13830	13811	13821	13728	13709	13625		66.019	14373	14395	14395	14393	14397	14400
66.04	13823	13805	13826	13728	13715	13639		66.04	14361	14383	14388	14382	14388	14395
66.059	13831	13811	13848	13746	13737	13649		66.059	14376	14391	14401	14396	14400	14409
66.08	13835	13821	13858	13755	13761	13658		66.08	14388	14406	14408	14401	14411	14412
66.099	13859	13839	13886	13782	13782	13705		66.099	14424	14437	14440	14432	14442	14442
66.12	13868	13845	13913	13799	13763	13726		66.12	14454	14462	14464	14462	14465	14469
66.139	13895	13868	13949	13849	13744	13725		66.139	14487	14501	14504	14497	14506	14515
66.16	13904	13881	13934	13852	13712	13692		66.16	14476	14499	14496	14498	14503	14509
66.18	13939	13914	13903	13835	13707	13676		66.18	14462	14483	14486	14492	14494	14495
66.199	13979	13961	13878	13802	13699	13657		66.199	14435	14454	14465	14460	14465	14472
66.22	14001	13981	13878	13791	13712	13662		66.22	14422	14447	14453	14447	14459	14461
66.239	13965	13954	13869	13781	13719	13653		66.239	14393	14415	14422	14425	14429	14431
66.26	13938	13927	13880	13778	13723	13669		66.26	14388	14408	14405	14410	14410	14421
66.279	13924	13905	13878	13783	13708	13667		66.279	14385	14402	14406	14402	14405	14410
66.3	13922	13900	13887	13798	13696	13661		66.3	14386	14408	14406	14411	14418	14421
66.319	13914	13886	13863	13784	13672	13638		66.319	14356	14380	14389	14387	14397	14396
66.339	13923	13907	13848	13775	13678	13628		66.339	14323	14349	14358	14359	14365	14365
66.36	13918	13902	13828	13751	13674	13617		66.36	14294	14307	14317	14313	14319	14323
66.379	13917	13904	13831	13740	13682	13627		66.379	14292	14305	14309	14313	14321	14318
66.4	13886	13873	13829	13740	13680	13622		66.4	14278	14293	14302	14302	14306	14302
66.419	13875	13861	13832	13746	13688	13633		66.419	14275	14292	14302	14302	14307	14304
66.44	13856	13837	13834	13742	13688	13625		66.44	14266	14282	14286	14286	14289	14295
66.459	13863	13843	13836	13752	13696	13630		66.459	14268	14283	14291	14288	14295	14299
66.48	13854	13836	13829	13744	13682	13632		66.48	14255	14271	14276	14284	14282	14288
66.5	13868	13843	13835	13753	13694	13637		66.5	14249	14274	14282	14286	14290	14292
66.519	13864	13835	13831	13751	13702	13643		66.519	14236	14264	14269	14274	14279	14279
66.54	13859	13838	13835	13758	13710	13650		66.54	14238	14264	14264	14268	14269	14269
66.559	13849	13833	13835	13749	13706	13649		66.559	14223	14246	14252	14251	14253	14258
66.58	13861	13837	13844	13756	13709	13653		66.58	14220	14240	14250	14248	14250	14254
66.599	13852	13831	13835	13752	13706	13647		66.599	14194	14221	14225	14231	14231	14231
66.62	13856	13844	13845	13763	13710	13654		66.62	14183	14214	14222	14221	14221	14229
66.639	13853	13841	13844	13758	13708	13647		66.639	14168	14200	14208	14206	14205	14215
66.66	13862	13849	13853	13768	13723	13661		66.66	14166	14190	14201	14203	14201	14206
66.68	13865	13848	13853	13767	13714	13663		66.68	14148	14177	14184	14185	14184	14191
66.699	13867	13850	13854	13775	13721	13668		66.699	14144	14171	14179	14176	14182	14183
66.72	13856	13839	13842	13766	13713	13656		66.72	14120	14147	14152	14151	14156	14157
66.739	13867	13852	13852	13781	13716	13664		66.739	14115	14144	14146	14141	14146	14152
66.76	13858	13848	13844	13765	13707	13660		66.76	14099	14125	14130	14122	14126	14140
66.779	13858	13850	13846	13769	13710	13659		66.779	14096	14122	14125	14127	14126	14137
66.8	13846	13840	13838	13766	13705	13653		66.8	14087	14108	14112	14112	14117	14121
66.819	13853	13848	13838	13769	13713	13661		66.819	14087	14111	14115	14121	14118	14121
66.839	13843	13839	13838	13766	13712	13662		66.839	14067	14097	14103	14096	14100	14107
66.86	13850	13846	13846	13773	13726	13670		66.86	14060	14084	14087	14087	14089	14088
66.879	13845	13837	13838	13764	13725	13671		66.879	14031	14061	14057	14061	14061	14066
66.9	13847	13838	13847	13778	13730	13687		66.9	14019	14046	14041	14045	14053	14060
66.919	13841	13837	13841	13777	13725	13678		66.919	13990	14015	14023	14027	14029	14035
66.94	13849	13846	13847	13784	13738	13689		66.94	13983	14002	14009	14011	14014	14021
66.959	13844	13847	13843	13779	13740	13689		66.959	13957	13975	13978	13981	13989	13988
66.98	13842	13844	13847	13785	13742	13689		66.98	13939	13955	13959	13970	13973	13969
67	13836	13838	13833	13778	13729	13684		67	13910	13931	13937	13942	13948	13942
67.019	13840	13847	13846	13782	13734	13688		67.019	13899	13922	13926	13924	13938	13932
67.04	13829	13831	13836	13769	13726	13690		67.04	13874	13895	13898	13897	13908	13904
67.059	13831	13837	13834	13773	13732	13689		67.059	13860	13876	13883	13883	13893	13891
67.08	13825	13827	13825	13762	13727	13680		67.08	13832	13851	13857	13855	13862	13865
67.099	13827	13828	13830	13773	13728	13686		67.099	13808	13832	13838	13839	13846	13851
67.12	13810	13820	13818	13765	13722	13683		67.12	13778	13807	13806	13815	13817	13822
67.139	13813	13827	13821	13768	13726	13687		67.139	13759	13785	13789	13800	13797	13797
67.16	13810	13814	13808	13761	13718	13677		67.16	13730	13753	13763	13770	13768	13768
67.18	13811	13815	13811	13773	13719	13684		67.18	13712	13734	13744	13748	13751	13748
67.199	13797	13801	13804	13755	13712	13678		67.199	13683	13707	13708	13712	13720	13715
67.22	13800	13809	13803	13756	13725	13685		67.22	13661	13684	13686	13693	13696	13695
67.239	13793	13803	13797	13754	13723	13685		67.239	13629	13656	13656	13656	13663	13666
67.26	13787	13794	13795	13762	13720	13689		67.26	13606	13630	13637	13638	13643	13644
67.279	13773	13776	13778	13745	13714	13683		67.279	13576	13594	13608	13608	13610	13609
67.3	13772	13776	13785	13751	13726	13693		67.3	13548	13578	13579	13587	13589	13590
67.319	13754	13769	13778	13737	13714	13678		67.319	13505	13537	13547	13543	13548	13555
67.339	13749	13766	13775	13742	13709	13680		67.339	13464	13504	13514	13510	13509	13517
67.36	13732	13754	13748	13725	13693	13666		67.36	13418	13462	13461	13468	13465	13470
67.379	13736	13753	13744	13725	13685	13663		67.379	13383	13422	13421	13426	13425	13434
67.4	13716	13736	13729	13705	13671	13649		67.4	13325	13359	13367	13368	13365	13375
67.419	13706	13725	13716	13695	13658	13637		67.419	13270	13309	13315	13311	13314	13324
67.44	13681	13705	13692	13674	13630	13616		67.44	13210	13243	13252	13254	13252	13262
67.459	13671	13694	13678	13664	13612	13600		67.459	13156	13193	13198	13203	13200	13210
67.48	13638	13672	13644	13637	13592	13576		67.48	13099	13126	13131	13139	13138	13144
67.5	13623	13657	13622	13624	13586	13569		67.5	13051	13080	13089	13081	13089	13095
67.519	13593	13623	13593	13597	13553	13549		67.519	12992	13022	13034	13034	13028	13038
67.54	13568	13596	13575	13582	13539	13530		67.54	12946	12974	12981	12987	12976	12986
67.559	13531	13570	13547	13557	13519	13512		67.559	12898	12924	12929	12930	12928	12936
67.58	13515	13562	13538	13541	13523	13507		67.58	12860	12892	12894	12889	12895	12899
67.599	13478	13523	13506	13519	13503	13484		67.599	12799	12830	12832	12837	12834	12845
67.62	13467	13506	13497	13513	13490	13479		67.62	12764	12785	12796	12797	12803	12805
67.639	13426	13474	13468	13490	13476	13469		67.639	12725	12741	12746	12753	12749	12749
67.66	13411	13464	13460	13484	13472	13464		67.66	12689	12700	12710	12715	12717	12713
67.68	13381	13433	13438	13466	13457	13446		67.68	12637	12656	12660	12663	12669	12664
67.699	13362	13414	13415	13456	13448	13445		67.699	12600	12615	12621	12619	12625	12622
67.72	13331	13389	13391	13437	13429	13427		67.72	12557	12568	12565	12576	12573	12576
67.739	13320	13379	13381	13429	13432	13420		67.739	12523	12538	12540	12544	12545	12544
67.76	13287	13347	13357	13401	13430	13414		67.76	12479	12497	12499	12503	12501	12499
67.779	13271	13326	13359	13395	13446	13421		67.779	12446	12461	12466	12470	12461	12469
67.8	13244	13302	13344	13391	13460	13436		67.8	12401	12422	12424	12435	12425	12428
67.819	13220	13289	13357	13410	13486	13452		67.819	12370	12385	12386	12400	12387	12394
67.839	13198	13263	13345	13406	13484	13460		67.839	12314	12336	12338	12341	12338	12339
67.86	13192	13259	13364	13422	13498	13478		67.86	12281	12291	12305	12303	12298	12296
67.879	13180	13248	13364	13423	13514	13486		67.879	12235	12249	12256	12252	12250	12252
67.9	13179	13253	13369	13439	13528	13513		67.9	12187	12201	12205	12210	12204	12207
67.919	13169	13250	13368	13444	13521	13520		67.919	12121	12145	12142	12150	12144	12147
67.94	13171	13253	13374	13451	13532	13525		67.94	12075	12087	12092	12104	12109	12101
67.959	13163	13239	13363	13443	13524	13519		67.959	12015	12028	12035	12035	12034	12032
67.98	13169	13246	13354	13449	13528	13528		67.98	11954	11977	11976	11978	11976	11974
68	13151	13232	13337	13437	13513	13522		68	11884	11908	11906	11906	11901	11902
68.019	13153	13232	13329	13442	13515	13530		68.019	11833	11848	11854	11853	11846	11850
68.04	13135	13216	13319	13427	13507	13525		68.04	11771	11789	11790	11784	11786	11785
68.059	13120	13212	13305	13422	13509	13518		68.059	11702	11728	11722	11723	11726	11728
68.08	13089	13184	13275	13402	13494	13513		68.08	11633	11651	11646	11649	11653	11657
68.099	13065	13174	13265	13397	13497	13520		68.099	11563	11579	11584	11584	11585	11587
68.12	13040	13150	13247	13376	13478	13506		68.12	11485	11499	11507	11503	11503	11502
68.139	13030	13140	13237	13373	13472	13505		68.139	11425	11435	11439	11436	11441	11433
68.16	13000	13114	13210	13351	13459	13489		68.16	11340	11357	11351	11355	11355	11356
68.18	12977	13089	13193	13345	13445	13479		68.18	11272	11284	11284	11286	11281	11283
68.199	12937	13056	13161	13321	13424	13466		68.199	11189	11195	11200	11203	11204	11203
68.22	12915	13038	13143	13314	13423	13469		68.22	11121	11136	11132	11136	11133	11134
68.239	12877	13010	13119	13287	13408	13454		68.239	11046	11055	11056	11057	11055	11052
68.26	12846	12981	13095	13284	13398	13447		68.26	10973	10978	10981	10985	10983	10981
68.279	12800	12946	13061	13258	13382	13430		68.279	10888	10894	10896	10900	10902	10894
68.3	12775	12915	13037	13242	13372	13429		68.3	10817	10817	10826	10825	10830	10822
68.319	12738	12886	13005	13216	13351	13412		68.319	10742	10737	10743	10744	10748	10738
68.339	12703	12853	12986	13198	13340	13405		68.339	10666	10670	10670	10670	10666	10660
68.36	12658	12815	12952	13178	13321	13393		68.36	10579	10582	10582	10582	10581	10569
68.379	12633	12781	12926	13161	13316	13392		68.379	10496	10501	10502	10501	10504	10493
68.4	12581	12743	12893	13134	13292	13364		68.4	10407	10412	10412	10411	10408	10407
68.419	12552	12719	12875	13123	13284	13360		68.419	10326	10327	10328	10330	10332	10322
68.44	12506	12682	12837	13093	13262	13344		68.44	10230	10231	10238	10240	10235	10234
68.459	12473	12652	12800	13073	13249	13331		68.459	10146	10148	10153	10159	10149	10142
68.48	12427	12609	12762	13045	13219	13311		68.48	10055	10059	10055	10064	10059	10057
68.5	12393	12577	12729	13020	13206	13300		68.5	9974	9981	9973	9975	9974	9968
68.519	12338	12531	12688	12983	13184	13275		68.519	9876	9884	9876	9880	9873	9868
68.54	12298	12498	12664	12961	13179	13274		68.54	9791	9799	9797	9794	9792	9787
68.559	12243	12443	12621	12926	13155	13252		68.559	9691	9702	9702	9701	9694	9692
68.58	12197	12399	12595	12912	13148	13248		68.58	9613	9615	9616	9618	9612	9609
68.599	12148	12352	12555	12883	13119	13226		68.599	9520	9522	9520	9519	9513	9507
68.62	12105	12319	12523	12852	13099	13211		68.62	9430	9433	9438	9430	9424	9422
68.639	12049	12270	12473	12820	13070	13187		68.639	9332	9334	9338	9333	9325	9323
68.66	12010	12234	12437	12796	13057	13175		68.66	9245	9249	9247	9243	9234	9231
68.68	11959	12179	12390	12761	13029	13149		68.68	9149	9155	9141	9142	9136	9129
68.699	11907	12139	12351	12734	13007	13134		68.699	9059	9058	9050	9054	9049	9042
68.72	11852	12079	12313	12692	12982	13116		68.72	8962	8960	8959	8954	8948	8948
68.739	11797	12042	12268	12663	12969	13093		68.739	8870	8871	8867	8865	8858	8855
68.76	11741	11977	12222	12627	12931	13073		68.76	8773	8771	8767	8760	8759	8757
68.779	11688	11932	12185	12602	12910	13058		68.779	8679	8675	8678	8675	8665	8667
68.8	11617	11869	12123	12555	12880	13022		68.8	8579	8569	8571	8572	8564	8558
68.819	11576	11835	12098	12541	12869	13023		68.819	8486	8486	8485	8483	8478	8469
68.839	11521	11788	12052	12499	12837	13001		68.839	8391	8395	8385	8380	8376	8367
68.86	11468	11745	12010	12464	12813	12982		68.86	8299	8297	8294	8287	8281	8269
68.879	11403	11677	11957	12419	12785	12953		68.879	8199	8196	8190	8186	8181	8177
68.9	11352	11624	11908	12390	12755	12934		68.9	8102	8100	8094	8090	8087	8078
68.919	11289	11573	11865	12346	12729	12910		68.919	8005	7994	7996	7990	7989	7973
68.94	11227	11524	11819	12316	12705	12889		68.94	7914	7906	7900	7902	7898	7881
68.959	11158	11459	11764	12267	12674	12862		68.959	7818	7805	7797	7803	7796	7780
68.98	11099	11405	11714	12235	12646	12850		68.98	7720	7712	7707	7702	7699	7690
69	11028	11342	11665	12197	12614	12814		69	7620	7606	7606	7604	7598	7582
69.019	10967	11281	11611	12156	12579	12795		69.019	7529	7513	7507	7501	7498	7487
69.04	10896	11212	11541	12107	12533	12757		69.04	7421	7408	7404	7398	7394	7386
69.059	10835	11158	11494	12069	12509	12732		69.059	7326	7316	7309	7308	7300	7292
69.08	10763	11091	11427	12014	12460	12698		69.08	7229	7214	7206	7213	7201	7190
69.099	10703	11029	11376	11978	12430	12679		69.099	7140	7123	7119	7123	7111	7096
69.12	10623	10960	11312	11921	12380	12629		69.12	7034	7024	7010	7020	7007	6994
69.139	10553	10895	11255	11873	12346	12601		69.139	6941	6927	6923	6922	6909	6900
69.16	10482	10828	11185	11825	12308	12572		69.16	6843	6827	6819	6823	6809	6801
69.18	10416	10772	11131	11784	12271	12542		69.18	6754	6732	6725	6729	6716	6711
69.199	10337	10706	11067	11730	12231	12510		69.199	6656	6640	6631	6634	6624	6616
69.22	10267	10643	11014	11685	12200	12482		69.22	6568	6550	6539	6544	6531	6525
69.239	10188	10563	10935	11617	12154	12438		69.239	6466	6451	6444	6442	6436	6432
69.26	10119	10491	10880	11572	12117	12413		69.26	6382	6360	6365	6354	6350	6341
69.279	10036	10410	10812	11516	12067	12380		69.279	6291	6271	6270	6261	6257	6247
69.3	9966	10342	10745	11476	12032	12349		69.3	6199	6187	6180	6175	6171	6156
69.319	9872	10254	10660	11400	11969	12287		69.319	6103	6092	6080	6070	6071	6063
69.339	9765	10160	10565	11309	11887	12214		69.339	5993	5988	5978	5967	5964	5958
69.36	9708	10104	10523	11275	11864	12206		69.36	5917	5909	5896	5892	5885	5881
69.379	9663	10053	10480	11252	11852	12194		69.379	5850	5836	5820	5821	5816	5809
69.4	9581	9977	10398	11196	11797	12151		69.4	5762	5744	5734	5734	5728	5724
69.419	9502	9910	10338	11140	11752	12119		69.419	5680	5663	5656	5646	5646	5643
69.44	9419	9824	10261	11075	11703	12066		69.44	5591	5580	5573	5569	5563	5557
69.459	9343	9749	10191	11018	11651	12028		69.459	5508	5491	5489	5485	5478	5472
69.48	9257	9661	10113	10951	11597	11972		69.48	5426	5406	5404	5401	5395	5395
69.5	9177	9587	10044	10893	11550	11942		69.5	5355	5330	5325	5326	5319	5318
69.519	9095	9508	9970	10831	11499	11890		69.519	5271	5250	5242	5244	5236	5236
69.54	9010	9431	9892	10762	11439	11841		69.54	5191	5170	5167	5159	5157	5148
69.559	8916	9345	9806	10692	11373	11783		69.559	5106	5080	5079	5077	5071	5067
69.58	8846	9275	9737	10640	11329	11747		69.58	5035	5010	5006	5009	5000	4996
69.599	8763	9196	9661	10576	11261	11694		69.599	4945	4923	4922	4924	4921	4912
69.62	8683	9117	9577	10511	11198	11642		69.62	4865	4844	4843	4842	4839	4835
69.639	8587	9031	9489	10424	11114	11572		69.639	4779	4764	4753	4754	4752	4743
69.66	8508	8955	9405	10348	11036	11507		69.66	4700	4679	4672	4674	4670	4660
69.68	8412	8860	9305	10255	10962	11427		69.68	4614	4596	4590	4588	4579	4574
69.699	8307	8755	9196	10156	10873	11341		69.699	4530	4514	4512	4508	4502	4493
69.72	8198	8650	9093	10062	10789	11260		69.72	4449	4428	4429	4425	4422	4414
69.739	8117	8577	9028	10008	10745	11227		69.739	4390	4371	4370	4365	4362	4352
69.76	8017	8475	8937	9928	10671	11159		69.76	4321	4299	4296	4299	4296	4280
69.779	7930	8390	8856	9850	10607	11099		69.779	4261	4240	4237	4238	4227	4227
69.8	7835	8292	8760	9763	10533	11026		69.8	4194	4182	4170	4172	4164	4160
69.819	7741	8201	8672	9685	10458	10968		69.819	4134	4118	4109	4112	4106	4097
69.839	7645	8103	8578	9601	10382	10898		69.839	4075	4057	4055	4052	4048	4037
69.86	7549	8010	8496	9528	10307	10838		69.86	4014	4004	3994	3996	3988	3982
69.879	7459	7917	8406	9443	10233	10762		69.879	3955	3945	3937	3939	3925	3927
69.9	7373	7838	8322	9370	10160	10700		69.9	3901	3887	3885	3882	3874	3871
69.919	7280	7745	8229	9283	10096	10624		69.919	3849	3832	3833	3826	3817	3815
69.94	7194	7659	8138	9205	10035	10565		69.94	3793	3778	3785	3777	3768	3765
69.959	7103	7563	8049	9119	9970	10505		69.959	3745	3725	3726	3719	3713	3711
69.98	7014	7481	7979	9051	9925	10461		69.98	3697	3683	3680	3678	3670	3664
70	6926	7396	7895	8972	9863	10406		70	3650	3635	3629	3631	3616	3624
70.019	6843	7307	7820	8911	9808	10358		70.019	3603	3589	3587	3580	3569	3575
70.04	6761	7225	7740	8841	9759	10309		70.04	3554	3543	3540	3535	3527	3532
70.059	6692	7146	7682	8782	9719	10272		70.059	3515	3510	3500	3497	3489	3495
70.08	6610	7065	7617	8712	9669	10228		70.08	3475	3464	3458	3454	3449	3450
70.099	6529	6994	7552	8655	9618	10190		70.099	3437	3420	3419	3416	3407	3408
70.12	6456	6913	7485	8600	9557	10142		70.12	3398	3385	3382	3377	3368	3367
70.139	6394	6848	7424	8544	9507	10106		70.139	3360	3358	3347	3340	3337	3334
70.16	6320	6779	7354	8483	9450	10052		70.16	3324	3315	3309	3303	3298	3298
70.18	6261	6717	7289	8426	9398	10002		70.18	3290	3280	3270	3272	3263	3266
70.199	6194	6650	7221	8361	9329	9949		70.199	3256	3243	3240	3232	3230	3230
70.22	6127	6589	7158	8297	9271	9899		70.22	3223	3209	3206	3202	3205	3197
70.239	6058	6518	7078	8219	9201	9837		70.239	3188	3180	3173	3169	3172	3163
70.26	5994	6442	7009	8152	9132	9777		70.26	3160	3148	3143	3142	3139	3129
70.279	5925	6366	6929	8078	9058	9706		70.279	3125	3108	3106	3105	3104	3098
70.3	5857	6304	6863	8017	8997	9649		70.3	3101	3081	3078	3076	3081	3076
70.319	5778	6231	6783	7941	8921	9587		70.319	3074	3062	3058	3055	3054	3047
70.339	5703	6160	6707	7865	8853	9522		70.339	3046	3034	3034	3025	3022	3021
70.36	5640	6080	6631	7788	8778	9452		70.36	3018	3006	3006	3004	2996	2998
70.379	5576	6012	6560	7715	8712	9386		70.379	2989	2983	2976	2986	2975	2974
70.4	5498	5940	6490	7641	8636	9326		70.4	2966	2958	2953	2961	2949	2950
70.419	5424	5867	6414	7562	8564	9254		70.419	2951	2939	2936	2934	2928	2931
70.44	5358	5793	6338	7484	8484	9177		70.44	2930	2918	2911	2910	2904	2903
70.459	5293	5727	6266	7412	8415	9113		70.459	2904	2895	2892	2894	2886	2887
70.479	5213	5645	6187	7331	8332	9031		70.479	2880	2870	2876	2871	2862	2867
70.5	5146	5573	6114	7254	8264	8964		70.5	2868	2857	2854	2849	2848	2846
70.519	5082	5507	6045	7185	8188	8896		70.519	2853	2842	2839	2836	2833	2832
70.54	5021	5442	5981	7118	8117	8832		70.54	2834	2828	2830	2825	2819	2819
70.559	4954	5370	5903	7040	8046	8760		70.559	2814	2812	2811	2806	2804	2809
70.58	4893	5303	5839	6972	7978	8695		70.58	2805	2803	2804	2798	2795	2797
70.599	4827	5236	5765	6893	7895	8620		70.599	2793	2787	2789	2783	2781	2784
70.62	4772	5171	5700	6822	7826	8550		70.62	2778	2776	2780	2778	2770	2771
70.639	4708	5108	5629	6745	7752	8477		70.639	2771	2770	2770	2757	2765	2757
70.66	4651	5045	5564	6677	7683	8415		70.66	2762	2761	2758	2745	2757	2759
70.68	4587	4980	5497	6602	7612	8341		70.68	2751	2755	2750	2747	2744	2752
70.699	4533	4922	5429	6531	7538	8271		70.699	2747	2745	2744	2740	2740	2748
70.72	4476	4861	5360	6458	7461	8194		70.72	2735	2736	2737	2732	2729	2739
70.739	4424	4803	5306	6395	7403	8134		70.739	2737	2735	2736	2732	2732	2732
70.76	4370	4738	5242	6327	7335	8060		70.76	2732	2733	2725	2727	2727	2731
70.779	4315	4680	5189	6258	7266	8001		70.779	2729	2725	2728	2723	2723	2730
70.8	4263	4624	5127	6186	7192	7932		70.8	2720	2722	2724	2725	2722	2729
70.819	4216	4577	5070	6127	7126	7866		70.819	2722	2725	2723	2727	2724	2725
70.839	4166	4518	5010	6050	7045	7787		70.839	2725	2726	2728	2726	2724	2730
70.86	4121	4463	4951	5989	6982	7718		70.86	2726	2723	2724	2722	2721	2728
70.879	4070	4407	4896	5919	6913	7641		70.879	2721	2722	2722	2727	2724	2731
70.9	4028	4362	4837	5856	6840	7577		70.9	2729	2726	2730	2727	2733	2736
70.919	3984	4316	4780	5786	6769	7497		70.919	2733	2730	2731	2728	2736	2736
70.94	3946	4266	4730	5727	6705	7431		70.94	2738	2735	2735	2730	2742	2735
70.959	3896	4207	4677	5657	6629	7350		70.959	2737	2736	2739	2737	2740	2737
70.979	3855	4157	4624	5592	6557	7279		70.979	2740	2740	2742	2742	2745	2744
71	3815	4110	4570	5520	6493	7207		71	2746	2749	2748	2751	2752	2751
71.019	3774	4065	4518	5464	6424	7148		71.019	2754	2755	2759	2759	2758	2761
71.04	3731	4021	4465	5398	6355	7073		71.04	2758	2766	2764	2764	2766	2768
71.059	3691	3982	4419	5343	6295	7005		71.059	2767	2773	2776	2784	2775	2778
71.08	3657	3938	4373	5281	6225	6933		71.08	2778	2783	2781	2788	2786	2786
71.099	3626	3901	4326	5225	6160	6872		71.099	2788	2794	2795	2793	2795	2800
71.12	3593	3855	4280	5164	6096	6805		71.12	2795	2802	2802	2803	2804	2808
71.139	3554	3817	4232	5103	6034	6730		71.139	2799	2812	2813	2812	2816	2820
71.16	3518	3776	4193	5045	5971	6660		71.16	2809	2821	2823	2829	2825	2832
71.18	3495	3743	4155	4996	5904	6602		71.18	2829	2836	2838	2842	2839	2844
71.199	3461	3708	4107	4935	5842	6538		71.199	2838	2847	2848	2852	2852	2857
71.22	3436	3675	4071	4885	5785	6478		71.22	2851	2863	2862	2869	2865	2872
71.239	3403	3636	4030	4824	5723	6408		71.239	2867	2875	2880	2879	2879	2885
71.26	3377	3608	3993	4777	5660	6339		71.26	2880	2896	2901	2896	2894	2901
71.279	3348	3571	3949	4723	5595	6269		71.279	2894	2904	2908	2907	2910	2913
71.3	3322	3541	3911	4675	5532	6207		71.3	2912	2923	2917	2921	2925	2927
71.319	3295	3512	3871	4621	5475	6136		71.319	2923	2936	2934	2932	2936	2943
71.339	3272	3485	3835	4577	5416	6073		71.339	2939	2949	2952	2952	2955	2964
71.36	3248	3447	3797	4528	5358	6008		71.36	2956	2968	2971	2969	2972	2978
71.379	3231	3428	3767	4483	5300	5950		71.379	2973	2985	2990	2987	2991	2997
71.4	3211	3399	3732	4430	5235	5882		71.4	2988	3002	3002	3004	3005	3012
71.419	3188	3371	3697	4385	5183	5814		71.419	3004	3018	3017	3023	3024	3029
71.44	3170	3344	3662	4336	5126	5745		71.44	3024	3036	3037	3040	3040	3048
71.459	3152	3327	3631	4296	5074	5690		71.459	3043	3058	3057	3061	3060	3069
71.479	3134	3302	3595	4246	5017	5628		71.479	3058	3072	3069	3077	3083	3084
71.5	3118	3280	3572	4208	4971	5573		71.5	3084	3094	3093	3100	3102	3105
71.519	3101	3256	3542	4171	4921	5515		71.519	3100	3123	3111	3116	3128	3122
71.54	3090	3240	3516	4129	4875	5464		71.54	3123	3133	3134	3144	3148	3149
71.559	3071	3220	3492	4083	4819	5404		71.559	3146	3154	3156	3162	3167	3165
71.58	3057	3204	3473	4045	4773	5352		71.58	3170	3178	3180	3183	3190	3192
71.599	3043	3186	3442	4008	4719	5296		71.599	3190	3191	3195	3201	3210	3206
71.62	3036	3172	3420	3974	4679	5249		71.62	3206	3218	3221	3225	3232	3235
71.639	3027	3154	3400	3938	4625	5190		71.639	3229	3241	3246	3245	3253	3256
71.66	3024	3147	3381	3907	4578	5138		71.66	3252	3265	3267	3273	3279	3280
71.68	3016	3122	3356	3872	4528	5083		71.68	3271	3282	3287	3294	3300	3295
71.699	3015	3111	3337	3840	4488	5038		71.699	3295	3308	3311	3315	3322	3322
71.72	3005	3097	3315	3799	4440	4973		71.72	3310	3325	3326	3338	3337	3342
71.739	2995	3085	3289	3770	4394	4919		71.739	3331	3346	3350	3360	3360	3357
71.76	2987	3070	3273	3738	4352	4867		71.76	3357	3371	3375	3378	3384	3380
71.779	2975	3059	3252	3701	4304	4819		71.779	3378	3389	3396	3397	3405	3410
71.8	2973	3053	3233	3676	4264	4773		71.8	3400	3417	3417	3430	3431	3435
71.819	2973	3043	3222	3655	4238	4732		71.819	3426	3440	3452	3455	3455	3458
71.839	2965	3032	3206	3621	4194	4686		71.839	3446	3459	3472	3477	3479	3478
71.86	2962	3023	3191	3597	4155	4633		71.86	3470	3486	3492	3501	3505	3504
71.879	2957	3020	3177	3566	4118	4591		71.879	3500	3515	3518	3526	3527	3531
71.9	2955	3012	3168	3541	4086	4548		71.9	3523	3543	3550	3551	3551	3553
71.919	2955	3003	3157	3518	4052	4506		71.919	3543	3566	3573	3570	3575	3576
71.94	2955	3002	3144	3500	4020	4469		71.94	3567	3589	3596	3596	3600	3606
71.959	2954	2993	3136	3475	3984	4424		71.959	3596	3614	3612	3617	3625	3631
71.979	2956	2992	3133	3450	3950	4387		71.979	3622	3645	3640	3643	3653	3660
72	2957	2990	3123	3426	3914	4345		72	3643	3662	3661	3671	3670	3682
72.019	2963	2987	3112	3412	3887	4311		72.019	3667	3683	3693	3697	3697	3706
72.04	2964	2981	3097	3395	3851	4273		72.04	3692	3710	3719	3721	3729	3729
72.059	2963	2983	3096	3378	3829	4236		72.059	3721	3737	3744	3747	3751	3756
72.08	2966	2983	3095	3358	3801	4197		72.08	3743	3761	3767	3771	3776	3781
72.099	2977	2987	3085	3343	3770	4165		72.099	3770	3790	3795	3798	3798	3807
72.12	2978	2987	3082	3334	3745	4136		72.12	3796	3813	3824	3827	3827	3833
72.139	2984	2990	3079	3324	3717	4099		72.139	3826	3839	3849	3853	3859	3861
72.16	2998	2993	3075	3303	3693	4069		72.16	3846	3861	3866	3874	3884	3884
72.18	3001	2999	3064	3286	3666	4029		72.18	3874	3888	3895	3902	3910	3907
72.199	3003	2999	3060	3270	3636	4000		72.199	3900	3912	3923	3922	3936	3933
72.22	3018	3006	3069	3267	3627	3978		72.22	3930	3940	3949	3955	3964	3960
72.239	3027	3010	3062	3253	3599	3934		72.239	3952	3965	3968	3975	3986	3987
72.26	3033	3015	3061	3240	3577	3910		72.26	3984	3998	4001	4006	4013	4014
72.279	3042	3018	3064	3234	3561	3881		72.279	4008	4025	4033	4036	4040	4040
72.3	3055	3020	3066	3224	3543	3863		72.3	4033	4050	4059	4065	4069	4067
72.319	3066	3027	3070	3212	3523	3832		72.319	4058	4079	4081	4096	4095	4102
72.339	3075	3029	3074	3205	3506	3805		72.339	4094	4117	4116	4130	4131	4138
72.36	3080	3039	3077	3197	3490	3785		72.36	4131	4148	4156	4164	4158	4165
72.379	3097	3052	3086	3188	3479	3766		72.379	4165	4183	4193	4200	4195	4202
72.4	3111	3057	3096	3192	3456	3743		72.4	4195	4214	4223	4228	4229	4233
72.419	3127	3075	3097	3186	3443	3720		72.419	4231	4249	4250	4264	4264	4270
72.44	3141	3082	3104	3184	3428	3696		72.44	4262	4283	4283	4296	4294	4303
72.459	3161	3093	3114	3181	3415	3681		72.459	4291	4316	4320	4324	4326	4335
72.479	3170	3095	3119	3175	3400	3653		72.479	4311	4335	4343	4347	4347	4358
72.5	3188	3116	3127	3172	3393	3635		72.5	4340	4363	4369	4374	4376	4383
72.519	3200	3123	3131	3177	3379	3615		72.519	4368	4391	4400	4401	4399	4405
72.54	3213	3139	3138	3170	3365	3597		72.54	4398	4418	4427	4423	4429	4436
72.559	3231	3153	3148	3167	3353	3579		72.559	4424	4447	4455	4455	4456	4466
72.58	3253	3169	3164	3177	3354	3572		72.58	4458	4486	4488	4488	4494	4502
72.599	3268	3183	3174	3174	3345	3553		72.599	4487	4511	4521	4517	4520	4536
72.62	3284	3197	3185	3177	3339	3539		72.62	4517	4541	4552	4553	4555	4564
72.639	3302	3209	3192	3187	3329	3522		72.639	4548	4573	4581	4581	4585	4595
72.66	3321	3226	3210	3177	3325	3512		72.66	4585	4606	4613	4615	4622	4635
72.68	3334	3239	3222	3184	3323	3496		72.68	4612	4636	4642	4645	4655	4662
72.699	3353	3256	3232	3184	3313	3486		72.699	4641	4666	4677	4679	4682	4694
72.72	3367	3271	3246	3190	3307	3476		72.72	4674	4697	4708	4709	4713	4719
72.739	3385	3285	3254	3193	3303	3463		72.739	4707	4731	4734	4745	4747	4750
72.76	3402	3295	3267	3191	3293	3451		72.76	4728	4761	4760	4767	4774	4777
72.779	3423	3316	3280	3195	3291	3440		72.779	4758	4785	4790	4802	4803	4810
72.8	3433	3328	3293	3197	3281	3427		72.8	4792	4815	4819	4827	4830	4835
72.819	3455	3344	3306	3205	3277	3418		72.819	4823	4844	4847	4852	4862	4869
72.839	3475	3358	3307	3207	3272	3403		72.839	4842	4871	4870	4881	4890	4891
72.86	3490	3374	3321	3217	3271	3392		72.86	4876	4897	4905	4907	4919	4919
72.879	3507	3383	3334	3216	3267	3381		72.879	4898	4922	4927	4934	4945	4940
72.9	3526	3401	3345	3224	3264	3372		72.9	4930	4949	4956	4960	4976	4969
72.919	3537	3412	3355	3223	3257	3357		72.919	4953	4975	4981	4986	4996	4996
72.94	3553	3434	3364	3223	3254	3354		72.94	4980	5003	5012	5017	5016	5024
72.959	3576	3449	3374	3229	3249	3346		72.959	5000	5026	5036	5041	5043	5050
72.979	3598	3463	3386	3233	3246	3335		72.979	5026	5052	5059	5068	5071	5076
73	3605	3477	3401	3233	3241	3320		73	5055	5073	5079	5092	5097	5100
73.019	3626	3496	3409	3248	3246	3309		73.019	5084	5103	5109	5118	5123	5133
73.04	3644	3503	3418	3253	3243	3305		73.04	5097	5128	5132	5145	5145	5145
73.059	3662	3517	3433	3256	3241	3303		73.059	5115	5149	5154	5163	5170	5171
73.08	3677	3534	3450	3263	3242	3295		73.08	5142	5171	5180	5184	5186	5193
73.099	3696	3556	3464	3272	3241	3298		73.099	5167	5203	5206	5211	5217	5218
73.12	3709	3568	3477	3270	3244	3285		73.12	5190	5222	5229	5233	5241	5245
73.139	3732	3585	3492	3274	3242	3280		73.139	5216	5242	5249	5260	5270	5268
73.16	3745	3592	3502	3285	3238	3279		73.16	5237	5267	5271	5283	5286	5286
73.18	3764	3608	3520	3304	3244	3278		73.18	5266	5301	5312	5312	5313	5319
73.199	3785	3627	3532	3302	3245	3270		73.199	5290	5320	5333	5333	5332	5344
73.22	3810	3645	3553	3311	3249	3268		73.22	5317	5346	5359	5357	5362	5368
73.239	3824	3660	3564	3318	3255	3268		73.239	5341	5368	5376	5379	5385	5388
73.26	3839	3677	3573	3332	3255	3265		73.26	5362	5394	5399	5405	5407	5412
73.279	3856	3695	3585	3339	3258	3265		73.279	5386	5409	5418	5420	5427	5438
73.3	3871	3708	3597	3345	3256	3263		73.3	5401	5430	5439	5441	5444	5460
73.319	3888	3723	3606	3356	3266	3259		73.319	5428	5451	5463	5469	5470	5480
73.339	3907	3735	3622	3366	3267	3261		73.339	5447	5480	5484	5491	5492	5502
73.36	3921	3754	3631	3369	3268	3257		73.36	5467	5493	5505	5506	5511	5520
73.379	3934	3767	3648	3383	3275	3259		73.379	5487	5511	5526	5521	5534	5538
73.4	3952	3773	3659	3387	3279	3257		73.4	5507	5529	5539	5541	5548	5554
73.419	3967	3795	3673	3396	3280	3254		73.419	5525	5549	5559	5563	5567	5574
73.44	3973	3807	3679	3401	3282	3251		73.44	5533	5553	5568	5569	5576	5586
73.459	3992	3822	3693	3413	3295	3255		73.459	5554	5574	5582	5585	5592	5604
73.479	4011	3834	3709	3420	3302	3257		73.479	5571	5593	5607	5605	5613	5625
73.5	4025	3849	3725	3430	3304	3259		73.5	5589	5611	5622	5634	5634	5633
73.519	4037	3863	3737	3438	3304	3259		73.519	5604	5624	5635	5638	5644	5648
73.54	4049	3881	3746	3449	3312	3263		73.54	5621	5642	5651	5653	5661	5672
73.559	4068	3896	3763	3461	3315	3269		73.559	5636	5660	5670	5669	5677	5684
73.58	4088	3909	3770	3476	3323	3270		73.58	5650	5678	5684	5691	5694	5699
73.599	4102	3921	3785	3489	3329	3269		73.599	5662	5691	5696	5704	5710	5715
73.62	4120	3944	3803	3501	3340	3279		73.62	5683	5708	5716	5721	5730	5732
73.639	4137	3959	3815	3510	3344	3283		73.639	5697	5719	5736	5734	5737	5745
73.66	4156	3981	3832	3523	3356	3283		73.66	5713	5735	5747	5756	5754	5760
73.68	4171	3994	3838	3535	3367	3296		73.68	5732	5752	5757	5771	5768	5781
73.699	4193	4016	3864	3550	3375	3304		73.699	5748	5775	5783	5792	5790	5798
73.72	4212	4036	3879	3562	3386	3306		73.72	5767	5789	5800	5805	5805	5814
73.739	4235	4059	3903	3575	3397	3323		73.739	5796	5824	5828	5833	5833	5842
73.76	4234	4058	3892	3576	3398	3310		73.76	5782	5811	5817	5823	5821	5832
73.779	4229	4047	3884	3574	3387	3298		73.779	5748	5783	5790	5796	5799	5811
73.8	4244	4065	3908	3589	3402	3311		73.8	5780	5809	5818	5820	5822	5831
73.819	4294	4112	3948	3624	3431	3343		73.819	5844	5873	5882	5876	5882	5887
73.839	4316	4129	3966	3639	3442	3352		73.839	5858	5889	5901	5896	5899	5906
73.86	4333	4146	3983	3647	3463	3360		73.86	5875	5903	5913	5916	5920	5925
73.879	4343	4161	3997	3661	3468	3368		73.879	5887	5917	5927	5919	5929	5937
73.9	4366	4180	4011	3674	3480	3384		73.9	5903	5936	5943	5936	5944	5954
73.919	4385	4194	4025	3689	3496	3389		73.919	5919	5948	5956	5954	5960	5969
73.94	4403	4214	4045	3706	3511	3399		73.94	5945	5970	5970	5973	5978	5990
73.959	4420	4228	4063	3723	3520	3413		73.959	5952	5988	5984	5991	5992	6005
73.979	4436	4249	4085	3740	3533	3424		73.979	5966	6005	6008	6014	6017	6025
74	4455	4255	4095	3751	3545	3435		74	5979	6010	6022	6024	6023	6037
74.019	4474	4277	4112	3768	3561	3449		74.019	5999	6032	6038	6038	6042	6055
74.04	4493	4296	4136	3785	3577	3460		74.04	6020	6054	6054	6058	6065	6072
74.059	4517	4320	4157	3809	3594	3479		74.059	6040	6075	6072	6081	6089	6095
74.08	4526	4340	4169	3822	3603	3488		74.08	6061	6086	6095	6097	6103	6108
74.099	4549	4362	4190	3840	3619	3504		74.099	6081	6110	6116	6114	6122	6126
74.12	4566	4378	4204	3855	3638	3516		74.12	6096	6134	6124	6131	6138	6147
74.139	4589	4397	4223	3873	3652	3535		74.139	6121	6147	6146	6152	6158	6167
74.16	4608	4414	4246	3890	3667	3545		74.16	6137	6153	6162	6168	6173	6170
74.18	4627	4437	4273	3915	3685	3557		74.18	6156	6175	6182	6185	6193	6186
74.199	4644	4455	4285	3921	3701	3577		74.199	6168	6197	6197	6201	6213	6209
74.22	4670	4471	4308	3943	3726	3594		74.22	6187	6218	6223	6225	6230	6233
74.239	4677	4488	4326	3961	3738	3608		74.239	6202	6230	6238	6237	6240	6248
74.26	4704	4517	4345	3980	3759	3622		74.26	6221	6250	6256	6258	6265	6264
74.279	4721	4533	4360	3995	3773	3640		74.279	6234	6268	6270	6276	6280	6283
74.3	4733	4549	4377	4015	3788	3659		74.3	6253	6279	6284	6294	6297	6300
74.319	4755	4564	4387	4035	3804	3670		74.319	6269	6296	6299	6309	6310	6314
74.339	4775	4590	4415	4051	3822	3684		74.339	6295	6320	6325	6335	6335	6343
74.36	4798	4605	4429	4069	3835	3695		74.36	6305	6335	6332	6347	6349	6355
74.379	4816	4625	4448	4087	3849	3712		74.379	6324	6350	6354	6365	6364	6373
74.4	4832	4646	4463	4106	3864	3732		74.4	6333	6367	6372	6377	6372	6386
74.419	4853	4666	4488	4131	3882	3750		74.419	6352	6390	6394	6394	6393	6406
74.44	4869	4685	4502	4144	3900	3766		74.44	6367	6397	6404	6410	6410	6416
74.459	4894	4702	4522	4160	3921	3784		74.459	6386	6417	6426	6435	6428	6438
74.479	4907	4725	4539	4180	3940	3801		74.479	6401	6438	6443	6449	6444	6456
74.5	4932	4747	4566	4202	3955	3814		74.5	6424	6463	6465	6467	6470	6471
74.519	4950	4755	4574	4215	3966	3830		74.519	6436	6469	6478	6475	6478	6489
74.54	4964	4776	4591	4232	3985	3846		74.54	6454	6485	6491	6497	6493	6502
74.559	4979	4796	4614	4254	4008	3863		74.559	6478	6503	6507	6511	6510	6527
74.58	5006	4817	4636	4274	4032	3883		74.58	6495	6526	6529	6535	6540	6553
74.599	5024	4834	4649	4288	4047	3896		74.599	6504	6542	6548	6548	6559	6561
74.62	5043	4854	4671	4308	4063	3918		74.62	6524	6559	6565	6565	6569	6584
74.639	5058	4874	4690	4325	4082	3936		74.639	6547	6571	6576	6584	6581	6595
74.66	5085	4894	4710	4346	4100	3954		74.66	6563	6588	6595	6601	6598	6610
74.68	5103	4905	4726	4365	4120	3971		74.68	6568	6602	6609	6610	6614	6620
74.699	5121	4928	4749	4383	4141	3992		74.699	6591	6623	6629	6629	6630	6644
74.72	5141	4942	4767	4399	4154	4011		74.72	6602	6630	6636	6644	6643	6658
74.739	5155	4969	4785	4424	4182	4032		74.739	6622	6648	6651	6661	6662	6675
74.76	5165	4978	4802	4442	4196	4047		74.76	6636	6658	6670	6668	6673	6689
74.779	5191	4999	4817	4463	4211	4062		74.779	6653	6672	6683	6690	6690	6702
74.8	5210	5021	4839	4476	4234	4081		74.8	6669	6691	6695	6711	6712	6713
74.819	5231	5043	4863	4500	4260	4110		74.819	6692	6712	6717	6723	6728	6733
74.839	5243	5057	4877	4520	4275	4124		74.839	6698	6721	6729	6735	6741	6754
74.86	5265	5077	4895	4536	4290	4146		74.86	6718	6743	6746	6755	6758	6758
74.879	5282	5095	4912	4558	4314	4163		74.879	6732	6758	6765	6768	6773	6782
74.9	5304	5115	4943	4584	4338	4190		74.9	6747	6771	6783	6783	6788	6798
74.919	5323	5135	4957	4602	4356	4210		74.919	6761	6787	6791	6802	6802	6807
74.94	5344	5159	4988	4626	4378	4227		74.94	6787	6813	6820	6826	6822	6829
74.959	5358	5177	4998	4641	4394	4244		74.959	6796	6824	6829	6842	6837	6845
74.979	5379	5196	5021	4666	4416	4270		74.979	6816	6842	6850	6861	6858	6865
75	5396	5217	5041	4684	4438	4288		75	6827	6858	6861	6873	6869	6877
75.019	5415	5234	5062	4702	4462	4306		75.019	6847	6874	6880	6892	6889	6897
75.04	5432	5249	5076	4720	4482	4330		75.04	6858	6885	6890	6901	6896	6906
75.059	5459	5277	5101	4743	4500	4356		75.059	6877	6902	6912	6918	6920	6923
75.08	5474	5290	5116	4765	4518	4373		75.08	6894	6916	6923	6931	6929	6940
75.099	5492	5306	5135	4791	4545	4393		75.099	6912	6934	6946	6950	6947	6953
75.12	5508	5330	5160	4811	4566	4419		75.12	6927	6951	6961	6967	6966	6973
75.139	5533	5360	5182	4838	4592	4438		75.139	6946	6973	6980	6988	6982	6991
75.16	5545	5369	5191	4853	4605	4454		75.16	6943	6974	6979	6984	6982	6987
75.18	5551	5372	5200	4863	4616	4466		75.18	6949	6980	6987	6988	6986	6993
75.199	5587	5408	5236	4898	4649	4494		75.199	6993	7018	7021	7028	7028	7034
75.22	5615	5444	5261	4924	4679	4532		75.22	7021	7045	7052	7054	7056	7069
75.239	5633	5462	5277	4942	4695	4550		75.239	7028	7057	7062	7068	7064	7077
75.26	5654	5483	5302	4966	4715	4574		75.26	7046	7077	7080	7089	7085	7096
75.279	5672	5491	5318	4983	4734	4590		75.279	7064	7087	7093	7100	7100	7108
75.3	5690	5517	5341	5004	4769	4613		75.3	7083	7104	7108	7118	7118	7131
75.319	5710	5533	5358	5027	4783	4637		75.319	7091	7121	7123	7131	7139	7141
75.339	5731	5558	5383	5048	4806	4660		75.339	7104	7142	7141	7151	7150	7151
75.36	5750	5573	5396	5073	4828	4679		75.36	7116	7151	7149	7155	7160	7161
75.379	5778	5600	5425	5092	4854	4704		75.379	7138	7167	7165	7174	7175	7181
75.4	5794	5613	5448	5112	4873	4728		75.4	7155	7178	7184	7182	7186	7194
75.419	5817	5638	5471	5137	4900	4760		75.419	7170	7191	7197	7201	7208	7213
75.44	5835	5655	5488	5165	4925	4782		75.44	7182	7207	7209	7219	7221	7225
75.459	5858	5681	5512	5185	4948	4807		75.459	7203	7227	7231	7238	7241	7245
75.479	5877	5695	5535	5202	4970	4829		75.479	7216	7239	7238	7244	7256	7249
75.5	5893	5717	5559	5228	4998	4860		75.5	7233	7253	7261	7258	7272	7269
75.519	5912	5736	5570	5251	5023	4878		75.519	7242	7268	7271	7278	7282	7285
75.54	5935	5757	5595	5278	5045	4906		75.54	7261	7285	7288	7295	7297	7301
75.559	5948	5773	5610	5292	5066	4925		75.559	7265	7284	7292	7299	7305	7303
75.58	5962	5792	5631	5314	5090	4947		75.58	7275	7297	7308	7315	7314	7312
75.599	5971	5800	5639	5332	5104	4962		75.599	7281	7306	7309	7316	7312	7322
75.62	6006	5837	5676	5361	5140	5001		75.62	7310	7333	7336	7346	7345	7347
75.639	6033	5860	5704	5385	5170	5026		75.639	7332	7355	7355	7370	7367	7376
75.66	6058	5885	5723	5412	5196	5052		75.66	7351	7377	7382	7386	7384	7394
75.68	6073	5901	5743	5432	5225	5080		75.68	7364	7388	7389	7395	7396	7402
75.699	6083	5923	5772	5459	5244	5108		75.699	7384	7400	7406	7413	7408	7413
75.72	6102	5941	5791	5477	5273	5128		75.72	7386	7414	7415	7423	7421	7429
75.739	6122	5964	5810	5500	5292	5153		75.739	7403	7425	7427	7436	7434	7443
75.76	6136	5979	5829	5521	5316	5177		75.76	7413	7435	7439	7445	7444	7456
75.779	6165	6001	5856	5547	5346	5211		75.779	7431	7459	7464	7468	7470	7473
75.8	6180	6022	5870	5566	5370	5232		75.8	7444	7468	7476	7476	7483	7485
75.819	6201	6044	5889	5591	5397	5260		75.819	7453	7486	7494	7493	7496	7499
75.839	6222	6057	5904	5610	5413	5281		75.839	7466	7499	7501	7499	7502	7510
75.86	6240	6083	5933	5640	5438	5308		75.86	7485	7512	7516	7513	7522	7527
75.879	6260	6101	5955	5658	5464	5337		75.879	7493	7524	7526	7526	7536	7536
75.9	6283	6126	5977	5685	5491	5364		75.9	7506	7538	7544	7547	7549	7559
75.919	6303	6147	5996	5706	5512	5383		75.919	7523	7548	7553	7554	7559	7568
75.94	6322	6172	6016	5737	5545	5412		75.94	7545	7567	7569	7572	7576	7587
75.959	6342	6192	6035	5755	5564	5437		75.959	7554	7576	7583	7589	7593	7597
75.979	6365	6215	6054	5776	5589	5461		75.979	7568	7596	7598	7607	7607	7613
76	6379	6232	6080	5800	5612	5484		76	7581	7605	7610	7614	7616	7619
76.019	6398	6254	6097	5821	5646	5515		76.019	7598	7616	7617	7630	7631	7634
76.04	6412	6271	6114	5843	5666	5540		76.04	7607	7633	7629	7644	7644	7647
76.059	6438	6293	6134	5862	5686	5563		76.059	7617	7643	7649	7657	7662	7658
76.08	6458	6306	6157	5883	5706	5585		76.08	7634	7652	7657	7662	7670	7674
76.099	6482	6334	6182	5910	5739	5618		76.099	7655	7669	7676	7678	7688	7688
76.12	6498	6351	6199	5930	5767	5634		76.12	7667	7681	7686	7691	7702	7695
76.139	6526	6370	6223	5957	5796	5666		76.139	7679	7700	7704	7710	7719	7714
76.16	6545	6389	6244	5974	5815	5685		76.16	7686	7713	7713	7723	7727	7728
76.18	6562	6409	6266	6005	5841	5724		76.18	7704	7729	7735	7739	7744	7750
76.199	6579	6429	6284	6022	5867	5751		76.199	7717	7739	7742	7754	7751	7753
76.22	6606	6454	6308	6049	5897	5773		76.22	7734	7755	7755	7768	7767	7768
76.239	6618	6473	6326	6070	5921	5798		76.239	7746	7768	7767	7778	7784	7782
76.26	6645	6494	6352	6093	5949	5829		76.26	7763	7789	7787	7795	7800	7801
76.279	6658	6512	6369	6118	5972	5855		76.279	7771	7798	7802	7812	7809	7812
76.3	6678	6532	6395	6143	5997	5882		76.3	7788	7814	7821	7824	7826	7826
76.319	6691	6548	6408	6155	6014	5893		76.319	7790	7815	7823	7828	7831	7828
76.339	6710	6575	6432	6186	6046	5927		76.339	7808	7831	7837	7843	7848	7846
76.36	6731	6591	6450	6207	6070	5954		76.36	7821	7845	7852	7857	7855	7859
76.379	6758	6618	6476	6231	6097	5985		76.379	7845	7868	7868	7883	7880	7875
76.4	6771	6633	6493	6248	6120	6006		76.4	7849	7873	7881	7889	7889	7889
76.419	6789	6647	6515	6272	6146	6033		76.419	7861	7890	7900	7901	7899	7904
76.44	6804	6660	6530	6296	6165	6055		76.44	7874	7897	7902	7909	7906	7909
76.459	6826	6687	6560	6321	6196	6083		76.459	7893	7919	7919	7929	7923	7928
76.479	6846	6711	6581	6343	6221	6109		76.479	7901	7933	7931	7938	7935	7937
76.5	6869	6735	6603	6366	6252	6133		76.5	7918	7945	7945	7950	7955	7956
76.519	6881	6747	6623	6386	6265	6158		76.519	7924	7951	7948	7956	7959	7962
76.54	6909	6768	6645	6412	6297	6191		76.54	7941	7970	7966	7972	7970	7980
76.559	6918	6786	6665	6435	6319	6215		76.559	7955	7981	7977	7986	7982	7988
76.58	6949	6813	6686	6456	6353	6242		76.58	7971	7992	7995	8004	8004	8004
76.599	6963	6829	6705	6475	6370	6265		76.599	7979	8002	8003	8010	8014	8022
76.62	6986	6855	6722	6500	6392	6295		76.62	7995	8019	8022	8028	8028	8035
76.639	7005	6877	6742	6525	6417	6321		76.639	8007	8028	8029	8038	8033	8043
76.66	7031	6900	6770	6549	6445	6345		76.66	8024	8043	8043	8053	8050	8057
76.68	7048	6917	6789	6570	6467	6370		76.68	8032	8059	8060	8065	8067	8068
76.699	7068	6942	6817	6600	6494	6390		76.699	8050	8067	8068	8077	8084	8084
76.72	7077	6953	6818	6612	6504	6406		76.72	8043	8063	8062	8070	8070	8085
76.739	7082	6961	6830	6622	6517	6423		76.739	8041	8063	8064	8070	8074	8077
76.76	7099	6979	6844	6639	6541	6449		76.76	8059	8078	8074	8082	8090	8090
76.779	7140	7008	6881	6673	6576	6485		76.779	8091	8111	8108	8119	8120	8121
76.8	7162	7037	6913	6705	6599	6513		76.8	8110	8129	8129	8134	8145	8139
76.819	7184	7060	6938	6732	6626	6545		76.819	8128	8142	8153	8152	8161	8155
76.839	7203	7075	6952	6750	6652	6563		76.839	8131	8156	8155	8160	8163	8163
76.86	7227	7096	6974	6769	6675	6589		76.86	8150	8162	8164	8177	8176	8180
76.879	7240	7111	6992	6796	6689	6605		76.879	8152	8167	8174	8180	8188	8187
76.9	7260	7135	7013	6817	6725	6634		76.9	8172	8187	8194	8196	8204	8202
76.919	7279	7152	7033	6829	6741	6654		76.919	8182	8198	8198	8210	8212	8214
76.94	7303	7176	7049	6854	6768	6685		76.94	8196	8212	8216	8232	8231	8235
76.959	7316	7193	7070	6874	6785	6700		76.959	8202	8220	8225	8239	8237	8240
76.979	7339	7208	7091	6903	6807	6722		76.979	8216	8237	8245	8256	8253	8252
77	7355	7225	7106	6919	6828	6749		77	8230	8249	8255	8259	8263	8265
77.019	7372	7247	7129	6942	6853	6774		77.019	8241	8261	8270	8275	8275	8281
77.04	7388	7267	7145	6957	6870	6792		77.04	8252	8268	8273	8285	8284	8286
77.059	7408	7287	7163	6977	6896	6816		77.059	8266	8283	8289	8297	8294	8301
77.08	7422	7297	7182	6999	6918	6837		77.08	8273	8294	8309	8303	8310	8311
77.099	7445	7324	7213	7024	6940	6859		77.099	8296	8315	8323	8322	8328	8330
77.12	7462	7339	7226	7041	6959	6883		77.12	8305	8321	8329	8332	8334	8340
77.139	7489	7366	7250	7073	6988	6913		77.139	8321	8337	8347	8343	8346	8355
77.16	7503	7381	7270	7086	7012	6932		77.16	8327	8350	8351	8355	8358	8366
77.18	7523	7401	7289	7111	7036	6960		77.18	8341	8367	8366	8365	8371	8379
77.199	7537	7417	7313	7135	7061	6982		77.199	8357	8380	8378	8380	8385	8391
77.22	7559	7442	7339	7160	7084	7010		77.22	8372	8393	8394	8398	8404	8407
77.239	7574	7457	7356	7183	7105	7029		77.239	8383	8403	8407	8411	8414	8420
77.26	7596	7483	7386	7209	7133	7062		77.26	8402	8424	8428	8432	8431	8441
77.279	7624	7509	7406	7230	7160	7082		77.279	8419	8436	8445	8446	8447	8452
77.3	7641	7528	7434	7251	7182	7108		77.3	8440	8458	8456	8465	8470	8466
77.319	7661	7544	7446	7274	7211	7126		77.319	8454	8467	8467	8473	8475	8481
77.339	7690	7572	7470	7298	7236	7157		77.339	8471	8481	8484	8494	8495	8503
77.36	7709	7594	7490	7322	7255	7182		77.36	8485	8494	8506	8511	8513	8517
77.379	7734	7622	7521	7351	7280	7213		77.379	8506	8523	8528	8537	8533	8540
77.4	7749	7645	7538	7372	7302	7233		77.4	8524	8539	8541	8545	8544	8549
77.419	7780	7672	7566	7404	7330	7258		77.419	8545	8557	8563	8568	8575	8571
77.44	7797	7685	7579	7418	7347	7283		77.44	8563	8569	8578	8580	8592	8578
77.459	7815	7714	7604	7443	7373	7306		77.459	8580	8603	8599	8605	8606	8605
77.479	7837	7735	7630	7470	7398	7326		77.479	8599	8624	8619	8620	8624	8622
77.5	7867	7759	7654	7499	7428	7358		77.5	8626	8642	8642	8647	8649	8650
77.519	7890	7776	7679	7519	7443	7379		77.519	8639	8659	8658	8661	8668	8666
77.54	7915	7805	7697	7543	7470	7406		77.54	8657	8681	8678	8687	8688	8697
77.559	7938	7822	7717	7562	7493	7425		77.559	8675	8696	8696	8705	8701	8704
77.58	7962	7855	7740	7586	7525	7459		77.58	8703	8723	8726	8729	8724	8728
77.599	7978	7871	7761	7612	7539	7477		77.599	8715	8733	8738	8746	8743	8749
77.62	8009	7893	7797	7644	7569	7507		77.62	8746	8759	8763	8771	8768	8777
77.639	8029	7910	7817	7654	7586	7522		77.639	8754	8773	8778	8784	8778	8786
77.66	8040	7921	7823	7667	7602	7531		77.66	8758	8787	8787	8795	8785	8794
77.68	8065	7948	7842	7691	7635	7566		77.68	8786	8809	8809	8816	8811	8816
77.699	8097	7980	7880	7724	7664	7598		77.699	8822	8844	8840	8845	8848	8853
77.72	8109	7994	7896	7744	7679	7614		77.72	8836	8852	8857	8861	8856	8866
77.739	8133	8020	7926	7773	7707	7644		77.739	8857	8879	8886	8890	8879	8890
77.76	8150	8039	7942	7786	7732	7663		77.76	8875	8898	8902	8898	8903	8903
77.779	8180	8071	7970	7817	7758	7697		77.779	8902	8927	8922	8923	8925	8925
77.8	8200	8089	7988	7835	7777	7715		77.8	8913	8941	8940	8946	8942	8946
77.819	8211	8099	8004	7850	7793	7738		77.819	8931	8953	8954	8949	8959	8962
77.839	8236	8125	8029	7880	7820	7760		77.839	8949	8970	8977	8972	8977	8982
77.86	8271	8163	8060	7912	7860	7792		77.86	8985	9004	9005	9005	9011	9019
77.879	8290	8181	8077	7931	7877	7817		77.879	9004	9025	9024	9026	9027	9038
77.9	8313	8205	8108	7963	7906	7849		77.9	9030	9050	9047	9049	9058	9064
77.919	8328	8222	8130	7984	7931	7867		77.919	9045	9071	9071	9073	9075	9076
77.94	8356	8254	8158	8012	7961	7898		77.94	9073	9102	9100	9099	9097	9108
77.959	8377	8273	8171	8026	7979	7913		77.959	9095	9115	9120	9120	9119	9126
77.979	8401	8297	8201	8050	8002	7942		77.979	9118	9143	9138	9141	9146	9149
78	8420	8318	8222	8075	8023	7964		78	9142	9166	9161	9158	9167	9172
78.02	8455	8344	8250	8107	8056	7987		78.02	9166	9189	9183	9188	9194	9198
78.04	8469	8363	8263	8116	8069	8008		78.04	9185	9201	9201	9204	9208	9210
78.059	8495	8382	8285	8139	8095	8035		78.059	9214	9226	9231	9230	9240	9240
78.08	8505	8398	8294	8155	8110	8046		78.08	9228	9246	9244	9242	9257	9259
78.099	8536	8427	8323	8178	8138	8076		78.099	9257	9273	9273	9276	9284	9287
78.119	8551	8444	8334	8200	8153	8096		78.119	9273	9291	9289	9292	9304	9294
78.139	8571	8468	8364	8218	8180	8117		78.139	9296	9311	9313	9316	9323	9322
78.16	8585	8479	8373	8236	8195	8134		78.16	9306	9322	9324	9330	9334	9336
78.18	8610	8504	8399	8264	8219	8166		78.18	9329	9350	9354	9362	9361	9367
78.199	8629	8525	8418	8281	8241	8183		78.199	9348	9373	9365	9374	9379	9381
78.22	8651	8546	8439	8310	8266	8212		78.22	9375	9389	9391	9399	9402	9402
78.239	8670	8563	8463	8327	8288	8228		78.239	9385	9410	9410	9414	9421	9416
78.26	8691	8581	8492	8352	8319	8257		78.26	9411	9430	9434	9438	9441	9438
78.279	8708	8602	8513	8376	8341	8277		78.279	9423	9447	9447	9452	9455	9458
78.3	8738	8629	8541	8405	8374	8311		78.3	9457	9475	9477	9480	9486	9483
78.319	8764	8648	8565	8426	8394	8339		78.319	9476	9491	9498	9500	9502	9508
78.339	8788	8678	8590	8456	8420	8364		78.339	9503	9525	9524	9526	9529	9533
78.36	8807	8697	8607	8479	8437	8385		78.36	9520	9544	9545	9543	9546	9546
78.379	8839	8722	8637	8504	8464	8414		78.379	9554	9569	9575	9574	9580	9579
78.4	8860	8742	8650	8518	8478	8429		78.4	9569	9587	9590	9593	9600	9599
78.419	8884	8773	8673	8542	8503	8449		78.419	9597	9619	9618	9618	9620	9626
78.44	8899	8786	8693	8556	8520	8460		78.44	9613	9639	9641	9635	9634	9644
78.459	8923	8814	8717	8587	8554	8494		78.459	9643	9671	9663	9671	9672	9670
78.479	8940	8824	8731	8602	8570	8512		78.479	9664	9685	9683	9687	9686	9692
78.5	8957	8842	8761	8620	8591	8535		78.5	9680	9706	9704	9711	9713	9719
78.52	8971	8854	8770	8633	8606	8552		78.52	9696	9713	9720	9716	9723	9730
78.54	8991	8878	8789	8659	8630	8573		78.54	9710	9735	9736	9742	9745	9747
78.559	9015	8902	8817	8681	8657	8599		78.559	9737	9757	9760	9764	9770	9772
78.58	9038	8918	8842	8707	8684	8628		78.58	9765	9785	9789	9787	9791	9794
78.599	9047	8934	8859	8729	8705	8647		78.599	9777	9797	9801	9803	9804	9807
78.619	9070	8955	8888	8756	8735	8672		78.619	9800	9817	9818	9821	9828	9833
78.639	9089	8968	8904	8774	8753	8691		78.639	9818	9828	9830	9836	9841	9845
78.66	9113	8995	8935	8798	8779	8722		78.66	9845	9857	9860	9867	9865	9871
78.68	9128	9012	8958	8819	8802	8746		78.68	9869	9876	9880	9887	9889	9894
78.699	9153	9039	8989	8846	8830	8773		78.699	9901	9907	9915	9920	9922	9924
78.72	9173	9062	9007	8868	8851	8793		78.72	9917	9931	9937	9939	9946	9946
78.739	9199	9087	9036	8893	8879	8821		78.739	9947	9961	9964	9966	9972	9969
78.76	9222	9104	9058	8915	8899	8844		78.76	9974	9988	9985	9990	9996	9994
78.779	9246	9133	9086	8951	8932	8870		78.779	9996	10011	10016	10020	10023	10023
78.8	9261	9150	9109	8968	8953	8889		78.8	10019	10033	10036	10043	10045	10046
78.819	9290	9178	9132	8994	8975	8916		78.819	10044	10058	10057	10066	10072	10074
78.839	9314	9192	9151	9011	8997	8936		78.839	10066	10079	10079	10085	10087	10090
78.86	9336	9225	9174	9043	9020	8967		78.86	10094	10112	10111	10116	10119	10119
78.879	9352	9241	9198	9058	9040	8979		78.879	10113	10125	10128	10137	10137	10135
78.9	9378	9260	9214	9082	9067	9005		78.9	10136	10151	10150	10162	10160	10161
78.919	9395	9277	9230	9103	9084	9028		78.919	10151	10164	10164	10171	10176	10176
78.94	9418	9307	9259	9131	9107	9054		78.94	10173	10189	10192	10201	10197	10200
78.959	9433	9321	9281	9157	9131	9081		78.959	10188	10201	10204	10215	10211	10214
78.979	9454	9345	9305	9184	9163	9104		78.979	10213	10226	10224	10235	10239	10237
79	9477	9361	9328	9196	9186	9125		79	10230	10241	10239	10250	10248	10249
79.02	9501	9387	9355	9232	9214	9156		79.02	10253	10265	10264	10278	10274	10273
79.04	9516	9403	9374	9251	9229	9171		79.04	10268	10284	10288	10288	10292	10287
79.059	9542	9427	9397	9273	9257	9201		79.059	10286	10308	10314	10310	10314	10317
79.08	9559	9439	9413	9292	9276	9219		79.08	10304	10322	10323	10325	10334	10328
79.099	9587	9468	9449	9316	9307	9249		79.099	10331	10350	10353	10356	10361	10354
79.119	9607	9486	9460	9339	9320	9269		79.119	10351	10366	10368	10368	10376	10378
79.139	9630	9508	9490	9364	9346	9291		79.139	10376	10395	10394	10397	10401	10405
79.16	9642	9523	9510	9387	9359	9305		79.16	10389	10404	10408	10409	10412	10418
79.18	9665	9545	9536	9408	9385	9333		79.18	10409	10428	10431	10434	10441	10445
79.199	9682	9560	9549	9423	9403	9347		79.199	10429	10444	10448	10445	10459	10462
79.22	9710	9581	9574	9448	9427	9382		79.22	10455	10478	10477	10477	10483	10487
79.239	9718	9593	9589	9465	9449	9388		79.239	10467	10489	10487	10494	10497	10498
79.26	9738	9617	9610	9482	9476	9415		79.26	10487	10507	10508	10514	10523	10517
79.279	9749	9631	9624	9495	9493	9431		79.279	10507	10518	10518	10523	10533	10530
79.3	9770	9653	9649	9521	9517	9459		79.3	10530	10544	10536	10543	10552	10558
79.319	9782	9661	9664	9540	9532	9475		79.319	10538	10549	10552	10560	10568	10568
79.339	9807	9690	9693	9569	9562	9503		79.339	10561	10577	10579	10589	10593	10592
79.36	9825	9707	9707	9590	9582	9525		79.36	10584	10595	10590	10601	10609	10604
79.379	9840	9725	9730	9607	9609	9549		79.379	10606	10615	10612	10619	10640	10627
79.4	9852	9733	9744	9624	9624	9561		79.4	10614	10624	10627	10633	10642	10632
79.419	9874	9757	9770	9654	9658	9596		79.419	10636	10655	10651	10655	10664	10656
79.44	9885	9773	9788	9668	9670	9610		79.44	10649	10665	10664	10672	10673	10670
79.459	9907	9790	9821	9690	9688	9637		79.459	10666	10681	10684	10688	10695	10690
79.479	9924	9805	9830	9710	9706	9653		79.479	10681	10694	10699	10702	10710	10705
79.5	9950	9829	9851	9736	9739	9680		79.5	10703	10723	10725	10726	10734	10732
79.52	9959	9850	9873	9751	9755	9700		79.52	10721	10738	10746	10745	10750	10744
79.54	9988	9876	9903	9780	9783	9728		79.54	10744	10763	10769	10777	10775	10776
79.559	10005	9885	9916	9796	9795	9743		79.559	10768	10783	10783	10795	10791	10792
79.58	10026	9901	9937	9818	9821	9772		79.58	10782	10802	10808	10814	10815	10819
79.599	10044	9925	9950	9833	9849	9789		79.599	10795	10813	10819	10822	10829	10831
79.619	10061	9946	9973	9858	9874	9811		79.619	10820	10841	10837	10842	10846	10850
79.639	10070	9960	9988	9869	9888	9828		79.639	10829	10852	10848	10864	10859	10866
79.66	10094	9977	10016	9898	9914	9861		79.66	10852	10870	10881	10884	10883	10889
79.68	10108	9993	10031	9910	9930	9881		79.68	10876	10889	10894	10893	10896	10904
79.699	10126	10018	10053	9936	9956	9904		79.699	10897	10915	10917	10916	10921	10921
79.72	10139	10031	10073	9957	9973	9922		79.72	10904	10927	10930	10933	10939	10937
79.739	10156	10050	10096	9981	9995	9944		79.739	10927	10947	10950	10948	10955	10958
79.76	10169	10055	10104	9992	10010	9959		79.76	10944	10958	10959	10960	10968	10970
79.779	10187	10070	10126	10014	10030	9977		79.779	10958	10978	10977	10978	10980	10984
79.8	10202	10083	10146	10025	10052	9999		79.8	10965	10984	10986	10988	10994	10997
79.819	10225	10112	10173	10059	10092	10027		79.819	10995	11014	11013	11017	11027	11030
79.839	10244	10130	10197	10077	10113	10053		79.839	11010	11030	11031	11033	11045	11049
79.86	10272	10150	10221	10102	10133	10079		79.86	11038	11053	11055	11061	11060	11066
79.879	10281	10160	10236	10122	10147	10095		79.879	11045	11056	11069	11070	11069	11068
79.9	10302	10180	10262	10144	10174	10115		79.9	11068	11081	11088	11091	11091	11096
79.919	10316	10200	10279	10163	10193	10140		79.919	11085	11098	11103	11102	11112	11112
79.94	10342	10226	10304	10187	10219	10162		79.94	11115	11124	11132	11131	11140	11140
79.959	10350	10245	10317	10210	10241	10177		79.959	11133	11138	11145	11155	11156	11156
79.979	10375	10257	10347	10231	10270	10206		79.979	11153	11164	11167	11171	11179	11175
80	10386	10267	10361	10248	10287	10230		80	11163	11178	11182	11179	11190	11195

## Sheet: Fig.5bc Ion shifts&Fitting
Fig. 5b,c Description: Experimental resonance-angle shift data and fitting curve data for SPR+BP-COOH responses to different metal ions and bare-Au SPR response to Pb²⁺. Data included: Experimental data points used for Fig. 5b and Fig. 5c, and fitting curve data used for Fig. 5b. Samples: 13 nm SPR+BP-COOH bare-Au SPR Ions: Pb²⁺, Cd²⁺, Cu²⁺, Zn²⁺, Ni²⁺, Ca²⁺ and Mg²⁺ X-axis: Metal-ion concentrati…
(b) (c) Experimental data points						(b) Fitting curve data
Ion	Sensor	Concentration (M)	Resonance-angle shift Δθ (mdeg)			Ion	Pb²⁺					Cd²⁺			Cu²⁺			Zn²⁺			Ni²⁺			Ca²⁺			Mg²⁺
Pb²⁺	SPR+BP-COOH	1e-19	100			Sensor	SPR+BP-COOH		bare-Au SPR			SPR+BP-COOH			SPR+BP-COOH			SPR+BP-COOH			SPR+BP-COOH			SPR+BP-COOH			SPR+BP-COOH
		1e-18	280				Concentration (M)	Fitted Δθ (mdeg)	Concentration (M)	Fitted Δθ (mdeg)		Concentration (M)	Fitted Δθ (mdeg)		Concentration (M)	Fitted Δθ (mdeg)		Concentration (M)	Fitted Δθ (mdeg)		Concentration (M)	Fitted Δθ (mdeg)		Concentration (M)	Fitted Δθ (mdeg)		Concentration (M)	Fitted Δθ (mdeg)
		1e-17	600				1e-19	198.715	1e-06	64.1311		1e-13	101.795		1e-13	121.895		1e-12	88.3036		1e-10	32.3016		1e-09	87.0532		1e-08	43.5606
		1e-16	1161				1.00926e-19	199.152	1.00926e-06	64.3071		1.00926e-13	102.057		1.00926e-13	122.166		1.00926e-12	88.5463		1.00926e-10	32.4239		1.00926e-09	87.2549		1.00926e-08	43.6722
		1e-15	1721				1.01861e-19	199.589	1.01861e-06	64.4836		1.01861e-13	102.319		1.01861e-13	122.438		1.01861e-12	88.7897		1.01861e-10	32.5466		1.01861e-09	87.4571		1.01861e-08	43.7841
	bare-Au SPR	1e-06	85				1.02804e-19	200.027	1.02804e-06	64.6606		1.02804e-13	102.582		1.02804e-13	122.71		1.02804e-12	89.0337		1.02804e-10	32.6697		1.02804e-09	87.6598		1.02804e-08	43.8962
		1e-05	158				1.03757e-19	200.466	1.03757e-06	64.8381		1.03757e-13	102.846		1.03757e-13	122.983		1.03757e-12	89.2784		1.03757e-10	32.7933		1.03757e-09	87.863		1.03757e-08	44.0087
		0.0001	239				1.04718e-19	200.906	1.04718e-06	65.016		1.04718e-13	103.111		1.04718e-13	123.257		1.04718e-12	89.5238		1.04718e-10	32.9174		1.04718e-09	88.0666		1.04718e-08	44.1214
		0.001	479				1.05688e-19	201.347	1.05688e-06	65.1945		1.05688e-13	103.376		1.05688e-13	123.531		1.05688e-12	89.7698		1.05688e-10	33.042		1.05688e-09	88.2707		1.05688e-08	44.2345
		0.01	1000				1.06666e-19	201.789	1.06666e-06	65.3734		1.06666e-13	103.642		1.06666e-13	123.806		1.06666e-12	90.0166		1.06666e-10	33.1671		1.06666e-09	88.4753		1.06666e-08	44.3478
							1.07654e-19	202.232	1.07654e-06	65.5528		1.07654e-13	103.908		1.07654e-13	124.081		1.07654e-12	90.264		1.07654e-10	33.2926		1.07654e-09	88.6804		1.07654e-08	44.4614
Cd²⁺	SPR+BP-COOH	1e-13	59				1.08652e-19	202.676	1.08652e-06	65.7327		1.08652e-13	104.175		1.08652e-13	124.357		1.08652e-12	90.512		1.08652e-10	33.4186		1.08652e-09	88.8859		1.08652e-08	44.5753
		1e-12	180				1.09658e-19	203.121	1.09658e-06	65.9132		1.09658e-13	104.443		1.09658e-13	124.634		1.09658e-12	90.7608		1.09658e-10	33.545		1.09658e-09	89.0919		1.09658e-08	44.6895
		1e-11	400				1.10674e-19	203.567	1.10674e-06	66.0941		1.10674e-13	104.712		1.10674e-13	124.911		1.10674e-12	91.0102		1.10674e-10	33.672		1.10674e-09	89.2984		1.10674e-08	44.804
		1e-10	699				1.11699e-19	204.014	1.11699e-06	66.2755		1.11699e-13	104.981		1.11699e-13	125.189		1.11699e-12	91.2604		1.11699e-10	33.7994		1.11699e-09	89.5053		1.11699e-08	44.9188
		1e-09	1320				1.12733e-19	204.462	1.12733e-06	66.4574		1.12733e-13	105.251		1.12733e-13	125.467		1.12733e-12	91.5112		1.12733e-10	33.9273		1.12733e-09	89.7128		1.12733e-08	45.0338
							1.13777e-19	204.911	1.13777e-06	66.6398		1.13777e-13	105.522		1.13777e-13	125.746		1.13777e-12	91.7627		1.13777e-10	34.0557		1.13777e-09	89.9207		1.13777e-08	45.1492
Cu²⁺	SPR+BP-COOH	1e-13	79				1.14831e-19	205.361	1.14831e-06	66.8227		1.14831e-13	105.793		1.14831e-13	126.026		1.14831e-12	92.0149		1.14831e-10	34.1846		1.14831e-09	90.1291		1.14831e-08	45.2649
		1e-12	200				1.15895e-19	205.811	1.15895e-06	67.0061		1.15895e-13	106.065		1.15895e-13	126.306		1.15895e-12	92.2678		1.15895e-10	34.3139		1.15895e-09	90.338		1.15895e-08	45.3808
		1e-11	360				1.16968e-19	206.263	1.16968e-06	67.19		1.16968e-13	106.338		1.16968e-13	126.587		1.16968e-12	92.5214		1.16968e-10	34.4438		1.16968e-09	90.5474		1.16968e-08	45.4971
		1e-10	700				1.18052e-19	206.716	1.18052e-06	67.3744		1.18052e-13	106.612		1.18052e-13	126.869		1.18052e-12	92.7757		1.18052e-10	34.5741		1.18052e-09	90.7572		1.18052e-08	45.6136
		1e-09	1100				1.19145e-19	207.17	1.19145e-06	67.5593		1.19145e-13	106.886		1.19145e-13	127.151		1.19145e-12	93.0307		1.19145e-10	34.705		1.19145e-09	90.9676		1.19145e-08	45.7305
							1.20249e-19	207.625	1.20249e-06	67.7448		1.20249e-13	107.161		1.20249e-13	127.434		1.20249e-12	93.2863		1.20249e-10	34.8363		1.20249e-09	91.1784		1.20249e-08	45.8477
Zn²⁺	SPR+BP-COOH	1e-12	59				1.21362e-19	208.08	1.21362e-06	67.9307		1.21362e-13	107.436		1.21362e-13	127.717		1.21362e-12	93.5427		1.21362e-10	34.9681		1.21362e-09	91.3897		1.21362e-08	45.9651
		1e-11	220				1.22486e-19	208.537	1.22486e-06	68.1172		1.22486e-13	107.713		1.22486e-13	128.001		1.22486e-12	93.7998		1.22486e-10	35.1004		1.22486e-09	91.6015		1.22486e-08	46.0829
		1e-10	360				1.23621e-19	208.995	1.23621e-06	68.3041		1.23621e-13	107.99		1.23621e-13	128.286		1.23621e-12	94.0576		1.23621e-10	35.2333		1.23621e-09	91.8138		1.23621e-08	46.2009
		1e-09	659				1.24766e-19	209.454	1.24766e-06	68.4916		1.24766e-13	108.267		1.24766e-13	128.572		1.24766e-12	94.3161		1.24766e-10	35.3666		1.24766e-09	92.0266		1.24766e-08	46.3193
		1e-08	1379				1.25922e-19	209.914	1.25922e-06	68.6796		1.25922e-13	108.546		1.25922e-13	128.858		1.25922e-12	94.5753		1.25922e-10	35.5004		1.25922e-09	92.2399		1.25922e-08	46.4379
							1.27088e-19	210.374	1.27088e-06	68.8681		1.27088e-13	108.825		1.27088e-13	129.144		1.27088e-12	94.8353		1.27088e-10	35.6348		1.27088e-09	92.4537		1.27088e-08	46.5569
Ni²⁺	SPR+BP-COOH	1e-10	60				1.28265e-19	210.836	1.28265e-06	69.0571		1.28265e-13	109.105		1.28265e-13	129.431		1.28265e-12	95.0959		1.28265e-10	35.7696		1.28265e-09	92.6679		1.28265e-08	46.6762
		1e-09	100				1.29453e-19	211.299	1.29453e-06	69.2466		1.29453e-13	109.385		1.29453e-13	129.719		1.29453e-12	95.3573		1.29453e-10	35.905		1.29453e-09	92.8827		1.29453e-08	46.7957
		1e-08	280				1.30652e-19	211.763	1.30652e-06	69.4367		1.30652e-13	109.667		1.30652e-13	130.008		1.30652e-12	95.6194		1.30652e-10	36.0409		1.30652e-09	93.098		1.30652e-08	46.9156
		1e-07	481				1.31862e-19	212.228	1.31862e-06	69.6273		1.31862e-13	109.949		1.31862e-13	130.297		1.31862e-12	95.8822		1.31862e-10	36.1773		1.31862e-09	93.3137		1.31862e-08	47.0358
		1e-06	1420				1.33083e-19	212.694	1.33083e-06	69.8184		1.33083e-13	110.232		1.33083e-13	130.587		1.33083e-12	96.1457		1.33083e-10	36.3142		1.33083e-09	93.53		1.33083e-08	47.1563
							1.34316e-19	213.161	1.34316e-06	70.01		1.34316e-13	110.515		1.34316e-13	130.877		1.34316e-12	96.4099		1.34316e-10	36.4516		1.34316e-09	93.7468		1.34316e-08	47.2771
Ca²⁺	SPR+BP-COOH	1e-09	101				1.3556e-19	213.629	1.3556e-06	70.2022		1.3556e-13	110.799		1.3556e-13	131.168		1.3556e-12	96.6749		1.3556e-10	36.5895		1.3556e-09	93.9641		1.3556e-08	47.3982
		1e-08	180				1.36816e-19	214.098	1.36816e-06	70.3948		1.36816e-13	111.084		1.36816e-13	131.46		1.36816e-12	96.9406		1.36816e-10	36.728		1.36816e-09	94.1818		1.36816e-08	47.5197
		1e-07	241				1.38083e-19	214.568	1.38083e-06	70.5881		1.38083e-13	111.37		1.38083e-13	131.753		1.38083e-12	97.207		1.38083e-10	36.867		1.38083e-09	94.4001		1.38083e-08	47.6414
		1e-06	500				1.39362e-19	215.039	1.39362e-06	70.7818		1.39362e-13	111.656		1.39362e-13	132.046		1.39362e-12	97.4742		1.39362e-10	37.0065		1.39362e-09	94.6189		1.39362e-08	47.7635
		1e-05	881				1.40653e-19	215.511	1.40653e-06	70.9761		1.40653e-13	111.943		1.40653e-13	132.339		1.40653e-12	97.7421		1.40653e-10	37.1465		1.40653e-09	94.8382		1.40653e-08	47.8858
							1.41955e-19	215.984	1.41955e-06	71.1709		1.41955e-13	112.231		1.41955e-13	132.634		1.41955e-12	98.0107		1.41955e-10	37.2871		1.41955e-09	95.058		1.41955e-08	48.0085
Mg²⁺	SPR+BP-COOH	1e-08	40				1.4327e-19	216.458	1.4327e-06	71.3662		1.4327e-13	112.52		1.4327e-13	132.929		1.4327e-12	98.2801		1.4327e-10	37.4282		1.4327e-09	95.2783		1.4327e-08	48.1315
		1e-07	100				1.44597e-19	216.933	1.44597e-06	71.5621		1.44597e-13	112.809		1.44597e-13	133.224		1.44597e-12	98.5502		1.44597e-10	37.5699		1.44597e-09	95.4991		1.44597e-08	48.2548
		1e-06	140				1.45937e-19	217.409	1.45937e-06	71.7585		1.45937e-13	113.1		1.45937e-13	133.521		1.45937e-12	98.8211		1.45937e-10	37.712		1.45937e-09	95.7204		1.45937e-08	48.3784
		1e-05	301				1.47288e-19	217.887	1.47288e-06	71.9555		1.47288e-13	113.39		1.47288e-13	133.818		1.47288e-12	99.0927		1.47288e-10	37.8547		1.47288e-09	95.9423		1.47288e-08	48.5024
		0.0001	561				1.48652e-19	218.365	1.48652e-06	72.153		1.48652e-13	113.682		1.48652e-13	134.115		1.48652e-12	99.365		1.48652e-10	37.998		1.48652e-09	96.1646		1.48652e-08	48.6266
							1.50029e-19	218.844	1.50029e-06	72.351		1.50029e-13	113.974		1.50029e-13	134.414		1.50029e-12	99.6381		1.50029e-10	38.1418		1.50029e-09	96.3875		1.50029e-08	48.7512
							1.51419e-19	219.325	1.51419e-06	72.5496		1.51419e-13	114.268		1.51419e-13	134.713		1.51419e-12	99.912		1.51419e-10	38.2861		1.51419e-09	96.6109		1.51419e-08	48.8761
							1.52821e-19	219.806	1.52821e-06	72.7487		1.52821e-13	114.561		1.52821e-13	135.012		1.52821e-12	100.187		1.52821e-10	38.431		1.52821e-09	96.8348		1.52821e-08	49.0013
							1.54237e-19	220.289	1.54237e-06	72.9484		1.54237e-13	114.856		1.54237e-13	135.313		1.54237e-12	100.462		1.54237e-10	38.5764		1.54237e-09	97.0593		1.54237e-08	49.1268
							1.55665e-19	220.772	1.55665e-06	73.1486		1.55665e-13	115.151		1.55665e-13	135.614		1.55665e-12	100.738		1.55665e-10	38.7224		1.55665e-09	97.2842		1.55665e-08	49.2527
							1.57107e-19	221.257	1.57107e-06	73.3494		1.57107e-13	115.448		1.57107e-13	135.915		1.57107e-12	101.015		1.57107e-10	38.869		1.57107e-09	97.5097		1.57107e-08	49.3789
							1.58562e-19	221.743	1.58562e-06	73.5507		1.58562e-13	115.744		1.58562e-13	136.217		1.58562e-12	101.293		1.58562e-10	39.0161		1.58562e-09	97.7357		1.58562e-08	49.5054
							1.60031e-19	222.23	1.60031e-06	73.7525		1.60031e-13	116.042		1.60031e-13	136.52		1.60031e-12	101.571		1.60031e-10	39.1637		1.60031e-09	97.9622		1.60031e-08	49.6322
							1.61513e-19	222.717	1.61513e-06	73.955		1.61513e-13	116.341		1.61513e-13	136.824		1.61513e-12	101.85		1.61513e-10	39.3119		1.61513e-09	98.1892		1.61513e-08	49.7593
							1.63009e-19	223.206	1.63009e-06	74.158		1.63009e-13	116.64		1.63009e-13	137.128		1.63009e-12	102.13		1.63009e-10	39.4607		1.63009e-09	98.4168		1.63009e-08	49.8868
							1.64519e-19	223.696	1.64519e-06	74.3615		1.64519e-13	116.94		1.64519e-13	137.433		1.64519e-12	102.411		1.64519e-10	39.61		1.64519e-09	98.6449		1.64519e-08	50.0146
							1.66043e-19	224.187	1.66043e-06	74.5656		1.66043e-13	117.241		1.66043e-13	137.739		1.66043e-12	102.692		1.66043e-10	39.7599		1.66043e-09	98.8735		1.66043e-08	50.1427
							1.67581e-19	224.68	1.67581e-06	74.7703		1.67581e-13	117.542		1.67581e-13	138.046		1.67581e-12	102.974		1.67581e-10	39.9104		1.67581e-09	99.1027		1.67581e-08	50.2712
							1.69133e-19	225.173	1.69133e-06	74.9755		1.69133e-13	117.844		1.69133e-13	138.353		1.69133e-12	103.257		1.69133e-10	40.0614		1.69133e-09	99.3323		1.69133e-08	50.4
							1.70699e-19	225.667	1.70699e-06	75.1813		1.70699e-13	118.147		1.70699e-13	138.66		1.70699e-12	103.541		1.70699e-10	40.213		1.70699e-09	99.5626		1.70699e-08	50.5291
							1.72281e-19	226.163	1.72281e-06	75.3876		1.72281e-13	118.451		1.72281e-13	138.969		1.72281e-12	103.826		1.72281e-10	40.3652		1.72281e-09	99.7933		1.72281e-08	50.6585
							1.73876e-19	226.659	1.73876e-06	75.5945		1.73876e-13	118.756		1.73876e-13	139.278		1.73876e-12	104.111		1.73876e-10	40.5179		1.73876e-09	100.025		1.73876e-08	50.7883
							1.75487e-19	227.157	1.75487e-06	75.802		1.75487e-13	119.061		1.75487e-13	139.588		1.75487e-12	104.397		1.75487e-10	40.6713		1.75487e-09	100.256		1.75487e-08	50.9184
							1.77112e-19	227.655	1.77112e-06	76.0101		1.77112e-13	119.368		1.77112e-13	139.898		1.77112e-12	104.684		1.77112e-10	40.8252		1.77112e-09	100.489		1.77112e-08	51.0489
							1.78753e-19	228.155	1.78753e-06	76.2187		1.78753e-13	119.675		1.78753e-13	140.209		1.78753e-12	104.972		1.78753e-10	40.9797		1.78753e-09	100.722		1.78753e-08	51.1797
							1.80408e-19	228.656	1.80408e-06	76.4279		1.80408e-13	119.982		1.80408e-13	140.521		1.80408e-12	105.26		1.80408e-10	41.1347		1.80408e-09	100.955		1.80408e-08	51.3108
							1.82079e-19	229.158	1.82079e-06	76.6376		1.82079e-13	120.291		1.82079e-13	140.834		1.82079e-12	105.55		1.82079e-10	41.2904		1.82079e-09	101.189		1.82079e-08	51.4422
							1.83766e-19	229.661	1.83766e-06	76.848		1.83766e-13	120.6		1.83766e-13	141.147		1.83766e-12	105.84		1.83766e-10	41.4467		1.83766e-09	101.424		1.83766e-08	51.574
							1.85468e-19	230.165	1.85468e-06	77.0589		1.85468e-13	120.91		1.85468e-13	141.461		1.85468e-12	106.131		1.85468e-10	41.6035		1.85468e-09	101.659		1.85468e-08	51.7062
							1.87186e-19	230.67	1.87186e-06	77.2704		1.87186e-13	121.221		1.87186e-13	141.776		1.87186e-12	106.422		1.87186e-10	41.7609		1.87186e-09	101.894		1.87186e-08	51.8386
							1.88919e-19	231.177	1.88919e-06	77.4825		1.88919e-13	121.533		1.88919e-13	142.091		1.88919e-12	106.715		1.88919e-10	41.919		1.88919e-09	102.13		1.88919e-08	51.9714
							1.90669e-19	231.684	1.90669e-06	77.6952		1.90669e-13	121.846		1.90669e-13	142.407		1.90669e-12	107.008		1.90669e-10	42.0776		1.90669e-09	102.367		1.90669e-08	52.1046
							1.92435e-19	232.193	1.92435e-06	77.9084		1.92435e-13	122.159		1.92435e-13	142.724		1.92435e-12	107.302		1.92435e-10	42.2368		1.92435e-09	102.604		1.92435e-08	52.238
							1.94217e-19	232.703	1.94217e-06	78.1222		1.94217e-13	122.473		1.94217e-13	143.041		1.94217e-12	107.597		1.94217e-10	42.3967		1.94217e-09	102.842		1.94217e-08	52.3719
							1.96016e-19	233.214	1.96016e-06	78.3367		1.96016e-13	122.788		1.96016e-13	143.359		1.96016e-12	107.893		1.96016e-10	42.5571		1.96016e-09	103.081		1.96016e-08	52.506
							1.97832e-19	233.726	1.97832e-06	78.5517		1.97832e-13	123.104		1.97832e-13	143.678		1.97832e-12	108.189		1.97832e-10	42.7182		1.97832e-09	103.319		1.97832e-08	52.6405
							1.99664e-19	234.239	1.99664e-06	78.7673		1.99664e-13	123.421		1.99664e-13	143.998		1.99664e-12	108.487		1.99664e-10	42.8798		1.99664e-09	103.559		1.99664e-08	52.7754
							2.01514e-19	234.753	2.01514e-06	78.9835		2.01514e-13	123.738		2.01514e-13	144.318		2.01514e-12	108.785		2.01514e-10	43.0421		2.01514e-09	103.799		2.01514e-08	52.9106
							2.0338e-19	235.268	2.0338e-06	79.2002		2.0338e-13	124.056		2.0338e-13	144.639		2.0338e-12	109.084		2.0338e-10	43.205		2.0338e-09	104.039		2.0338e-08	53.0461
							2.05264e-19	235.785	2.05264e-06	79.4176		2.05264e-13	124.375		2.05264e-13	144.961		2.05264e-12	109.384		2.05264e-10	43.3685		2.05264e-09	104.281		2.05264e-08	53.182
							2.07165e-19	236.302	2.07165e-06	79.6356		2.07165e-13	124.695		2.07165e-13	145.283		2.07165e-12	109.684		2.07165e-10	43.5326		2.07165e-09	104.522		2.07165e-08	53.3183
							2.09084e-19	236.821	2.09084e-06	79.8542		2.09084e-13	125.016		2.09084e-13	145.606		2.09084e-12	109.986		2.09084e-10	43.6973		2.09084e-09	104.765		2.09084e-08	53.4549
							2.1102e-19	237.341	2.1102e-06	80.0733		2.1102e-13	125.337		2.1102e-13	145.93		2.1102e-12	110.288		2.1102e-10	43.8627		2.1102e-09	105.007		2.1102e-08	53.5918
							2.12975e-19	237.862	2.12975e-06	80.2931		2.12975e-13	125.66		2.12975e-13	146.255		2.12975e-12	110.591		2.12975e-10	44.0287		2.12975e-09	105.251		2.12975e-08	53.7291
							2.14947e-19	238.384	2.14947e-06	80.5135		2.14947e-13	125.983		2.14947e-13	146.58		2.14947e-12	110.895		2.14947e-10	44.1953		2.14947e-09	105.495		2.14947e-08	53.8668
							2.16938e-19	238.907	2.16938e-06	80.7345		2.16938e-13	126.307		2.16938e-13	146.906		2.16938e-12	111.2		2.16938e-10	44.3625		2.16938e-09	105.739		2.16938e-08	54.0048
							2.18948e-19	239.432	2.18948e-06	80.9561		2.18948e-13	126.632		2.18948e-13	147.233		2.18948e-12	111.506		2.18948e-10	44.5304		2.18948e-09	105.984		2.18948e-08	54.1431
							2.20976e-19	239.958	2.20976e-06	81.1783		2.20976e-13	126.957		2.20976e-13	147.56		2.20976e-12	111.812		2.20976e-10	44.6989		2.20976e-09	106.23		2.20976e-08	54.2818
							2.23022e-19	240.484	2.23022e-06	81.4011		2.23022e-13	127.284		2.23022e-13	147.889		2.23022e-12	112.119		2.23022e-10	44.8681		2.23022e-09	106.476		2.23022e-08	54.4209
							2.25088e-19	241.012	2.25088e-06	81.6245		2.25088e-13	127.611		2.25088e-13	148.218		2.25088e-12	112.427		2.25088e-10	45.0379		2.25088e-09	106.723		2.25088e-08	54.5603
							2.27173e-19	241.541	2.27173e-06	81.8485		2.27173e-13	127.94		2.27173e-13	148.547		2.27173e-12	112.736		2.27173e-10	45.2083		2.27173e-09	106.97		2.27173e-08	54.7001
							2.29277e-19	242.072	2.29277e-06	82.0732		2.29277e-13	128.269		2.29277e-13	148.878		2.29277e-12	113.046		2.29277e-10	45.3794		2.29277e-09	107.218		2.29277e-08	54.8402
							2.31401e-19	242.603	2.31401e-06	82.2984		2.31401e-13	128.598		2.31401e-13	149.209		2.31401e-12	113.357		2.31401e-10	45.5511		2.31401e-09	107.467		2.31401e-08	54.9807
							2.33544e-19	243.136	2.33544e-06	82.5243		2.33544e-13	128.929		2.33544e-13	149.541		2.33544e-12	113.669		2.33544e-10	45.7235		2.33544e-09	107.716		2.33544e-08	55.1216
							2.35707e-19	243.669	2.35707e-06	82.7508		2.35707e-13	129.261		2.35707e-13	149.873		2.35707e-12	113.981		2.35707e-10	45.8965		2.35707e-09	107.965		2.35707e-08	55.2628
							2.3789e-19	244.204	2.3789e-06	82.9779		2.3789e-13	129.593		2.3789e-13	150.207		2.3789e-12	114.294		2.3789e-10	46.0702		2.3789e-09	108.215		2.3789e-08	55.4044
							2.40093e-19	244.74	2.40093e-06	83.2057		2.40093e-13	129.926		2.40093e-13	150.541		2.40093e-12	114.608		2.40093e-10	46.2446		2.40093e-09	108.466		2.40093e-08	55.5463
							2.42317e-19	245.278	2.42317e-06	83.4341		2.42317e-13	130.261		2.42317e-13	150.876		2.42317e-12	114.923		2.42317e-10	46.4196		2.42317e-09	108.718		2.42317e-08	55.6886
							2.44562e-19	245.816	2.44562e-06	83.6631		2.44562e-13	130.596		2.44562e-13	151.211		2.44562e-12	115.239		2.44562e-10	46.5952		2.44562e-09	108.97		2.44562e-08	55.8312
							2.46827e-19	246.356	2.46827e-06	83.8927		2.46827e-13	130.932		2.46827e-13	151.548		2.46827e-12	115.556		2.46827e-10	46.7716		2.46827e-09	109.222		2.46827e-08	55.9743
							2.49113e-19	246.897	2.49113e-06	84.1229		2.49113e-13	131.268		2.49113e-13	151.885		2.49113e-12	115.873		2.49113e-10	46.9486		2.49113e-09	109.475		2.49113e-08	56.1177
							2.5142e-19	247.439	2.5142e-06	84.3538		2.5142e-13	131.606		2.5142e-13	152.223		2.5142e-12	116.192		2.5142e-10	47.1262		2.5142e-09	109.729		2.5142e-08	56.2614
							2.53749e-19	247.982	2.53749e-06	84.5854		2.53749e-13	131.944		2.53749e-13	152.561		2.53749e-12	116.511		2.53749e-10	47.3046		2.53749e-09	109.983		2.53749e-08	56.4056
							2.56099e-19	248.526	2.56099e-06	84.8175		2.56099e-13	132.284		2.56099e-13	152.9		2.56099e-12	116.832		2.56099e-10	47.4836		2.56099e-09	110.238		2.56099e-08	56.5501
							2.58471e-19	249.072	2.58471e-06	85.0503		2.58471e-13	132.624		2.58471e-13	153.241		2.58471e-12	117.153		2.58471e-10	47.6633		2.58471e-09	110.494		2.58471e-08	56.6949
							2.60865e-19	249.619	2.60865e-06	85.2838		2.60865e-13	132.965		2.60865e-13	153.581		2.60865e-12	117.475		2.60865e-10	47.8436		2.60865e-09	110.75		2.60865e-08	56.8402
							2.63282e-19	250.167	2.63282e-06	85.5178		2.63282e-13	133.307		2.63282e-13	153.923		2.63282e-12	117.797		2.63282e-10	48.0247		2.63282e-09	111.007		2.63282e-08	56.9858
							2.6572e-19	250.716	2.6572e-06	85.7525		2.6572e-13	133.65		2.6572e-13	154.265		2.6572e-12	118.121		2.6572e-10	48.2064		2.6572e-09	111.264		2.6572e-08	57.1318
							2.68181e-19	251.266	2.68181e-06	85.9879		2.68181e-13	133.993		2.68181e-13	154.609		2.68181e-12	118.446		2.68181e-10	48.3888		2.68181e-09	111.522		2.68181e-08	57.2782
							2.70665e-19	251.818	2.70665e-06	86.2239		2.70665e-13	134.338		2.70665e-13	154.952		2.70665e-12	118.771		2.70665e-10	48.572		2.70665e-09	111.78		2.70665e-08	57.4249
							2.73172e-19	252.371	2.73172e-06	86.4606		2.73172e-13	134.684		2.73172e-13	155.297		2.73172e-12	119.098		2.73172e-10	48.7558		2.73172e-09	112.039		2.73172e-08	57.572
							2.75702e-19	252.925	2.75702e-06	86.6979		2.75702e-13	135.03		2.75702e-13	155.642		2.75702e-12	119.425		2.75702e-10	48.9403		2.75702e-09	112.299		2.75702e-08	57.7195
							2.78256e-19	253.48	2.78256e-06	86.9358		2.78256e-13	135.377		2.78256e-13	155.989		2.78256e-12	119.753		2.78256e-10	49.1255		2.78256e-09	112.559		2.78256e-08	57.8674
							2.80833e-19	254.036	2.80833e-06	87.1744		2.80833e-13	135.725		2.80833e-13	156.336		2.80833e-12	120.083		2.80833e-10	49.3114		2.80833e-09	112.82		2.80833e-08	58.0156
							2.83434e-19	254.594	2.83434e-06	87.4137		2.83434e-13	136.074		2.83434e-13	156.683		2.83434e-12	120.413		2.83434e-10	49.498		2.83434e-09	113.081		2.83434e-08	58.1643
							2.8606e-19	255.153	2.8606e-06	87.6536		2.8606e-13	136.424		2.8606e-13	157.032		2.8606e-12	120.743		2.8606e-10	49.6853		2.8606e-09	113.344		2.8606e-08	58.3133
							2.88709e-19	255.713	2.88709e-06	87.8942		2.88709e-13	136.775		2.88709e-13	157.381		2.88709e-12	121.075		2.88709e-10	49.8733		2.88709e-09	113.606		2.88709e-08	58.4626
							2.91383e-19	256.274	2.91383e-06	88.1355		2.91383e-13	137.127		2.91383e-13	157.731		2.91383e-12	121.408		2.91383e-10	50.0621		2.91383e-09	113.87		2.91383e-08	58.6124
							2.94082e-19	256.837	2.94082e-06	88.3774		2.94082e-13	137.48		2.94082e-13	158.082		2.94082e-12	121.742		2.94082e-10	50.2515		2.94082e-09	114.133		2.94082e-08	58.7626
							2.96806e-19	257.401	2.96806e-06	88.6199		2.96806e-13	137.833		2.96806e-13	158.434		2.96806e-12	122.076		2.96806e-10	50.4417		2.96806e-09	114.398		2.96806e-08	58.9131
							2.99555e-19	257.966	2.99555e-06	88.8632		2.99555e-13	138.188		2.99555e-13	158.786		2.99555e-12	122.412		2.99555e-10	50.6326		2.99555e-09	114.663		2.99555e-08	59.064
							3.02329e-19	258.532	3.02329e-06	89.1071		3.02329e-13	138.543		3.02329e-13	159.139		3.02329e-12	122.748		3.02329e-10	50.8242		3.02329e-09	114.929		3.02329e-08	59.2154
							3.0513e-19	259.1	3.0513e-06	89.3516		3.0513e-13	138.899		3.0513e-13	159.493		3.0513e-12	123.086		3.0513e-10	51.0165		3.0513e-09	115.195		3.0513e-08	59.3671
							3.07956e-19	259.668	3.07956e-06	89.5969		3.07956e-13	139.257		3.07956e-13	159.848		3.07956e-12	123.424		3.07956e-10	51.2096		3.07956e-09	115.462		3.07956e-08	59.5191
							3.10808e-19	260.239	3.10808e-06	89.8428		3.10808e-13	139.615		3.10808e-13	160.204		3.10808e-12	123.763		3.10808e-10	51.4033		3.10808e-09	115.73		3.10808e-08	59.6716
							3.13687e-19	260.81	3.13687e-06	90.0894		3.13687e-13	139.974		3.13687e-13	160.56		3.13687e-12	124.103		3.13687e-10	51.5979		3.13687e-09	115.998		3.13687e-08	59.8245
							3.16592e-19	261.382	3.16592e-06	90.3366		3.16592e-13	140.334		3.16592e-13	160.917		3.16592e-12	124.444		3.16592e-10	51.7931		3.16592e-09	116.267		3.16592e-08	59.9778
							3.19525e-19	261.956	3.19525e-06	90.5846		3.19525e-13	140.695		3.19525e-13	161.275		3.19525e-12	124.786		3.19525e-10	51.9891		3.19525e-09	116.536		3.19525e-08	60.1314
							3.22484e-19	262.531	3.22484e-06	90.8332		3.22484e-13	141.057		3.22484e-13	161.634		3.22484e-12	125.129		3.22484e-10	52.1859		3.22484e-09	116.806		3.22484e-08	60.2855
							3.25471e-19	263.108	3.25471e-06	91.0825		3.25471e-13	141.419		3.25471e-13	161.993		3.25471e-12	125.473		3.25471e-10	52.3834		3.25471e-09	117.077		3.25471e-08	60.4399
							3.28486e-19	263.685	3.28486e-06	91.3325		3.28486e-13	141.783		3.28486e-13	162.353		3.28486e-12	125.818		3.28486e-10	52.5816		3.28486e-09	117.348		3.28486e-08	60.5947
							3.31528e-19	264.264	3.31528e-06	91.5832		3.31528e-13	142.148		3.31528e-13	162.715		3.31528e-12	126.164		3.31528e-10	52.7806		3.31528e-09	117.62		3.31528e-08	60.75
							3.34599e-19	264.844	3.34599e-06	91.8346		3.34599e-13	142.513		3.34599e-13	163.077		3.34599e-12	126.511		3.34599e-10	52.9803		3.34599e-09	117.893		3.34599e-08	60.9056
							3.37698e-19	265.426	3.37698e-06	92.0866		3.37698e-13	142.88		3.37698e-13	163.439		3.37698e-12	126.858		3.37698e-10	53.1808		3.37698e-09	118.166		3.37698e-08	61.0616
							3.40826e-19	266.008	3.40826e-06	92.3394		3.40826e-13	143.247		3.40826e-13	163.803		3.40826e-12	127.207		3.40826e-10	53.382		3.40826e-09	118.44		3.40826e-08	61.2181
							3.43983e-19	266.592	3.43983e-06	92.5928		3.43983e-13	143.616		3.43983e-13	164.167		3.43983e-12	127.557		3.43983e-10	53.5841		3.43983e-09	118.715		3.43983e-08	61.3749
							3.47169e-19	267.178	3.47169e-06	92.8469		3.47169e-13	143.985		3.47169e-13	164.532		3.47169e-12	127.907		3.47169e-10	53.7868		3.47169e-09	118.99		3.47169e-08	61.5321
							3.50384e-19	267.764	3.50384e-06	93.1018		3.50384e-13	144.355		3.50384e-13	164.898		3.50384e-12	128.259		3.50384e-10	53.9904		3.50384e-09	119.266		3.50384e-08	61.6898
							3.5363e-19	268.352	3.5363e-06	93.3573		3.5363e-13	144.727		3.5363e-13	165.265		3.5363e-12	128.611		3.5363e-10	54.1947		3.5363e-09	119.542		3.5363e-08	61.8478
							3.56905e-19	268.941	3.56905e-06	93.6135		3.56905e-13	145.099		3.56905e-13	165.633		3.56905e-12	128.965		3.56905e-10	54.3998		3.56905e-09	119.819		3.56905e-08	62.0063
							3.60211e-19	269.531	3.60211e-06	93.8705		3.60211e-13	145.472		3.60211e-13	166.001		3.60211e-12	129.319		3.60211e-10	54.6056		3.60211e-09	120.097		3.60211e-08	62.1651
							3.63547e-19	270.123	3.63547e-06	94.1281		3.63547e-13	145.846		3.63547e-13	166.37		3.63547e-12	129.675		3.63547e-10	54.8123		3.63547e-09	120.375		3.63547e-08	62.3244
							3.66914e-19	270.716	3.66914e-06	94.3865		3.66914e-13	146.221		3.66914e-13	166.74		3.66914e-12	130.031		3.66914e-10	55.0197		3.66914e-09	120.654		3.66914e-08	62.484
							3.70313e-19	271.31	3.70313e-06	94.6455		3.70313e-13	146.597		3.70313e-13	167.111		3.70313e-12	130.388		3.70313e-10	55.2279		3.70313e-09	120.934		3.70313e-08	62.6441
							3.73743e-19	271.906	3.73743e-06	94.9053		3.73743e-13	146.974		3.73743e-13	167.483		3.73743e-12	130.747		3.73743e-10	55.4369		3.73743e-09	121.214		3.73743e-08	62.8046
							3.77204e-19	272.503	3.77204e-06	95.1658		3.77204e-13	147.352		3.77204e-13	167.855		3.77204e-12	131.106		3.77204e-10	55.6467		3.77204e-09	121.495		3.77204e-08	62.9655
							3.80698e-19	273.101	3.80698e-06	95.427		3.80698e-13	147.731		3.80698e-13	168.229		3.80698e-12	131.466		3.80698e-10	55.8573		3.80698e-09	121.776		3.80698e-08	63.1268
							3.84224e-19	273.701	3.84224e-06	95.6889		3.84224e-13	148.111		3.84224e-13	168.603		3.84224e-12	131.828		3.84224e-10	56.0687		3.84224e-09	122.059		3.84224e-08	63.2885
							3.87783e-19	274.301	3.87783e-06	95.9515		3.87783e-13	148.492		3.87783e-13	168.978		3.87783e-12	132.19		3.87783e-10	56.2808		3.87783e-09	122.342		3.87783e-08	63.4506
							3.91375e-19	274.904	3.91375e-06	96.2149		3.91375e-13	148.874		3.91375e-13	169.354		3.91375e-12	132.553		3.91375e-10	56.4938		3.91375e-09	122.625		3.91375e-08	63.6132
							3.95e-19	275.507	3.95e-06	96.479		3.95e-13	149.257		3.95e-13	169.731		3.95e-12	132.918		3.95e-10	56.7076		3.95e-09	122.909		3.95e-08	63.7762
							3.98658e-19	276.112	3.98658e-06	96.7438		3.98658e-13	149.641		3.98658e-13	170.108		3.98658e-12	133.283		3.98658e-10	56.9222		3.98658e-09	123.194		3.98658e-08	63.9395
							4.02351e-19	276.718	4.02351e-06	97.0093		4.02351e-13	150.026		4.02351e-13	170.486		4.02351e-12	133.649		4.02351e-10	57.1376		4.02351e-09	123.48		4.02351e-08	64.1034
							4.06077e-19	277.326	4.06077e-06	97.2756		4.06077e-13	150.412		4.06077e-13	170.866		4.06077e-12	134.017		4.06077e-10	57.3538		4.06077e-09	123.766		4.06077e-08	64.2676
							4.09838e-19	277.934	4.09838e-06	97.5425		4.09838e-13	150.798		4.09838e-13	171.246		4.09838e-12	134.385		4.09838e-10	57.5709		4.09838e-09	124.053		4.09838e-08	64.4322
							4.13634e-19	278.545	4.13634e-06	97.8103		4.13634e-13	151.186		4.13634e-13	171.627		4.13634e-12	134.754		4.13634e-10	57.7887		4.13634e-09	124.34		4.13634e-08	64.5973
							4.17466e-19	279.156	4.17466e-06	98.0787		4.17466e-13	151.575		4.17466e-13	172.008		4.17466e-12	135.125		4.17466e-10	58.0074		4.17466e-09	124.628		4.17466e-08	64.7628
							4.21332e-19	279.769	4.21332e-06	98.3479		4.21332e-13	151.965		4.21332e-13	172.391		4.21332e-12	135.496		4.21332e-10	58.2269		4.21332e-09	124.917		4.21332e-08	64.9287
							4.25235e-19	280.383	4.25235e-06	98.6179		4.25235e-13	152.356		4.25235e-13	172.774		4.25235e-12	135.868		4.25235e-10	58.4473		4.25235e-09	125.207		4.25235e-08	65.095
							4.29173e-19	280.999	4.29173e-06	98.8885		4.29173e-13	152.747		4.29173e-13	173.159		4.29173e-12	136.242		4.29173e-10	58.6685		4.29173e-09	125.497		4.29173e-08	65.2618
							4.33148e-19	281.615	4.33148e-06	99.1599		4.33148e-13	153.14		4.33148e-13	173.544		4.33148e-12	136.616		4.33148e-10	58.8905		4.33148e-09	125.788		4.33148e-08	65.429
							4.3716e-19	282.234	4.3716e-06	99.4321		4.3716e-13	153.534		4.3716e-13	173.93		4.3716e-12	136.992		4.3716e-10	59.1133		4.3716e-09	126.079		4.3716e-08	65.5966
							4.41209e-19	282.853	4.41209e-06	99.705		4.41209e-13	153.929		4.41209e-13	174.317		4.41209e-12	137.368		4.41209e-10	59.337		4.41209e-09	126.372		4.41209e-08	65.7646
							4.45296e-19	283.474	4.45296e-06	99.9787		4.45296e-13	154.325		4.45296e-13	174.704		4.45296e-12	137.746		4.45296e-10	59.5616		4.45296e-09	126.664		4.45296e-08	65.9331
							4.4942e-19	284.097	4.4942e-06	100.253		4.4942e-13	154.722		4.4942e-13	175.093		4.4942e-12	138.124		4.4942e-10	59.787		4.4942e-09	126.958		4.4942e-08	66.102
							4.53583e-19	284.72	4.53583e-06	100.528		4.53583e-13	155.12		4.53583e-13	175.483		4.53583e-12	138.504		4.53583e-10	60.0132		4.53583e-09	127.252		4.53583e-08	66.2714
							4.57784e-19	285.345	4.57784e-06	100.804		4.57784e-13	155.519		4.57784e-13	175.873		4.57784e-12	138.885		4.57784e-10	60.2403		4.57784e-09	127.547		4.57784e-08	66.4411
							4.62024e-19	285.972	4.62024e-06	101.081		4.62024e-13	155.919		4.62024e-13	176.264		4.62024e-12	139.266		4.62024e-10	60.4683		4.62024e-09	127.843		4.62024e-08	66.6114
							4.66303e-19	286.599	4.66303e-06	101.358		4.66303e-13	156.32		4.66303e-13	176.656		4.66303e-12	139.649		4.66303e-10	60.6971		4.66303e-09	128.139		4.66303e-08	66.782
							4.70622e-19	287.229	4.70622e-06	101.636		4.70622e-13	156.722		4.70622e-13	177.049		4.70622e-12	140.033		4.70622e-10	60.9268		4.70622e-09	128.436		4.70622e-08	66.9531
							4.74981e-19	287.859	4.74981e-06	101.915		4.74981e-13	157.125		4.74981e-13	177.443		4.74981e-12	140.418		4.74981e-10	61.1574		4.74981e-09	128.734		4.74981e-08	67.1246
							4.79381e-19	288.491	4.79381e-06	102.195		4.79381e-13	157.529		4.79381e-13	177.838		4.79381e-12	140.804		4.79381e-10	61.3888		4.79381e-09	129.032		4.79381e-08	67.2966
							4.83821e-19	289.124	4.83821e-06	102.476		4.83821e-13	157.934		4.83821e-13	178.233		4.83821e-12	141.191		4.83821e-10	61.6211		4.83821e-09	129.331		4.83821e-08	67.469
							4.88302e-19	289.759	4.88302e-06	102.757		4.88302e-13	158.34		4.88302e-13	178.63		4.88302e-12	141.579		4.88302e-10	61.8543		4.88302e-09	129.631		4.88302e-08	67.6418
							4.92825e-19	290.395	4.92825e-06	103.039		4.92825e-13	158.747		4.92825e-13	179.027		4.92825e-12	141.968		4.92825e-10	62.0884		4.92825e-09	129.931		4.92825e-08	67.8151
							4.9739e-19	291.033	4.9739e-06	103.322		4.9739e-13	159.156		4.9739e-13	179.425		4.9739e-12	142.358		4.9739e-10	62.3234		4.9739e-09	130.232		4.9739e-08	67.9888
							5.01997e-19	291.672	5.01997e-06	103.605		5.01997e-13	159.565		5.01997e-13	179.824		5.01997e-12	142.749		5.01997e-10	62.5592		5.01997e-09	130.534		5.01997e-08	68.163
							5.06646e-19	292.312	5.06646e-06	103.89		5.06646e-13	159.975		5.06646e-13	180.224		5.06646e-12	143.142		5.06646e-10	62.796		5.06646e-09	130.837		5.06646e-08	68.3376
							5.11339e-19	292.954	5.11339e-06	104.175		5.11339e-13	160.387		5.11339e-13	180.625		5.11339e-12	143.535		5.11339e-10	63.0336		5.11339e-09	131.14		5.11339e-08	68.5127
							5.16075e-19	293.597	5.16075e-06	104.461		5.16075e-13	160.799		5.16075e-13	181.027		5.16075e-12	143.93		5.16075e-10	63.2721		5.16075e-09	131.444		5.16075e-08	68.6882
							5.20855e-19	294.241	5.20855e-06	104.747		5.20855e-13	161.213		5.20855e-13	181.429		5.20855e-12	144.325		5.20855e-10	63.5116		5.20855e-09	131.749		5.20855e-08	68.8642
							5.25679e-19	294.887	5.25679e-06	105.035		5.25679e-13	161.627		5.25679e-13	181.833		5.25679e-12	144.722		5.25679e-10	63.7519		5.25679e-09	132.054		5.25679e-08	69.0406
							5.30548e-19	295.535	5.30548e-06	105.323		5.30548e-13	162.043		5.30548e-13	182.237		5.30548e-12	145.12		5.30548e-10	63.9932		5.30548e-09	132.36		5.30548e-08	69.2175
							5.35462e-19	296.183	5.35462e-06	105.612		5.35462e-13	162.46		5.35462e-13	182.643		5.35462e-12	145.518		5.35462e-10	64.2353		5.35462e-09	132.667		5.35462e-08	69.3948
							5.40422e-19	296.834	5.40422e-06	105.902		5.40422e-13	162.878		5.40422e-13	183.049		5.40422e-12	145.918		5.40422e-10	64.4784		5.40422e-09	132.974		5.40422e-08	69.5726
							5.45427e-19	297.485	5.45427e-06	106.193		5.45427e-13	163.297		5.45427e-13	183.456		5.45427e-12	146.319		5.45427e-10	64.7224		5.45427e-09	133.282		5.45427e-08	69.7508
							5.50479e-19	298.138	5.50479e-06	106.484		5.50479e-13	163.717		5.50479e-13	183.864		5.50479e-12	146.722		5.50479e-10	64.9673		5.50479e-09	133.591		5.50479e-08	69.9295
							5.55578e-19	298.793	5.55578e-06	106.777		5.55578e-13	164.138		5.55578e-13	184.273		5.55578e-12	147.125		5.55578e-10	65.2132		5.55578e-09	133.901		5.55578e-08	70.1087
							5.60723e-19	299.449	5.60723e-06	107.07		5.60723e-13	164.56		5.60723e-13	184.683		5.60723e-12	147.529		5.60723e-10	65.46		5.60723e-09	134.211		5.60723e-08	70.2883
							5.65917e-19	300.106	5.65917e-06	107.364		5.65917e-13	164.983		5.65917e-13	185.094		5.65917e-12	147.935		5.65917e-10	65.7077		5.65917e-09	134.522		5.65917e-08	70.4684
							5.71159e-19	300.765	5.71159e-06	107.658		5.71159e-13	165.407		5.71159e-13	185.506		5.71159e-12	148.341		5.71159e-10	65.9564		5.71159e-09	134.834		5.71159e-08	70.6489
							5.76449e-19	301.425	5.76449e-06	107.954		5.76449e-13	165.833		5.76449e-13	185.918		5.76449e-12	148.749		5.76449e-10	66.206		5.76449e-09	135.147		5.76449e-08	70.8299
							5.81788e-19	302.087	5.81788e-06	108.25		5.81788e-13	166.259		5.81788e-13	186.332		5.81788e-12	149.158		5.81788e-10	66.4565		5.81788e-09	135.46		5.81788e-08	71.0113
							5.87177e-19	302.75	5.87177e-06	108.547		5.87177e-13	166.687		5.87177e-13	186.746		5.87177e-12	149.568		5.87177e-10	66.708		5.87177e-09	135.774		5.87177e-08	71.1932
							5.92615e-19	303.415	5.92615e-06	108.845		5.92615e-13	167.115		5.92615e-13	187.162		5.92615e-12	149.979		5.92615e-10	66.9604		5.92615e-09	136.088		5.92615e-08	71.3756
							5.98104e-19	304.081	5.98104e-06	109.144		5.98104e-13	167.545		5.98104e-13	187.578		5.98104e-12	150.391		5.98104e-10	67.2138		5.98104e-09	136.404		5.98104e-08	71.5585
							6.03644e-19	304.748	6.03644e-06	109.443		6.03644e-13	167.976		6.03644e-13	187.995		6.03644e-12	150.804		6.03644e-10	67.4682		6.03644e-09	136.72		6.03644e-08	71.7418
							6.09235e-19	305.417	6.09235e-06	109.744		6.09235e-13	168.408		6.09235e-13	188.413		6.09235e-12	151.219		6.09235e-10	67.7235		6.09235e-09	137.037		6.09235e-08	71.9256
							6.14878e-19	306.088	6.14878e-06	110.045		6.14878e-13	168.841		6.14878e-13	188.832		6.14878e-12	151.634		6.14878e-10	67.9798		6.14878e-09	137.354		6.14878e-08	72.1099
							6.20573e-19	306.76	6.20573e-06	110.347		6.20573e-13	169.275		6.20573e-13	189.252		6.20573e-12	152.051		6.20573e-10	68.237		6.20573e-09	137.673		6.20573e-08	72.2946
							6.26321e-19	307.433	6.26321e-06	110.65		6.26321e-13	169.711		6.26321e-13	189.673		6.26321e-12	152.469		6.26321e-10	68.4953		6.26321e-09	137.992		6.26321e-08	72.4798
							6.32122e-19	308.108	6.32122e-06	110.954		6.32122e-13	170.147		6.32122e-13	190.095		6.32122e-12	152.888		6.32122e-10	68.7545		6.32122e-09	138.312		6.32122e-08	72.6655
							6.37977e-19	308.784	6.37977e-06	111.258		6.37977e-13	170.585		6.37977e-13	190.518		6.37977e-12	153.308		6.37977e-10	69.0146		6.37977e-09	138.632		6.37977e-08	72.8516
							6.43886e-19	309.462	6.43886e-06	111.563		6.43886e-13	171.024		6.43886e-13	190.942		6.43886e-12	153.73		6.43886e-10	69.2758		6.43886e-09	138.953		6.43886e-08	73.0383
							6.4985e-19	310.142	6.4985e-06	111.87		6.4985e-13	171.463		6.4985e-13	191.366		6.4985e-12	154.152		6.4985e-10	69.538		6.4985e-09	139.276		6.4985e-08	73.2254
							6.55869e-19	310.823	6.55869e-06	112.177		6.55869e-13	171.904		6.55869e-13	191.792		6.55869e-12	154.576		6.55869e-10	69.8011		6.55869e-09	139.598		6.55869e-08	73.413
							6.61943e-19	311.505	6.61943e-06	112.485		6.61943e-13	172.347		6.61943e-13	192.219		6.61943e-12	155.001		6.61943e-10	70.0653		6.61943e-09	139.922		6.61943e-08	73.6011
							6.68074e-19	312.189	6.68074e-06	112.793		6.68074e-13	172.79		6.68074e-13	192.646		6.68074e-12	155.427		6.68074e-10	70.3304		6.68074e-09	140.246		6.68074e-08	73.7896
							6.74262e-19	312.874	6.74262e-06	113.103		6.74262e-13	173.234		6.74262e-13	193.075		6.74262e-12	155.854		6.74262e-10	70.5966		6.74262e-09	140.571		6.74262e-08	73.9787
							6.80507e-19	313.561	6.80507e-06	113.413		6.80507e-13	173.68		6.80507e-13	193.504		6.80507e-12	156.282		6.80507e-10	70.8637		6.80507e-09	140.897		6.80507e-08	74.1682
							6.8681e-19	314.249	6.8681e-06	113.725		6.8681e-13	174.126		6.8681e-13	193.935		6.8681e-12	156.712		6.8681e-10	71.1319		6.8681e-09	141.224		6.8681e-08	74.3582
							6.93172e-19	314.939	6.93172e-06	114.037		6.93172e-13	174.574		6.93172e-13	194.366		6.93172e-12	157.142		6.93172e-10	71.4011		6.93172e-09	141.551		6.93172e-08	74.5487
							6.99592e-19	315.631	6.99592e-06	114.35		6.99592e-13	175.023		6.99592e-13	194.798		6.99592e-12	157.574		6.99592e-10	71.6713		6.99592e-09	141.879		6.99592e-08	74.7396
							7.06072e-19	316.323	7.06072e-06	114.664		7.06072e-13	175.473		7.06072e-13	195.232		7.06072e-12	158.007		7.06072e-10	71.9425		7.06072e-09	142.208		7.06072e-08	74.9311
							7.12612e-19	317.018	7.12612e-06	114.978		7.12612e-13	175.925		7.12612e-13	195.666		7.12612e-12	158.442		7.12612e-10	72.2147		7.12612e-09	142.537		7.12612e-08	75.1231
							7.19212e-19	317.714	7.19212e-06	115.294		7.19212e-13	176.377		7.19212e-13	196.101		7.19212e-12	158.877		7.19212e-10	72.488		7.19212e-09	142.868		7.19212e-08	75.3155
							7.25873e-19	318.411	7.25873e-06	115.61		7.25873e-13	176.831		7.25873e-13	196.537		7.25873e-12	159.314		7.25873e-10	72.7623		7.25873e-09	143.199		7.25873e-08	75.5085
							7.32597e-19	319.11	7.32597e-06	115.928		7.32597e-13	177.285		7.32597e-13	196.974		7.32597e-12	159.752		7.32597e-10	73.0377		7.32597e-09	143.531		7.32597e-08	75.7019
							7.39382e-19	319.811	7.39382e-06	116.246		7.39382e-13	177.741		7.39382e-13	197.413		7.39382e-12	160.191		7.39382e-10	73.3141		7.39382e-09	143.863		7.39382e-08	75.8959
							7.4623e-19	320.513	7.4623e-06	116.565		7.4623e-13	178.198		7.4623e-13	197.852		7.4623e-12	160.631		7.4623e-10	73.5915		7.4623e-09	144.197		7.4623e-08	76.0903
							7.53142e-19	321.217	7.53142e-06	116.885		7.53142e-13	178.657		7.53142e-13	198.292		7.53142e-12	161.072		7.53142e-10	73.87		7.53142e-09	144.531		7.53142e-08	76.2852
							7.60118e-19	321.922	7.60118e-06	117.206		7.60118e-13	179.116		7.60118e-13	198.733		7.60118e-12	161.515		7.60118e-10	74.1496		7.60118e-09	144.866		7.60118e-08	76.4807
							7.67158e-19	322.628	7.67158e-06	117.527		7.67158e-13	179.577		7.67158e-13	199.175		7.67158e-12	161.959		7.67158e-10	74.4302		7.67158e-09	145.202		7.67158e-08	76.6766
							7.74264e-19	323.337	7.74264e-06	117.85		7.74264e-13	180.039		7.74264e-13	199.618		7.74264e-12	162.404		7.74264e-10	74.7118		7.74264e-09	145.538		7.74264e-08	76.873
							7.81435e-19	324.046	7.81435e-06	118.173		7.81435e-13	180.502		7.81435e-13	200.062		7.81435e-12	162.85		7.81435e-10	74.9946		7.81435e-09	145.875		7.81435e-08	77.07
							7.88673e-19	324.758	7.88673e-06	118.498		7.88673e-13	180.966		7.88673e-13	200.507		7.88673e-12	163.298		7.88673e-10	75.2784		7.88673e-09	146.214		7.88673e-08	77.2674
							7.95978e-19	325.471	7.95978e-06	118.823		7.95978e-13	181.431		7.95978e-13	200.953		7.95978e-12	163.747		7.95978e-10	75.5632		7.95978e-09	146.552		7.95978e-08	77.4654
							8.0335e-19	326.185	8.0335e-06	119.149		8.0335e-13	181.898		8.0335e-13	201.4		8.0335e-12	164.197		8.0335e-10	75.8492		8.0335e-09	146.892		8.0335e-08	77.6638
							8.10791e-19	326.901	8.10791e-06	119.476		8.10791e-13	182.366		8.10791e-13	201.848		8.10791e-12	164.648		8.10791e-10	76.1362		8.10791e-09	147.233		8.10791e-08	77.8628
							8.18301e-19	327.619	8.18301e-06	119.804		8.18301e-13	182.835		8.18301e-13	202.297		8.18301e-12	165.101		8.18301e-10	76.4243		8.18301e-09	147.574		8.18301e-08	78.0622
							8.2588e-19	328.338	8.2588e-06	120.133		8.2588e-13	183.305		8.2588e-13	202.747		8.2588e-12	165.554		8.2588e-10	76.7135		8.2588e-09	147.916		8.2588e-08	78.2622
							8.33529e-19	329.059	8.33529e-06	120.463		8.33529e-13	183.776		8.33529e-13	203.198		8.33529e-12	166.009		8.33529e-10	77.0038		8.33529e-09	148.259		8.33529e-08	78.4627
							8.4125e-19	329.781	8.4125e-06	120.793		8.4125e-13	184.249		8.4125e-13	203.65		8.4125e-12	166.466		8.4125e-10	77.2952		8.4125e-09	148.602		8.4125e-08	78.6637
							8.49042e-19	330.505	8.49042e-06	121.125		8.49042e-13	184.723		8.49042e-13	204.103		8.49042e-12	166.923		8.49042e-10	77.5878		8.49042e-09	148.947		8.49042e-08	78.8653
							8.56906e-19	331.231	8.56906e-06	121.457		8.56906e-13	185.198		8.56906e-13	204.557		8.56906e-12	167.382		8.56906e-10	77.8814		8.56906e-09	149.292		8.56906e-08	79.0673
							8.64842e-19	331.958	8.64842e-06	121.791		8.64842e-13	185.674		8.64842e-13	205.012		8.64842e-12	167.842		8.64842e-10	78.1761		8.64842e-09	149.638		8.64842e-08	79.2699
							8.72853e-19	332.687	8.72853e-06	122.125		8.72853e-13	186.152		8.72853e-13	205.468		8.72853e-12	168.303		8.72853e-10	78.4719		8.72853e-09	149.985		8.72853e-08	79.4729
							8.80937e-19	333.417	8.80937e-06	122.46		8.80937e-13	186.631		8.80937e-13	205.925		8.80937e-12	168.766		8.80937e-10	78.7689		8.80937e-09	150.332		8.80937e-08	79.6765
							8.89097e-19	334.149	8.89097e-06	122.796		8.89097e-13	187.111		8.89097e-13	206.383		8.89097e-12	169.23		8.89097e-10	79.067		8.89097e-09	150.681		8.89097e-08	79.8807
							8.97332e-19	334.883	8.97332e-06	123.133		8.97332e-13	187.592		8.97332e-13	206.842		8.97332e-12	169.695		8.97332e-10	79.3662		8.97332e-09	151.03		8.97332e-08	80.0853
							9.05643e-19	335.618	9.05643e-06	123.471		9.05643e-13	188.074		9.05643e-13	207.302		9.05643e-12	170.161		9.05643e-10	79.6665		9.05643e-09	151.38		9.05643e-08	80.2905
							9.14031e-19	336.355	9.14031e-06	123.81		9.14031e-13	188.558		9.14031e-13	207.763		9.14031e-12	170.629		9.14031e-10	79.968		9.14031e-09	151.731		9.14031e-08	80.4962
							9.22497e-19	337.093	9.22497e-06	124.15		9.22497e-13	189.043		9.22497e-13	208.225		9.22497e-12	171.098		9.22497e-10	80.2706		9.22497e-09	152.082		9.22497e-08	80.7024
							9.31041e-19	337.833	9.31041e-06	124.491		9.31041e-13	189.529		9.31041e-13	208.688		9.31041e-12	171.568		9.31041e-10	80.5744		9.31041e-09	152.435		9.31041e-08	80.9091
							9.39665e-19	338.575	9.39665e-06	124.832		9.39665e-13	190.017		9.39665e-13	209.152		9.39665e-12	172.04		9.39665e-10	80.8793		9.39665e-09	152.788		9.39665e-08	81.1164
							9.48368e-19	339.318	9.48368e-06	125.175		9.48368e-13	190.505		9.48368e-13	209.618		9.48368e-12	172.512		9.48368e-10	81.1854		9.48368e-09	153.142		9.48368e-08	81.3242
							9.57152e-19	340.063	9.57152e-06	125.518		9.57152e-13	190.995		9.57152e-13	210.084		9.57152e-12	172.987		9.57152e-10	81.4926		9.57152e-09	153.497		9.57152e-08	81.5325
							9.66017e-19	340.809	9.66017e-06	125.863		9.66017e-13	191.486		9.66017e-13	210.551		9.66017e-12	173.462		9.66017e-10	81.801		9.66017e-09	153.853		9.66017e-08	81.7414
							9.74965e-19	341.558	9.74965e-06	126.208		9.74965e-13	191.979		9.74965e-13	211.019		9.74965e-12	173.939		9.74965e-10	82.1105		9.74965e-09	154.209		9.74965e-08	81.9508
							9.83995e-19	342.307	9.83995e-06	126.555		9.83995e-13	192.473		9.83995e-13	211.489		9.83995e-12	174.417		9.83995e-10	82.4213		9.83995e-09	154.567		9.83995e-08	82.1608
							9.93109e-19	343.059	9.93109e-06	126.902		9.93109e-13	192.968		9.93109e-13	211.959		9.93109e-12	174.896		9.93109e-10	82.7332		9.93109e-09	154.925		9.93109e-08	82.3713
							1.00231e-18	343.812	1.00231e-05	127.25		1.00231e-12	193.464		1.00231e-12	212.431		1.00231e-11	175.377		1.00231e-09	83.0463		1.00231e-08	155.284		1.00231e-07	82.5823
							1.01159e-18	344.567	1.01159e-05	127.6		1.01159e-12	193.961		1.01159e-12	212.903		1.01159e-11	175.859		1.01159e-09	83.3605		1.01159e-08	155.644		1.01159e-07	82.7938
							1.02096e-18	345.323	1.02096e-05	127.95		1.02096e-12	194.46		1.02096e-12	213.377		1.02096e-11	176.342		1.02096e-09	83.676		1.02096e-08	156.005		1.02096e-07	83.0059
							1.03042e-18	346.081	1.03042e-05	128.301		1.03042e-12	194.96		1.03042e-12	213.851		1.03042e-11	176.827		1.03042e-09	83.9926		1.03042e-08	156.366		1.03042e-07	83.2186
							1.03996e-18	346.841	1.03996e-05	128.653		1.03996e-12	195.462		1.03996e-12	214.327		1.03996e-11	177.313		1.03996e-09	84.3105		1.03996e-08	156.729		1.03996e-07	83.4318
							1.04959e-18	347.602	1.04959e-05	129.006		1.04959e-12	195.964		1.04959e-12	214.804		1.04959e-11	177.8		1.04959e-09	84.6295		1.04959e-08	157.092		1.04959e-07	83.6455
							1.05931e-18	348.365	1.05931e-05	129.36		1.05931e-12	196.468		1.05931e-12	215.281		1.05931e-11	178.289		1.05931e-09	84.9498		1.05931e-08	157.456		1.05931e-07	83.8598
							1.06913e-18	349.13	1.06913e-05	129.716		1.06913e-12	196.974		1.06913e-12	215.76		1.06913e-11	178.779		1.06913e-09	85.2713		1.06913e-08	157.821		1.06913e-07	84.0746
							1.07903e-18	349.897	1.07903e-05	130.072		1.07903e-12	197.48		1.07903e-12	216.24		1.07903e-11	179.27		1.07903e-09	85.594		1.07903e-08	158.187		1.07903e-07	84.29
							1.08902e-18	350.665	1.08902e-05	130.429		1.08902e-12	197.988		1.08902e-12	216.721		1.08902e-11	179.763		1.08902e-09	85.9179		1.08902e-08	158.553		1.08902e-07	84.506
							1.09911e-18	351.435	1.09911e-05	130.787		1.09911e-12	198.497		1.09911e-12	217.203		1.09911e-11	180.257		1.09911e-09	86.243		1.09911e-08	158.921		1.09911e-07	84.7225
							1.10929e-18	352.206	1.10929e-05	131.145		1.10929e-12	199.008		1.10929e-12	217.686		1.10929e-11	180.752		1.10929e-09	86.5694		1.10929e-08	159.289		1.10929e-07	84.9395
							1.11956e-18	352.979	1.11956e-05	131.505		1.11956e-12	199.52		1.11956e-12	218.171		1.11956e-11	181.249		1.11956e-09	86.897		1.11956e-08	159.658		1.11956e-07	85.1571
							1.12993e-18	353.754	1.12993e-05	131.866		1.12993e-12	200.033		1.12993e-12	218.656		1.12993e-11	181.747		1.12993e-09	87.2258		1.12993e-08	160.028		1.12993e-07	85.3753
							1.1404e-18	354.531	1.1404e-05	132.228		1.1404e-12	200.547		1.1404e-12	219.142		1.1404e-11	182.247		1.1404e-09	87.5559		1.1404e-08	160.399		1.1404e-07	85.594
							1.15096e-18	355.309	1.15096e-05	132.591		1.15096e-12	201.063		1.15096e-12	219.63		1.15096e-11	182.748		1.15096e-09	87.8872		1.15096e-08	160.771		1.15096e-07	85.8133
							1.16162e-18	356.089	1.16162e-05	132.955		1.16162e-12	201.58		1.16162e-12	220.118		1.16162e-11	183.25		1.16162e-09	88.2198		1.16162e-08	161.144		1.16162e-07	86.0331
							1.17238e-18	356.871	1.17238e-05	133.32		1.17238e-12	202.099		1.17238e-12	220.608		1.17238e-11	183.754		1.17238e-09	88.5537		1.17238e-08	161.517		1.17238e-07	86.2535
							1.18324e-18	357.654	1.18324e-05	133.686		1.18324e-12	202.618		1.18324e-12	221.098		1.18324e-11	184.259		1.18324e-09	88.8888		1.18324e-08	161.891		1.18324e-07	86.4745
							1.1942e-18	358.439	1.1942e-05	134.053		1.1942e-12	203.139		1.1942e-12	221.59		1.1942e-11	184.765		1.1942e-09	89.2252		1.1942e-08	162.267		1.1942e-07	86.696
							1.20526e-18	359.226	1.20526e-05	134.421		1.20526e-12	203.662		1.20526e-12	222.083		1.20526e-11	185.273		1.20526e-09	89.5628		1.20526e-08	162.643		1.20526e-07	86.9181
							1.21642e-18	360.015	1.21642e-05	134.79		1.21642e-12	204.186		1.21642e-12	222.577		1.21642e-11	185.782		1.21642e-09	89.9017		1.21642e-08	163.02		1.21642e-07	87.1408
							1.22769e-18	360.805	1.22769e-05	135.16		1.22769e-12	204.711		1.22769e-12	223.072		1.22769e-11	186.293		1.22769e-09	90.242		1.22769e-08	163.397		1.22769e-07	87.364
							1.23906e-18	361.597	1.23906e-05	135.531		1.23906e-12	205.237		1.23906e-12	223.568		1.23906e-11	186.805		1.23906e-09	90.5835		1.23906e-08	163.776		1.23906e-07	87.5878
							1.25054e-18	362.391	1.25054e-05	135.903		1.25054e-12	205.765		1.25054e-12	224.066		1.25054e-11	187.318		1.25054e-09	90.9262		1.25054e-08	164.156		1.25054e-07	87.8122
							1.26212e-18	363.187	1.26212e-05	136.276		1.26212e-12	206.294		1.26212e-12	224.564		1.26212e-11	187.833		1.26212e-09	91.2703		1.26212e-08	164.536		1.26212e-07	88.0372
							1.27381e-18	363.984	1.27381e-05	136.65		1.27381e-12	206.825		1.27381e-12	225.064		1.27381e-11	188.349		1.27381e-09	91.6157		1.27381e-08	164.918		1.27381e-07	88.2627
							1.28561e-18	364.783	1.28561e-05	137.025		1.28561e-12	207.357		1.28561e-12	225.564		1.28561e-11	188.867		1.28561e-09	91.9624		1.28561e-08	165.3		1.28561e-07	88.4888
							1.29752e-18	365.584	1.29752e-05	137.401		1.29752e-12	207.89		1.29752e-12	226.066		1.29752e-11	189.386		1.29752e-09	92.3104		1.29752e-08	165.683		1.29752e-07	88.7155
							1.30954e-18	366.386	1.30954e-05	137.778		1.30954e-12	208.425		1.30954e-12	226.569		1.30954e-11	189.906		1.30954e-09	92.6598		1.30954e-08	166.067		1.30954e-07	88.9428
							1.32166e-18	367.191	1.32166e-05	138.156		1.32166e-12	208.961		1.32166e-12	227.073		1.32166e-11	190.428		1.32166e-09	93.0104		1.32166e-08	166.452		1.32166e-07	89.1707
							1.33391e-18	367.997	1.33391e-05	138.535		1.33391e-12	209.498		1.33391e-12	227.578		1.33391e-11	190.952		1.33391e-09	93.3624		1.33391e-08	166.838		1.33391e-07	89.3991
							1.34626e-18	368.805	1.34626e-05	138.916		1.34626e-12	210.037		1.34626e-12	228.084		1.34626e-11	191.477		1.34626e-09	93.7157		1.34626e-08	167.224		1.34626e-07	89.6281
							1.35873e-18	369.614	1.35873e-05	139.297		1.35873e-12	210.577		1.35873e-12	228.591		1.35873e-11	192.003		1.35873e-09	94.0703		1.35873e-08	167.612		1.35873e-07	89.8577
							1.37131e-18	370.426	1.37131e-05	139.679		1.37131e-12	211.119		1.37131e-12	229.1		1.37131e-11	192.531		1.37131e-09	94.4263		1.37131e-08	168		1.37131e-07	90.088
							1.38402e-18	371.239	1.38402e-05	140.063		1.38402e-12	211.662		1.38402e-12	229.609		1.38402e-11	193.06		1.38402e-09	94.7837		1.38402e-08	168.39		1.38402e-07	90.3187
							1.39684e-18	372.054	1.39684e-05	140.447		1.39684e-12	212.206		1.39684e-12	230.12		1.39684e-11	193.59		1.39684e-09	95.1423		1.39684e-08	168.78		1.39684e-07	90.5501
							1.40977e-18	372.871	1.40977e-05	140.832		1.40977e-12	212.752		1.40977e-12	230.632		1.40977e-11	194.122		1.40977e-09	95.5024		1.40977e-08	169.171		1.40977e-07	90.7821
							1.42283e-18	373.689	1.42283e-05	141.219		1.42283e-12	213.299		1.42283e-12	231.145		1.42283e-11	194.656		1.42283e-09	95.8638		1.42283e-08	169.563		1.42283e-07	91.0147
							1.43601e-18	374.51	1.43601e-05	141.607		1.43601e-12	213.848		1.43601e-12	231.659		1.43601e-11	195.191		1.43601e-09	96.2266		1.43601e-08	169.956		1.43601e-07	91.2478
							1.44931e-18	375.332	1.44931e-05	141.995		1.44931e-12	214.398		1.44931e-12	232.174		1.44931e-11	195.727		1.44931e-09	96.5907		1.44931e-08	170.35		1.44931e-07	91.4816
							1.46273e-18	376.156	1.46273e-05	142.385		1.46273e-12	214.949		1.46273e-12	232.691		1.46273e-11	196.265		1.46273e-09	96.9562		1.46273e-08	170.745		1.46273e-07	91.716
							1.47628e-18	376.981	1.47628e-05	142.776		1.47628e-12	215.502		1.47628e-12	233.208		1.47628e-11	196.805		1.47628e-09	97.3232		1.47628e-08	171.14		1.47628e-07	91.9509
							1.48996e-18	377.809	1.48996e-05	143.168		1.48996e-12	216.056		1.48996e-12	233.727		1.48996e-11	197.346		1.48996e-09	97.6914		1.48996e-08	171.537		1.48996e-07	92.1865
							1.50376e-18	378.638	1.50376e-05	143.561		1.50376e-12	216.612		1.50376e-12	234.247		1.50376e-11	197.888		1.50376e-09	98.0611		1.50376e-08	171.935		1.50376e-07	92.4227
							1.51768e-18	379.47	1.51768e-05	143.955		1.51768e-12	217.169		1.51768e-12	234.768		1.51768e-11	198.432		1.51768e-09	98.4322		1.51768e-08	172.333		1.51768e-07	92.6594
							1.53174e-18	380.303	1.53174e-05	144.35		1.53174e-12	217.727		1.53174e-12	235.29		1.53174e-11	198.977		1.53174e-09	98.8047		1.53174e-08	172.733		1.53174e-07	92.8968
							1.54593e-18	381.138	1.54593e-05	144.746		1.54593e-12	218.287		1.54593e-12	235.813		1.54593e-11	199.524		1.54593e-09	99.1786		1.54593e-08	173.133		1.54593e-07	93.1348
							1.56025e-18	381.974	1.56025e-05	145.143		1.56025e-12	218.849		1.56025e-12	236.338		1.56025e-11	200.072		1.56025e-09	99.5539		1.56025e-08	173.534		1.56025e-07	93.3734
							1.5747e-18	382.813	1.5747e-05	145.542		1.5747e-12	219.411		1.5747e-12	236.864		1.5747e-11	200.622		1.5747e-09	99.9307		1.5747e-08	173.936		1.5747e-07	93.6126
							1.58928e-18	383.653	1.58928e-05	145.941		1.58928e-12	219.976		1.58928e-12	237.39		1.58928e-11	201.174		1.58928e-09	100.309		1.58928e-08	174.339		1.58928e-07	93.8524
							1.604e-18	384.495	1.604e-05	146.342		1.604e-12	220.541		1.604e-12	237.918		1.604e-11	201.727		1.604e-09	100.688		1.604e-08	174.744		1.604e-07	94.0928
							1.61886e-18	385.34	1.61886e-05	146.743		1.61886e-12	221.109		1.61886e-12	238.448		1.61886e-11	202.281		1.61886e-09	101.069		1.61886e-08	175.149		1.61886e-07	94.3339
							1.63385e-18	386.185	1.63385e-05	147.146		1.63385e-12	221.677		1.63385e-12	238.978		1.63385e-11	202.837		1.63385e-09	101.452		1.63385e-08	175.554		1.63385e-07	94.5756
							1.64899e-18	387.033	1.64899e-05	147.55		1.64899e-12	222.247		1.64899e-12	239.51		1.64899e-11	203.394		1.64899e-09	101.836		1.64899e-08	175.961		1.64899e-07	94.8179
							1.66426e-18	387.883	1.66426e-05	147.955		1.66426e-12	222.819		1.66426e-12	240.042		1.66426e-11	203.953		1.66426e-09	102.221		1.66426e-08	176.369		1.66426e-07	95.0608
							1.67967e-18	388.734	1.67967e-05	148.361		1.67967e-12	223.392		1.67967e-12	240.576		1.67967e-11	204.514		1.67967e-09	102.608		1.67967e-08	176.778		1.67967e-07	95.3043
							1.69523e-18	389.588	1.69523e-05	148.768		1.69523e-12	223.967		1.69523e-12	241.111		1.69523e-11	205.076		1.69523e-09	102.996		1.69523e-08	177.188		1.69523e-07	95.5485
							1.71093e-18	390.443	1.71093e-05	149.177		1.71093e-12	224.543		1.71093e-12	241.648		1.71093e-11	205.64		1.71093e-09	103.386		1.71093e-08	177.598		1.71093e-07	95.7932
							1.72678e-18	391.3	1.72678e-05	149.586		1.72678e-12	225.12		1.72678e-12	242.185		1.72678e-11	206.205		1.72678e-09	103.777		1.72678e-08	178.01		1.72678e-07	96.0387
							1.74277e-18	392.159	1.74277e-05	149.997		1.74277e-12	225.699		1.74277e-12	242.724		1.74277e-11	206.772		1.74277e-09	104.17		1.74277e-08	178.422		1.74277e-07	96.2847
							1.75892e-18	393.02	1.75892e-05	150.408		1.75892e-12	226.28		1.75892e-12	243.264		1.75892e-11	207.34		1.75892e-09	104.564		1.75892e-08	178.836		1.75892e-07	96.5314
							1.77521e-18	393.883	1.77521e-05	150.821		1.77521e-12	226.861		1.77521e-12	243.805		1.77521e-11	207.91		1.77521e-09	104.96		1.77521e-08	179.25		1.77521e-07	96.7786
							1.79165e-18	394.748	1.79165e-05	151.235		1.79165e-12	227.445		1.79165e-12	244.347		1.79165e-11	208.481		1.79165e-09	105.357		1.79165e-08	179.666		1.79165e-07	97.0266
							1.80824e-18	395.614	1.80824e-05	151.65		1.80824e-12	228.03		1.80824e-12	244.891		1.80824e-11	209.054		1.80824e-09	105.756		1.80824e-08	180.082		1.80824e-07	97.2751
							1.82499e-18	396.483	1.82499e-05	152.066		1.82499e-12	228.616		1.82499e-12	245.435		1.82499e-11	209.629		1.82499e-09	106.156		1.82499e-08	180.5		1.82499e-07	97.5243
							1.8419e-18	397.353	1.8419e-05	152.484		1.8419e-12	229.204		1.8419e-12	245.981		1.8419e-11	210.205		1.8419e-09	106.558		1.8419e-08	180.918		1.8419e-07	97.7742
							1.85896e-18	398.225	1.85896e-05	152.902		1.85896e-12	229.794		1.85896e-12	246.528		1.85896e-11	210.783		1.85896e-09	106.961		1.85896e-08	181.337		1.85896e-07	98.0247
							1.87617e-18	399.1	1.87617e-05	153.322		1.87617e-12	230.385		1.87617e-12	247.077		1.87617e-11	211.362		1.87617e-09	107.366		1.87617e-08	181.758		1.87617e-07	98.2758
							1.89355e-18	399.976	1.89355e-05	153.743		1.89355e-12	230.977		1.89355e-12	247.626		1.89355e-11	211.943		1.89355e-09	107.772		1.89355e-08	182.179		1.89355e-07	98.5276
							1.91109e-18	400.854	1.91109e-05	154.165		1.91109e-12	231.571		1.91109e-12	248.177		1.91109e-11	212.525		1.91109e-09	108.18		1.91109e-08	182.601		1.91109e-07	98.78
							1.92879e-18	401.734	1.92879e-05	154.588		1.92879e-12	232.167		1.92879e-12	248.729		1.92879e-11	213.109		1.92879e-09	108.589		1.92879e-08	183.024		1.92879e-07	99.033
							1.94666e-18	402.616	1.94666e-05	155.012		1.94666e-12	232.764		1.94666e-12	249.282		1.94666e-11	213.695		1.94666e-09	109		1.94666e-08	183.448		1.94666e-07	99.2867
							1.96469e-18	403.5	1.96469e-05	155.438		1.96469e-12	233.363		1.96469e-12	249.837		1.96469e-11	214.282		1.96469e-09	109.413		1.96469e-08	183.874		1.96469e-07	99.5411
							1.98288e-18	404.385	1.98288e-05	155.864		1.98288e-12	233.963		1.98288e-12	250.393		1.98288e-11	214.871		1.98288e-09	109.827		1.98288e-08	184.3		1.98288e-07	99.7961
							2.00125e-18	405.273	2.00125e-05	156.292		2.00125e-12	234.564		2.00125e-12	250.949		2.00125e-11	215.462		2.00125e-09	110.242		2.00125e-08	184.727		2.00125e-07	100.052
							2.01979e-18	406.163	2.01979e-05	156.721		2.01979e-12	235.168		2.01979e-12	251.508		2.01979e-11	216.054		2.01979e-09	110.66		2.01979e-08	185.155		2.01979e-07	100.308
							2.03849e-18	407.054	2.03849e-05	157.151		2.03849e-12	235.773		2.03849e-12	252.067		2.03849e-11	216.648		2.03849e-09	111.078		2.03849e-08	185.584		2.03849e-07	100.565
							2.05737e-18	407.948	2.05737e-05	157.582		2.05737e-12	236.379		2.05737e-12	252.628		2.05737e-11	217.243		2.05737e-09	111.499		2.05737e-08	186.014		2.05737e-07	100.823
							2.07643e-18	408.844	2.07643e-05	158.015		2.07643e-12	236.987		2.07643e-12	253.19		2.07643e-11	217.84		2.07643e-09	111.921		2.07643e-08	186.445		2.07643e-07	101.081
							2.09566e-18	409.741	2.09566e-05	158.449		2.09566e-12	237.596		2.09566e-12	253.753		2.09566e-11	218.439		2.09566e-09	112.344		2.09566e-08	186.877		2.09566e-07	101.34
							2.11507e-18	410.641	2.11507e-05	158.883		2.11507e-12	238.207		2.11507e-12	254.317		2.11507e-11	219.039		2.11507e-09	112.769		2.11507e-08	187.311		2.11507e-07	101.6
							2.13466e-18	411.542	2.13466e-05	159.32		2.13466e-12	238.82		2.13466e-12	254.883		2.13466e-11	219.641		2.13466e-09	113.196		2.13466e-08	187.745		2.13466e-07	101.86
							2.15443e-18	412.446	2.15443e-05	159.757		2.15443e-12	239.434		2.15443e-12	255.45		2.15443e-11	220.245		2.15443e-09	113.624		2.15443e-08	188.18		2.15443e-07	102.121
							2.17439e-18	413.351	2.17439e-05	160.195		2.17439e-12	240.05		2.17439e-12	256.018		2.17439e-11	220.85		2.17439e-09	114.054		2.17439e-08	188.616		2.17439e-07	102.382
							2.19453e-18	414.258	2.19453e-05	160.635		2.19453e-12	240.667		2.19453e-12	256.588		2.19453e-11	221.457		2.19453e-09	114.486		2.19453e-08	189.053		2.19453e-07	102.645
							2.21486e-18	415.168	2.21486e-05	161.076		2.21486e-12	241.286		2.21486e-12	257.158		2.21486e-11	222.066		2.21486e-09	114.919		2.21486e-08	189.491		2.21486e-07	102.908
							2.23537e-18	416.079	2.23537e-05	161.518		2.23537e-12	241.907		2.23537e-12	257.73		2.23537e-11	222.676		2.23537e-09	115.354		2.23537e-08	189.93		2.23537e-07	103.171
							2.25607e-18	416.993	2.25607e-05	161.961		2.25607e-12	242.529		2.25607e-12	258.303		2.25607e-11	223.288		2.25607e-09	115.791		2.25607e-08	190.371		2.25607e-07	103.436
							2.27697e-18	417.908	2.27697e-05	162.406		2.27697e-12	243.153		2.27697e-12	258.878		2.27697e-11	223.902		2.27697e-09	116.229		2.27697e-08	190.812		2.27697e-07	103.701
							2.29806e-18	418.826	2.29806e-05	162.852		2.29806e-12	243.778		2.29806e-12	259.454		2.29806e-11	224.517		2.29806e-09	116.669		2.29806e-08	191.254		2.29806e-07	103.966
							2.31935e-18	419.745	2.31935e-05	163.299		2.31935e-12	244.405		2.31935e-12	260.031		2.31935e-11	225.135		2.31935e-09	117.11		2.31935e-08	191.697		2.31935e-07	104.233
							2.34083e-18	420.666	2.34083e-05	163.747		2.34083e-12	245.034		2.34083e-12	260.609		2.34083e-11	225.753		2.34083e-09	117.553		2.34083e-08	192.142		2.34083e-07	104.5
							2.36251e-18	421.59	2.36251e-05	164.196		2.36251e-12	245.664		2.36251e-12	261.189		2.36251e-11	226.374		2.36251e-09	117.998		2.36251e-08	192.587		2.36251e-07	104.767
							2.38439e-18	422.515	2.38439e-05	164.647		2.38439e-12	246.296		2.38439e-12	261.77		2.38439e-11	226.996		2.38439e-09	118.445		2.38439e-08	193.033		2.38439e-07	105.036
							2.40648e-18	423.443	2.40648e-05	165.099		2.40648e-12	246.929		2.40648e-12	262.352		2.40648e-11	227.62		2.40648e-09	118.893		2.40648e-08	193.481		2.40648e-07	105.305
							2.42876e-18	424.373	2.42876e-05	165.552		2.42876e-12	247.564		2.42876e-12	262.936		2.42876e-11	228.245		2.42876e-09	119.343		2.42876e-08	193.929		2.42876e-07	105.575
							2.45126e-18	425.304	2.45126e-05	166.006		2.45126e-12	248.201		2.45126e-12	263.521		2.45126e-11	228.873		2.45126e-09	119.795		2.45126e-08	194.378		2.45126e-07	105.845
							2.47396e-18	426.238	2.47396e-05	166.462		2.47396e-12	248.839		2.47396e-12	264.107		2.47396e-11	229.502		2.47396e-09	120.248		2.47396e-08	194.829		2.47396e-07	106.116
							2.49688e-18	427.174	2.49688e-05	166.919		2.49688e-12	249.479		2.49688e-12	264.694		2.49688e-11	230.132		2.49688e-09	120.703		2.49688e-08	195.281		2.49688e-07	106.388
							2.52e-18	428.111	2.52e-05	167.377		2.52e-12	250.121		2.52e-12	265.283		2.52e-11	230.765		2.52e-09	121.16		2.52e-08	195.733		2.52e-07	106.661
							2.54335e-18	429.051	2.54335e-05	167.836		2.54335e-12	250.764		2.54335e-12	265.873		2.54335e-11	231.399		2.54335e-09	121.618		2.54335e-08	196.187		2.54335e-07	106.934
							2.5669e-18	429.993	2.5669e-05	168.297		2.5669e-12	251.409		2.5669e-12	266.464		2.5669e-11	232.035		2.5669e-09	122.078		2.5669e-08	196.641		2.5669e-07	107.208
							2.59068e-18	430.937	2.59068e-05	168.759		2.59068e-12	252.056		2.59068e-12	267.057		2.59068e-11	232.673		2.59068e-09	122.54		2.59068e-08	197.097		2.59068e-07	107.482
							2.61467e-18	431.883	2.61467e-05	169.222		2.61467e-12	252.704		2.61467e-12	267.651		2.61467e-11	233.312		2.61467e-09	123.004		2.61467e-08	197.554		2.61467e-07	107.758
							2.63889e-18	432.831	2.63889e-05	169.687		2.63889e-12	253.354		2.63889e-12	268.246		2.63889e-11	233.954		2.63889e-09	123.47		2.63889e-08	198.012		2.63889e-07	108.034
							2.66333e-18	433.781	2.66333e-05	170.152		2.66333e-12	254.005		2.66333e-12	268.843		2.66333e-11	234.597		2.66333e-09	123.937		2.66333e-08	198.471		2.66333e-07	108.311
							2.688e-18	434.734	2.688e-05	170.619		2.688e-12	254.658		2.688e-12	269.441		2.688e-11	235.241		2.688e-09	124.406		2.688e-08	198.931		2.688e-07	108.588
							2.7129e-18	435.688	2.7129e-05	171.088		2.7129e-12	255.313		2.7129e-12	270.04		2.7129e-11	235.888		2.7129e-09	124.877		2.7129e-08	199.392		2.7129e-07	108.866
							2.73803e-18	436.644	2.73803e-05	171.557		2.73803e-12	255.97		2.73803e-12	270.641		2.73803e-11	236.536		2.73803e-09	125.349		2.73803e-08	199.854		2.73803e-07	109.145
							2.76339e-18	437.603	2.76339e-05	172.028		2.76339e-12	256.628		2.76339e-12	271.243		2.76339e-11	237.186		2.76339e-09	125.824		2.76339e-08	200.317		2.76339e-07	109.425
							2.78898e-18	438.564	2.78898e-05	172.5		2.78898e-12	257.288		2.78898e-12	271.846		2.78898e-11	237.838		2.78898e-09	126.3		2.78898e-08	200.781		2.78898e-07	109.705
							2.81481e-18	439.526	2.81481e-05	172.974		2.81481e-12	257.95		2.81481e-12	272.451		2.81481e-11	238.492		2.81481e-09	126.778		2.81481e-08	201.247		2.81481e-07	109.986
							2.84088e-18	440.491	2.84088e-05	173.448		2.84088e-12	258.613		2.84088e-12	273.057		2.84088e-11	239.147		2.84088e-09	127.257		2.84088e-08	201.713		2.84088e-07	110.268
							2.8672e-18	441.458	2.8672e-05	173.925		2.8672e-12	259.279		2.8672e-12	273.664		2.8672e-11	239.805		2.8672e-09	127.739		2.8672e-08	202.181		2.8672e-07	110.55
							2.89375e-18	442.427	2.89375e-05	174.402		2.89375e-12	259.945		2.89375e-12	274.273		2.89375e-11	240.464		2.89375e-09	128.222		2.89375e-08	202.649		2.89375e-07	110.834
							2.92056e-18	443.399	2.92056e-05	174.881		2.92056e-12	260.614		2.92056e-12	274.883		2.92056e-11	241.125		2.92056e-09	128.708		2.92056e-08	203.119		2.92056e-07	111.118
							2.94761e-18	444.372	2.94761e-05	175.361		2.94761e-12	261.284		2.94761e-12	275.495		2.94761e-11	241.787		2.94761e-09	129.195		2.94761e-08	203.59		2.94761e-07	111.402
							2.97491e-18	445.348	2.97491e-05	175.842		2.97491e-12	261.956		2.97491e-12	276.107		2.97491e-11	242.452		2.97491e-09	129.684		2.97491e-08	204.061		2.97491e-07	111.688
							3.00246e-18	446.325	3.00246e-05	176.324		3.00246e-12	262.63		3.00246e-12	276.721		3.00246e-11	243.118		3.00246e-09	130.174		3.00246e-08	204.534		3.00246e-07	111.974
							3.03027e-18	447.305	3.03027e-05	176.808		3.03027e-12	263.305		3.03027e-12	277.337		3.03027e-11	243.786		3.03027e-09	130.667		3.03027e-08	205.008		3.03027e-07	112.261
							3.05834e-18	448.287	3.05834e-05	177.294		3.05834e-12	263.983		3.05834e-12	277.954		3.05834e-11	244.456		3.05834e-09	131.162		3.05834e-08	205.484		3.05834e-07	112.548
							3.08666e-18	449.271	3.08666e-05	177.78		3.08666e-12	264.661		3.08666e-12	278.572		3.08666e-11	245.128		3.08666e-09	131.658		3.08666e-08	205.96		3.08666e-07	112.837
							3.11525e-18	450.257	3.11525e-05	178.268		3.11525e-12	265.342		3.11525e-12	279.192		3.11525e-11	245.802		3.11525e-09	132.156		3.11525e-08	206.437		3.11525e-07	113.126
							3.14411e-18	451.246	3.14411e-05	178.758		3.14411e-12	266.025		3.14411e-12	279.813		3.14411e-11	246.478		3.14411e-09	132.656		3.14411e-08	206.916		3.14411e-07	113.415
							3.17323e-18	452.237	3.17323e-05	179.248		3.17323e-12	266.709		3.17323e-12	280.435		3.17323e-11	247.155		3.17323e-09	133.158		3.17323e-08	207.395		3.17323e-07	113.706
							3.20262e-18	453.229	3.20262e-05	179.74		3.20262e-12	267.395		3.20262e-12	281.059		3.20262e-11	247.834		3.20262e-09	133.662		3.20262e-08	207.876		3.20262e-07	113.997
							3.23228e-18	454.224	3.23228e-05	180.233		3.23228e-12	268.082		3.23228e-12	281.684		3.23228e-11	248.515		3.23228e-09	134.168		3.23228e-08	208.358		3.23228e-07	114.289
							3.26222e-18	455.221	3.26222e-05	180.728		3.26222e-12	268.772		3.26222e-12	282.311		3.26222e-11	249.198		3.26222e-09	134.676		3.26222e-08	208.84		3.26222e-07	114.582
							3.29244e-18	456.221	3.29244e-05	181.224		3.29244e-12	269.463		3.29244e-12	282.939		3.29244e-11	249.883		3.29244e-09	135.185		3.29244e-08	209.324		3.29244e-07	114.876
							3.32293e-18	457.222	3.32293e-05	181.722		3.32293e-12	270.156		3.32293e-12	283.568		3.32293e-11	250.57		3.32293e-09	135.697		3.32293e-08	209.81		3.32293e-07	115.17
							3.35371e-18	458.226	3.35371e-05	182.22		3.35371e-12	270.851		3.35371e-12	284.199		3.35371e-11	251.259		3.35371e-09	136.21		3.35371e-08	210.296		3.35371e-07	115.465
							3.38477e-18	459.232	3.38477e-05	182.721		3.38477e-12	271.547		3.38477e-12	284.831		3.38477e-11	251.949		3.38477e-09	136.726		3.38477e-08	210.783		3.38477e-07	115.761
							3.41612e-18	460.24	3.41612e-05	183.222		3.41612e-12	272.246		3.41612e-12	285.464		3.41612e-11	252.642		3.41612e-09	137.243		3.41612e-08	211.272		3.41612e-07	116.057
							3.44776e-18	461.25	3.44776e-05	183.725		3.44776e-12	272.946		3.44776e-12	286.099		3.44776e-11	253.336		3.44776e-09	137.763		3.44776e-08	211.761		3.44776e-07	116.355
							3.4797e-18	462.263	3.4797e-05	184.229		3.4797e-12	273.648		3.4797e-12	286.736		3.4797e-11	254.032		3.4797e-09	138.284		3.4797e-08	212.252		3.4797e-07	116.653
							3.51193e-18	463.278	3.51193e-05	184.735		3.51193e-12	274.352		3.51193e-12	287.373		3.51193e-11	254.731		3.51193e-09	138.807		3.51193e-08	212.744		3.51193e-07	116.952
							3.54446e-18	464.295	3.54446e-05	185.242		3.54446e-12	275.057		3.54446e-12	288.013		3.54446e-11	255.431		3.54446e-09	139.333		3.54446e-08	213.237		3.54446e-07	117.251
							3.57729e-18	465.314	3.57729e-05	185.75		3.57729e-12	275.765		3.57729e-12	288.653		3.57729e-11	256.133		3.57729e-09	139.86		3.57729e-08	213.731		3.57729e-07	117.552
							3.61042e-18	466.336	3.61042e-05	186.26		3.61042e-12	276.474		3.61042e-12	289.295		3.61042e-11	256.837		3.61042e-09	140.389		3.61042e-08	214.227		3.61042e-07	117.853
							3.64386e-18	467.359	3.64386e-05	186.771		3.64386e-12	277.185		3.64386e-12	289.939		3.64386e-11	257.543		3.64386e-09	140.92		3.64386e-08	214.723		3.64386e-07	118.155
							3.67761e-18	468.385	3.67761e-05	187.284		3.67761e-12	277.898		3.67761e-12	290.584		3.67761e-11	258.25		3.67761e-09	141.454		3.67761e-08	215.221		3.67761e-07	118.457
							3.71167e-18	469.414	3.71167e-05	187.798		3.71167e-12	278.613		3.71167e-12	291.23		3.71167e-11	258.96		3.71167e-09	141.989		3.71167e-08	215.72		3.71167e-07	118.761
							3.74605e-18	470.444	3.74605e-05	188.313		3.74605e-12	279.329		3.74605e-12	291.878		3.74605e-11	259.672		3.74605e-09	142.526		3.74605e-08	216.22		3.74605e-07	119.065
							3.78075e-18	471.477	3.78075e-05	188.83		3.78075e-12	280.047		3.78075e-12	292.527		3.78075e-11	260.386		3.78075e-09	143.066		3.78075e-08	216.721		3.78075e-07	119.37
							3.81576e-18	472.512	3.81576e-05	189.349		3.81576e-12	280.768		3.81576e-12	293.178		3.81576e-11	261.101		3.81576e-09	143.607		3.81576e-08	217.223		3.81576e-07	119.676
							3.85111e-18	473.549	3.85111e-05	189.868		3.85111e-12	281.49		3.85111e-12	293.83		3.85111e-11	261.819		3.85111e-09	144.15		3.85111e-08	217.727		3.85111e-07	119.983
							3.88678e-18	474.589	3.88678e-05	190.389		3.88678e-12	282.214		3.88678e-12	294.483		3.88678e-11	262.538		3.88678e-09	144.696		3.88678e-08	218.231		3.88678e-07	120.29
							3.92278e-18	475.631	3.92278e-05	190.912		3.92278e-12	282.94		3.92278e-12	295.138		3.92278e-11	263.26		3.92278e-09	145.244		3.92278e-08	218.737		3.92278e-07	120.598
							3.95911e-18	476.675	3.95911e-05	191.436		3.95911e-12	283.667		3.95911e-12	295.795		3.95911e-11	263.983		3.95911e-09	145.793		3.95911e-08	219.244		3.95911e-07	120.907
							3.99578e-18	477.721	3.99578e-05	191.961		3.99578e-12	284.397		3.99578e-12	296.453		3.99578e-11	264.709		3.99578e-09	146.345		3.99578e-08	219.752		3.99578e-07	121.217
							4.03279e-18	478.77	4.03279e-05	192.488		4.03279e-12	285.128		4.03279e-12	297.112		4.03279e-11	265.437		4.03279e-09	146.899		4.03279e-08	220.261		4.03279e-07	121.527
							4.07014e-18	479.821	4.07014e-05	193.017		4.07014e-12	285.861		4.07014e-12	297.773		4.07014e-11	266.166		4.07014e-09	147.455		4.07014e-08	220.772		4.07014e-07	121.839
							4.10784e-18	480.874	4.10784e-05	193.546		4.10784e-12	286.597		4.10784e-12	298.435		4.10784e-11	266.898		4.10784e-09	148.013		4.10784e-08	221.283		4.10784e-07	122.151
							4.14589e-18	481.93	4.14589e-05	194.078		4.14589e-12	287.334		4.14589e-12	299.099		4.14589e-11	267.631		4.14589e-09	148.573		4.14589e-08	221.796		4.14589e-07	122.464
							4.18429e-18	482.988	4.18429e-05	194.61		4.18429e-12	288.073		4.18429e-12	299.764		4.18429e-11	268.367		4.18429e-09	149.135		4.18429e-08	222.31		4.18429e-07	122.777
							4.22304e-18	484.048	4.22304e-05	195.144		4.22304e-12	288.814		4.22304e-12	300.431		4.22304e-11	269.104		4.22304e-09	149.699		4.22304e-08	222.826		4.22304e-07	123.092
							4.26216e-18	485.111	4.26216e-05	195.68		4.26216e-12	289.556		4.26216e-12	301.099		4.26216e-11	269.844		4.26216e-09	150.266		4.26216e-08	223.342		4.26216e-07	123.407
							4.30164e-18	486.176	4.30164e-05	196.217		4.30164e-12	290.301		4.30164e-12	301.769		4.30164e-11	270.585		4.30164e-09	150.834		4.30164e-08	223.86		4.30164e-07	123.723
							4.34148e-18	487.243	4.34148e-05	196.756		4.34148e-12	291.048		4.34148e-12	302.44		4.34148e-11	271.329		4.34148e-09	151.405		4.34148e-08	224.378		4.34148e-07	124.04
							4.38169e-18	488.313	4.38169e-05	197.296		4.38169e-12	291.796		4.38169e-12	303.113		4.38169e-11	272.075		4.38169e-09	151.978		4.38169e-08	224.898		4.38169e-07	124.358
							4.42227e-18	489.385	4.42227e-05	197.837		4.42227e-12	292.547		4.42227e-12	303.787		4.42227e-11	272.823		4.42227e-09	152.553		4.42227e-08	225.42		4.42227e-07	124.677
							4.46323e-18	490.459	4.46323e-05	198.38		4.46323e-12	293.299		4.46323e-12	304.463		4.46323e-11	273.572		4.46323e-09	153.131		4.46323e-08	225.942		4.46323e-07	124.996
							4.50457e-18	491.536	4.50457e-05	198.925		4.50457e-12	294.053		4.50457e-12	305.14		4.50457e-11	274.324		4.50457e-09	153.71		4.50457e-08	226.466		4.50457e-07	125.316
							4.5463e-18	492.615	4.5463e-05	199.471		4.5463e-12	294.81		4.5463e-12	305.819		4.5463e-11	275.078		4.5463e-09	154.292		4.5463e-08	226.991		4.5463e-07	125.637
							4.5884e-18	493.696	4.5884e-05	200.018		4.5884e-12	295.568		4.5884e-12	306.499		4.5884e-11	275.834		4.5884e-09	154.876		4.5884e-08	227.517		4.5884e-07	125.959
							4.6309e-18	494.78	4.6309e-05	200.567		4.6309e-12	296.328		4.6309e-12	307.181		4.6309e-11	276.592		4.6309e-09	155.462		4.6309e-08	228.044		4.6309e-07	126.282
							4.6738e-18	495.866	4.6738e-05	201.118		4.6738e-12	297.09		4.6738e-12	307.864		4.6738e-11	277.353		4.6738e-09	156.05		4.6738e-08	228.573		4.6738e-07	126.606
							4.71708e-18	496.955	4.71708e-05	201.67		4.71708e-12	297.854		4.71708e-12	308.549		4.71708e-11	278.115		4.71708e-09	156.641		4.71708e-08	229.102		4.71708e-07	126.93
							4.76078e-18	498.046	4.76078e-05	202.223		4.76078e-12	298.62		4.76078e-12	309.235		4.76078e-11	278.879		4.76078e-09	157.233		4.76078e-08	229.633		4.76078e-07	127.255
							4.80487e-18	499.139	4.80487e-05	202.778		4.80487e-12	299.388		4.80487e-12	309.923		4.80487e-11	279.646		4.80487e-09	157.828		4.80487e-08	230.166		4.80487e-07	127.581
							4.84937e-18	500.235	4.84937e-05	203.335		4.84937e-12	300.158		4.84937e-12	310.612		4.84937e-11	280.414		4.84937e-09	158.426		4.84937e-08	230.699		4.84937e-07	127.908
							4.89429e-18	501.333	4.89429e-05	203.893		4.89429e-12	300.93		4.89429e-12	311.303		4.89429e-11	281.185		4.89429e-09	159.025		4.89429e-08	231.234		4.89429e-07	128.236
							4.93962e-18	502.434	4.93962e-05	204.452		4.93962e-12	301.704		4.93962e-12	311.996		4.93962e-11	281.958		4.93962e-09	159.627		4.93962e-08	231.77		4.93962e-07	128.564
							4.98537e-18	503.537	4.98537e-05	205.014		4.98537e-12	302.48		4.98537e-12	312.69		4.98537e-11	282.733		4.98537e-09	160.231		4.98537e-08	232.307		4.98537e-07	128.893
							5.03155e-18	504.642	5.03155e-05	205.576		5.03155e-12	303.258		5.03155e-12	313.385		5.03155e-11	283.51		5.03155e-09	160.837		5.03155e-08	232.845		5.03155e-07	129.224
							5.07815e-18	505.75	5.07815e-05	206.14		5.07815e-12	304.038		5.07815e-12	314.082		5.07815e-11	284.289		5.07815e-09	161.446		5.07815e-08	233.385		5.07815e-07	129.555
							5.12519e-18	506.86	5.12519e-05	206.706		5.12519e-12	304.82		5.12519e-12	314.781		5.12519e-11	285.07		5.12519e-09	162.057		5.12519e-08	233.926		5.12519e-07	129.887
							5.17266e-18	507.973	5.17266e-05	207.274		5.17266e-12	305.604		5.17266e-12	315.481		5.17266e-11	285.854		5.17266e-09	162.67		5.17266e-08	234.468		5.17266e-07	130.219
							5.22057e-18	509.088	5.22057e-05	207.843		5.22057e-12	306.39		5.22057e-12	316.183		5.22057e-11	286.639		5.22057e-09	163.286		5.22057e-08	235.011		5.22057e-07	130.553
							5.26892e-18	510.206	5.26892e-05	208.413		5.26892e-12	307.178		5.26892e-12	316.886		5.26892e-11	287.427		5.26892e-09	163.904		5.26892e-08	235.556		5.26892e-07	130.887
							5.31772e-18	511.326	5.31772e-05	208.985		5.31772e-12	307.968		5.31772e-12	317.591		5.31772e-11	288.217		5.31772e-09	164.524		5.31772e-08	236.102		5.31772e-07	131.223
							5.36698e-18	512.448	5.36698e-05	209.559		5.36698e-12	308.76		5.36698e-12	318.297		5.36698e-11	289.009		5.36698e-09	165.147		5.36698e-08	236.649		5.36698e-07	131.559
							5.41669e-18	513.573	5.41669e-05	210.134		5.41669e-12	309.554		5.41669e-12	319.005		5.41669e-11	289.804		5.41669e-09	165.772		5.41669e-08	237.197		5.41669e-07	131.896
							5.46686e-18	514.701	5.46686e-05	210.711		5.46686e-12	310.35		5.46686e-12	319.715		5.46686e-11	290.6		5.46686e-09	166.399		5.46686e-08	237.747		5.46686e-07	132.234
							5.51749e-18	515.831	5.51749e-05	211.289		5.51749e-12	311.148		5.51749e-12	320.426		5.51749e-11	291.399		5.51749e-09	167.029		5.51749e-08	238.298		5.51749e-07	132.573
							5.5686e-18	516.963	5.5686e-05	211.869		5.5686e-12	311.948		5.5686e-12	321.139		5.5686e-11	292.2		5.5686e-09	167.661		5.5686e-08	238.851		5.5686e-07	132.912
							5.62017e-18	518.098	5.62017e-05	212.45		5.62017e-12	312.75		5.62017e-12	321.853		5.62017e-11	293.003		5.62017e-09	168.295		5.62017e-08	239.404		5.62017e-07	133.253
							5.67223e-18	519.235	5.67223e-05	213.033		5.67223e-12	313.555		5.67223e-12	322.569		5.67223e-11	293.808		5.67223e-09	168.932		5.67223e-08	239.959		5.67223e-07	133.594
							5.72477e-18	520.375	5.72477e-05	213.618		5.72477e-12	314.361		5.72477e-12	323.286		5.72477e-11	294.616		5.72477e-09	169.571		5.72477e-08	240.515		5.72477e-07	133.936
							5.77779e-18	521.517	5.77779e-05	214.204		5.77779e-12	315.17		5.77779e-12	324.005		5.77779e-11	295.425		5.77779e-09	170.213		5.77779e-08	241.073		5.77779e-07	134.279
							5.83131e-18	522.662	5.83131e-05	214.792		5.83131e-12	315.98		5.83131e-12	324.726		5.83131e-11	296.237		5.83131e-09	170.857		5.83131e-08	241.631		5.83131e-07	134.623
							5.88532e-18	523.81	5.88532e-05	215.382		5.88532e-12	316.793		5.88532e-12	325.448		5.88532e-11	297.051		5.88532e-09	171.504		5.88532e-08	242.191		5.88532e-07	134.968
							5.93983e-18	524.96	5.93983e-05	215.973		5.93983e-12	317.608		5.93983e-12	326.172		5.93983e-11	297.868		5.93983e-09	172.153		5.93983e-08	242.753		5.93983e-07	135.314
							5.99484e-18	526.112	5.99484e-05	216.566		5.99484e-12	318.425		5.99484e-12	326.898		5.99484e-11	298.687		5.99484e-09	172.804		5.99484e-08	243.315		5.99484e-07	135.661
							6.05037e-18	527.267	6.05037e-05	217.16		6.05037e-12	319.243		6.05037e-12	327.625		6.05037e-11	299.507		6.05037e-09	173.458		6.05037e-08	243.879		6.05037e-07	136.008
							6.10641e-18	528.425	6.10641e-05	217.756		6.10641e-12	320.064		6.10641e-12	328.354		6.10641e-11	300.331		6.10641e-09	174.115		6.10641e-08	244.444		6.10641e-07	136.357
							6.16297e-18	529.585	6.16297e-05	218.354		6.16297e-12	320.888		6.16297e-12	329.084		6.16297e-11	301.156		6.16297e-09	174.773		6.16297e-08	245.011		6.16297e-07	136.706
							6.22005e-18	530.747	6.22005e-05	218.953		6.22005e-12	321.713		6.22005e-12	329.816		6.22005e-11	301.984		6.22005e-09	175.435		6.22005e-08	245.579		6.22005e-07	137.056
							6.27766e-18	531.912	6.27766e-05	219.554		6.27766e-12	322.54		6.27766e-12	330.55		6.27766e-11	302.814		6.27766e-09	176.099		6.27766e-08	246.148		6.27766e-07	137.407
							6.3358e-18	533.08	6.3358e-05	220.157		6.3358e-12	323.37		6.3358e-12	331.285		6.3358e-11	303.646		6.3358e-09	176.765		6.3358e-08	246.718		6.3358e-07	137.759
							6.39449e-18	534.25	6.39449e-05	220.761		6.39449e-12	324.201		6.39449e-12	332.022		6.39449e-11	304.48		6.39449e-09	177.434		6.39449e-08	247.29		6.39449e-07	138.112
							6.45372e-18	535.423	6.45372e-05	221.367		6.45372e-12	325.035		6.45372e-12	332.76		6.45372e-11	305.317		6.45372e-09	178.106		6.45372e-08	247.863		6.45372e-07	138.466
							6.51349e-18	536.599	6.51349e-05	221.975		6.51349e-12	325.871		6.51349e-12	333.5		6.51349e-11	306.156		6.51349e-09	178.78		6.51349e-08	248.438		6.51349e-07	138.821
							6.57382e-18	537.777	6.57382e-05	222.584		6.57382e-12	326.709		6.57382e-12	334.242		6.57382e-11	306.998		6.57382e-09	179.456		6.57382e-08	249.013		6.57382e-07	139.177
							6.63471e-18	538.957	6.63471e-05	223.195		6.63471e-12	327.55		6.63471e-12	334.986		6.63471e-11	307.842		6.63471e-09	180.135		6.63471e-08	249.591		6.63471e-07	139.533
							6.69616e-18	540.14	6.69616e-05	223.807		6.69616e-12	328.392		6.69616e-12	335.731		6.69616e-11	308.688		6.69616e-09	180.817		6.69616e-08	250.169		6.69616e-07	139.891
							6.75818e-18	541.326	6.75818e-05	224.422		6.75818e-12	329.236		6.75818e-12	336.477		6.75818e-11	309.536		6.75818e-09	181.501		6.75818e-08	250.749		6.75818e-07	140.249
							6.82078e-18	542.514	6.82078e-05	225.038		6.82078e-12	330.083		6.82078e-12	337.226		6.82078e-11	310.387		6.82078e-09	182.188		6.82078e-08	251.33		6.82078e-07	140.608
							6.88395e-18	543.705	6.88395e-05	225.655		6.88395e-12	330.932		6.88395e-12	337.976		6.88395e-11	311.24		6.88395e-09	182.877		6.88395e-08	251.913		6.88395e-07	140.968
							6.94771e-18	544.899	6.94771e-05	226.275		6.94771e-12	331.783		6.94771e-12	338.728		6.94771e-11	312.095		6.94771e-09	183.57		6.94771e-08	252.496		6.94771e-07	141.33
							7.01206e-18	546.095	7.01206e-05	226.896		7.01206e-12	332.637		7.01206e-12	339.481		7.01206e-11	312.953		7.01206e-09	184.264		7.01206e-08	253.082		7.01206e-07	141.692
							7.07701e-18	547.294	7.07701e-05	227.518		7.07701e-12	333.492		7.07701e-12	340.236		7.07701e-11	313.813		7.07701e-09	184.961		7.07701e-08	253.668		7.07701e-07	142.055
							7.14256e-18	548.495	7.14256e-05	228.143		7.14256e-12	334.35		7.14256e-12	340.993		7.14256e-11	314.676		7.14256e-09	185.661		7.14256e-08	254.256		7.14256e-07	142.419
							7.20872e-18	549.7	7.20872e-05	228.769		7.20872e-12	335.21		7.20872e-12	341.751		7.20872e-11	315.54		7.20872e-09	186.364		7.20872e-08	254.845		7.20872e-07	142.783
							7.27548e-18	550.906	7.27548e-05	229.397		7.27548e-12	336.072		7.27548e-12	342.512		7.27548e-11	316.408		7.27548e-09	187.069		7.27548e-08	255.436		7.27548e-07	143.149
							7.34287e-18	552.116	7.34287e-05	230.026		7.34287e-12	336.936		7.34287e-12	343.273		7.34287e-11	317.277		7.34287e-09	187.777		7.34287e-08	256.028		7.34287e-07	143.516
							7.41088e-18	553.328	7.41088e-05	230.658		7.41088e-12	337.803		7.41088e-12	344.037		7.41088e-11	318.149		7.41088e-09	188.488		7.41088e-08	256.621		7.41088e-07	143.884
							7.47952e-18	554.543	7.47952e-05	231.291		7.47952e-12	338.671		7.47952e-12	344.802		7.47952e-11	319.024		7.47952e-09	189.201		7.47952e-08	257.216		7.47952e-07	144.252
							7.5488e-18	555.76	7.5488e-05	231.926		7.5488e-12	339.542		7.5488e-12	345.569		7.5488e-11	319.901		7.5488e-09	189.917		7.5488e-08	257.812		7.5488e-07	144.622
							7.61872e-18	556.98	7.61872e-05	232.562		7.61872e-12	340.416		7.61872e-12	346.338		7.61872e-11	320.78		7.61872e-09	190.636		7.61872e-08	258.41		7.61872e-07	144.992
							7.68928e-18	558.203	7.68928e-05	233.201		7.68928e-12	341.291		7.68928e-12	347.108		7.68928e-11	321.661		7.68928e-09	191.357		7.68928e-08	259.009		7.68928e-07	145.364
							7.7605e-18	559.428	7.7605e-05	233.841		7.7605e-12	342.169		7.7605e-12	347.88		7.7605e-11	322.545		7.7605e-09	192.081		7.7605e-08	259.609		7.7605e-07	145.736
							7.83238e-18	560.656	7.83238e-05	234.482		7.83238e-12	343.049		7.83238e-12	348.654		7.83238e-11	323.432		7.83238e-09	192.808		7.83238e-08	260.211		7.83238e-07	146.109
							7.90493e-18	561.887	7.90493e-05	235.126		7.90493e-12	343.931		7.90493e-12	349.43		7.90493e-11	324.321		7.90493e-09	193.538		7.90493e-08	260.814		7.90493e-07	146.484
							7.97814e-18	563.121	7.97814e-05	235.771		7.97814e-12	344.816		7.97814e-12	350.207		7.97814e-11	325.212		7.97814e-09	194.27		7.97814e-08	261.418		7.97814e-07	146.859
							8.05204e-18	564.357	8.05204e-05	236.419		8.05204e-12	345.702		8.05204e-12	350.986		8.05204e-11	326.106		8.05204e-09	195.005		8.05204e-08	262.024		8.05204e-07	147.235
							8.12662e-18	565.596	8.12662e-05	237.067		8.12662e-12	346.592		8.12662e-12	351.766		8.12662e-11	327.002		8.12662e-09	195.743		8.12662e-08	262.631		8.12662e-07	147.612
							8.20189e-18	566.837	8.20189e-05	237.718		8.20189e-12	347.483		8.20189e-12	352.549		8.20189e-11	327.901		8.20189e-09	196.484		8.20189e-08	263.24		8.20189e-07	147.991
							8.27786e-18	568.082	8.27786e-05	238.371		8.27786e-12	348.377		8.27786e-12	353.333		8.27786e-11	328.802		8.27786e-09	197.228		8.27786e-08	263.85		8.27786e-07	148.37
							8.35453e-18	569.329	8.35453e-05	239.025		8.35453e-12	349.273		8.35453e-12	354.119		8.35453e-11	329.706		8.35453e-09	197.974		8.35453e-08	264.462		8.35453e-07	148.75
							8.43191e-18	570.579	8.43191e-05	239.681		8.43191e-12	350.171		8.43191e-12	354.907		8.43191e-11	330.612		8.43191e-09	198.723		8.43191e-08	265.074		8.43191e-07	149.131
							8.51001e-18	571.831	8.51001e-05	240.339		8.51001e-12	351.071		8.51001e-12	355.696		8.51001e-11	331.521		8.51001e-09	199.475		8.51001e-08	265.689		8.51001e-07	149.513
							8.58883e-18	573.087	8.58883e-05	240.998		8.58883e-12	351.974		8.58883e-12	356.487		8.58883e-11	332.432		8.58883e-09	200.23		8.58883e-08	266.305		8.58883e-07	149.896
							8.66838e-18	574.345	8.66838e-05	241.66		8.66838e-12	352.879		8.66838e-12	357.28		8.66838e-11	333.346		8.66838e-09	200.988		8.66838e-08	266.922		8.66838e-07	150.28
							8.74867e-18	575.605	8.74867e-05	242.323		8.74867e-12	353.787		8.74867e-12	358.075		8.74867e-11	334.262		8.74867e-09	201.748		8.74867e-08	267.54		8.74867e-07	150.665
							8.8297e-18	576.869	8.8297e-05	242.988		8.8297e-12	354.697		8.8297e-12	358.871		8.8297e-11	335.18		8.8297e-09	202.512		8.8297e-08	268.16		8.8297e-07	151.051
							8.91148e-18	578.135	8.91148e-05	243.655		8.91148e-12	355.609		8.91148e-12	359.669		8.91148e-11	336.102		8.91148e-09	203.278		8.91148e-08	268.782		8.91148e-07	151.438
							8.99402e-18	579.405	8.99402e-05	244.324		8.99402e-12	356.524		8.99402e-12	360.469		8.99402e-11	337.025		8.99402e-09	204.048		8.99402e-08	269.405		8.99402e-07	151.826
							9.07733e-18	580.677	9.07733e-05	244.994		9.07733e-12	357.441		9.07733e-12	361.271		9.07733e-11	337.952		9.07733e-09	204.82		9.07733e-08	270.029		9.07733e-07	152.215
							9.1614e-18	581.951	9.1614e-05	245.667		9.1614e-12	358.36		9.1614e-12	362.075		9.1614e-11	338.88		9.1614e-09	205.595		9.1614e-08	270.655		9.1614e-07	152.605
							9.24626e-18	583.229	9.24626e-05	246.341		9.24626e-12	359.282		9.24626e-12	362.88		9.24626e-11	339.812		9.24626e-09	206.373		9.24626e-08	271.282		9.24626e-07	152.996
							9.3319e-18	584.509	9.3319e-05	247.017		9.3319e-12	360.206		9.3319e-12	363.687		9.3319e-11	340.746		9.3319e-09	207.154		9.3319e-08	271.911		9.3319e-07	153.388
							9.41833e-18	585.792	9.41833e-05	247.695		9.41833e-12	361.132		9.41833e-12	364.496		9.41833e-11	341.682		9.41833e-09	207.938		9.41833e-08	272.541		9.41833e-07	153.781
							9.50557e-18	587.078	9.50557e-05	248.375		9.50557e-12	362.061		9.50557e-12	365.307		9.50557e-11	342.621		9.50557e-09	208.725		9.50557e-08	273.173		9.50557e-07	154.175
							9.59361e-18	588.367	9.59361e-05	249.057		9.59361e-12	362.992		9.59361e-12	366.12		9.59361e-11	343.563		9.59361e-09	209.514		9.59361e-08	273.806		9.59361e-07	154.57
							9.68247e-18	589.659	9.68247e-05	249.74		9.68247e-12	363.925		9.68247e-12	366.934		9.68247e-11	344.507		9.68247e-09	210.307		9.68247e-08	274.441		9.68247e-07	154.966
							9.77215e-18	590.953	9.77215e-05	250.426		9.77215e-12	364.861		9.77215e-12	367.75		9.77215e-11	345.454		9.77215e-09	211.103		9.77215e-08	275.077		9.77215e-07	155.363
							9.86266e-18	592.251	9.86266e-05	251.113		9.86266e-12	365.8		9.86266e-12	368.568		9.86266e-11	346.403		9.86266e-09	211.902		9.86266e-08	275.714		9.86266e-07	155.761
							9.95401e-18	593.551	9.95401e-05	251.802		9.95401e-12	366.741		9.95401e-12	369.388		9.95401e-11	347.356		9.95401e-09	212.704		9.95401e-08	276.353		9.95401e-07	156.16
							1.00462e-17	594.854	0.000100462	252.494		1.00462e-11	367.684		1.00462e-11	370.21		1.00462e-10	348.31		1.00462e-08	213.509		1.00462e-07	276.994		1.00462e-06	156.56
							1.01393e-17	596.16	0.000101393	253.187		1.01393e-11	368.629		1.01393e-11	371.033		1.01393e-10	349.268		1.01393e-08	214.317		1.01393e-07	277.636		1.01393e-06	156.961
							1.02332e-17	597.468	0.000102332	253.881		1.02332e-11	369.577		1.02332e-11	371.858		1.02332e-10	350.227		1.02332e-08	215.128		1.02332e-07	278.279		1.02332e-06	157.363
							1.03279e-17	598.78	0.000103279	254.578		1.03279e-11	370.528		1.03279e-11	372.685		1.03279e-10	351.19		1.03279e-08	215.942		1.03279e-07	278.924		1.03279e-06	157.766
							1.04236e-17	600.095	0.000104236	255.277		1.04236e-11	371.481		1.04236e-11	373.514		1.04236e-10	352.155		1.04236e-08	216.759		1.04236e-07	279.571		1.04236e-06	158.17
							1.05202e-17	601.412	0.000105202	255.978		1.05202e-11	372.436		1.05202e-11	374.345		1.05202e-10	353.123		1.05202e-08	217.579		1.05202e-07	280.218		1.05202e-06	158.575
							1.06176e-17	602.732	0.000106176	256.68		1.06176e-11	373.394		1.06176e-11	375.178		1.06176e-10	354.094		1.06176e-08	218.403		1.06176e-07	280.868		1.06176e-06	158.982
							1.07159e-17	604.055	0.000107159	257.385		1.07159e-11	374.354		1.07159e-11	376.012		1.07159e-10	355.067		1.07159e-08	219.229		1.07159e-07	281.519		1.07159e-06	159.389
							1.08152e-17	605.381	0.000108152	258.091		1.08152e-11	375.317		1.08152e-11	376.849		1.08152e-10	356.043		1.08152e-08	220.059		1.08152e-07	282.171		1.08152e-06	159.797
							1.09154e-17	606.71	0.000109154	258.8		1.09154e-11	376.282		1.09154e-11	377.687		1.09154e-10	357.021		1.09154e-08	220.892		1.09154e-07	282.825		1.09154e-06	160.207
							1.10165e-17	608.042	0.000110165	259.51		1.10165e-11	377.25		1.10165e-11	378.527		1.10165e-10	358.002		1.10165e-08	221.728		1.10165e-07	283.481		1.10165e-06	160.617
							1.11185e-17	609.377	0.000111185	260.222		1.11185e-11	378.22		1.11185e-11	379.369		1.11185e-10	358.986		1.11185e-08	222.567		1.11185e-07	284.138		1.11185e-06	161.029
							1.12215e-17	610.715	0.000112215	260.936		1.12215e-11	379.193		1.12215e-11	380.213		1.12215e-10	359.973		1.12215e-08	223.409		1.12215e-07	284.796		1.12215e-06	161.441
							1.13254e-17	612.056	0.000113254	261.653		1.13254e-11	380.168		1.13254e-11	381.058		1.13254e-10	360.962		1.13254e-08	224.254		1.13254e-07	285.456		1.13254e-06	161.855
							1.14303e-17	613.399	0.000114303	262.371		1.14303e-11	381.146		1.14303e-11	381.906		1.14303e-10	361.954		1.14303e-08	225.103		1.14303e-07	286.118		1.14303e-06	162.269
							1.15362e-17	614.746	0.000115362	263.091		1.15362e-11	382.126		1.15362e-11	382.755		1.15362e-10	362.949		1.15362e-08	225.955		1.15362e-07	286.781		1.15362e-06	162.685
							1.1643e-17	616.095	0.00011643	263.813		1.1643e-11	383.109		1.1643e-11	383.607		1.1643e-10	363.947		1.1643e-08	226.81		1.1643e-07	287.446		1.1643e-06	163.102
							1.17509e-17	617.448	0.000117509	264.537		1.17509e-11	384.094		1.17509e-11	384.46		1.17509e-10	364.947		1.17509e-08	227.668		1.17509e-07	288.112		1.17509e-06	163.52
							1.18597e-17	618.803	0.000118597	265.263		1.18597e-11	385.082		1.18597e-11	385.315		1.18597e-10	365.95		1.18597e-08	228.53		1.18597e-07	288.78		1.18597e-06	163.939
							1.19696e-17	620.162	0.000119696	265.991		1.19696e-11	386.072		1.19696e-11	386.172		1.19696e-10	366.956		1.19696e-08	229.395		1.19696e-07	289.449		1.19696e-06	164.359
							1.20804e-17	621.523	0.000120804	266.721		1.20804e-11	387.065		1.20804e-11	387.031		1.20804e-10	367.964		1.20804e-08	230.263		1.20804e-07	290.12		1.20804e-06	164.78
							1.21923e-17	622.888	0.000121923	267.453		1.21923e-11	388.061		1.21923e-11	387.892		1.21923e-10	368.976		1.21923e-08	231.134		1.21923e-07	290.792		1.21923e-06	165.202
							1.23052e-17	624.255	0.000123052	268.187		1.23052e-11	389.059		1.23052e-11	388.755		1.23052e-10	369.99		1.23052e-08	232.009		1.23052e-07	291.466		1.23052e-06	165.625
							1.24192e-17	625.626	0.000124192	268.923		1.24192e-11	390.059		1.24192e-11	389.62		1.24192e-10	371.007		1.24192e-08	232.887		1.24192e-07	292.142		1.24192e-06	166.049
							1.25342e-17	626.999	0.000125342	269.661		1.25342e-11	391.063		1.25342e-11	390.486		1.25342e-10	372.026		1.25342e-08	233.768		1.25342e-07	292.819		1.25342e-06	166.475
							1.26503e-17	628.375	0.000126503	270.402		1.26503e-11	392.068		1.26503e-11	391.355		1.26503e-10	373.049		1.26503e-08	234.653		1.26503e-07	293.497		1.26503e-06	166.901
							1.27675e-17	629.755	0.000127675	271.144		1.27675e-11	393.077		1.27675e-11	392.225		1.27675e-10	374.074		1.27675e-08	235.541		1.27675e-07	294.178		1.27675e-06	167.329
							1.28858e-17	631.137	0.000128858	271.888		1.28858e-11	394.088		1.28858e-11	393.098		1.28858e-10	375.102		1.28858e-08	236.432		1.28858e-07	294.859		1.28858e-06	167.757
							1.30051e-17	632.523	0.000130051	272.634		1.30051e-11	395.101		1.30051e-11	393.972		1.30051e-10	376.133		1.30051e-08	237.327		1.30051e-07	295.543		1.30051e-06	168.187
							1.31256e-17	633.912	0.000131256	273.383		1.31256e-11	396.117		1.31256e-11	394.848		1.31256e-10	377.167		1.31256e-08	238.225		1.31256e-07	296.228		1.31256e-06	168.618
							1.32471e-17	635.303	0.000132471	274.133		1.32471e-11	397.136		1.32471e-11	395.727		1.32471e-10	378.203		1.32471e-08	239.126		1.32471e-07	296.914		1.32471e-06	169.05
							1.33698e-17	636.698	0.000133698	274.885		1.33698e-11	398.157		1.33698e-11	396.607		1.33698e-10	379.243		1.33698e-08	240.031		1.33698e-07	297.602		1.33698e-06	169.483
							1.34937e-17	638.096	0.000134937	275.64		1.34937e-11	399.181		1.34937e-11	397.489		1.34937e-10	380.285		1.34937e-08	240.94		1.34937e-07	298.292		1.34937e-06	169.917
							1.36187e-17	639.496	0.000136187	276.396		1.36187e-11	400.208		1.36187e-11	398.373		1.36187e-10	381.33		1.36187e-08	241.851		1.36187e-07	298.983		1.36187e-06	170.353
							1.37448e-17	640.9	0.000137448	277.155		1.37448e-11	401.237		1.37448e-11	399.259		1.37448e-10	382.378		1.37448e-08	242.767		1.37448e-07	299.676		1.37448e-06	170.789
							1.38721e-17	642.307	0.000138721	277.916		1.38721e-11	402.269		1.38721e-11	400.147		1.38721e-10	383.429		1.38721e-08	243.685		1.38721e-07	300.371		1.38721e-06	171.227
							1.40006e-17	643.717	0.000140006	278.678		1.40006e-11	403.304		1.40006e-11	401.037		1.40006e-10	384.483		1.40006e-08	244.607		1.40006e-07	301.067		1.40006e-06	171.665
							1.41303e-17	645.13	0.000141303	279.443		1.41303e-11	404.341		1.41303e-11	401.929		1.41303e-10	385.54		1.41303e-08	245.533		1.41303e-07	301.765		1.41303e-06	172.105
							1.42611e-17	646.547	0.000142611	280.21		1.42611e-11	405.381		1.42611e-11	402.823		1.42611e-10	386.599		1.42611e-08	246.462		1.42611e-07	302.464		1.42611e-06	172.546
							1.43932e-17	647.966	0.000143932	280.979		1.43932e-11	406.423		1.43932e-11	403.719		1.43932e-10	387.662		1.43932e-08	247.395		1.43932e-07	303.165		1.43932e-06	172.988
							1.45265e-17	649.388	0.000145265	281.751		1.45265e-11	407.469		1.45265e-11	404.617		1.45265e-10	388.727		1.45265e-08	248.331		1.45265e-07	303.868		1.45265e-06	173.431
							1.46611e-17	650.814	0.000146611	282.524		1.46611e-11	408.517		1.46611e-11	405.517		1.46611e-10	389.796		1.46611e-08	249.271		1.46611e-07	304.572		1.46611e-06	173.875
							1.47969e-17	652.243	0.000147969	283.299		1.47969e-11	409.567		1.47969e-11	406.419		1.47969e-10	390.867		1.47969e-08	250.214		1.47969e-07	305.278		1.47969e-06	174.321
							1.49339e-17	653.675	0.000149339	284.077		1.49339e-11	410.621		1.49339e-11	407.323		1.49339e-10	391.941		1.49339e-08	251.161		1.49339e-07	305.986		1.49339e-06	174.767
							1.50723e-17	655.11	0.000150723	284.857		1.50723e-11	411.677		1.50723e-11	408.229		1.50723e-10	393.019		1.50723e-08	252.112		1.50723e-07	306.695		1.50723e-06	175.215
							1.52119e-17	656.548	0.000152119	285.638		1.52119e-11	412.735		1.52119e-11	409.137		1.52119e-10	394.099		1.52119e-08	253.066		1.52119e-07	307.405		1.52119e-06	175.664
							1.53528e-17	657.989	0.000153528	286.422		1.53528e-11	413.797		1.53528e-11	410.047		1.53528e-10	395.182		1.53528e-08	254.023		1.53528e-07	308.118		1.53528e-06	176.114
							1.5495e-17	659.434	0.00015495	287.209		1.5495e-11	414.861		1.5495e-11	410.959		1.5495e-10	396.268		1.5495e-08	254.985		1.5495e-07	308.832		1.5495e-06	176.565
							1.56385e-17	660.881	0.000156385	287.997		1.56385e-11	415.928		1.56385e-11	411.873		1.56385e-10	397.357		1.56385e-08	255.949		1.56385e-07	309.548		1.56385e-06	177.018
							1.57833e-17	662.332	0.000157833	288.787		1.57833e-11	416.998		1.57833e-11	412.79		1.57833e-10	398.449		1.57833e-08	256.918		1.57833e-07	310.265		1.57833e-06	177.471
							1.59295e-17	663.786	0.000159295	289.58		1.59295e-11	418.07		1.59295e-11	413.708		1.59295e-10	399.544		1.59295e-08	257.89		1.59295e-07	310.984		1.59295e-06	177.926
							1.6077e-17	665.243	0.00016077	290.375		1.6077e-11	419.145		1.6077e-11	414.628		1.6077e-10	400.642		1.6077e-08	258.866		1.6077e-07	311.705		1.6077e-06	178.382
							1.6226e-17	666.704	0.00016226	291.172		1.6226e-11	420.223		1.6226e-11	415.55		1.6226e-10	401.744		1.6226e-08	259.846		1.6226e-07	312.427		1.6226e-06	178.839
							1.63762e-17	668.167	0.000163762	291.971		1.63762e-11	421.304		1.63762e-11	416.474		1.63762e-10	402.848		1.63762e-08	260.829		1.63762e-07	313.152		1.63762e-06	179.297
							1.65279e-17	669.634	0.000165279	292.772		1.65279e-11	422.388		1.65279e-11	417.401		1.65279e-10	403.955		1.65279e-08	261.816		1.65279e-07	313.877		1.65279e-06	179.756
							1.6681e-17	671.104	0.00016681	293.576		1.6681e-11	423.474		1.6681e-11	418.329		1.6681e-10	405.065		1.6681e-08	262.807		1.6681e-07	314.605		1.6681e-06	180.217
							1.68355e-17	672.577	0.000168355	294.382		1.68355e-11	424.563		1.68355e-11	419.26		1.68355e-10	406.178		1.68355e-08	263.802		1.68355e-07	315.334		1.68355e-06	180.678
							1.69914e-17	674.054	0.000169914	295.19		1.69914e-11	425.655		1.69914e-11	420.192		1.69914e-10	407.295		1.69914e-08	264.8		1.69914e-07	316.065		1.69914e-06	181.141
							1.71488e-17	675.534	0.000171488	296		1.71488e-11	426.75		1.71488e-11	421.127		1.71488e-10	408.414		1.71488e-08	265.802		1.71488e-07	316.797		1.71488e-06	181.605
							1.73077e-17	677.017	0.000173077	296.812		1.73077e-11	427.847		1.73077e-11	422.064		1.73077e-10	409.537		1.73077e-08	266.808		1.73077e-07	317.531		1.73077e-06	182.07
							1.7468e-17	678.503	0.00017468	297.627		1.7468e-11	428.948		1.7468e-11	423.002		1.7468e-10	410.662		1.7468e-08	267.817		1.7468e-07	318.267		1.7468e-06	182.537
							1.76298e-17	679.992	0.000176298	298.444		1.76298e-11	430.051		1.76298e-11	423.943		1.76298e-10	411.791		1.76298e-08	268.831		1.76298e-07	319.005		1.76298e-06	183.004
							1.7793e-17	681.485	0.00017793	299.263		1.7793e-11	431.157		1.7793e-11	424.886		1.7793e-10	412.923		1.7793e-08	269.848		1.7793e-07	319.744		1.7793e-06	183.473
							1.79578e-17	682.981	0.000179578	300.084		1.79578e-11	432.266		1.79578e-11	425.831		1.79578e-10	414.058		1.79578e-08	270.869		1.79578e-07	320.485		1.79578e-06	183.943
							1.81242e-17	684.481	0.000181242	300.908		1.81242e-11	433.377		1.81242e-11	426.779		1.81242e-10	415.195		1.81242e-08	271.894		1.81242e-07	321.228		1.81242e-06	184.415
							1.8292e-17	685.983	0.00018292	301.734		1.8292e-11	434.492		1.8292e-11	427.728		1.8292e-10	416.337		1.8292e-08	272.923		1.8292e-07	321.973		1.8292e-06	184.887
							1.84615e-17	687.489	0.000184615	302.562		1.84615e-11	435.609		1.84615e-11	428.679		1.84615e-10	417.481		1.84615e-08	273.956		1.84615e-07	322.719		1.84615e-06	185.361
							1.86325e-17	688.998	0.000186325	303.392		1.86325e-11	436.73		1.86325e-11	429.633		1.86325e-10	418.628		1.86325e-08	274.993		1.86325e-07	323.467		1.86325e-06	185.835
							1.8805e-17	690.511	0.00018805	304.225		1.8805e-11	437.853		1.8805e-11	430.588		1.8805e-10	419.779		1.8805e-08	276.034		1.8805e-07	324.217		1.8805e-06	186.312
							1.89792e-17	692.027	0.000189792	305.06		1.89792e-11	438.979		1.89792e-11	431.546		1.89792e-10	420.933		1.89792e-08	277.078		1.89792e-07	324.968		1.89792e-06	186.789
							1.9155e-17	693.546	0.00019155	305.897		1.9155e-11	440.108		1.9155e-11	432.506		1.9155e-10	422.089		1.9155e-08	278.127		1.9155e-07	325.721		1.9155e-06	187.267
							1.93324e-17	695.069	0.000193324	306.737		1.93324e-11	441.24		1.93324e-11	433.468		1.93324e-10	423.25		1.93324e-08	279.179		1.93324e-07	326.476		1.93324e-06	187.747
							1.95115e-17	696.594	0.000195115	307.579		1.95115e-11	442.375		1.95115e-11	434.432		1.95115e-10	424.413		1.95115e-08	280.236		1.95115e-07	327.233		1.95115e-06	188.228
							1.96922e-17	698.124	0.000196922	308.423		1.96922e-11	443.512		1.96922e-11	435.398		1.96922e-10	425.579		1.96922e-08	281.296		1.96922e-07	327.991		1.96922e-06	188.71
							1.98746e-17	699.656	0.000198746	309.27		1.98746e-11	444.653		1.98746e-11	436.367		1.98746e-10	426.749		1.98746e-08	282.361		1.98746e-07	328.751		1.98746e-06	189.194
							2.00587e-17	701.192	0.000200587	310.118		2.00587e-11	445.797		2.00587e-11	437.337		2.00587e-10	427.922		2.00587e-08	283.429		2.00587e-07	329.513		2.00587e-06	189.678
							2.02445e-17	702.731	0.000202445	310.97		2.02445e-11	446.943		2.02445e-11	438.31		2.02445e-10	429.098		2.02445e-08	284.502		2.02445e-07	330.277		2.02445e-06	190.164
							2.0432e-17	704.274	0.00020432	311.823		2.0432e-11	448.093		2.0432e-11	439.285		2.0432e-10	430.277		2.0432e-08	285.578		2.0432e-07	331.042		2.0432e-06	190.652
							2.06212e-17	705.82	0.000206212	312.679		2.06212e-11	449.245		2.06212e-11	440.262		2.06212e-10	431.46		2.06212e-08	286.659		2.06212e-07	331.81		2.06212e-06	191.14
							2.08122e-17	707.37	0.000208122	313.537		2.08122e-11	450.4		2.08122e-11	441.242		2.08122e-10	432.646		2.08122e-08	287.744		2.08122e-07	332.579		2.08122e-06	191.63
							2.1005e-17	708.923	0.00021005	314.398		2.1005e-11	451.559		2.1005e-11	442.223		2.1005e-10	433.835		2.1005e-08	288.833		2.1005e-07	333.349		2.1005e-06	192.121
							2.11995e-17	710.479	0.000211995	315.261		2.11995e-11	452.72		2.11995e-11	443.207		2.11995e-10	435.027		2.11995e-08	289.926		2.11995e-07	334.122		2.11995e-06	192.613
							2.13959e-17	712.039	0.000213959	316.126		2.13959e-11	453.884		2.13959e-11	444.192		2.13959e-10	436.223		2.13959e-08	291.023		2.13959e-07	334.896		2.13959e-06	193.106
							2.15941e-17	713.602	0.000215941	316.994		2.15941e-11	455.052		2.15941e-11	445.18		2.15941e-10	437.422		2.15941e-08	292.124		2.15941e-07	335.672		2.15941e-06	193.601
							2.17941e-17	715.168	0.000217941	317.864		2.17941e-11	456.222		2.17941e-11	446.171		2.17941e-10	438.624		2.17941e-08	293.23		2.17941e-07	336.45		2.17941e-06	194.097
							2.19959e-17	716.738	0.000219959	318.736		2.19959e-11	457.395		2.19959e-11	447.163		2.19959e-10	439.829		2.19959e-08	294.339		2.19959e-07	337.23		2.19959e-06	194.594
							2.21997e-17	718.312	0.000221997	319.611		2.21997e-11	458.572		2.21997e-11	448.158		2.21997e-10	441.038		2.21997e-08	295.453		2.21997e-07	338.012		2.21997e-06	195.093
							2.24053e-17	719.889	0.000224053	320.488		2.24053e-11	459.751		2.24053e-11	449.154		2.24053e-10	442.25		2.24053e-08	296.571		2.24053e-07	338.795		2.24053e-06	195.592
							2.26128e-17	721.469	0.000226128	321.368		2.26128e-11	460.933		2.26128e-11	450.154		2.26128e-10	443.466		2.26128e-08	297.694		2.26128e-07	339.58		2.26128e-06	196.094
							2.28222e-17	723.053	0.000228222	322.25		2.28222e-11	462.119		2.28222e-11	451.155		2.28222e-10	444.685		2.28222e-08	298.82		2.28222e-07	340.367		2.28222e-06	196.596
							2.30336e-17	724.64	0.000230336	323.134		2.30336e-11	463.307		2.30336e-11	452.158		2.30336e-10	445.907		2.30336e-08	299.951		2.30336e-07	341.156		2.30336e-06	197.1
							2.3247e-17	726.231	0.00023247	324.021		2.3247e-11	464.499		2.3247e-11	453.164		2.3247e-10	447.132		2.3247e-08	301.086		2.3247e-07	341.947		2.3247e-06	197.604
							2.34623e-17	727.825	0.000234623	324.91		2.34623e-11	465.694		2.34623e-11	454.172		2.34623e-10	448.361		2.34623e-08	302.226		2.34623e-07	342.739		2.34623e-06	198.111
							2.36796e-17	729.423	0.000236796	325.802		2.36796e-11	466.891		2.36796e-11	455.182		2.36796e-10	449.593		2.36796e-08	303.369		2.36796e-07	343.534		2.36796e-06	198.618
							2.38989e-17	731.024	0.000238989	326.696		2.38989e-11	468.092		2.38989e-11	456.195		2.38989e-10	450.829		2.38989e-08	304.517		2.38989e-07	344.33		2.38989e-06	199.127
							2.41203e-17	732.629	0.000241203	327.593		2.41203e-11	469.296		2.41203e-11	457.209		2.41203e-10	452.068		2.41203e-08	305.67		2.41203e-07	345.128		2.41203e-06	199.637
							2.43437e-17	734.238	0.000243437	328.492		2.43437e-11	470.503		2.43437e-11	458.226		2.43437e-10	453.311		2.43437e-08	306.826		2.43437e-07	345.928		2.43437e-06	200.149
							2.45692e-17	735.849	0.000245692	329.394		2.45692e-11	471.713		2.45692e-11	459.246		2.45692e-10	454.556		2.45692e-08	307.987		2.45692e-07	346.73		2.45692e-06	200.661
							2.47967e-17	737.465	0.000247967	330.298		2.47967e-11	472.926		2.47967e-11	460.267		2.47967e-10	455.806		2.47967e-08	309.153		2.47967e-07	347.533		2.47967e-06	201.175
							2.50264e-17	739.084	0.000250264	331.204		2.50264e-11	474.142		2.50264e-11	461.291		2.50264e-10	457.058		2.50264e-08	310.323		2.50264e-07	348.339		2.50264e-06	201.691
							2.52582e-17	740.706	0.000252582	332.114		2.52582e-11	475.362		2.52582e-11	462.317		2.52582e-10	458.315		2.52582e-08	311.497		2.52582e-07	349.146		2.52582e-06	202.208
							2.54921e-17	742.332	0.000254921	333.025		2.54921e-11	476.584		2.54921e-11	463.345		2.54921e-10	459.574		2.54921e-08	312.676		2.54921e-07	349.955		2.54921e-06	202.726
							2.57283e-17	743.962	0.000257283	333.939		2.57283e-11	477.81		2.57283e-11	464.376		2.57283e-10	460.837		2.57283e-08	313.859		2.57283e-07	350.766		2.57283e-06	203.245
							2.59666e-17	745.595	0.000259666	334.856		2.59666e-11	479.039		2.59666e-11	465.409		2.59666e-10	462.104		2.59666e-08	315.047		2.59666e-07	351.579		2.59666e-06	203.766
							2.62071e-17	747.232	0.000262071	335.775		2.62071e-11	480.271		2.62071e-11	466.444		2.62071e-10	463.374		2.62071e-08	316.239		2.62071e-07	352.394		2.62071e-06	204.288
							2.64498e-17	748.872	0.000264498	336.696		2.64498e-11	481.506		2.64498e-11	467.481		2.64498e-10	464.648		2.64498e-08	317.436		2.64498e-07	353.211		2.64498e-06	204.811
							2.66948e-17	750.516	0.000266948	337.62		2.66948e-11	482.744		2.66948e-11	468.521		2.66948e-10	465.925		2.66948e-08	318.637		2.66948e-07	354.029		2.66948e-06	205.336
							2.6942e-17	752.164	0.00026942	338.547		2.6942e-11	483.986		2.6942e-11	469.563		2.6942e-10	467.205		2.6942e-08	319.843		2.6942e-07	354.85		2.6942e-06	205.862
							2.71916e-17	753.815	0.000271916	339.476		2.71916e-11	485.231		2.71916e-11	470.608		2.71916e-10	468.489		2.71916e-08	321.053		2.71916e-07	355.672		2.71916e-06	206.389
							2.74434e-17	755.47	0.000274434	340.408		2.74434e-11	486.479		2.74434e-11	471.655		2.74434e-10	469.777		2.74434e-08	322.268		2.74434e-07	356.497		2.74434e-06	206.918
							2.76976e-17	757.128	0.000276976	341.342		2.76976e-11	487.73		2.76976e-11	472.704		2.76976e-10	471.068		2.76976e-08	323.488		2.76976e-07	357.323		2.76976e-06	207.448
							2.79542e-17	758.791	0.000279542	342.279		2.79542e-11	488.984		2.79542e-11	473.755		2.79542e-10	472.363		2.79542e-08	324.712		2.79542e-07	358.151		2.79542e-06	207.979
							2.82131e-17	760.456	0.000282131	343.219		2.82131e-11	490.242		2.82131e-11	474.809		2.82131e-10	473.661		2.82131e-08	325.941		2.82131e-07	358.981		2.82131e-06	208.512
							2.84744e-17	762.126	0.000284744	344.161		2.84744e-11	491.502		2.84744e-11	475.865		2.84744e-10	474.963		2.84744e-08	327.174		2.84744e-07	359.813		2.84744e-06	209.046
							2.87381e-17	763.799	0.000287381	345.105		2.87381e-11	492.766		2.87381e-11	476.923		2.87381e-10	476.268		2.87381e-08	328.412		2.87381e-07	360.647		2.87381e-06	209.582
							2.90043e-17	765.476	0.000290043	346.053		2.90043e-11	494.034		2.90043e-11	477.984		2.90043e-10	477.577		2.90043e-08	329.655		2.90043e-07	361.483		2.90043e-06	210.119
							2.92729e-17	767.156	0.000292729	347.002		2.92729e-11	495.304		2.92729e-11	479.047		2.92729e-10	478.89		2.92729e-08	330.903		2.92729e-07	362.321		2.92729e-06	210.657
							2.95441e-17	768.84	0.000295441	347.955		2.95441e-11	496.578		2.95441e-11	480.113		2.95441e-10	480.206		2.95441e-08	332.155		2.95441e-07	363.16		2.95441e-06	211.197
							2.98177e-17	770.528	0.000298177	348.91		2.98177e-11	497.855		2.98177e-11	481.181		2.98177e-10	481.526		2.98177e-08	333.412		2.98177e-07	364.002		2.98177e-06	211.738
							3.00939e-17	772.22	0.000300939	349.867		3.00939e-11	499.136		3.00939e-11	482.251		3.00939e-10	482.849		3.00939e-08	334.674		3.00939e-07	364.846		3.00939e-06	212.28
							3.03726e-17	773.915	0.000303726	350.828		3.03726e-11	500.419		3.03726e-11	483.324		3.03726e-10	484.176		3.03726e-08	335.94		3.03726e-07	365.691		3.03726e-06	212.824
							3.0654e-17	775.614	0.00030654	351.791		3.0654e-11	501.706		3.0654e-11	484.399		3.0654e-10	485.507		3.0654e-08	337.211		3.0654e-07	366.539		3.0654e-06	213.369
							3.09379e-17	777.316	0.000309379	352.756		3.09379e-11	502.997		3.09379e-11	485.476		3.09379e-10	486.841		3.09379e-08	338.488		3.09379e-07	367.388		3.09379e-06	213.916
							3.12244e-17	779.023	0.000312244	353.724		3.12244e-11	504.29		3.12244e-11	486.556		3.12244e-10	488.179		3.12244e-08	339.768		3.12244e-07	368.24		3.12244e-06	214.464
							3.15136e-17	780.733	0.000315136	354.695		3.15136e-11	505.587		3.15136e-11	487.638		3.15136e-10	489.521		3.15136e-08	341.054		3.15136e-07	369.093		3.15136e-06	215.013
							3.18055e-17	782.447	0.000318055	355.669		3.18055e-11	506.888		3.18055e-11	488.723		3.18055e-10	490.866		3.18055e-08	342.345		3.18055e-07	369.949		3.18055e-06	215.564
							3.21001e-17	784.165	0.000321001	356.645		3.21001e-11	508.191		3.21001e-11	489.81		3.21001e-10	492.215		3.21001e-08	343.64		3.21001e-07	370.806		3.21001e-06	216.116
							3.23974e-17	785.886	0.000323974	357.624		3.23974e-11	509.498		3.23974e-11	490.9		3.23974e-10	493.568		3.23974e-08	344.941		3.23974e-07	371.665		3.23974e-06	216.67
							3.26975e-17	787.611	0.000326975	358.605		3.26975e-11	510.809		3.26975e-11	491.991		3.26975e-10	494.925		3.26975e-08	346.246		3.26975e-07	372.527		3.26975e-06	217.225
							3.30003e-17	789.34	0.000330003	359.59		3.30003e-11	512.122		3.30003e-11	493.086		3.30003e-10	496.285		3.30003e-08	347.556		3.30003e-07	373.39		3.30003e-06	217.782
							3.3306e-17	791.073	0.00033306	360.577		3.3306e-11	513.439		3.3306e-11	494.183		3.3306e-10	497.649		3.3306e-08	348.872		3.3306e-07	374.255		3.3306e-06	218.34
							3.36145e-17	792.81	0.000336145	361.566		3.36145e-11	514.76		3.36145e-11	495.282		3.36145e-10	499.017		3.36145e-08	350.192		3.36145e-07	375.123		3.36145e-06	218.899
							3.39258e-17	794.55	0.000339258	362.559		3.39258e-11	516.084		3.39258e-11	496.383		3.39258e-10	500.388		3.39258e-08	351.517		3.39258e-07	375.992		3.39258e-06	219.46
							3.42401e-17	796.295	0.000342401	363.554		3.42401e-11	517.411		3.42401e-11	497.487		3.42401e-10	501.763		3.42401e-08	352.847		3.42401e-07	376.864		3.42401e-06	220.022
							3.45572e-17	798.043	0.000345572	364.552		3.45572e-11	518.742		3.45572e-11	498.594		3.45572e-10	503.142		3.45572e-08	354.183		3.45572e-07	377.737		3.45572e-06	220.586
							3.48773e-17	799.795	0.000348773	365.552		3.48773e-11	520.076		3.48773e-11	499.703		3.48773e-10	504.525		3.48773e-08	355.523		3.48773e-07	378.613		3.48773e-06	221.151
							3.52003e-17	801.55	0.000352003	366.555		3.52003e-11	521.413		3.52003e-11	500.815		3.52003e-10	505.912		3.52003e-08	356.868		3.52003e-07	379.49		3.52003e-06	221.717
							3.55263e-17	803.31	0.000355263	367.561		3.55263e-11	522.754		3.55263e-11	501.928		3.55263e-10	507.302		3.55263e-08	358.219		3.55263e-07	380.37		3.55263e-06	222.285
							3.58554e-17	805.074	0.000358554	368.57		3.58554e-11	524.099		3.58554e-11	503.045		3.58554e-10	508.697		3.58554e-08	359.574		3.58554e-07	381.251		3.58554e-06	222.855
							3.61875e-17	806.841	0.000361875	369.582		3.61875e-11	525.447		3.61875e-11	504.164		3.61875e-10	510.095		3.61875e-08	360.935		3.61875e-07	382.135		3.61875e-06	223.426
							3.65227e-17	808.612	0.000365227	370.596		3.65227e-11	526.798		3.65227e-11	505.285		3.65227e-10	511.497		3.65227e-08	362.301		3.65227e-07	383.02		3.65227e-06	223.998
							3.6861e-17	810.387	0.00036861	371.613		3.6861e-11	528.153		3.6861e-11	506.409		3.6861e-10	512.902		3.6861e-08	363.672		3.6861e-07	383.908		3.6861e-06	224.572
							3.72024e-17	812.166	0.000372024	372.633		3.72024e-11	529.511		3.72024e-11	507.536		3.72024e-10	514.312		3.72024e-08	365.048		3.72024e-07	384.798		3.72024e-06	225.147
							3.75469e-17	813.949	0.000375469	373.656		3.75469e-11	530.873		3.75469e-11	508.664		3.75469e-10	515.726		3.75469e-08	366.43		3.75469e-07	385.69		3.75469e-06	225.724
							3.78947e-17	815.736	0.000378947	374.682		3.78947e-11	532.238		3.78947e-11	509.796		3.78947e-10	517.143		3.78947e-08	367.816		3.78947e-07	386.584		3.78947e-06	226.302
							3.82457e-17	817.527	0.000382457	375.71		3.82457e-11	533.607		3.82457e-11	510.93		3.82457e-10	518.564		3.82457e-08	369.208		3.82457e-07	387.479		3.82457e-06	226.882
							3.85999e-17	819.322	0.000385999	376.741		3.85999e-11	534.979		3.85999e-11	512.066		3.85999e-10	519.99		3.85999e-08	370.605		3.85999e-07	388.378		3.85999e-06	227.463
							3.89575e-17	821.12	0.000389575	377.775		3.89575e-11	536.355		3.89575e-11	513.205		3.89575e-10	521.419		3.89575e-08	372.008		3.89575e-07	389.278		3.89575e-06	228.046
							3.93183e-17	822.923	0.000393183	378.812		3.93183e-11	537.735		3.93183e-11	514.347		3.93183e-10	522.852		3.93183e-08	373.416		3.93183e-07	390.18		3.93183e-06	228.63
							3.96825e-17	824.729	0.000396825	379.852		3.96825e-11	539.118		3.96825e-11	515.491		3.96825e-10	524.289		3.96825e-08	374.829		3.96825e-07	391.084		3.96825e-06	229.216
							4.005e-17	826.54	0.0004005	380.895		4.005e-11	540.504		4.005e-11	516.637		4.005e-10	525.73		4.005e-08	376.247		4.005e-07	391.991		4.005e-06	229.803
							4.0421e-17	828.354	0.00040421	381.94		4.0421e-11	541.894		4.0421e-11	517.787		4.0421e-10	527.175		4.0421e-08	377.671		4.0421e-07	392.899		4.0421e-06	230.392
							4.07953e-17	830.173	0.000407953	382.988		4.07953e-11	543.288		4.07953e-11	518.938		4.07953e-10	528.623		4.07953e-08	379.1		4.07953e-07	393.81		4.07953e-06	230.982
							4.11732e-17	831.995	0.000411732	384.039		4.11732e-11	544.685		4.11732e-11	520.092		4.11732e-10	530.076		4.11732e-08	380.535		4.11732e-07	394.722		4.11732e-06	231.574
							4.15546e-17	833.822	0.000415546	385.093		4.15546e-11	546.086		4.15546e-11	521.249		4.15546e-10	531.533		4.15546e-08	381.975		4.15546e-07	395.637		4.15546e-06	232.167
							4.19394e-17	835.652	0.000419394	386.15		4.19394e-11	547.49		4.19394e-11	522.409		4.19394e-10	532.994		4.19394e-08	383.42		4.19394e-07	396.554		4.19394e-06	232.762
							4.23279e-17	837.487	0.000423279	387.21		4.23279e-11	548.899		4.23279e-11	523.571		4.23279e-10	534.459		4.23279e-08	384.871		4.23279e-07	397.473		4.23279e-06	233.358
							4.27199e-17	839.325	0.000427199	388.273		4.27199e-11	550.31		4.27199e-11	524.735		4.27199e-10	535.928		4.27199e-08	386.328		4.27199e-07	398.394		4.27199e-06	233.956
							4.31156e-17	841.168	0.000431156	389.339		4.31156e-11	551.725		4.31156e-11	525.902		4.31156e-10	537.401		4.31156e-08	387.79		4.31156e-07	399.318		4.31156e-06	234.555
							4.3515e-17	843.015	0.00043515	390.407		4.3515e-11	553.144		4.3515e-11	527.072		4.3515e-10	538.878		4.3515e-08	389.257		4.3515e-07	400.243		4.3515e-06	235.156
							4.3918e-17	844.865	0.00043918	391.479		4.3918e-11	554.567		4.3918e-11	528.245		4.3918e-10	540.359		4.3918e-08	390.73		4.3918e-07	401.171		4.3918e-06	235.759
							4.43248e-17	846.72	0.000443248	392.553		4.43248e-11	555.993		4.43248e-11	529.42		4.43248e-10	541.844		4.43248e-08	392.209		4.43248e-07	402.101		4.43248e-06	236.363
							4.47353e-17	848.579	0.000447353	393.631		4.47353e-11	557.423		4.47353e-11	530.597		4.47353e-10	543.333		4.47353e-08	393.693		4.47353e-07	403.032		4.47353e-06	236.968
							4.51497e-17	850.442	0.000451497	394.711		4.51497e-11	558.857		4.51497e-11	531.777		4.51497e-10	544.826		4.51497e-08	395.183		4.51497e-07	403.967		4.51497e-06	237.575
							4.55679e-17	852.309	0.000455679	395.795		4.55679e-11	560.294		4.55679e-11	532.96		4.55679e-10	546.324		4.55679e-08	396.679		4.55679e-07	404.903		4.55679e-06	238.184
							4.59899e-17	854.18	0.000459899	396.881		4.59899e-11	561.735		4.59899e-11	534.146		4.59899e-10	547.825		4.59899e-08	398.18		4.59899e-07	405.841		4.59899e-06	238.794
							4.64159e-17	856.055	0.000464159	397.97		4.64159e-11	563.18		4.64159e-11	535.334		4.64159e-10	549.331		4.64159e-08	399.687		4.64159e-07	406.782		4.64159e-06	239.406
							4.68458e-17	857.934	0.000468458	399.062		4.68458e-11	564.628		4.68458e-11	536.524		4.68458e-10	550.841		4.68458e-08	401.199		4.68458e-07	407.725		4.68458e-06	240.019
							4.72797e-17	859.818	0.000472797	400.158		4.72797e-11	566.08		4.72797e-11	537.718		4.72797e-10	552.355		4.72797e-08	402.717		4.72797e-07	408.669		4.72797e-06	240.634
							4.77176e-17	861.705	0.000477176	401.256		4.77176e-11	567.536		4.77176e-11	538.914		4.77176e-10	553.873		4.77176e-08	404.241		4.77176e-07	409.617		4.77176e-06	241.251
							4.81596e-17	863.597	0.000481596	402.357		4.81596e-11	568.996		4.81596e-11	540.113		4.81596e-10	555.395		4.81596e-08	405.771		4.81596e-07	410.566		4.81596e-06	241.869
							4.86056e-17	865.493	0.000486056	403.462		4.86056e-11	570.459		4.86056e-11	541.314		4.86056e-10	556.922		4.86056e-08	407.307		4.86056e-07	411.518		4.86056e-06	242.488
							4.90558e-17	867.393	0.000490558	404.569		4.90558e-11	571.926		4.90558e-11	542.518		4.90558e-10	558.452		4.90558e-08	408.848		4.90558e-07	412.471		4.90558e-06	243.109
							4.95102e-17	869.297	0.000495102	405.68		4.95102e-11	573.397		4.95102e-11	543.725		4.95102e-10	559.987		4.95102e-08	410.395		4.95102e-07	413.427		4.95102e-06	243.732
							4.99688e-17	871.205	0.000499688	406.793		4.99688e-11	574.872		4.99688e-11	544.934		4.99688e-10	561.526		4.99688e-08	411.948		4.99688e-07	414.385		4.99688e-06	244.357
							5.04316e-17	873.118	0.000504316	407.909		5.04316e-11	576.35		5.04316e-11	546.146		5.04316e-10	563.069		5.04316e-08	413.507		5.04316e-07	415.346		5.04316e-06	244.983
							5.08987e-17	875.034	0.000508987	409.029		5.08987e-11	577.833		5.08987e-11	547.361		5.08987e-10	564.617		5.08987e-08	415.072		5.08987e-07	416.308		5.08987e-06	245.61
							5.13701e-17	876.955	0.000513701	410.152		5.13701e-11	579.319		5.13701e-11	548.578		5.13701e-10	566.169		5.13701e-08	416.643		5.13701e-07	417.273		5.13701e-06	246.239
							5.18459e-17	878.881	0.000518459	411.277		5.18459e-11	580.809		5.18459e-11	549.799		5.18459e-10	567.725		5.18459e-08	418.219		5.18459e-07	418.24		5.18459e-06	246.87
							5.23261e-17	880.81	0.000523261	412.406		5.23261e-11	582.302		5.23261e-11	551.021		5.23261e-10	569.285		5.23261e-08	419.802		5.23261e-07	419.21		5.23261e-06	247.503
							5.28108e-17	882.744	0.000528108	413.538		5.28108e-11	583.8		5.28108e-11	552.247		5.28108e-10	570.85		5.28108e-08	421.391		5.28108e-07	420.181		5.28108e-06	248.137
							5.32999e-17	884.681	0.000532999	414.673		5.32999e-11	585.301		5.32999e-11	553.475		5.32999e-10	572.419		5.32999e-08	422.985		5.32999e-07	421.155		5.32999e-06	248.773
							5.37936e-17	886.624	0.000537936	415.811		5.37936e-11	586.807		5.37936e-11	554.707		5.37936e-10	573.992		5.37936e-08	424.586		5.37936e-07	422.131		5.37936e-06	249.41
							5.42919e-17	888.57	0.000542919	416.953		5.42919e-11	588.316		5.42919e-11	555.94		5.42919e-10	575.569		5.42919e-08	426.193		5.42919e-07	423.11		5.42919e-06	250.049
							5.47947e-17	890.521	0.000547947	418.097		5.47947e-11	589.829		5.47947e-11	557.177		5.47947e-10	577.151		5.47947e-08	427.806		5.47947e-07	424.09		5.47947e-06	250.689
							5.53022e-17	892.476	0.000553022	419.245		5.53022e-11	591.346		5.53022e-11	558.416		5.53022e-10	578.738		5.53022e-08	429.424		5.53022e-07	425.073		5.53022e-06	251.332
							5.58145e-17	894.435	0.000558145	420.395		5.58145e-11	592.867		5.58145e-11	559.658		5.58145e-10	580.328		5.58145e-08	431.05		5.58145e-07	426.058		5.58145e-06	251.975
							5.63314e-17	896.398	0.000563314	421.549		5.63314e-11	594.391		5.63314e-11	560.903		5.63314e-10	581.923		5.63314e-08	432.681		5.63314e-07	427.046		5.63314e-06	252.621
							5.68532e-17	898.366	0.000568532	422.706		5.68532e-11	595.92		5.68532e-11	562.151		5.68532e-10	583.522		5.68532e-08	434.318		5.68532e-07	428.035		5.68532e-06	253.268
							5.73798e-17	900.338	0.000573798	423.866		5.73798e-11	597.453		5.73798e-11	563.401		5.73798e-10	585.126		5.73798e-08	435.962		5.73798e-07	429.027		5.73798e-06	253.917
							5.79112e-17	902.315	0.000579112	425.03		5.79112e-11	598.989		5.79112e-11	564.654		5.79112e-10	586.734		5.79112e-08	437.611		5.79112e-07	430.022		5.79112e-06	254.567
							5.84476e-17	904.296	0.000584476	426.196		5.84476e-11	600.53		5.84476e-11	565.91		5.84476e-10	588.347		5.84476e-08	439.268		5.84476e-07	431.018		5.84476e-06	255.22
							5.8989e-17	906.281	0.00058989	427.366		5.8989e-11	602.074		5.8989e-11	567.169		5.8989e-10	589.964		5.8989e-08	440.93		5.8989e-07	432.017		5.8989e-06	255.873
							5.95353e-17	908.271	0.000595353	428.539		5.95353e-11	603.623		5.95353e-11	568.431		5.95353e-10	591.585		5.95353e-08	442.598		5.95353e-07	433.019		5.95353e-06	256.529
							6.00868e-17	910.264	0.000600868	429.715		6.00868e-11	605.175		6.00868e-11	569.695		6.00868e-10	593.211		6.00868e-08	444.273		6.00868e-07	434.022		6.00868e-06	257.186
							6.06433e-17	912.263	0.000606433	430.895		6.06433e-11	606.731		6.06433e-11	570.962		6.06433e-10	594.842		6.06433e-08	445.955		6.06433e-07	435.028		6.06433e-06	257.845
							6.1205e-17	914.265	0.00061205	432.077		6.1205e-11	608.292		6.1205e-11	572.232		6.1205e-10	596.477		6.1205e-08	447.642		6.1205e-07	436.036		6.1205e-06	258.506
							6.17719e-17	916.272	0.000617719	433.263		6.17719e-11	609.856		6.17719e-11	573.505		6.17719e-10	598.116		6.17719e-08	449.336		6.17719e-07	437.047		6.17719e-06	259.168
							6.2344e-17	918.284	0.00062344	434.452		6.2344e-11	611.425		6.2344e-11	574.781		6.2344e-10	599.76		6.2344e-08	451.037		6.2344e-07	438.06		6.2344e-06	259.832
							6.29215e-17	920.3	0.000629215	435.645		6.29215e-11	612.997		6.29215e-11	576.059		6.29215e-10	601.408		6.29215e-08	452.743		6.29215e-07	439.075		6.29215e-06	260.497
							6.35043e-17	922.32	0.000635043	436.841		6.35043e-11	614.574		6.35043e-11	577.34		6.35043e-10	603.061		6.35043e-08	454.457		6.35043e-07	440.093		6.35043e-06	261.165
							6.40924e-17	924.345	0.000640924	438.039		6.40924e-11	616.154		6.40924e-11	578.624		6.40924e-10	604.718		6.40924e-08	456.177		6.40924e-07	441.113		6.40924e-06	261.834
							6.46861e-17	926.374	0.000646861	439.242		6.46861e-11	617.739		6.46861e-11	579.912		6.46861e-10	606.381		6.46861e-08	457.903		6.46861e-07	442.135		6.46861e-06	262.505
							6.52852e-17	928.408	0.000652852	440.447		6.52852e-11	619.328		6.52852e-11	581.201		6.52852e-10	608.047		6.52852e-08	459.636		6.52852e-07	443.16		6.52852e-06	263.177
							6.58899e-17	930.446	0.000658899	441.656		6.58899e-11	620.92		6.58899e-11	582.494		6.58899e-10	609.718		6.58899e-08	461.375		6.58899e-07	444.187		6.58899e-06	263.851
							6.65002e-17	932.489	0.000665002	442.868		6.65002e-11	622.517		6.65002e-11	583.79		6.65002e-10	611.394		6.65002e-08	463.121		6.65002e-07	445.216		6.65002e-06	264.527
							6.71161e-17	934.536	0.000671161	444.084		6.71161e-11	624.118		6.71161e-11	585.088		6.71161e-10	613.074		6.71161e-08	464.874		6.71161e-07	446.248		6.71161e-06	265.205
							6.77378e-17	936.587	0.000677378	445.303		6.77378e-11	625.723		6.77378e-11	586.39		6.77378e-10	614.759		6.77378e-08	466.633		6.77378e-07	447.282		6.77378e-06	265.884
							6.83652e-17	938.643	0.000683652	446.525		6.83652e-11	627.333		6.83652e-11	587.694		6.83652e-10	616.449		6.83652e-08	468.399		6.83652e-07	448.319		6.83652e-06	266.566
							6.89984e-17	940.704	0.000689984	447.751		6.89984e-11	628.946		6.89984e-11	589.001		6.89984e-10	618.143		6.89984e-08	470.171		6.89984e-07	449.358		6.89984e-06	267.248
							6.96374e-17	942.769	0.000696374	448.98		6.96374e-11	630.564		6.96374e-11	590.311		6.96374e-10	619.842		6.96374e-08	471.95		6.96374e-07	450.399		6.96374e-06	267.933
							7.02824e-17	944.839	0.000702824	450.212		7.02824e-11	632.185		7.02824e-11	591.624		7.02824e-10	621.546		7.02824e-08	473.736		7.02824e-07	451.443		7.02824e-06	268.62
							7.09334e-17	946.913	0.000709334	451.448		7.09334e-11	633.811		7.09334e-11	592.94		7.09334e-10	623.254		7.09334e-08	475.529		7.09334e-07	452.49		7.09334e-06	269.308
							7.15904e-17	948.992	0.000715904	452.687		7.15904e-11	635.441		7.15904e-11	594.259		7.15904e-10	624.967		7.15904e-08	477.329		7.15904e-07	453.538		7.15904e-06	269.998
							7.22535e-17	951.075	0.000722535	453.929		7.22535e-11	637.076		7.22535e-11	595.581		7.22535e-10	626.684		7.22535e-08	479.135		7.22535e-07	454.589		7.22535e-06	270.689
							7.29227e-17	953.163	0.000729227	455.175		7.29227e-11	638.714		7.29227e-11	596.906		7.29227e-10	628.407		7.29227e-08	480.948		7.29227e-07	455.643		7.29227e-06	271.383
							7.35981e-17	955.255	0.000735981	456.424		7.35981e-11	640.357		7.35981e-11	598.233		7.35981e-10	630.134		7.35981e-08	482.768		7.35981e-07	456.699		7.35981e-06	272.078
							7.42798e-17	957.352	0.000742798	457.677		7.42798e-11	642.004		7.42798e-11	599.564		7.42798e-10	631.866		7.42798e-08	484.595		7.42798e-07	457.757		7.42798e-06	272.775
							7.49678e-17	959.454	0.000749678	458.933		7.49678e-11	643.655		7.49678e-11	600.898		7.49678e-10	633.602		7.49678e-08	486.429		7.49678e-07	458.818		7.49678e-06	273.474
							7.56622e-17	961.56	0.000756622	460.193		7.56622e-11	645.31		7.56622e-11	602.234		7.56622e-10	635.344		7.56622e-08	488.27		7.56622e-07	459.882		7.56622e-06	274.174
							7.6363e-17	963.671	0.00076363	461.456		7.6363e-11	646.97		7.6363e-11	603.574		7.6363e-10	637.09		7.6363e-08	490.117		7.6363e-07	460.948		7.6363e-06	274.877
							7.70703e-17	965.787	0.000770703	462.722		7.70703e-11	648.634		7.70703e-11	604.916		7.70703e-10	638.841		7.70703e-08	491.972		7.70703e-07	462.016		7.70703e-06	275.581
							7.77841e-17	967.907	0.000777841	463.992		7.77841e-11	650.302		7.77841e-11	606.262		7.77841e-10	640.597		7.77841e-08	493.834		7.77841e-07	463.087		7.77841e-06	276.287
							7.85046e-17	970.032	0.000785046	465.266		7.85046e-11	651.974		7.85046e-11	607.61		7.85046e-10	642.357		7.85046e-08	495.703		7.85046e-07	464.16		7.85046e-06	276.995
							7.92317e-17	972.161	0.000792317	466.543		7.92317e-11	653.651		7.92317e-11	608.962		7.92317e-10	644.123		7.92317e-08	497.579		7.92317e-07	465.236		7.92317e-06	277.704
							7.99655e-17	974.295	0.000799655	467.823		7.99655e-11	655.332		7.99655e-11	610.316		7.99655e-10	645.893		7.99655e-08	499.462		7.99655e-07	466.314		7.99655e-06	278.416
							8.07062e-17	976.434	0.000807062	469.107		8.07062e-11	657.017		8.07062e-11	611.674		8.07062e-10	647.668		8.07062e-08	501.352		8.07062e-07	467.395		8.07062e-06	279.129
							8.14537e-17	978.578	0.000814537	470.395		8.14537e-11	658.707		8.14537e-11	613.034		8.14537e-10	649.448		8.14537e-08	503.249		8.14537e-07	468.478		8.14537e-06	279.844
							8.22082e-17	980.726	0.000822082	471.686		8.22082e-11	660.401		8.22082e-11	614.398		8.22082e-10	651.233		8.22082e-08	505.153		8.22082e-07	469.564		8.22082e-06	280.561
							8.29696e-17	982.879	0.000829696	472.981		8.29696e-11	662.1		8.29696e-11	615.764		8.29696e-10	653.023		8.29696e-08	507.065		8.29696e-07	470.652		8.29696e-06	281.28
							8.37381e-17	985.037	0.000837381	474.279		8.37381e-11	663.803		8.37381e-11	617.134		8.37381e-10	654.818		8.37381e-08	508.984		8.37381e-07	471.743		8.37381e-06	282
							8.45137e-17	987.199	0.000845137	475.581		8.45137e-11	665.51		8.45137e-11	618.507		8.45137e-10	656.618		8.45137e-08	510.91		8.45137e-07	472.836		8.45137e-06	282.723
							8.52964e-17	989.366	0.000852964	476.886		8.52964e-11	667.221		8.52964e-11	619.883		8.52964e-10	658.422		8.52964e-08	512.843		8.52964e-07	473.932		8.52964e-06	283.447
							8.60865e-17	991.538	0.000860865	478.195		8.60865e-11	668.937		8.60865e-11	621.261		8.60865e-10	660.232		8.60865e-08	514.784		8.60865e-07	475.03		8.60865e-06	284.173
							8.68838e-17	993.715	0.000868838	479.507		8.68838e-11	670.658		8.68838e-11	622.643		8.68838e-10	662.046		8.68838e-08	516.732		8.68838e-07	476.131		8.68838e-06	284.901
							8.76886e-17	995.897	0.000876886	480.823		8.76886e-11	672.382		8.76886e-11	624.028		8.76886e-10	663.866		8.76886e-08	518.688		8.76886e-07	477.235		8.76886e-06	285.631
							8.85007e-17	998.083	0.000885007	482.143		8.85007e-11	674.112		8.85007e-11	625.416		8.85007e-10	665.691		8.85007e-08	520.651		8.85007e-07	478.341		8.85007e-06	286.363
							8.93205e-17	1000.27	0.000893205	483.466		8.93205e-11	675.845		8.93205e-11	626.807		8.93205e-10	667.52		8.93205e-08	522.621		8.93205e-07	479.449		8.93205e-06	287.097
							9.01478e-17	1002.47	0.000901478	484.793		9.01478e-11	677.584		9.01478e-11	628.201		9.01478e-10	669.355		9.01478e-08	524.599		9.01478e-07	480.561		9.01478e-06	287.832
							9.09827e-17	1004.67	0.000909827	486.124		9.09827e-11	679.326		9.09827e-11	629.599		9.09827e-10	671.194		9.09827e-08	526.584		9.09827e-07	481.674		9.09827e-06	288.569
							9.18254e-17	1006.88	0.000918254	487.458		9.18254e-11	681.073		9.18254e-11	630.999		9.18254e-10	673.039		9.18254e-08	528.577		9.18254e-07	482.791		9.18254e-06	289.309
							9.26759e-17	1009.09	0.000926759	488.796		9.26759e-11	682.825		9.26759e-11	632.403		9.26759e-10	674.889		9.26759e-08	530.577		9.26759e-07	483.91		9.26759e-06	290.05
							9.35343e-17	1011.3	0.000935343	490.138		9.35343e-11	684.581		9.35343e-11	633.809		9.35343e-10	676.744		9.35343e-08	532.585		9.35343e-07	485.031		9.35343e-06	290.793
							9.44006e-17	1013.52	0.000944006	491.483		9.44006e-11	686.342		9.44006e-11	635.219		9.44006e-10	678.604		9.44006e-08	534.6		9.44006e-07	486.155		9.44006e-06	291.538
							9.5275e-17	1015.75	0.00095275	492.832		9.5275e-11	688.107		9.5275e-11	636.632		9.5275e-10	680.469		9.5275e-08	536.623		9.5275e-07	487.282		9.5275e-06	292.285
							9.61575e-17	1017.98	0.000961575	494.185		9.61575e-11	689.877		9.61575e-11	638.048		9.61575e-10	682.339		9.61575e-08	538.654		9.61575e-07	488.411		9.61575e-06	293.034
							9.70481e-17	1020.21	0.000970481	495.541		9.70481e-11	691.651		9.70481e-11	639.467		9.70481e-10	684.214		9.70481e-08	540.692		9.70481e-07	489.543		9.70481e-06	293.784
							9.7947e-17	1022.45	0.00097947	496.901		9.7947e-11	693.43		9.7947e-11	640.89		9.7947e-10	686.095		9.7947e-08	542.738		9.7947e-07	490.678		9.7947e-06	294.537
							9.88542e-17	1024.7	0.000988542	498.265		9.88542e-11	695.213		9.88542e-11	642.315		9.88542e-10	687.98		9.88542e-08	544.792		9.88542e-07	491.815		9.88542e-06	295.292
							9.97698e-17	1026.95	0.000997698	499.633		9.97698e-11	697.001		9.97698e-11	643.744		9.97698e-10	689.871		9.97698e-08	546.854		9.97698e-07	492.955		9.97698e-06	296.048
							1.00694e-16	1029.2	0.00100694	501.004		1.00694e-10	698.794		1.00694e-10	645.176		1.00694e-09	691.767		1.00694e-07	548.923		1.00694e-06	494.097		1.00694e-05	296.806
							1.01627e-16	1031.46	0.00101627	502.379		1.01627e-10	700.591		1.01627e-10	646.611		1.01627e-09	693.669		1.01627e-07	551.001		1.01627e-06	495.243		1.01627e-05	297.567
							1.02568e-16	1033.72	0.00102568	503.758		1.02568e-10	702.392		1.02568e-10	648.049		1.02568e-09	695.575		1.02568e-07	553.086		1.02568e-06	496.39		1.02568e-05	298.329
							1.03518e-16	1035.99	0.00103518	505.14		1.03518e-10	704.199		1.03518e-10	649.49		1.03518e-09	697.487		1.03518e-07	555.179		1.03518e-06	497.541		1.03518e-05	299.093
							1.04477e-16	1038.27	0.00104477	506.527		1.04477e-10	706.01		1.04477e-10	650.935		1.04477e-09	699.404		1.04477e-07	557.28		1.04477e-06	498.694		1.04477e-05	299.86
							1.05444e-16	1040.55	0.00105444	507.917		1.05444e-10	707.826		1.05444e-10	652.383		1.05444e-09	701.326		1.05444e-07	559.389		1.05444e-06	499.85		1.05444e-05	300.628
							1.06421e-16	1042.83	0.00106421	509.311		1.06421e-10	709.646		1.06421e-10	653.834		1.06421e-09	703.253		1.06421e-07	561.505		1.06421e-06	501.008		1.06421e-05	301.398
							1.07407e-16	1045.12	0.00107407	510.709		1.07407e-10	711.471		1.07407e-10	655.288		1.07407e-09	705.186		1.07407e-07	563.63		1.07407e-06	502.169		1.07407e-05	302.17
							1.08401e-16	1047.41	0.00108401	512.111		1.08401e-10	713.301		1.08401e-10	656.746		1.08401e-09	707.124		1.08401e-07	565.763		1.08401e-06	503.333		1.08401e-05	302.944
							1.09405e-16	1049.71	0.00109405	513.516		1.09405e-10	715.136		1.09405e-10	658.207		1.09405e-09	709.068		1.09405e-07	567.904		1.09405e-06	504.5		1.09405e-05	303.72
							1.10419e-16	1052.02	0.00110419	514.926		1.10419e-10	716.975		1.10419e-10	659.671		1.10419e-09	711.017		1.10419e-07	570.053		1.10419e-06	505.669		1.10419e-05	304.498
							1.11442e-16	1054.33	0.00111442	516.339		1.11442e-10	718.819		1.11442e-10	661.138		1.11442e-09	712.971		1.11442e-07	572.211		1.11442e-06	506.841		1.11442e-05	305.279
							1.12474e-16	1056.64	0.00112474	517.756		1.12474e-10	720.667		1.12474e-10	662.609		1.12474e-09	714.93		1.12474e-07	574.376		1.12474e-06	508.016		1.12474e-05	306.061
							1.13515e-16	1058.96	0.00113515	519.177		1.13515e-10	722.521		1.13515e-10	664.082		1.13515e-09	716.895		1.13515e-07	576.55		1.13515e-06	509.193		1.13515e-05	306.845
							1.14567e-16	1061.29	0.00114567	520.602		1.14567e-10	724.379		1.14567e-10	665.559		1.14567e-09	718.866		1.14567e-07	578.731		1.14567e-06	510.373		1.14567e-05	307.631
							1.15628e-16	1063.62	0.00115628	522.031		1.15628e-10	726.242		1.15628e-10	667.04		1.15628e-09	720.841		1.15628e-07	580.921		1.15628e-06	511.556		1.15628e-05	308.419
							1.16699e-16	1065.95	0.00116699	523.464		1.16699e-10	728.11		1.16699e-10	668.524		1.16699e-09	722.822		1.16699e-07	583.12		1.16699e-06	512.742		1.16699e-05	309.209
							1.1778e-16	1068.29	0.0011778	524.901		1.1778e-10	729.982		1.1778e-10	670.011		1.1778e-09	724.809		1.1778e-07	585.327		1.1778e-06	513.93		1.1778e-05	310.001
							1.18871e-16	1070.64	0.00118871	526.342		1.18871e-10	731.86		1.18871e-10	671.501		1.18871e-09	726.801		1.18871e-07	587.542		1.18871e-06	515.121		1.18871e-05	310.795
							1.19972e-16	1072.99	0.00119972	527.786		1.19972e-10	733.742		1.19972e-10	672.994		1.19972e-09	728.799		1.19972e-07	589.765		1.19972e-06	516.315		1.19972e-05	311.591
							1.21083e-16	1075.34	0.00121083	529.235		1.21083e-10	735.629		1.21083e-10	674.491		1.21083e-09	730.802		1.21083e-07	591.997		1.21083e-06	517.512		1.21083e-05	312.39
							1.22204e-16	1077.7	0.00122204	530.687		1.22204e-10	737.521		1.22204e-10	675.992		1.22204e-09	732.81		1.22204e-07	594.237		1.22204e-06	518.711		1.22204e-05	313.19
							1.23336e-16	1080.07	0.00123336	532.144		1.23336e-10	739.418		1.23336e-10	677.495		1.23336e-09	734.824		1.23336e-07	596.486		1.23336e-06	519.913		1.23336e-05	313.992
							1.24479e-16	1082.44	0.00124479	533.604		1.24479e-10	741.319		1.24479e-10	679.002		1.24479e-09	736.844		1.24479e-07	598.743		1.24479e-06	521.118		1.24479e-05	314.797
							1.25632e-16	1084.82	0.00125632	535.069		1.25632e-10	743.226		1.25632e-10	680.512		1.25632e-09	738.869		1.25632e-07	601.009		1.25632e-06	522.326		1.25632e-05	315.603
							1.26795e-16	1087.2	0.00126795	536.538		1.26795e-10	745.137		1.26795e-10	682.026		1.26795e-09	740.9		1.26795e-07	603.283		1.26795e-06	523.536		1.26795e-05	316.412
							1.2797e-16	1089.58	0.0012797	538.01		1.2797e-10	747.054		1.2797e-10	683.543		1.2797e-09	742.936		1.2797e-07	605.566		1.2797e-06	524.75		1.2797e-05	317.222
							1.29155e-16	1091.98	0.00129155	539.487		1.29155e-10	748.975		1.29155e-10	685.064		1.29155e-09	744.978		1.29155e-07	607.858		1.29155e-06	525.966		1.29155e-05	318.035
							1.30351e-16	1094.37	0.00130351	540.968		1.30351e-10	750.901		1.30351e-10	686.587		1.30351e-09	747.025		1.30351e-07	610.158		1.30351e-06	527.185		1.30351e-05	318.85
							1.31559e-16	1096.78	0.00131559	542.452		1.31559e-10	752.832		1.31559e-10	688.114		1.31559e-09	749.078		1.31559e-07	612.467		1.31559e-06	528.407		1.31559e-05	319.667
							1.32777e-16	1099.18	0.00132777	543.941		1.32777e-10	754.769		1.32777e-10	689.645		1.32777e-09	751.137		1.32777e-07	614.785		1.32777e-06	529.631		1.32777e-05	320.486
							1.34007e-16	1101.6	0.00134007	545.434		1.34007e-10	756.71		1.34007e-10	691.179		1.34007e-09	753.202		1.34007e-07	617.111		1.34007e-06	530.859		1.34007e-05	321.307
							1.35248e-16	1104.02	0.00135248	546.931		1.35248e-10	758.656		1.35248e-10	692.716		1.35248e-09	755.272		1.35248e-07	619.447		1.35248e-06	532.089		1.35248e-05	322.13
							1.36501e-16	1106.44	0.00136501	548.432		1.36501e-10	760.607		1.36501e-10	694.257		1.36501e-09	757.348		1.36501e-07	621.791		1.36501e-06	533.322		1.36501e-05	322.955
							1.37765e-16	1108.87	0.00137765	549.938		1.37765e-10	762.563		1.37765e-10	695.801		1.37765e-09	759.429		1.37765e-07	624.144		1.37765e-06	534.558		1.37765e-05	323.782
							1.39041e-16	1111.3	0.00139041	551.447		1.39041e-10	764.524		1.39041e-10	697.349		1.39041e-09	761.516		1.39041e-07	626.506		1.39041e-06	535.797		1.39041e-05	324.612
							1.40329e-16	1113.74	0.00140329	552.961		1.40329e-10	766.491		1.40329e-10	698.9		1.40329e-09	763.609		1.40329e-07	628.877		1.40329e-06	537.039		1.40329e-05	325.443
							1.41629e-16	1116.19	0.00141629	554.478		1.41629e-10	768.462		1.41629e-10	700.455		1.41629e-09	765.708		1.41629e-07	631.257		1.41629e-06	538.284		1.41629e-05	326.277
							1.4294e-16	1118.64	0.0014294	556		1.4294e-10	770.438		1.4294e-10	702.013		1.4294e-09	767.812		1.4294e-07	633.645		1.4294e-06	539.531		1.4294e-05	327.113
							1.44264e-16	1121.09	0.00144264	557.526		1.44264e-10	772.42		1.44264e-10	703.574		1.44264e-09	769.923		1.44264e-07	636.043		1.44264e-06	540.782		1.44264e-05	327.951
							1.45601e-16	1123.55	0.00145601	559.056		1.45601e-10	774.406		1.45601e-10	705.139		1.45601e-09	772.039		1.45601e-07	638.45		1.45601e-06	542.035		1.45601e-05	328.791
							1.46949e-16	1126.02	0.00146949	560.591		1.46949e-10	776.398		1.46949e-10	706.708		1.46949e-09	774.161		1.46949e-07	640.866		1.46949e-06	543.291		1.46949e-05	329.634
							1.4831e-16	1128.49	0.0014831	562.129		1.4831e-10	778.395		1.4831e-10	708.28		1.4831e-09	776.288		1.4831e-07	643.291		1.4831e-06	544.551		1.4831e-05	330.478
							1.49684e-16	1130.97	0.00149684	563.672		1.49684e-10	780.396		1.49684e-10	709.855		1.49684e-09	778.422		1.49684e-07	645.726		1.49684e-06	545.813		1.49684e-05	331.325
							1.5107e-16	1133.45	0.0015107	565.219		1.5107e-10	782.403		1.5107e-10	711.434		1.5107e-09	780.561		1.5107e-07	648.169		1.5107e-06	547.078		1.5107e-05	332.173
							1.5247e-16	1135.94	0.0015247	566.771		1.5247e-10	784.416		1.5247e-10	713.016		1.5247e-09	782.706		1.5247e-07	650.622		1.5247e-06	548.346		1.5247e-05	333.024
							1.53882e-16	1138.43	0.00153882	568.326		1.53882e-10	786.433		1.53882e-10	714.602		1.53882e-09	784.858		1.53882e-07	653.084		1.53882e-06	549.616		1.53882e-05	333.878
							1.55307e-16	1140.93	0.00155307	569.886		1.55307e-10	788.456		1.55307e-10	716.192		1.55307e-09	787.015		1.55307e-07	655.556		1.55307e-06	550.89		1.55307e-05	334.733
							1.56746e-16	1143.44	0.00156746	571.45		1.56746e-10	790.483		1.56746e-10	717.785		1.56746e-09	789.178		1.56746e-07	658.037		1.56746e-06	552.167		1.56746e-05	335.59
							1.58197e-16	1145.95	0.00158197	573.019		1.58197e-10	792.516		1.58197e-10	719.381		1.58197e-09	791.347		1.58197e-07	660.527		1.58197e-06	553.447		1.58197e-05	336.45
							1.59663e-16	1148.46	0.00159663	574.592		1.59663e-10	794.555		1.59663e-10	720.981		1.59663e-09	793.522		1.59663e-07	663.026		1.59663e-06	554.729		1.59663e-05	337.312
							1.61141e-16	1150.99	0.00161141	576.169		1.61141e-10	796.598		1.61141e-10	722.585		1.61141e-09	795.703		1.61141e-07	665.536		1.61141e-06	556.015		1.61141e-05	338.176
							1.62634e-16	1153.51	0.00162634	577.75		1.62634e-10	798.647		1.62634e-10	724.192		1.62634e-09	797.89		1.62634e-07	668.054		1.62634e-06	557.304		1.62634e-05	339.043
							1.6414e-16	1156.04	0.0016414	579.336		1.6414e-10	800.701		1.6414e-10	725.803		1.6414e-09	800.082		1.6414e-07	670.582		1.6414e-06	558.595		1.6414e-05	339.911
							1.65661e-16	1158.58	0.00165661	580.926		1.65661e-10	802.76		1.65661e-10	727.417		1.65661e-09	802.281		1.65661e-07	673.12		1.65661e-06	559.89		1.65661e-05	340.782
							1.67195e-16	1161.13	0.00167195	582.52		1.67195e-10	804.825		1.67195e-10	729.035		1.67195e-09	804.486		1.67195e-07	675.667		1.67195e-06	561.188		1.67195e-05	341.655
							1.68744e-16	1163.67	0.00168744	584.119		1.68744e-10	806.894		1.68744e-10	730.657		1.68744e-09	806.697		1.68744e-07	678.224		1.68744e-06	562.488		1.68744e-05	342.53
							1.70307e-16	1166.23	0.00170307	585.722		1.70307e-10	808.97		1.70307e-10	732.282		1.70307e-09	808.915		1.70307e-07	680.791		1.70307e-06	563.792		1.70307e-05	343.408
							1.71884e-16	1168.79	0.00171884	587.33		1.71884e-10	811.05		1.71884e-10	733.911		1.71884e-09	811.138		1.71884e-07	683.367		1.71884e-06	565.098		1.71884e-05	344.288
							1.73476e-16	1171.36	0.00173476	588.942		1.73476e-10	813.136		1.73476e-10	735.543		1.73476e-09	813.367		1.73476e-07	685.953		1.73476e-06	566.408		1.73476e-05	345.17
							1.75083e-16	1173.93	0.00175083	590.558		1.75083e-10	815.227		1.75083e-10	737.18		1.75083e-09	815.603		1.75083e-07	688.549		1.75083e-06	567.721		1.75083e-05	346.054
							1.76704e-16	1176.5	0.00176704	592.179		1.76704e-10	817.324		1.76704e-10	738.819		1.76704e-09	817.844		1.76704e-07	691.154		1.76704e-06	569.037		1.76704e-05	346.94
							1.78341e-16	1179.09	0.00178341	593.805		1.78341e-10	819.426		1.78341e-10	740.463		1.78341e-09	820.092		1.78341e-07	693.77		1.78341e-06	570.355		1.78341e-05	347.829
							1.79993e-16	1181.68	0.00179993	595.434		1.79993e-10	821.533		1.79993e-10	742.11		1.79993e-09	822.346		1.79993e-07	696.395		1.79993e-06	571.677		1.79993e-05	348.72
[truncated: 186 more rows]

## Sheet: Fig.6 LOD
Fig. 6 Description: Comparison of the Pb²⁺ LOD of this work with representative reports from different sensing categories. Data type: Literature LOD comparison and this work. X-axis: Limit of detection of Pb²⁺ (M) Y-axis: Sensing category Categories: SPR sensors Fluorescent probes Colorimetric/LSPR probes Electrochemical/PEC biosensors Notes: Reported LOD values were converted to molar concentrat…
[truncated: 17 more rows]

[truncated: 12 more sheets: Fig.S1ab RI curves, Fig.S1c RI fitting, Fig.S2 Repeatability, Fig.S3 11nm validation, Fig.S4 Bare-Au Pb, Fig.S5 Cd, Fig.S6 Cu, Fig.S7 Zn, Fig.S8 Ni, Fig.S9 Ca, Fig.S10 Mg, Fig.S11 Stability]
